# Supplementary material for: Designing green chemicals by predicting vaporization properties using explainable graph attention networks
Source: Royal Society of Chemistry journal article supplement (doi:10.1039/d4gc01994f), 2024-01-01
Supplement: d4gc01994f2.xlsx [file d4gc01994f2.xlsx]

## Sheet: Literature_1
HoV (kJ/mol)	Pred_literature	Train/Valid/Test	temperature	smiles	AE
72.48	62.57	Train	649.7	CC(C)C1=CC2=CC[C@H]3[C@](C)(C(=O)O)CCC[C@]3(C)[C@H]2CC1	9.91
50.9	49.6	Train	550.54	c1cc2c3c(cccc3c1)CC2	1.3
35.13	35.18	Test	376.75	CCOC(C)OCC	0.05
24.63	26.35	Train	293.55	CC=O	1.72
40.83	40.39	Train	411.78	CC(=O)OC(C)=O	0.44
29.79	29.67	Test	329.44	CC(C)=O	0.12
44.25	43.71	Train	475.15	CC(=O)c1ccccc1	0.54
40.83	39.41	Train	413.55	CC(=O)CC(C)=O	1.42
29.03	29.33	Train	325.84	C=CC=O	0.3
42.52	44.16	Train	414.15	C=CC(=O)O	1.64
72.94	70.3	Train	611	O=C(O)CCCCC(=O)O	2.64
20.6	18.66	Train	238.65	C=C=C	1.94
33.53	35.38	Train	377.15	C=CCOC(C)=O	1.85
39.8	38.52	Test	370.23	C=CCO	1.28
38.54	38.34	Train	438.65	C=C(C)c1ccccc1	0.2
39.91	39.27	Train	448.15	CC1=CCC(C(C)C)C=C1	0.64
35.74	37.29	Test	429.29	CC1=CCC2CC1C2(C)C	1.55
47.73	46.89	Train	508.45	CC=Cc1ccc(OC)cc1	0.84
39.31	38.83	Train	426.73	COc1ccccc1	0.48
54.92	56.14	Train	615.18	c1ccc2cc3ccccc3cc2c1	1.22
62.02	64.16	Train	653.05	O=C1c2ccccc2C(=O)c2ccccc21	2.14
76.2	71.83	Train	633.36	O=C(O)CCCCCCCC(=O)O	4.37
55.48	46.27	Train	515.16	c1ccc2cccc-2cc1	9.21
42.13	41.46	Train	451.9	O=Cc1ccccc1	0.67
30.75	29.88	Train	353.24	c1ccccc1	0.87
68.38	62.09	Train	581.85	Oc1cccc(O)c1O	6.29
50.63	54.03	Train	522.4	O=C(O)c1ccccc1	3.4
54.03	53.86	Train	579.24	O=C(c1ccccc1)c1ccccc1	0.17
44.58	46.06	Test	486.65	CC(=O)OCc1ccccc1	1.48
51.66	48.31	Train	477.85	OCc1ccccc1	3.35
58.71	56.82	Train	596.65	O=C(OCc1ccccc1)c1ccccc1	1.89
41.67	41.88	Train	458.15	CCOCc1ccccc1	0.21
39.5	39.17	Train	447.15	C=C1C=CC(C(C)C)CC1	0.33
37.83	38.31	Train	439.19	C=C1CCC2CC1C2(C)C	0.48
43.06	41.98	Train	435.15	O=C1CCO1	1.08
44.52	45.28	Test	512.19	C1CCC(C2CCCCC2)CC1	0.76
72.18	62.75	Test	633.65	CC(C)(c1ccc(O)cc1)c1ccc(O)cc1	9.43
24.22	23.07	Train	284	C=C=CC	1.15
22.44	21.5	Train	272.65	CCCC	0.94
62.43	58.87	Train	501.15	OCCCCO	3.56
56.58	55.44	Train	480.15	CC(O)CCO	1.14
53.53	53.79	Test	464.15	CCC(O)CO	0.26
40.96	38.23	Train	372.7	CCC(C)O	2.73
40.11	36.46	Train	355.57	CC(C)(C)O	3.65
43.24	40.1	Train	390.81	CCCCO	3.14
22.91	22.01	Train	274.03	CC=CC	0.9
23.43	22.3	Test	276.87	CC=CC	1.13
22.44	21.27	Test	266.9	C=CCC	1.17
62.95	59.84	Train	510	OCC=CCO	3.11
62.74	59.65	Train	508.15	OCC=CCO	3.09
48.85	46.92	Train	445.05	CC=CC(=O)O	1.93
48.88	48.27	Train	458.15	CC=CC(=O)O	0.61
41.453	41.65	Train	471.83	CCC=Cc1ccccc1	0.197
40.563	40.65	Test	462.15	CCC=Cc1ccccc1	0.087
46.15	46.43	Train	444.47	CCCCOCCO	0.28
36.51	37.41	Train	399.15	CCCCOC(C)=O	0.9
34.68	35.97	Train	385.15	CCC(C)OC(C)=O	1.29
32.58	34.32	Train	369.15	CC(=O)OC(C)(C)C	1.74
37.46	39.53	Train	421	C=CC(=O)OCCCC	2.07
49.27	49.48	Test	523.15	CCCCOC(=O)c1ccccc1	0.21
36.391	38.11	Train	409.15	CCCC(=O)OC(C)(C)C	1.719
40.29	41.1	Train	438.15	CCCCOC(=O)CCC	0.81
38.214	39.76	Train	425.15	CCCC(=O)OC(C)CC	1.546
30.604	33.15	Test	355.95	CC(C)(C)OC=O	2.546
35.97	35.56	Train	379.25	CCCCOC=O	0.41
31.35	33.94	Train	363.55	CCC(C)OC=O	2.59
40.2	40.71	Train	434	C=C(C)C(=O)OCCCC	0.51
50.52	46.85	Test	503	CCCCCCCCC(=O)OCCCC	3.67
41.093	38.82	Train	414.55	CCC(=O)OC(C)(C)C	2.273
39.055	39.11	Train	417.34	CCC(=O)OC(C)CC	0.055
38.66	39.36	Train	419.75	CCCCOC(=O)CC	0.7
58.35	55.47	Train	623.15	CCCCCCCCCCCCCCCCCC(=O)OCCCC	2.88
43.53	43.17	Train	459.65	CCCCOC(=O)CCCC	0.36
32.9	32.84	Train	366.97	C=COCCCC	0.06
48.868	49.46	Train	551.65	CCCCC1CCc2ccccc2C1	0.592
48.348	48.91	Train	546.28	CCCCC1CCCc2ccccc21	0.562
38.44	38.57	Test	442.3	CC(C)(C)c1ccccc1	0.13
39.12	39	Train	446.48	CCC(C)c1ccccc1	0.12
40.37	40.03	Train	456.46	CCCCc1ccccc1	0.34
38.74	39.49	Test	454.13	CCCCC1CCCCC1	0.75
35.119	35.88	Train	418	CC(C)(C)C1CCCC1	0.761
36.36	37.09	Train	429.76	CCCCC1CCCC1	0.73
36.631	36.86	Train	427.5	CCC(C)C1CCCC1	0.229
37.217	37.39	Train	429.15	CCCCC1=CCCC1	0.173
52.56	50.64	Train	562.54	CCCCc1cccc2ccccc12	1.92
53.6	50.6	Train	562.16	CCCCc1ccc2ccccc2c1	3
49.034	49.2	Test	521.15	CCCCc1ccc(O)cc1	0.166
46.973	47.03	Train	500.15	CCCCc1ccccc1O	0.057
48.936	49.1	Test	520.15	CCCCc1cccc(O)c1	0.164
68.61	59.92	Train	511.15	OCC#CCO	8.69
31.79	31.29	Train	347.95	CCCC=O	0.5
45.29	45.99	Train	436.42	CCCC(=O)O	0.7
46.73	45.41	Train	468.15	CCCC(=O)OC(=O)CCC	1.32
36.32	37.74	Train	433.65	C=C1C2CCC(C2)C1(C)C	1.42
41.64	44.14	Train	480.57	CC12CCC(CC1=O)C2(C)C	2.5
5.91	5.05	Train	81.7	[C-]#[O+]	0.86
68.9	66.05	Train	714.15	c1ccc2c(c1)ccc1c3ccccc3ccc21	2.85
73.07	75.54	Train	607	C/C(=C/C(=O)O)C(=O)O	2.47
102.23	98.32	Test	659	O=C(O)CC(O)(CC(=O)O)C(=O)O	3.91
48.68	45.04	Train	475.43	Cc1cccc(O)c1	3.64
49.63	45.01	Train	475.13	Cc1ccc(O)cc1	4.62
45.67	43.88	Test	464.15	Cc1ccccc1O	1.79
34.81	34.36	Train	377.25	C/C=C/C=O	0.45
38.07	36.95	Train	425.56	CC(C)c1ccccc1	1.12
44.522	45.36	Test	442.7	CC(C)(OO)c1ccccc1	0.838
61.17	57.6	Test	608.15	CC(C)(c1ccccc1)c1ccc(O)cc1	3.57
23.98	22.98	Train	285.66	C1CCC1	1
25.81	22.32	Test	275.75	C1=CCC1	3.49
40.704	41.67	Train	475.15	C1CCCCCCCCC1	0.966
45.053	45.28	Train	512.15	C1CCCCCCCCCCC1	0.227
55.638	55.83	Train	621.15	C1CCCCCCCCCCCCCCCCCCC1	0.192
52.22	52.46	Test	586.15	C1CCCCCCCCCCCCCCCC1	0.24
33.55	33.44	Train	391.94	C1CCCCCC1	0.11
35.32	33.53	Train	388.65	C1=CC=CCC=C1	1.79
50.955	51.2	Train	573.15	C1CCCCCCCCCCCCCCC1	0.245
30.59	30.01	Train	353.49	C1=CCCC=C1	0.58
29.89	29.65	Train	353.87	C1CCCCC1	0.24
80.76	75.87	Train	669	O=C(O)C1CCC(C(=O)O)CC1	4.89
45.92	44.04	Train	434	OC1CCCCC1	1.88
38.76	39.38	Train	428.9	O=C1CCCCC1	0.62
31.11	30.24	Train	356.12	C1=CCCCC1	0.87
49.744	46	Train	490	OOC1CCCCC1	3.744
47.15	45.82	Train	513.27	c1ccc(C2CCCCC2)cc1	1.33
54.562	54.78	Train	610.15	C1CCCCCCCCCCCCCCCCCC1	0.218
38.745	39.34	Test	451.55	C1CCCCCCCC1	0.595
53.39	53.62	Train	598.15	C1CCCCCCCCCCCCCCCCC1	0.23
37.45	36.94	Train	423.27	C1=CCCC=CCC1	0.51
35.92	36.65	Train	424.3	C1CCCCCCC1	0.73
36.4	35.96	Train	413.16	C1=CC=CC=CC=C1	0.44
49.595	49.85	Train	559.15	C1CCCCCCCCCCCCCC1	0.255
25.76	26.17	Train	314.65	C1=CCC=C1	0.41
27.26	26.57	Train	322.4	C1CCCC1	0.69
37.62	36.97	Train	403.8	O=C1CCCC1	0.65
27.6	26.41	Train	317.38	C1=CCCC1	1.19
20.08	18.58	Train	240.37	C1CC1	1.5
48.142	48.39	Train	544.15	C1CCCCCCCCCCCCC1	0.248
46.692	46.93	Test	529.15	C1CCCCCCCCCCCC1	0.238
42.13	43.52	Test	494.15	C1CCCCCCCCCC1	1.39
39.1	39.18	Test	448.23	Cc1cccc(C(C)C)c1	0.08
39.75	39.39	Train	450.28	Cc1ccc(C(C)C)cc1	0.36
39.38	39.5	Test	451.33	Cc1ccccc1C(C)C	0.12
39.8	41.03	Train	468.97	C1CCC2CCCCC2C1	1.23
38.62	40.15	Test	460.46	C1CCC2CCCCC2C1	1.53
46.73	41.54	Test	488.15	CCCCCCCCCC=O	5.19
40.02	38.65	Train	447.3	CCCCCCCCCC	1.37
65.387	57.79	Train	553.15	CCCCCCCCC(O)CO	7.597
66.733	58.92	Train	564.15	CCCCCCCC(O)CCO	7.813
69.306	62.68	Train	585.15	CCCCCCC(O)CCCO	6.626
68.242	60.06	Train	572.15	OCCCCCCCCCCO	8.182
61.46	52.28	Train	543.15	CCCCCCCCCC(=O)O	9.18
52.26	46.97	Train	503.35	CCCCCCCCCCO	5.29
45.164	48.59	Train	490.15	CCCCCCCCC(C)O	3.426
49.145	47.85	Train	483	CCCCCCCC(O)CC	1.295
48.208	47.25	Train	474.15	CCCCCC(O)CCCC	0.958
49.16	48.18	Train	483.15	CCCCCCC(O)CCC	0.98
44.867	43.98	Train	483.35	CCCCCCCCC(C)=O	0.887
39.36	38.34	Train	443.75	C=CCCCCCCCC	1.02
45.534	45.49	Train	517.15	CCCCCCCCCCOC(C)=O	0.044
49.014	48.99	Test	553.15	CCCCCCCCCCOC(=O)CCC	0.024
46.075	44.72	Train	508.6	CCCCCCCCCCOC=O	1.355
49.199	49.3	Train	555.06	CCCCCCCCCCOC(=O)CC	0.101
56.911	57.16	Test	634.15	CCCCCCCCCCC1CCCc2ccccc21	0.249
57.107	57.37	Train	636.15	CCCCCCCCCCC1CCc2ccccc2C1	0.263
53.53	50.97	Train	571.04	CCCCCCCCCCc1ccccc1	2.56
50.37	50.96	Train	570.75	CCCCCCCCCCC1CCCCC1	0.59
49	49.16	Train	552.54	CCCCCCCCCCC1CCCC1	0.16
47.948	48.14	Train	542.15	CCCCCCCCCCC1=CCCC1	0.192
58.679	59.08	Train	652.15	CCCCCCCCCCc1cccc2ccccc12	0.401
59.072	59.49	Train	656.15	CCCCCCCCCCc1ccc2ccccc2c1	0.418
39.509	39.55	Train	452.45	CCC#CCCCCCC	0.041
39.994	39.78	Train	457.75	CC#CCCCCCCC	0.214
39.65	38.69	Train	447.16	C#CCCCCCCCC	0.96
54.21	57.31	Train	520	C=CCOC(=O)/C=C\C(=O)OCC=C	3.1
45.49	51.92	Train	557.86	c1ccc2c(c1)oc1ccccc12	6.43
53.7	52.07	Train	561.45	c1ccc(COCc2ccccc2)cc1	1.63
37.35	37.28	Train	413.44	CCCCOCCCC	0.07
58.15	60.24	Test	553.15	CCCCOC(=O)/C=C\C(=O)OCCCC	2.09
62.44	66.07	Train	613.15	CCCCOC(=O)c1ccccc1C(=O)OCCCC	3.63
66.45	58.5	Train	622.15	CCCCOC(=O)CCCCCCCCC(=O)OCCCC	7.95
50.272	50.48	Train	566.12	CCCC(C1CCCCC1)C1CCCCC1	0.208
57.5	57.64	Train	640.15	CCCCCCCCCC(C1CCCCC1)C1CCCCC1	0.14
59.465	59.56	Train	660.15	CCCCCCCCCCCC(C1CCCCC1)C1CCCCC1	0.095
48.158	48.41	Train	544.32	CC(C1CCCCC1)C1CCCCC1	0.252
54.073	54.26	Test	605.15	CCCCCCC(C1CCCCC1)C1CCCCC1	0.187
63.114	63.1	Train	697.15	CCCCCCCCCCCCCCCC(C1CCCCC1)C1CCCCC1	0.014
52.902	53.1	Train	593.15	CCCCCC(C1CCCCC1)C1CCCCC1	0.198
46.383	46.6	Train	525.95	C1CCC(CC2CCCCC2)CC1	0.217
56.421	56.58	Train	629.15	CCCCCCCCC(C1CCCCC1)C1CCCCC1	0.159
55.246	55.42	Test	617.15	CCCCCCCC(C1CCCCC1)C1CCCCC1	0.174
62.225	62.24	Train	688.15	CCCCCCCCCCCCCCC(C1CCCCC1)C1CCCCC1	0.015
51.636	51.84	Train	580.15	CCCCC(C1CCCCC1)C1CCCCC1	0.204
49.359	49.6	Test	556.71	CCC(C1CCCCC1)C1CCCCC1	0.241
61.337	61.38	Train	679.15	CCCCCCCCCCCCCC(C1CCCCC1)C1CCCCC1	0.043
60.45	60.52	Train	670.15	CCCCCCCCCCCCC(C1CCCCC1)C1CCCCC1	0.07
58.482	58.6	Train	650.15	CCCCCCCCCCC(C1CCCCC1)C1CCCCC1	0.118
37.31	38.74	Train	443	C1=CC2C3C=CC(C3)C2C1	1.43
52.595	51.02	Train	590	CCCCCCCCCCOCCCCCCCCCC	1.575
37.97	39.03	Test	399.95	CCOC(=O)OCC	1.06
27.09	27.08	Train	307.58	CCOCC	0.01
33.57	33.88	Train	375.14	CCC(=O)CC	0.31
48.34	55.52	Train	498.15	CCOC(=O)/C=C\C(=O)OCC	7.18
46.09	47.43	Train	472.05	CCOC(=O)CC(=O)OCC	1.34
45.14	46.26	Train	458.85	CCOC(=O)C(=O)OCC	1.12
57.43	61.81	Train	567.15	CCOC(=O)c1ccccc1C(=O)OCC	4.38
50.57	54.42	Train	489.65	CCOC(=O)CCC(=O)OCC	3.85
58.22	57.09	Test	507.15	CCC(CC)(CO)CO	1.13
43.784	44.7	Train	446	CCC(CC)(CC)CO	0.916
37.53	38.2	Test	442.86	CCC(CC)(CC)C(C)C	0.67
45.163	46.06	Train	461	CCC(CC)(CC)C(C)O	0.897
40.33	39.81	Train	454.29	CCc1cccc(CC)c1	0.52
40.24	40.05	Train	456.61	CCc1ccccc1CC	0.19
40.58	40.08	Test	456.94	CCc1ccc(CC)cc1	0.5
36.474	36.78	Test	426.71	CCC1CCCC1CC	0.306
36.297	36.46	Train	423.65	CCC1(CC)CCCC1	0.163
36.155	36.41	Train	423.15	CCC1CCC(CC)C1	0.255
35.934	36.15	Test	420.68	CCC1CCCC1CC	0.216
36.155	36.41	Train	423.15	CCC1CCC(CC)C1	0.255
56.72	60.65	Train	518.15	OCCOCCO	3.93
51.27	48.68	Train	529.15	CCCCOCCOCCOCCCC	2.59
44.76	45.27	Train	462.15	CCOCCOCCOCC	0.51
41.23	42.6	Train	432.91	COCCOCCOC	1.37
47.41	47.76	Train	490.55	CCOCCOCCOC(C)=O	0.35
54.05	50.63	Test	504.15	CCCCOCCOCCO	3.42
39.664	39.15	Test	453.15	CCCC(CC)C(CC)CC	0.514
39.897	39.86	Train	460.05	CCCCC(CC)(CC)CC	0.037
39.298	39.18	Test	453.45	CCCC(CC)(CC)CCC	0.118
39.573	39.05	Train	452.15	CCC(CC)CC(CC)CC	0.523
37.61	37.85	Train	439.46	CCCC(CC)(CC)CC	0.24
37.66	37.6	Train	437.06	CCC(CC)C(CC)CC	0.06
52.148	53.01	Train	585.41	CCc1ccc2cccc(CC)c2c1	0.862
52.148	53.01	Train	585.41	CCc1cc2ccccc2cc1CC	0.862
52.148	53.01	Train	585.41	CCc1ccc(CC)c2ccccc12	0.862
52.148	53.01	Train	585.41	CCc1ccc2ccccc2c1CC	0.862
52.148	53.01	Train	585.41	CCc1ccc2c(CC)cccc2c1	0.862
41.31	41.11	Train	473.15	CCCCC(CC)(CC)CCC	0.2
41.789	41.63	Test	478.15	CCCCCC(CC)(CC)CC	0.159
41.502	41.32	Train	475.15	CCC(CC)CCC(CC)CC	0.182
41.024	40.8	Train	470.15	CCCC(CC)CC(CC)CC	0.224
41.024	40.8	Train	470.15	CCCC(CC)C(CC)CCC	0.224
41.215	41.01	Train	472.15	CCCCC(CC)C(CC)CC	0.205
35.28	35.88	Train	419.34	CCC(CC)(CC)CC	0.6
51.577	51.96	Test	547.87	CCc1ccc(O)cc1CC	0.383
46.993	47.14	Train	501.15	CCc1ccc(O)c(CC)c1	0.147
46.881	47.02	Train	500	CCc1ccc(CC)c(O)c1	0.139
47.37	47.53	Test	505	CCc1cccc(O)c1CC	0.16
46.014	46.1	Test	491.15	CCc1cccc(CC)c1O	0.086
47.271	49.15	Train	535.15	CCCCCCCOCCCCCCC	1.879
65.09	58.41	Train	621.15	CCCCCCOC(=O)CCCCC(=O)OCCCCCC	6.68
48.12	45.61	Train	498.85	CCCCCCOCCCCCC	2.51
30.39	30.5	Train	339	C1=CCOC1	0.11
53.106	54.38	Train	538.15	Cc1c(O)cccc1O	1.274
54.959	57.53	Train	556.15	Cc1cc(O)ccc1O	2.571
51.359	52.61	Test	521.15	Cc1cccc(O)c1O	1.251
53.621	54.89	Train	543.15	Cc1ccc(O)cc1O	1.269
52.387	53.65	Train	531.15	Cc1ccc(O)c(O)c1	1.263
55.371	56.64	Test	560.15	Cc1cc(O)cc(O)c1	1.269
39.57	40.08	Train	441.41	CC(C)CC(=O)CC(C)C	0.51
71.2	73.38	Train	723	CC(C)CCCCCCCOC(=O)c1ccccc1C(=O)OCCCCCCCC(C)C	2.18
71.11	70.52	Train	694	CC(C)CCCCCOC(=O)c1ccccc1C(=O)OCCCCCC(C)C	0.59
29.58	30.16	Train	341.45	CC(C)OC(C)C	0.58
41.62	41.87	Train	476.33	CC(C)c1cccc(C(C)C)c1	0.25
42.92	42.63	Train	483.65	CC(C)c1ccc(C(C)C)cc1	0.29
38.82	38.02	Train	399.2	C=C1CC(=O)O1	0.8
31.9	33.75	Train	357.2	COCCOC	1.85
21.56	21.62	Train	248.31	COC	0.06
47.1	53.41	Test	478.15	COC(=O)/C=C\C(=O)OC	6.31
55	61.1	Train	556.85	COC(=O)c1ccccc1C(=O)OC	6.1
52.83	56.1	Train	561.15	COC(=O)c1ccc(C(=O)OC)cc1	3.27
54.17	54.6	Train	480	CC(C)C(C)(O)CO	0.43
54.012	54.46	Train	478.65	CC(C)(C)C(O)CO	0.448
58.799	58.1	Train	517.03	CC(C)(C)CC(O)CO	0.699
28.91	28.68	Train	341.93	C=C(C)C(=C)C	0.23
54.17	54.6	Train	480	CC(CO)C(C)(C)O	0.43
53.649	54.14	Train	475.55	CC(O)C(C)(C)CO	0.491
55.104	54.86	Train	485.65	CCC(O)C(C)(C)CO	0.244
58.799	58.1	Train	517.03	CCC(C)(O)C(C)CO	0.699
54.167	54.57	Train	476.15	CC(C)(CO)CO	0.403
54.17	55.89	Train	480	CC(C)(CO)CCO	1.72
58.799	59.4	Train	517.03	CC(CCO)C(C)(C)O	0.601
56.686	55.75	Train	494.25	CC(C)(CO)CCCO	0.936
56.686	55.75	Train	494.25	CC(C)(CCO)CCO	0.936
39.669	42.07	Train	416.15	CC(C)(C)CCO	2.401
37.935	41.43	Train	409.95	CCC(C)(C)CO	3.495
39.805	42.69	Train	422.15	CC(C)C(C)CO	2.885
27.47	27.29	Train	328.76	C=C(C)C(C)C	0.18
25.93	25.8	Train	314.4	C=CC(C)(C)C	0.13
25.479	25.44	Train	310.87	C#CC(C)(C)C	0.039
34.604	34.96	Train	409.15	CCC1(C)CCC(C)C1	0.356
34.604	34.96	Test	409.15	CCC1(C)CCC(C)C1	0.356
35.314	35.79	Train	417.15	CCC1(C)CCCC1C	0.476
35.314	35.79	Test	417.15	CCC1(C)CCCC1C	0.476
52.148	53.01	Train	585.41	CCc1ccc(C)c2cc(C)ccc12	0.862
52.148	53.01	Train	585.41	CCc1c(C)cc(C)c2ccccc12	0.862
44.988	45.44	Train	455	CC(C)(C)CCCCCO	0.452
45.481	45.44	Train	455	CC(C)CC(C)CCCO	0.041
46.034	46.49	Train	465.15	CCCCCC(C)(C)CO	0.456
44.372	44.8	Train	447	CCCC(C)C(C)CO	0.428
44.705	45.63	Train	455	CC(C)(C)CCCCO	0.925
45.2	45.62	Train	455	CC(C)C(C)CCCO	0.42
44.705	45.63	Train	455	CCC(C)(C)CCCO	0.925
44.491	44.92	Test	448.15	CCC(C)CC(C)CO	0.429
45.319	45.74	Test	456.15	CC(C)CC(C)CCO	0.421
45.097	45.52	Test	454	CCC(C)C(C)CCO	0.423
44.905	45.33	Test	452.15	CC(C)CCC(C)CO	0.425
44.603	45.52	Train	454	CCCC(C)(C)CCO	0.917
43.748	44.66	Train	445.65	CCCCC(C)(C)CO	0.912
32.673	32.75	Train	384.35	C=C(C)CC(C)CC	0.077
31.96	32.34	Train	380.35	C=CCC(C)(C)CC	0.38
32.61	32.68	Train	383.65	C=C(C)C(C)CCC	0.07
32.708	32.79	Train	384.75	C=C(C)CCC(C)C	0.082
31.678	32.01	Train	377.15	C=CC(C)(C)CCC	0.332
32.704	32.83	Train	385.15	C=CC(C)C(C)CC	0.126
31.992	32.01	Train	377.15	C=CC(C)CC(C)C	0.018
32.437	32.52	Test	382.15	C=CCC(C)C(C)C	0.083
31.546	31.85	Train	375.65	C=CCCC(C)(C)C	0.304
48.889	48.37	Train	485	CCCC(C)C(C)CCCO	0.519
48.889	48.37	Train	485	CCC(C)CC(C)CCCO	0.519
48.889	48.37	Train	485	CC(C)CCC(C)CCCO	0.519
48.37	48.37	Train	485	CC(C)(C)CCCCCCO	0
48.905	48.38	Train	485.15	CC(C)CCCC(C)CCO	0.525
48.679	48.16	Test	483	CCC(C)CCCC(C)CO	0.519
47.97	47.97	Train	481.15	CCCCCCC(C)(C)CO	0
42.564	43.48	Train	432.15	CC(C)CC(C)CO	0.916
42.196	43.58	Test	433.15	CC(C)(C)CCCO	1.384
43.18	44.1	Train	438.15	CC(C)C(C)CCO	0.92
43.077	43.99	Train	437.15	CCC(C)C(C)CO	0.913
41.485	42.86	Train	426.15	CCCC(C)(C)CO	1.375
42.704	44.1	Train	438.15	CCC(C)(C)CCO	1.396
29.86	29.82	Test	354.76	C=C(C)CC(C)C	0.04
30.096	30.1	Train	357.43	C=C(C)C(C)CC	0.004
29.173	29.4	Train	350.63	C=CC(C)(C)CC	0.227
29.752	29.74	Train	353.95	C=CC(C)C(C)C	0.012
28.74	28.89	Train	345.67	C=CCC(C)(C)C	0.15
28.934	29.25	Train	349.23	C#CCC(C)(C)C	0.316
29.558	29.66	Train	353.15	C#CC(C)C(C)C	0.102
28.405	28.63	Test	343.15	C#CC(C)(C)CC	0.225
41.35	39.27	Train	386.25	CC(C)(C)CO	2.08
49.089	51.09	Train	445.95	CC(C)(O)C(C)(C)O	2.001
52.99	53.06	Train	589	CC(C)(c1ccccc1)C(C)(C)c1ccccc1	0.07
58.56	59.02	Train	525.85	CCC(C)(O)C(C)(C)O	0.46
51.462	52.13	Train	459.15	CC(C)C(O)C(C)(C)O	0.668
52.121	53.25	Train	470	CC(C)(O)CC(C)(C)O	1.129
35.869	39.55	Train	391.75	CC(C)C(C)(C)O	3.681
36.004	39.7	Train	393.15	CC(O)C(C)(C)C	3.696
32.071	34.14	Train	379.45	CC(=O)C(C)(C)C	2.069
29.41	29.1	Train	346.35	CC(C)=C(C)C	0.31
43.353	44.7	Train	446	CCC(CO)C(C)(C)C	1.347
43.353	44.7	Train	446	CCC(C)(CO)C(C)C	1.347
31.964	32.63	Train	383.15	C=C(CC)C(C)(C)C	0.666
48.011	48.47	Train	486	CCC(CO)CCC(C)(C)C	0.459
45.178	46.07	Test	461.15	CCC(C)(CO)CC(C)C	0.892
34.782	35.17	Train	411.15	CCC1CCCC1(C)C	0.388
48.271	48.57	Train	515	CCc1c(O)ccc(C)c1C	0.299
50.231	50.63	Train	535	CCc1c(C)cc(C)cc1O	0.399
44.55	45.44	Test	455	CCC(C)CCC(C)(C)O	0.89
43.443	44.32	Train	444.15	CC(C)CCCC(C)(C)O	0.877
44.55	45.44	Train	455	CCCCC(C)C(C)(C)O	0.89
46.292	46.69	Train	467.15	CC(C)CC(C)CC(C)O	0.398
46.086	46.49	Train	465.15	CC(O)CCC(C)C(C)C	0.404
44.55	45.44	Train	455	CCCC(C)CC(C)(C)O	0.89
42.706	43.56	Train	435	CC(O)CC(C)C(C)C	0.854
42.659	43.99	Test	439.15	CC(O)CCC(C)(C)C	1.331
41.11	42.41	Train	423.85	CCC(C)CC(C)(C)O	1.3
42.036	43.35	Train	433	CCCC(C)(C)C(C)O	1.314
43.643	44.5	Train	444.15	CCC(C)C(C)C(C)O	0.857
42.517	43.37	Train	433.15	CC(C)CC(C)C(C)O	0.853
42.239	43.56	Train	435	CCC(C)(C)CC(C)O	1.321
42.062	43.38	Train	433.25	CCCC(C)C(C)(C)O	1.318
41.293	42.59	Train	425.65	CC(C)CCC(C)(C)O	1.297
32.682	32.85	Train	385.35	CC(C)=CCC(C)C	0.168
32.54	32.69	Train	383.75	CCC(C)C=C(C)C	0.15
33.575	33.84	Train	394.92	CCCC(C)=C(C)C	0.265
41.227	41.25	Train	469.35	Cc1ccc(C)c(C(C)C)c1	0.023
41.485	41.54	Train	472.15	Cc1cccc(C)c1C(C)C	0.055
48.423	48.37	Test	485	CC(C)CCCC(C)C(C)O	0.053
47.908	48.37	Train	485	CC(C)CCCCC(C)(C)O	0.462
47.908	48.37	Train	485	CCCCC(C)CC(C)(C)O	0.462
39.669	41.41	Train	412.15	CCC(C)C(C)(C)O	1.741
39.067	40.79	Train	406.15	CC(C)CC(C)(C)O	1.723
40.472	42.24	Train	420.15	CCC(C)(C)C(C)O	1.768
41.531	42.86	Train	426.15	CC(C)C(C)C(C)O	1.329
39.568	41.31	Train	411.15	CC(O)CC(C)(C)C	1.742
35.417	36.48	Train	403.75	CCC(C)(C)C(C)=O	1.063
35.911	36.62	Train	405.15	CC(=O)C(C)C(C)C	0.709
34.903	35.9	Train	398.15	CC(=O)CC(C)(C)C	0.997
31.219	31.46	Train	370.55	CCC(C)=C(C)C	0.241
29.937	30	Test	356.45	CC(C)=CC(C)C	0.063
29.387	29.97	Train	356.15	CC#CC(C)(C)C	0.583
47.755	48.36	Train	540.15	Cc1ccc(C)c(-c2ccccc2)c1	0.605
42.664	42.43	Train	480.75	CCCc1c(C)cccc1C	0.234
42.357	42.09	Train	477.45	CCCc1cc(C)ccc1C	0.267
44.598	46.41	Train	466	CC(C)C(C)(CO)C(C)(C)C	1.812
40.355	40.08	Train	463.15	CCC(CC)(CC(C)C)C(C)C	0.275
41.31	41.11	Train	473.15	CCC(C)C(CC)(CC)C(C)C	0.2
39.381	40.08	Train	462.15	CCC(CC)(C(C)C)C(C)C	0.699
38.999	40.08	Train	462.15	CCC(CC)(CC)C(C)(C)C	1.081
40.355	40.08	Train	463.15	CCC(CC)C(CC)C(C)(C)C	0.275
41.693	41.53	Train	477.15	CCC(CC)C(C)(CC)C(C)C	0.163
41.31	41.11	Train	473.15	CCC(C(C)C)C(C)(CC)CC	0.2
40.355	40.08	Train	463.15	CCC(C(C)C)C(CC)C(C)C	0.275
42.268	42.15	Train	483.15	CCC(C)(CC)C(C)(CC)CC	0.118
45.163	46.06	Test	461	CCC(CC)C(C)(C)CO	0.897
44.724	46.06	Train	461	CCC(C(C)O)C(C)(C)C	1.336
44.243	46.06	Train	461	CCC(C)(CC)C(C)(C)O	1.817
44.424	45.79	Train	460	CCC(O)(CC)CC(C)(C)C	1.366
41.884	41.73	Train	479.15	CCC(C(C)C)(C(C)C)C(C)C	0.154
42.857	44.63	Train	447.15	CCC(O)(CC)C(C)(C)C	1.773
43.718	45.03	Test	451.05	CCC(O)(C(C)C)C(C)C	1.312
34.427	34.76	Train	407.15	CCC1CCC(C)(C)C1	0.333
38.561	38.74	Train	449.15	CCCC(C)(C)C(CC)CC	0.179
39.218	39.05	Train	452.15	CCCC(C)C(CC)C(C)C	0.168
39.371	39.67	Test	458.15	CCCC(C)C(C)(CC)CC	0.299
38.921	39.15	Test	453.15	CCC(C)CC(C)(CC)CC	0.229
38.945	38.74	Train	449.15	CCC(CCC(C)C)C(C)C	0.205
38.945	38.74	Train	449.15	CCC(C)CC(CC)C(C)C	0.205
38.921	39.15	Train	453.15	CCCCC(C)(CC)C(C)C	0.229
38.561	38.74	Train	449.15	CCCCC(CC)C(C)(C)C	0.179
52.148	53.01	Test	585.41	CCc1cc2c(C)cccc2cc1C	0.862
41.31	41.11	Test	473.15	CCCCC(C)C(C)(CC)CC	0.2
40.928	40.7	Train	469.15	CCCCCC(CC)C(C)(C)C	0.228
41.502	41.32	Test	475.15	CCCCCC(C)(CC)C(C)C	0.182
41.215	41.01	Train	472.15	CCC(C)CCC(C)(CC)CC	0.205
41.119	40.91	Test	471.15	CCCCC(C)(C)C(CC)CC	0.209
41.215	41.01	Train	472.15	CCCC(C)C(C)C(CC)CC	0.205
40.737	40.49	Train	467.15	CCCC(C)CC(CC)C(C)C	0.247
40.928	40.7	Train	469.15	CCCC(C)CC(C)(CC)CC	0.228
41.024	40.8	Train	470.15	CCC(C)CCC(CC)C(C)C	0.224
41.024	40.8	Train	470.15	CCCCC(C)C(CC)C(C)C	0.224
40.928	40.7	Train	469.15	CCC(CCCC(C)C)C(C)C	0.228
34.37	34.61	Train	406.99	CCC(CC)C(C)(C)C	0.24
34.73	34.9	Train	409.87	CCC(C(C)C)C(C)C	0.17
35.31	35.73	Test	417.86	CCC(C)(CC)C(C)C	0.42
48.271	48.57	Test	515	CCc1c(C)ccc(O)c1C	0.299
46.804	47.02	Train	500	CCc1cc(C)cc(O)c1C	0.216
46.804	47.02	Train	500	CCc1ccc(C)c(O)c1C	0.216
44.142	45.03	Train	451	CCCCC(O)C(C)(C)C	0.888
43.749	44.63	Train	447.15	CCCCC(C)(O)C(C)C	0.881
44.332	44.73	Train	448.15	CC(C)CCC(O)C(C)C	0.398
44.04	44.92	Train	450	CCC(C)CC(C)(O)CC	0.88
44.04	44.92	Train	450	CCC(C)(O)CCC(C)C	0.88
42.092	42.94	Train	429	CCC(O)C(C)C(C)C	0.848
42.517	43.37	Train	433.15	CCC(C)C(O)C(C)C	0.853
42.414	43.26	Train	432.15	CC(C)CC(O)C(C)C	0.846
41.869	43.18	Train	431.35	CCCC(C)(O)C(C)C	1.311
41.343	42.65	Train	426.15	CCC(O)CC(C)(C)C	1.307
41.242	42.54	Train	425.15	CCC(C)(O)CC(C)C	1.298
41.657	42.97	Train	429.25	CCCC(O)C(C)(C)C	1.313
41.95	43.27	Train	432.15	CCC(O)C(C)(C)CC	1.32
41.242	42.54	Train	425.15	CCC(C)C(C)(O)CC	1.298
44.496	45.37	Test	456	CC(C)C(CCO)C(C)(C)C	0.874
44.025	45.37	Train	456	CC(C)C(C)(C(C)C)C(C)O	1.345
45.199	46.58	Train	467.65	CC(C)C(O)(C(C)C)C(C)C	1.381
41.816	41.92	Train	475.75	Cc1cccc(C(C)C)c1C	0.104
40.546	40.29	Train	465.15	CCCC(C)C(C(C)C)C(C)C	0.256
40.355	40.08	Test	463.15	CCCCC(C(C)C)C(C)(C)C	0.275
40.355	40.08	Train	463.15	CCC(C)CC(C(C)C)C(C)C	0.275
40.431	40.16	Train	463.95	CC(C)CCC(C(C)C)C(C)C	0.271
41.406	41.22	Train	474.15	CCCCC(C)(C(C)C)C(C)C	0.186
38.508	38.63	Train	448.15	CCC(C)C(C(C)C)C(C)C	0.122
37.863	38.32	Train	445.15	CCCC(C(C)C)C(C)(C)C	0.457
38.577	39.15	Test	453.15	CCCC(C)(C(C)C)C(C)C	0.573
38.058	38.12	Train	443.15	CC(C)CC(C(C)C)C(C)C	0.062
36.36	36.89	Test	430.2	CC(C)C(C(C)C)C(C)C	0.53
46.568	46.52	Train	467.15	CC(C)CCCC(O)C(C)C	0.048
45.569	46.02	Train	462.25	CCCCCC(C)(O)C(C)C	0.451
45.954	46.41	Train	466	CCCC(C)CC(C)(O)CC	0.456
46.057	46.51	Train	467	CCCCCC(O)C(C)(C)C	0.453
46.278	46.73	Train	469.15	CCC(C)(O)CCCC(C)C	0.452
45.867	46.32	Train	465.15	CCC(C)CCC(C)(O)CC	0.453
40.089	41.39	Train	411.95	CC(C)C(O)C(C)C	1.301
39.368	41.1	Train	409.15	CCC(O)C(C)(C)C	1.732
39.769	41.51	Train	413.15	CCC(C)(O)C(C)C	1.741
34.903	35.9	Train	398.15	CCC(=O)C(C)(C)C	0.997
35.97	35.84	Train	397.55	CC(C)C(=O)C(C)C	0.13
44.613	45.49	Train	457.15	CCCC(O)(C(C)C)C(C)C	0.877
42.952	42.75	Train	483.85	CCCc1cccc(C)c1C	0.202
40.928	40.7	Train	469.15	CCCC(C(C)(C)C)C(C)(C)C	0.228
41.31	41.11	Test	473.15	CCC(CC)(CC)CC(C)(C)C	0.2
41.693	41.53	Train	477.15	CCC(CC)(CC)C(C)C(C)C	0.163
42.268	42.15	Test	483.15	CCC(C)(C)C(CC)(CC)CC	0.118
44.918	45.8	Train	460.15	CCC(CC)C(O)C(C)(C)C	0.882
44.903	45.79	Test	460	CCC(C)(CC)C(O)C(C)C	0.887
39.4	39.25	Train	454.15	CCC(C)C(CC)C(C)CC	0.15
39.218	39.05	Train	452.15	CCCC(CC)C(C)C(C)C	0.168
38.021	38.12	Train	443.15	CCCC(C)(CC)CC(C)C	0.099
38.854	38.63	Train	448.15	CCC(C)C(CC)CC(C)C	0.224
38.4	38.12	Test	443.15	CCC(CC(C)C)CC(C)C	0.28
38.921	39.15	Train	453.15	CCCC(CC)C(C)(C)CC	0.229
39.011	39.25	Test	454.15	CCCC(C)(CC)C(C)CC	0.239
37.841	37.91	Train	441.15	CCCC(CC)CC(C)(C)C	0.069
52.148	53.01	Test	585.41	CCc1cc(C)c(C)c2ccccc12	0.862
40.546	40.29	Train	465.15	CCCC(C)C(CC)CC(C)C	0.256
40.451	40.18	Train	464.15	CCCCC(C)(CC)CC(C)C	0.271
40.355	40.08	Train	463.15	CCC(C)CC(CC)CC(C)C	0.275
41.024	40.8	Train	470.15	CCCCC(CC)C(C)C(C)C	0.224
40.355	40.08	Train	463.15	CCC(CCC(C)C)CC(C)C	0.275
40.928	40.7	Test	469.15	CCC(C)CC(CC)C(C)CC	0.228
41.31	41.11	Train	473.15	CCCC(C)C(C)(CC)CCC	0.2
41.406	41.22	Test	474.15	CCCCC(C)(CC)C(C)CC	0.186
41.024	40.8	Train	470.15	CCCC(C)C(CC)C(C)CC	0.224
40.069	39.77	Train	460.15	CCCCC(CC)CC(C)(C)C	0.299
41.119	40.91	Train	471.15	CCCCC(CC)C(C)(C)CC	0.209
49.951	50.34	Train	532.15	CCc1c(C)cc(O)cc1C	0.389
46.916	47.14	Train	501.15	CCc1cc(C)c(O)c(C)c1	0.224
47.782	48.05	Train	510	CCc1ccc(O)c(C)c1C	0.268
46.804	47.02	Train	500	CCc1cc(C)c(O)cc1C	0.216
43.749	44.63	Train	447.15	CCCC(O)CC(C)(C)C	0.881
43.484	44.36	Train	444.55	CCCC(C)(O)CC(C)C	0.876
43.953	44.83	Train	449.15	CCCC(O)C(C)(C)CC	0.877
45.569	45.97	Train	460.15	CCC(C)C(O)C(C)CC	0.401
45.66	45.02	Test	451	CC(C)CC(O)CC(C)C	0.64
41.742	41.83	Train	474.95	Cc1ccc(C(C)C)cc1C	0.088
41.494	41.55	Train	472.25	Cc1ccc(C(C)C)c(C)c1	0.056
40.737	40.49	Test	467.15	CCC(C)C(C(C)C)C(C)CC	0.247
40.546	40.29	Train	465.15	CCCC(C(C)C)C(C)C(C)C	0.256
40.546	40.29	Train	465.15	CCCC(C)(CC(C)C)C(C)C	0.256
40.26	39.98	Train	462.15	CCC(C)C(CC(C)C)C(C)C	0.28
40.737	40.49	Train	467.15	CCCC(C(C)C)C(C)(C)CC	0.247
39.687	39.36	Train	456.15	CC(C)CC(CC(C)C)C(C)C	0.327
41.406	41.22	Test	474.15	CCCC(C)(C(C)C)C(C)CC	0.186
39.592	39.25	Train	455.15	CCCC(CC(C)(C)C)C(C)C	0.342
45.748	46.2	Test	464	CCCCC(C)(O)CC(C)C	0.452
46.241	46.2	Train	464	CCCC(C)C(O)CC(C)C	0.041
46.241	46.2	Train	464	CCC(C)CC(O)CC(C)C	0.041
45.748	46.2	Test	464	CCCCC(C)(O)C(C)CC	0.452
46.241	46.2	Train	464	CCC(C)CC(O)C(C)CC	0.041
45.748	46.2	Train	464	CCCC(C)(O)CC(C)CC	0.452
45.867	46.32	Train	465.15	CCCC(C)(O)CCC(C)C	0.453
45.661	46.11	Train	463.15	CCCCC(O)CC(C)(C)C	0.449
46.241	46.2	Train	464	CC(C)CCC(O)CC(C)C	0.041
48.045	48.67	Train	543.15	Cc1ccc(-c2ccccc2)c(C)c1	0.625
42.571	42.33	Train	479.75	CCCc1ccc(C)cc1C	0.241
42.785	42.57	Train	482.05	CCCc1ccc(C)c(C)c1	0.215
40.928	40.7	Train	469.15	CCCC(CCC)C(C)(C)CC	0.228
40.355	40.08	Train	463.15	CCCC(CC(C)C)C(C)CC	0.275
40.737	40.49	Train	467.15	CCCC(CCC)C(C)C(C)C	0.247
39.783	39.46	Train	457.15	CCCC(CCC)CC(C)(C)C	0.323
39.84	39.52	Train	457.75	CCCC(CC(C)C)CC(C)C	0.32
41.119	40.91	Train	471.15	CCCC(C)(CCC)C(C)CC	0.209
40.928	40.7	Train	469.15	CCCC(C(C)CC)C(C)CC	0.228
40.26	39.98	Test	462.15	CCCC(C)(CCC)CC(C)C	0.28
38.201	38.32	Test	445.15	CCC(CC)CCC(C)(C)C	0.119
39.127	38.94	Test	451.15	CCC(CC)CC(C)C(C)C	0.187
38.945	38.74	Train	449.15	CCC(CC)C(C)CC(C)C	0.205
38.741	38.94	Train	451.15	CCC(C)(CC)CCC(C)C	0.199
38.471	38.63	Test	448.15	CCC(CC)CC(C)(C)CC	0.159
39.491	39.36	Train	455.15	CCC(C)C(C)C(CC)CC	0.131
52.148	53.01	Train	585.41	CCc1cccc2c(C)cc(C)cc12	0.862
52.148	53.01	Train	585.41	CCc1cccc2c(C)ccc(C)c12	0.862
40.355	40.08	Train	463.15	CCCC(C)(CC)CC(C)CC	0.275
40.928	40.7	Train	469.15	CCCC(CC)C(C)(C)CCC	0.228
40.451	40.18	Train	464.15	CCCC(CC)CC(C)(C)CC	0.271
40.641	40.39	Train	466.15	CCCC(C)(CC)CCC(C)C	0.251
40.26	39.98	Train	462.15	CCCC(CC)CCC(C)(C)C	0.28
40.737	40.49	Test	467.15	CCCC(CC)CC(C)C(C)C	0.247
40.833	40.6	Train	468.15	CCC(C)C(CC)CCC(C)C	0.233
40.641	40.39	Train	466.15	CCCC(CC)C(C)CC(C)C	0.251
41.119	40.91	Train	471.15	CCCC(CC)C(C)C(C)CC	0.209
48.286	48.58	Train	515.15	CCc1cc(O)c(C)cc1C	0.294
48.286	48.58	Test	515.15	CCc1cc(O)cc(C)c1C	0.294
47.782	48.05	Train	510	CCc1cc(C)c(C)c(O)c1	0.268
41.071	41.08	Train	467.65	Cc1cc(C)cc(C(C)C)c1	0.009
48.529	49.19	Train	548.15	Cc1cc(C)cc(-c2ccccc2)c1	0.661
42.166	41.88	Train	475.39	CCCc1cc(C)cc(C)c1	0.286
52.148	53.01	Train	585.41	CCc1ccc2c(C)cc(C)cc2c1	0.862
52.148	53.01	Train	585.41	CCc1ccc2c(C)ccc(C)c2c1	0.862
40.928	40.7	Train	469.15	CCC(CC)CCC(C)(C)CC	0.228
40.546	40.29	Train	465.15	CCC(CC)CC(C)CC(C)C	0.256
41.119	40.91	Train	471.15	CCC(CC)CC(C)C(C)CC	0.209
40.451	40.18	Test	464.15	CCCC(C)(C)CC(CC)CC	0.271
41.024	40.8	Train	470.15	CCC(C)CC(C)C(CC)CC	0.224
40.641	40.39	Train	466.15	CCC(CC)CCCC(C)(C)C	0.251
41.024	40.8	Train	470.15	CCC(CC)C(C)CCC(C)C	0.224
41.119	40.91	Train	471.15	CCC(C)(CC)CCCC(C)C	0.209
41.215	41.01	Train	472.15	CCC(CC)CCC(C)C(C)C	0.205
46.819	47.03	Train	500.15	CCc1cc(C)cc(C)c1O	0.211
46.804	47.02	Test	500	CCc1c(C)ccc(C)c1O	0.216
48.271	48.57	Train	515	CCc1cc(C)c(C)cc1O	0.299
47.782	48.05	Test	510	CCc1ccc(C)c(C)c1O	0.268
52.148	53.01	Train	585.41	CCc1ccc2ccc(C)c(C)c2c1	0.862
26.43	24.7	Train	300.13	CC#CC	1.73
47.368	47.95	Test	536.15	Cc1cccc(C)c1-c1ccccc1	0.582
49.207	49.91	Test	555.15	Cc1ccc(-c2ccccc2)cc1C	0.703
46.885	47.43	Train	531.15	Cc1ccccc1-c1ccccc1C	0.545
48.82	49.5	Test	551.15	Cc1cccc(-c2ccccc2)c1C	0.68
50.275	51.05	Train	566.15	Cc1ccc(-c2ccc(C)cc2)cc1	0.775
49.304	50.01	Train	556.15	Cc1ccc(-c2cccc(C)c2)cc1	0.706
49.595	50.32	Test	559.15	Cc1cccc(-c2cccc(C)c2)c1	0.725
34.28	34.83	Train	386.15	CC(C)C(C)C=O	0.55
33.102	33.9	Test	377.15	CCC(C)(C)C=O	0.798
33.102	33.9	Train	377.15	CC(C)(C)CC=O	0.798
27.49	27.17	Test	331.13	CC(C)C(C)C	0.32
26.42	26.32	Train	322.88	CCC(C)(C)C	0.1
35.222	35.79	Train	417.15	CCC1C(C)CCC1C	0.568
35.931	36.62	Train	425.15	CCC1C(C)CCC1C	0.689
31.857	32.31	Train	380.05	CC=CCC(C)(C)C	0.453
33.02	33.25	Train	389.15	CC=C(C)C(C)CC	0.23
32.664	32.83	Test	385.15	CC=C(C)CC(C)C	0.166
32.446	32.63	Train	383.15	CC=CC(C)C(C)C	0.184
31.778	32.21	Train	379.15	CC=CC(C)(C)CC	0.432
30.462	30.61	Train	362.4	CC=C(C)C(C)C	0.148
29.423	29.7	Test	353.58	CC=CC(C)(C)C	0.277
35.931	36.62	Train	425.15	CCC1CCC(C)C1C	0.689
34.691	35.17	Train	411.15	CCC1CCC(C)C1C	0.479
33.596	33.87	Train	395.15	CCC(C)=C(C)CC	0.274
31.736	31.8	Train	375.15	CC(C)C=CC(C)C	0.064
32.397	32.52	Test	382.15	CCC(C)=CC(C)C	0.123
32.842	33.04	Test	387.15	CCC=C(C)C(C)C	0.198
31.727	32.15	Test	378.58	CCC=CC(C)(C)C	0.423
35.488	36.1	Train	420.15	CCC1CC(C)C(C)C1	0.612
39.397	40.64	Train	464.15	CCC1CC(C)CC1C	1.243
35.311	35.89	Train	418.15	CCC1CC(C)CC1C	0.579
34.868	35.38	Train	413.15	CCC1CC(C)C(C)C1	0.512
43.226	43.31	Train	493.15	CC1CCCC2(C)CCCCC12	0.084
27.86	27.51	Train	333.15	CC1CCC1C	0.35
27.604	27.1	Train	329.15	CC1(C)CCC1	0.504
28.563	28.34	Test	341.15	CC1CCC1C	0.223
27.904	27.56	Train	333.65	CC1CC(C)C1	0.344
27.64	27.25	Train	330.65	CC1CC(C)C1	0.39
33.14	33.88	Train	397.47	CC1CCC(C)CC1	0.74
32.44	33.39	Test	392.7	CC1(C)CCCCC1	0.95
33.54	34.44	Train	402.94	CC1CCCCC1C	0.9
32.87	33.79	Train	396.58	CC1CCCCC1C	0.92
33.25	33.89	Train	397.61	CC1CCCC(C)C1	0.64
32.48	33.37	Train	392.51	CC1CCC(C)CC1	0.89
32.72	33.44	Train	393.24	CC1CCCC(C)C1	0.72
33.837	34.62	Train	401.15	CC1=CCCC(C)C1	0.783
33.364	34.07	Train	395.8	CC1C=CC(C)CC1	0.706
33.757	34.53	Test	400.25	CC1=CC(C)CCC1	0.773
33.837	34.62	Train	401.15	CC1=CCC(C)CC1	0.783
34.112	34.94	Train	404.25	CC1=CCCCC1C	0.828
33.142	33.69	Train	392.15	CC1(C)C=CCCC1	0.548
33.364	34.07	Train	395.8	CC1C=CCCC1C	0.706
33.364	34.07	Train	395.8	CC1C=CCCC1C	0.706
33.364	34.07	Train	395.8	CC1C=CCC(C)C1	0.706
33.364	34.07	Train	395.8	CC1C=CCC(C)C1	0.706
34.721	35.65	Train	411.13	CC1=C(C)CCCC1	0.929
33.364	34.07	Train	395.8	CC1C=CC(C)CC1	0.706
32.986	33.51	Train	390.39	CC1(C)CC=CCC1	0.524
33.82	34.6	Train	400.96	CC1CC=CCC1C	0.78
33.364	34.07	Train	395.8	CC1CC=CCC1C	0.706
31.71	31.45	Train	372.68	CC1CCCC1C	0.26
30.75	30.54	Train	363.92	CC1CCC(C)C1	0.21
31.37	30.64	Train	364.88	CC1CCC(C)C1	0.73
31.2	30.66	Test	365.02	CC1CCCC1C	0.54
30.64	30.24	Train	361	CC1(C)CCCC1	0.4
31.93	32.46	Train	378.95	CC1=C(C)CCC1	0.53
30.658	30.97	Train	364.55	CC1C=CC(C)C1	0.312
30.658	30.97	Train	364.55	CC1C=CCC1C	0.312
30.658	30.97	Test	364.55	CC1C=CCC1C	0.312
30.658	30.97	Train	364.55	CC1C=CC(C)C1	0.312
30.459	30.62	Train	361.15	CC1(C)CC=CC1	0.161
30.711	31.03	Test	365.15	CC1=CC(C)CC1	0.319
30.817	31.16	Test	366.35	CC1=CCC(C)C1	0.343
30.459	30.62	Train	361.15	CC1(C)C=CCC1	0.161
31.595	32.06	Train	375.15	CC1=CCCC1C	0.465
24.557	23.61	Train	293.78	CC1(C)CC1	0.947
25.173	24.4	Train	301.36	CC1CC1C	0.773
25.947	25.31	Test	310.18	CC1CC1C	0.637
41.119	40.91	Train	471.15	CCCCC(C)CC(C)CCC	0.209
41.215	41.01	Train	472.15	CCCC(C)CCC(C)CCC	0.205
41.024	40.8	Test	470.15	CCCCCC(C)(C)CCCC	0.224
41.693	41.53	Train	477.15	CC(C)CCCCCCC(C)C	0.163
41.406	41.22	Test	474.15	CCCCCCCCC(C)(C)C	0.186
41.884	41.73	Train	479.15	CCCCCCCC(C)C(C)C	0.154
41.406	41.22	Train	474.15	CCCCC(C)C(C)CCCC	0.186
41.119	40.91	Train	471.15	CCCCCC(C)CCC(C)C	0.209
41.119	40.91	Test	471.15	CCCCC(C)CCCC(C)C	0.209
41.31	41.11	Train	473.15	CCCCCCC(C)CC(C)C	0.2
41.693	41.53	Test	477.15	CCC(C)CCCCCC(C)C	0.163
41.502	41.32	Train	475.15	CCCCCC(C)C(C)CCC	0.182
41.597	41.42	Train	476.15	CCCCCCCC(C)(C)CC	0.177
41.789	41.63	Test	478.15	CCCCCCC(C)C(C)CC	0.159
41.31	41.11	Test	473.15	CCCCCC(C)CC(C)CC	0.2
41.406	41.22	Train	474.15	CCCCC(C)CCC(C)CC	0.186
41.502	41.32	Train	475.15	CCCC(C)CCCC(C)CC	0.182
41.789	41.63	Train	478.15	CCC(C)CCCCC(C)CC	0.159
41.215	41.01	Train	472.15	CCCCCCC(C)(C)CCC	0.205
41.502	41.32	Train	475.15	CCCC(C)CCCCC(C)C	0.182
50.372	51.06	Train	567.15	Cc1cc(C)cc(Cc2ccccc2)c1	0.688
50.663	51.37	Train	570.15	Cc1cccc(Cc2ccccc2)c1C	0.707
50.566	51.26	Test	569.15	Cc1ccc(Cc2ccccc2)c(C)c1	0.694
50.469	51.16	Train	568.15	Cc1ccc(C)c(Cc2ccccc2)c1	0.691
50.761	51.47	Test	571.15	Cc1ccc(Cc2ccccc2)cc1C	0.709
50.663	51.37	Train	570.15	Cc1cccc(C)c1Cc1ccccc1	0.707
45.149	45.05	Train	513.15	CCCCCCCCCCC(C)(C)C	0.099
44.572	44.43	Train	507.15	CCCCCCCCC(C)CC(C)C	0.142
45.824	45.78	Test	520.15	CCCCCCCCCC(C)C(C)C	0.044
32.309	33.09	Train	367.65	Cc1ccoc1C	0.781
32.171	32.93	Test	366.15	Cc1ccc(C)o1	0.759
30.84	31.43	Train	351.67	Cc1cocc1C	0.59
32.355	33.14	Train	368.15	Cc1coc(C)c1	0.785
52.805	52.78	Test	592.15	CCCCCCCCCCCCCCCC(C)(C)C	0.025
51.733	51.65	Train	581.15	CCCCCCCCCCCCCC(C)CC(C)C	0.083
53.585	53.61	Test	600.15	CCCCCCCCCCCCCCC(C)C(C)C	0.025
35.61	34.83	Train	409.16	CCC(C)CCC(C)C	0.78
35.38	34.75	Train	408.36	CC(C)CCCC(C)C	0.63
36.36	35.3	Train	413.76	CCCC(C)C(C)CC	1.06
35.65	34.83	Train	409.16	CCC(C)CC(C)CC	0.82
36.11	35.29	Train	413.66	CCCCC(C)C(C)C	0.82
35.36	34.51	Train	406.05	CCCC(C)CC(C)C	0.85
35.36	34.75	Train	408.36	CCCC(C)(C)CCC	0.61
35.04	34.49	Train	405.84	CCCCCC(C)(C)C	0.55
51.441	51.42	Train	578.15	CCCCCCCCCCCCCCC(C)(C)C	0.021
52.22	52.24	Train	586.15	CCCCCCCCCCCCCC(C)C(C)C	0.02
50.469	50.38	Train	568.15	CCCCCCCCCCCCC(C)CC(C)C	0.089
33.31	33.06	Train	390.88	CCC(C)C(C)CC	0.25
32.64	32.47	Train	385.12	CCCC(C)(C)CC	0.17
32.73	32.17	Train	382.26	CC(C)CCC(C)C	0.56
32.37	31.94	Test	379.99	CCCCC(C)(C)C	0.43
33.18	32.84	Train	388.76	CCCC(C)C(C)C	0.34
32.48	32.21	Train	382.58	CCC(C)CC(C)C	0.27
49.9	48.32	Train	538.16	Cc1cccc2c(C)cccc12	1.58
48.82	48.11	Train	536.15	Cc1ccc2ccc(C)cc2c1	0.71
48.75	48.01	Train	535.15	Cc1ccc2cc(C)ccc2c1	0.74
50.18	48.63	Train	541.16	Cc1cc2ccccc2cc1C	1.55
48.045	48.84	Train	543.15	Cc1cccc2cccc(C)c12	0.795
49.71	48.11	Train	536.16	Cc1ccc2c(C)cccc2c1	1.6
50.12	48.56	Train	540.46	Cc1ccc(C)c2ccccc12	1.56
49.92	48.34	Test	538.36	Cc1cc(C)c2ccccc2c1	1.58
49.71	48.11	Train	536.16	Cc1ccc2cccc(C)c2c1	1.6
50.21	48.45	Train	539.46	Cc1ccc2ccccc2c1C	1.76
39.089	38.94	Test	451.15	CCCCCC(C)(C)CCC	0.149
39.573	39.05	Train	452.15	CCCCC(C)CCC(C)C	0.523
40.123	39.67	Train	458.15	CCCCCC(C)C(C)CC	0.453
39.664	39.15	Train	453.15	CCCCC(C)CC(C)CC	0.514
39.848	39.36	Train	455.15	CCCC(C)CCC(C)CC	0.488
39.573	39.05	Train	452.15	CCCC(C)CCCC(C)C	0.523
39.452	39.36	Train	455.15	CCCCCCC(C)(C)CC	0.092
40.031	39.56	Test	457.15	CCC(C)CCCC(C)CC	0.471
39.481	38.94	Train	451.15	CCCCCC(C)CC(C)C	0.541
40.215	39.77	Test	459.15	CCCCCCC(C)C(C)C	0.445
39.27	39.15	Train	453.15	CCCCCCCC(C)(C)C	0.12
39.848	39.36	Test	455.15	CCCCC(C)C(C)CCC	0.488
39.573	39.05	Train	452.15	CCCC(C)CC(C)CCC	0.523
38.998	38.84	Test	450.15	CCCCC(C)(C)CCCC	0.158
39.664	39.15	Train	453.15	CCC(C)CCCCC(C)C	0.514
39.939	39.46	Test	456.15	CC(C)CCCCCC(C)C	0.479
53	52.91	Train	594.15	CCCCCCCCCCCCCCC(C)CC(C)C	0.09
54.953	54.98	Train	614.15	CCCCCCCCCCCCCCCC(C)C(C)C	0.027
54.171	54.15	Train	606.15	CCCCCCCCCCCCCCCCC(C)(C)C	0.021
37.61	37.32	Test	434.36	CCCCCC(C)(C)CC	0.29
37.87	37.41	Train	435.29	CCCC(C)C(C)CCC	0.46
38.07	37.28	Train	433.96	CCC(C)CCC(C)CC	0.79
37.74	37.13	Test	432.56	CCCC(C)CC(C)CC	0.61
37.24	36.94	Train	430.66	CCCCC(C)(C)CCC	0.3
38.03	37.55	Train	436.56	CCCCC(C)C(C)CC	0.48
38.24	37.18	Train	433.03	CC(C)CCCCC(C)C	1.06
38.2	37.23	Train	433.54	CCC(C)CCCC(C)C	0.97
37.82	37.04	Train	431.66	CCCC(C)CCC(C)C	0.78
38.2	37.64	Train	437.47	CCCCCC(C)C(C)C	0.56
37.15	36.87	Train	430.05	CCCCCCC(C)(C)C	0.28
37.82	36.77	Train	429.06	CCCCC(C)CC(C)C	1.05
50.761	50.78	Test	571.15	CCCCCCCCCCCCC(C)C(C)C	0.019
49.111	49.02	Train	554.15	CCCCCCCCCCCC(C)CC(C)C	0.091
49.984	49.95	Train	563.15	CCCCCCCCCCCCCC(C)(C)C	0.034
29.74	29.92	Train	359.21	CCC(C)(C)CC	0.18
29.26	29.21	Train	352.34	CCCC(C)(C)C	0.05
29.8	29.35	Train	353.64	CC(C)CC(C)C	0.45
30.49	30.31	Train	362.93	CCC(C)C(C)C	0.18
30.183	30.99	Test	347.15	CC(C)(C)C=O	0.807
41.085	45.72	Train	436.95	CC(C)(C)C(=O)O	4.635
35.561	37.5	Train	401.65	CC(=O)OC(C)C(C)C	1.939
46.815	43.48	Train	462.66	CCCC(=O)OC(C)C(C)C	3.335
47.111	43.23	Train	460.31	CCCC(=O)OC(C)(C)CC	3.881
45.741	43.24	Test	460.31	CCCC(=O)OCC(C)(C)C	2.501
33.771	36.57	Train	390.97	CC(C)(C)COC=O	2.799
34.794	36.81	Train	393.32	CC(C)C(C)OC=O	2.016
33.488	36.02	Train	385.65	CCC(C)(C)OC=O	2.532
42.772	41.02	Train	437.43	CCC(=O)OC(C)(C)CC	1.752
42.797	41.26	Train	439.78	CCC(=O)OC(C)C(C)C	1.537
41.622	41.02	Train	437.43	CCC(=O)OCC(C)(C)C	0.602
40.853	41	Train	465.57	C=Cc1ccc(C)cc1C	0.147
40.853	41	Test	465.57	C=Cc1cccc(C)c1C	0.147
40.853	41	Test	465.57	C=Cc1c(C)cccc1C	0.147
40.853	41	Test	465.57	C=Cc1cc(C)cc(C)c1	0.147
40.853	41	Train	465.57	C=Cc1cc(C)ccc1C	0.147
40.853	41	Test	465.57	C=Cc1ccc(C)c(C)c1	0.147
48.432	48.39	Train	547.15	CCCCCCCCCCCCC(C)(C)C	0.042
47.658	47.56	Train	539.15	CCCCCCCCCCC(C)CC(C)C	0.098
49.207	49.21	Train	555.15	CCCCCCCCCCCC(C)C(C)C	0.003
31.97	33.47	Train	372.15	CC1(C)CCOC1	1.5
32.713	34.44	Test	381.65	CC1COCC1C	1.727
31.357	32.76	Train	365.35	CC1(C)CCCO1	1.403
31.666	33.24	Train	370	CC1CCOC1C	1.574
31.734	33.32	Train	370.75	CC1COC(C)C1	1.586
31.276	32.79	Train	365.65	CC1CCC(C)O1	1.514
34.602	35.07	Train	410.15	CCC1C(C)CCC1C	0.468
33.02	33.25	Train	389.15	CC=C(C)C(C)CC	0.23
32.446	32.63	Train	383.15	CC=CC(C)C(C)C	0.184
31.778	32.21	Test	379.15	CC=CC(C)(C)CC	0.432
32.664	32.83	Test	385.15	CC=C(C)CC(C)C	0.166
31.61	32.02	Train	377.25	CC=CCC(C)(C)C	0.41
29.04	29.32	Train	349.89	CC=CC(C)(C)C	0.28
30.66	30.85	Train	364.65	CC=C(C)C(C)C	0.19
35.311	35.89	Train	418.15	CCC1CCC(C)C1C	0.579
35.311	35.89	Train	418.15	CCC1CCC(C)C1C	0.579
31.325	31.68	Train	374	CCC=CC(C)(C)C	0.355
32.273	32.38	Train	380.75	CCC(C)=CC(C)C	0.107
31.736	31.8	Test	375.15	CC(C)C=CC(C)C	0.064
32.842	33.04	Train	387.15	CCC=C(C)C(C)C	0.198
33.596	33.87	Train	395.15	CCC(C)=C(C)CC	0.274
35.488	36.1	Train	420.15	CCC1CC(C)C(C)C1	0.612
34.602	35.07	Train	410.15	CCC1CC(C)CC1C	0.468
35.311	35.89	Test	418.15	CCC1CC(C)CC1C	0.579
42.555	42.59	Train	486.15	CC1CCCC2(C)CCCCC12	0.035
47.561	47.54	Train	538.15	CCCCCCCCCCC(C)C(C)C	0.021
46.788	46.72	Train	530.15	CCCCCCCCCCCC(C)(C)C	0.068
46.209	46.1	Train	524.15	CCCCCCCCCC(C)CC(C)C	0.109
42.843	42.67	Train	489.15	CCCCCCCC(C)CC(C)C	0.173
43.322	43.18	Train	494.15	CCCCCCCCCC(C)(C)C	0.142
43.995	43.91	Train	501.15	CCCCCCCCC(C)C(C)C	0.085
47.908	48.37	Test	485	CCC(C)CCCC(C)(C)O	0.462
52.693	54.24	Test	591	CCCCCCCCCOCCCCCCCCC	1.547
73.97	65.07	Train	722	CCCCCCCCCc1cccc(O)c1CCCCCCCCC	8.9
56.72	51.18	Test	559.65	CCCCCCCCOCCCCCCCC	5.54
66.13	66.46	Train	657.15	CCCCCCCCOC(=O)c1ccccc1C(=O)OCCCCCCCC	0.33
34.3	35.66	Train	374.47	C1COCCO1	1.36
41.67	41.82	Test	459.9	CCCCCOCCCCC	0.15
46.87	49	Train	531.46	c1ccc(Oc2ccccc2)cc1	2.13
50.44	51.07	Train	567.85	CCC=C(c1ccccc1)c1ccccc1	0.63
58.973	59.29	Test	655.15	CCCCCCCCC=C(c1ccccc1)c1ccccc1	0.317
61.14	61.42	Train	677.15	CCCCCCCCCCC=C(c1ccccc1)c1ccccc1	0.28
54.855	55.5	Train	613.15	CCCCCC=C(c1ccccc1)c1ccccc1	0.645
64.697	64.85	Train	713.15	CCCCCCCCCCCCCCC=C(c1ccccc1)c1ccccc1	0.153
53.078	53.7	Train	594.95	CCCCC=C(c1ccccc1)c1ccccc1	0.622
57.696	58.03	Train	642.15	CCCCCCCC=C(c1ccccc1)c1ccccc1	0.334
56.421	57.07	Train	629.15	CCCCCCC=C(c1ccccc1)c1ccccc1	0.649
63.905	64.1	Train	705.15	CCCCCCCCCCCCCC=C(c1ccccc1)c1ccccc1	0.195
51.807	52.44	Train	581.91	CCCC=C(c1ccccc1)c1ccccc1	0.633
49.886	50.57	Test	562.15	CC=C(c1ccccc1)c1ccccc1	0.684
63.015	63.24	Train	696.15	CCCCCCCCCCCCC=C(c1ccccc1)c1ccccc1	0.225
62.126	62.38	Train	687.15	CCCCCCCCCCCC=C(c1ccccc1)c1ccccc1	0.254
60.056	60.35	Train	666.15	CCCCCCCCCC=C(c1ccccc1)c1ccccc1	0.294
50.94	51.78	Train	573	C(#Cc1ccccc1)c1ccccc1	0.84
49.43	49.97	Train	557.44	CCCC(c1ccccc1)c1ccccc1	0.54
56.911	57.1	Train	634.15	CCCCCCCCCC(c1ccccc1)c1ccccc1	0.189
59.367	59.53	Train	659.15	CCCCCCCCCCCC(c1ccccc1)c1ccccc1	0.163
50.4	48.94	Train	545.78	CC(c1ccccc1)c1ccccc1	1.46
50.94	49.75	Train	553.65	c1ccc(CCc2ccccc2)cc1	1.19
48.733	49.43	Train	550.25	C=C(c1ccccc1)c1ccccc1	0.697
54.269	54.85	Train	607.15	CCCCCCC(c1ccccc1)c1ccccc1	0.581
62.521	62.55	Train	691.15	CCCCCCCCCCCCCCCC(c1ccccc1)c1ccccc1	0.029
53.003	53.59	Train	594.18	CCCCCC(c1ccccc1)c1ccccc1	0.587
49.94	48.17	Train	537.42	c1ccc(Cc2ccccc2)cc1	1.77
56.519	56.76	Train	630.15	CCCCCCCCC(c1ccccc1)c1ccccc1	0.241
55.442	55.7	Train	619.15	CCCCCCCC(c1ccccc1)c1ccccc1	0.258
61.83	61.9	Train	684.15	CCCCCCCCCCCCCCC(c1ccccc1)c1ccccc1	0.07
51.723	52.32	Train	581.04	CCCCC(c1ccccc1)c1ccccc1	0.597
49.326	49.94	Train	556.37	CCC(c1ccccc1)c1ccccc1	0.614
49.368	49.99	Train	556.81	CC(Cc1ccccc1)c1ccccc1	0.622
50.829	51.54	Train	571.85	c1ccc(CCCc2ccccc2)cc1	0.711
49.129	49.74	Train	554.34	CC(C)(c1ccccc1)c1ccccc1	0.611
61.041	61.14	Train	676.15	CCCCCCCCCCCCCC(c1ccccc1)c1ccccc1	0.099
60.253	60.39	Test	668.15	CCCCCCCCCCCCC(c1ccccc1)c1ccccc1	0.137
58.482	58.67	Train	650.15	CCCCCCCCCCC(c1ccccc1)c1ccccc1	0.188
32.21	32.36	Train	362.79	CCCOCCC	0.15
62.21	58.51	Test	504.95	CC(O)COC(C)CO	3.7
34.3	35.29	Train	394.2	CCC(C)OC(C)CC	0.99
33.58	35.48	Train	384.15	CC(C)(C)OOC(C)(C)C	1.9
32.19	33.87	Train	380.4	CC(C)(C)OC(C)(C)C	1.68
52.72	50.26	Train	538	Cc1cc(C(C)(C)C)c(O)c(C(C)(C)C)c1	2.46
26.76	26.53	Train	301.45	C=COC=C	0.23
41.95	41.76	Train	472.65	C=Cc1cccc(C=C)c1	0.19
57.402	57.63	Train	496.94	CC(CO)C(C)CO	0.228
51.742	52.73	Train	453.85	CC(O)C(C)O	0.988
59.008	57.19	Train	508.21	CC(CO)CC(C)CO	1.818
54.413	54.37	Train	474.15	CC(O)CC(C)O	0.043
39.14	39.43	Test	449.65	C=C(C)C1CC=C(C)CC1	0.29
57.657	57.67	Test	641.75	CCCCCCCCCCCCCCCCCCCCCC	0.013
57.5	57.56	Train	640.15	C=CCCCCCCCCCCCCCCCCCCCC	0.06
64.499	64.53	Train	711.15	CCCCCCCCCCCCCCCCCCCCCCc1ccccc1	0.031
64.796	64.86	Test	714.15	CCCCCCCCCCCCCCCCCCCCCCC1CCCCC1	0.064
63.708	63.79	Test	703.15	CCCCCCCCCCCCCCCCCCCCCCC1CCCC1	0.082
57.402	57.45	Train	639.15	C#CCCCCCCCCCCCCCCCCCCCC	0.048
50.35	44.88	Train	523.15	CCCCCCCCCCCC=O	5.47
44.34	42.8	Train	489.47	CCCCCCCCCCCC	1.54
53.585	62.66	Test	600.15	OCCCCCCCCCCCCO	9.075
51.733	60.47	Train	581.15	CCCCCCCCCCC(O)CO	8.737
52.805	61.61	Train	592.15	CCCCCCCCCC(O)CCO	8.805
62.19	54.95	Train	571.85	CCCCCCCCCCCC(=O)O	7.24
54.5	49.95	Train	535	CCCCCCCCCCCCO	4.55
46.306	49	Train	525.15	CCCCCCCCCCC(C)O	2.694
45.795	44.57	Train	519.85	CCCCCCCCCCC(C)=O	1.225
43.7	42.54	Train	486.5	C=CCCCCCCCCCC	1.16
51.421	51.55	Test	577.94	CCCCCCCCCCCCOC(C)=O	0.129
55.887	56.08	Train	623.7	CCCCCCCCCCCCOC(=O)CCC	0.193
49.131	49.22	Train	554.36	CCCCCCCCCCCCOC=O	0.089
53.65	53.81	Train	600.82	CCCCCCCCCCCCOC(=O)CC	0.16
56.8	53.87	Train	600.76	CCCCCCCCCCCCc1ccccc1	2.93
53.56	53.9	Train	600.86	CCCCCCCCCCCCC1CCCCC1	0.34
52.59	52.25	Train	584.06	CCCCCCCCCCCCC1CCCC1	0.34
50.761	50.96	Train	571.15	CCCCCCCCCCCCC1=CCCC1	0.199
61.041	61.41	Train	676.15	CCCCCCCCCCCCc1cccc2ccccc12	0.369
61.633	62.03	Train	682.15	CCCCCCCCCCCCc1ccc2ccccc2c1	0.397
43.169	43.17	Train	492.55	CCC#CCCCCCCCC	0.001
43.802	43.85	Train	499.15	CC#CCCCCCCCCC	0.048
44.38	42.71	Train	488.16	C#CCCCCCCCCCC	1.67
83.506	82.1	Train	901.15	CCCCCCCCCCCCCCCCCCCCCCCCCCCCCCCCCCCCCCCCCCCCCCCCCCCCCCCCCCCCCC	1.406
67.375	67.14	Train	740.15	CCCCCCCCCCCCCCCCCCCCCCCCCCCCCCCC	0.235
67.177	66.99	Train	738.15	C=CCCCCCCCCCCCCCCCCCCCCCCCCCCCCCC	0.187
71.657	71.33	Train	783.15	CCCCCCCCCCCCCCCCCCCCCCCCCCCCCCCCc1ccccc1	0.327
72.157	71.86	Train	788.15	CCCCCCCCCCCCCCCCCCCCCCCCCCCCCCCCC1CCCCC1	0.297
71.358	71.1	Train	780.15	CCCCCCCCCCCCCCCCCCCCCCCCCCCCCCCCC1CCCC1	0.258
66.978	66.78	Train	736.15	C#CCCCCCCCCCCCCCCCCCCCCCCCCCCCCCC	0.198
56.911	55.63	Train	634.15	CCCCCCCCCCCCCCCCCCCC=O	1.281
59.01	55.26	Test	616.93	CCCCCCCCCCCCCCCCCCCC	3.75
64.598	73.22	Train	712.15	OCCCCCCCCCCCCCCCCCCCCO	8.622
62.719	70.94	Train	693.15	CCCCCCCCCCCCCCCCCCC(O)CO	8.221
65.887	75.57	Train	725.15	CCCCCCCCCCCCCCCCC(O)CCCO	9.683
63.806	72.08	Train	704.15	CCCCCCCCCCCCCCCCCC(O)CCO	8.274
60.45	64.24	Test	670.15	CCCCCCCCCCCCCCCCCCCC(=O)O	3.79
57.402	59.87	Train	639.15	CCCCCCCCCCCCCCCCCCC(C)O	2.468
64.8	58.77	Train	629.15	CCCCCCCCCCCCCCCCCCCCO	6.03
56.015	54.69	Train	625	CCCCCCCCCCCCCCCCCCC(C)=O	1.325
57.53	55.17	Train	615.54	C=CCCCCCCCCCCCCCCCCCC	2.36
69.447	69.73	Test	760.98	CCCCCCCCCCCCCCCCCCCCOC(C)=O	0.283
74.015	74.3	Train	806.74	CCCCCCCCCCCCCCCCCCCCOC(=O)CCC	0.285
67.102	67.38	Train	737.4	CCCCCCCCCCCCCCCCCCCCOC=O	0.278
71.728	72.01	Test	783.86	CCCCCCCCCCCCCCCCCCCCOC(=O)CC	0.282
62.719	62.81	Train	693.15	CCCCCCCCCCCCCCCCCCCCc1ccccc1	0.091
62.917	63.03	Train	695.15	CCCCCCCCCCCCCCCCCCCCC1CCCCC1	0.113
61.732	61.86	Train	683.15	CCCCCCCCCCCCCCCCCCCCC1CCCC1	0.128
56.029	56.16	Train	625.15	CC#CCCCCCCCCCCCCCCCCC	0.131
53.878	53.89	Train	603.15	CCC#CCCCCCCCCCCCCCCCC	0.012
58.53	54.92	Train	613.16	C#CCCCCCCCCCCCCCCCCCC	3.61
29.17	30.2	Train	336.57	CCC1CO1	1.03
44.21	49.43	Train	514	O=C1CCCCCO1	5.22
14.69	13.14	Train	184.55	CC	1.55
40.853	41	Test	465.57	C=Cc1ccc(C)c(C)c1	0.147
40.853	41	Test	465.57	C=Cc1c(C)cccc1C	0.147
40.909	41.07	Train	466.18	C=Cc1cc(C)ccc1C	0.161
41.744	42	Train	475.26	C=Cc1ccc(C)cc1C	0.256
40.853	41	Test	465.57	C=Cc1cc(C)cc(C)c1	0.147
40.58	43.3	Test	408.15	CCOCCO	2.72
46.73	51.03	Train	475.15	CCOCCOCCO	4.3
40.38	43.32	Train	429.45	CCOCCOC(C)=O	2.94
32.23	32.79	Train	350.21	CCOC(C)=O	0.56
33.72	34.92	Train	372.65	C=CC(=O)OCC	1.2
39.4	37.26	Train	351.44	CCO	2.14
44.64	45.96	Test	486.55	CCOC(=O)c1ccccc1	1.32
35.11	36.95	Train	394.65	CCCC(=O)OCC	1.84
31.59	32.63	Train	365.35	CCCCOCC	1.04
48.28	48.53	Test	466.95	CCC(CC)C(=O)O	0.25
29.79	30.73	Train	327.46	CCOC=O	0.94
34.24	35.74	Test	383	CCOC(=O)C(C)C	1.5
30.607	31.48	Train	354.25	CCOCC(C)C	0.873
27.904	28.77	Train	326.15	CCOC(C)C	0.866
33.84	34.87	Train	386.55	CCC(=O)C(C)C	1.03
36.61	38.09	Train	407.45	CCOC(=O)CC(C)C	1.48
47.15	46.14	Train	427.65	CCOC(=O)C(C)O	1.01
34.38	36.52	Train	390.15	C=C(C)C(=O)OCC	2.14
33.45	34.84	Train	372.25	CCOC(=O)CC	1.39
27.58	29.89	Test	337.01	CCCOCC	2.31
30.616	31.49	Train	354.35	CCOC(C)CC	0.874
29.292	30.63	Train	345.95	CCOC(C)(C)C	1.338
69.05	58.02	Train	567	CCOc1cc(C=O)ccc1O	11.03
26.88	27.24	Test	308.7	C=COCC	0.36
47.078	47.45	Train	533.15	CCC1CCCC2CCCCC12	0.372
45.108	45.63	Train	512.72	CCC1CCCc2ccccc21	0.522
45.399	45.94	Test	515.75	CCC1CCc2ccccc2C1	0.541
53.926	53.89	Train	473.15	CCC(O)(CC)CO	0.036
29.277	29.33	Train	348.15	C=CC(=C)CC	0.053
55.376	54.59	Train	480	CCC(CO)C(C)O	0.786
57.658	56.11	Test	497.74	CCC(O)C(CC)CO	1.548
54.456	54.47	Test	475.2	CCC(CO)CO	0.014
55.376	55.88	Test	480	CCC(CO)CCO	0.504
56.831	54.84	Test	485.43	CCC(CO)CCCO	1.991
43.2	42.43	Test	419.65	CCC(CC)CO	0.77
28.35	28.22	Train	337.82	C=C(CC)CC	0.13
48.574	48.04	Train	480.15	CCCCC(CC)CCO	0.534
47.716	47.19	Test	472	CCCCCC(CC)CO	0.526
47.716	47.19	Train	472	CCC(CC)CCCCO	0.526
45.442	45.42	Test	453	CCCC(CC)CCO	0.022
48.68	45.9	Train	457.75	CCCCC(CC)CO	2.78
45.442	45.42	Train	453	CCC(CC)CCCO	0.022
34.11	33.66	Train	393.15	C=C(CC)CCCC	0.45
32.846	32.66	Train	383.45	C=CC(CC)CCC	0.186
32.819	32.63	Train	383.15	C=CCC(CC)CC	0.189
49.039	48.06	Train	482	CCCCCCC(CC)CO	0.979
49.039	48.06	Train	482	CCCCCC(CC)CCO	0.979
43.718	44.2	Train	439.15	CCC(CC)CCO	0.482
43.718	44.2	Train	439.15	CCCC(CC)CO	0.482
30.68	30.08	Train	357.26	C=CC(CC)CC	0.6
31.33	31.1	Train	367.15	C=C(CC)CCC	0.23
30.173	30.07	Train	357.15	C#CC(CC)CC	0.103
36.48	38.18	Train	442.66	CCC(C)(CC)C(C)(C)C	1.7
36.15	36.71	Train	428.46	CCC(C(C)C)C(C)(C)C	0.56
36.23	35.85	Test	420.16	CCC(CC)CC(C)(C)C	0.38
36.69	36.79	Train	429.26	CCCC(CC)C(C)(C)C	0.1
37.03	38.17	Train	442.6	CCC(C)(C(C)C)C(C)C	1.14
37.24	37.29	Train	434.06	CCC(CC)C(C)C(C)C	0.05
37.2	37.58	Train	436.86	CCCC(C)(CC)C(C)C	0.38
54.44	54.28	Test	480	CCC(O)(CC)C(C)O	0.16
37.07	37.31	Train	434.26	CCC(C)(CC)CC(C)C	0.24
37.15	37.2	Train	433.26	CCC(C)C(CC)C(C)C	0.05
55.141	54.35	Train	480.65	CCC(C(C)O)C(C)O	0.791
36.82	36.58	Train	427.26	CCC(CC(C)C)C(C)C	0.24
45.481	45.44	Train	455	CCCCC(CC)C(C)O	0.041
44.988	45.44	Test	455	CCCCCC(C)(O)CC	0.452
43.767	44.19	Train	441.15	CCCC(CC)C(C)O	0.423
43.752	44.18	Test	441	CCC(CC)CC(C)O	0.428
40.717	40.61	Train	463.15	CCc1ccccc1C(C)C	0.107
37.36	36.8	Train	429.36	CCCC(CC)CC(C)C	0.56
37.74	37.16	Train	432.86	CCC(CC)CCC(C)C	0.58
37.74	37.32	Train	434.36	CCCCC(CC)C(C)C	0.42
35.98	35.04	Train	411.16	CCCC(CC)C(C)C	0.94
35.65	34.6	Train	406.96	CCC(CC)CC(C)C	1.05
32.97	32.85	Train	388.81	CCC(CC)C(C)C	0.12
41.845	42.75	Train	425.15	CCC(CC)C(C)O	0.905
36.809	37.24	Train	411.15	CCC(CC)C(C)=O	0.431
31.335	31.31	Train	369.16	CC=C(CC)CC	0.025
42.3	41.96	Train	476.15	CCCc1ccccc1CC	0.34
37.11	37.49	Train	436.06	CCC(CC)C(C)(C)CC	0.38
36.99	37.41	Test	435.26	CCC(C)C(C)(CC)CC	0.42
42.56	42.72	Train	438.15	CCOCCC(=O)OCC	0.16
45.024	45.47	Train	455.35	CCCCC(O)(CC)CC	0.446
42.367	43.26	Train	432.15	CCCC(O)(CC)CC	0.893
43.354	43.78	Test	437.15	CCC(O)C(CC)CC	0.426
33.317	33.25	Train	389.15	CCC=C(CC)CC	0.067
40.902	40.82	Train	465.15	CCc1cccc(C(C)C)c1	0.082
37.66	37.42	Train	435.36	CCCC(CC)C(C)CC	0.24
37.53	37.59	Train	436.96	CCCCC(C)(CC)CC	0.06
35.73	35.3	Train	413.76	CCCC(C)(CC)CC	0.43
47.525	47.03	Test	472	CCC(O)CCC(CC)CC	0.495
47.035	47.04	Train	472.15	CCCCCC(O)(CC)CC	0.005
40.42	41.77	Train	415.65	CCC(O)(CC)CC	1.35
42.114	41.75	Train	474.15	CCCc1cccc(CC)c1	0.364
44.695	45.14	Train	452.15	CCCC(O)(CC)CCC	0.445
41.325	41.3	Train	469.75	CCc1ccc(C(C)C)cc1	0.025
41.31	41.11	Train	473.15	CCCC(CC)(CCC)C(C)C	0.2
40.833	40.6	Train	468.15	CCCC(C(C)C)C(CC)CC	0.233
37.74	37.5	Test	436.16	CCCC(C)C(CC)CC	0.24
37.32	37.28	Train	433.96	CCCC(C)(CC)CCC	0.04
36.4	35.28	Test	413.56	CCC(C)C(CC)CC	1.12
46.896	46.41	Test	466	CCCCC(O)C(CC)CC	0.486
46.397	46.41	Train	466	CCCCC(O)(CC)CCC	0.013
42.486	42.16	Train	478.15	CCCc1ccc(CC)cc1	0.326
41.024	40.8	Train	470.15	CCCC(CC)(CCC)CCC	0.224
40.928	40.7	Train	469.15	CCCC(CCC)C(CC)CC	0.228
37.7	37.01	Train	431.36	CCC(C)CC(CC)CC	0.69
24.52	22.75	Train	281.22	C#CCC	1.77
35.91	35.4	Train	409.35	CCc1ccccc1	0.51
49.304	50.01	Train	556.15	CCc1ccc(-c2ccccc2)cc1	0.706
47.655	48.25	Train	539.12	CCc1ccccc1-c1ccccc1	0.595
49.592	50.32	Test	559.11	CCc1cccc(-c2ccccc2)c1	0.728
34.957	35.22	Test	389.95	CCC(C=O)CC	0.263
33.766	33.76	Train	394.15	CC=C(CC)CCC	0.006
33.007	32.94	Train	386.15	CC=CC(CC)CC	0.067
44.475	44.66	Test	506.15	CCC12CCCCC1CCCC2	0.185
44.668	44.86	Train	508.15	CCC1CCC2CCCCC2C1	0.192
29.123	28.61	Test	343.75	CCC1CCC1	0.513
34.16	34.65	Train	404.95	CCC1CCCCC1	0.49
34.544	34.99	Train	404.76	CCC1C=CCCC1	0.446
34.669	35.14	Train	406.15	CCC1CC=CCC1	0.471
35.026	35.55	Train	410.14	CCC1=CCCCC1	0.524
32.25	31.86	Train	376.62	CCC1CCCC1	0.39
31.579	31.63	Train	370.92	CCC1C=CCC1	0.051
31.618	31.67	Train	371.36	CCC1CC=CC1	0.052
32.343	32.51	Train	379.48	CCC1=CCCC1	0.167
26.106	25.19	Train	309.08	CCC1CC1	0.916
41.693	41.53	Train	477.15	CCCCCCC(CC)CCC	0.163
42.143	42.01	Train	481.85	CCCCCCCC(CC)CC	0.133
41.502	41.32	Train	475.15	CCCCCC(CC)CCCC	0.182
50.133	50.8	Train	564.69	CCc1cccc(Cc2ccccc2)c1	0.667
50.067	50.73	Train	564.01	CCc1ccccc1Cc1ccccc1	0.663
50.666	51.37	Test	570.18	CCc1ccc(Cc2ccccc2)cc1	0.704
13.46	11.94	Test	169.47	C=C	1.52
51.68	51.18	Test	511.15	O=C1OCCO1	0.5
52.49	55.86	Train	470.45	OCCO	3.37
45.37	49.38	Train	463.65	CC(=O)OCCOC(C)=O	4.01
41.96	44.65	Train	424.5	CCCOCCO	2.69
25.7	25.43	Train	283.85	C1CO1	0.27
32.121	32.81	Train	365	CCc1ccoc1	0.689
32.18	32.88	Train	365.65	CCc1ccco1	0.7
36.65	35.37	Train	414.36	CCCC(CC)CCC	1.28
36.11	35.57	Train	416.35	CCCCC(CC)CC	0.54
40.65	39.43	Train	433.8	CCCCC(C=O)CC	1.22
33.69	33.15	Train	391.69	CCCC(CC)CC	0.54
43.61	44.29	Test	471.75	CCCCC(CC)COC(C)=O	0.68
45.61	46	Train	489.15	C=CC(=O)OCC(CC)CCCC	0.39
46.86	44.38	Test	442.15	CC(=O)OC(C)OC(C)=O	2.48
40.73	40.08	Train	456.93	CCc1cc(C)cc(C)c1	0.65
40.95	40.56	Train	461.59	CCc1ccc(C)cc1C	0.39
41.79	40.73	Train	463.19	CCc1c(C)cccc1C	1.06
48.12	47.63	Train	531.49	CCc1ccc2ccccc2c1	0.49
48.01	47.63	Test	531.48	CCc1cccc2ccccc12	0.38
40.025	39.15	Train	453.15	CCCCC(CC)CCCC	0.875
40.395	39.56	Train	457.15	CCCCCC(CC)CCC	0.835
40.765	39.98	Test	461.15	CCCCCCC(CC)CC	0.785
38.91	37.57	Train	436.8	CCCCC(CC)CCC	1.34
39.24	37.87	Train	439.66	CCCCCC(CC)CC	1.37
41.7	40.7	Test	462.93	CCc1ccc(C)c(C)c1	1
41.64	41.13	Test	467.11	CCc1cccc(C)c1C	0.51
31.01	30.69	Test	366.62	CCC(CC)CC	0.32
49.88	46.45	Train	491.14	CCc1ccc(O)cc1	3.43
44.679	45.07	Train	477.67	CCc1ccccc1O	0.391
43.048	45.07	Train	477.66	CCc1cccc(O)c1	2.022
36.193	37.86	Train	405.15	CCC(CC)OC(C)=O	1.667
46.793	43.52	Train	463.1	CCCC(=O)OC(CC)CC	3.273
34.513	36.85	Test	393.76	CCC(CC)OC=O	2.337
42.44	41.31	Train	440.22	CCC(=O)OC(CC)CC	1.13
40.8	40.39	Train	459.98	CCc1cc(C)ccc1C	0.41
40.443	40.47	Train	460.44	C=Cc1ccccc1CC	0.027
40.697	40.76	Test	463.2	C=Cc1cccc(CC)c1	0.063
40.904	40.99	Train	465.45	C=Cc1ccc(CC)cc1	0.086
33.141	34.5	Test	382.15	CCC1CCCO1	1.359
33.777	35.22	Train	389.15	CCC1CCOC1	1.443
38.17	37.94	Train	435.16	CCc1ccc(C)cc1	0.23
37.93	37.87	Train	434.48	CCc1cccc(C)c1	0.06
38.07	38.27	Train	438.33	CCc1ccccc1C	0.2
33.766	33.76	Train	394.15	CC=C(CC)CCC	0.006
33.007	32.94	Train	386.15	CC=CC(CC)CC	0.067
43.706	43.83	Train	498.15	CCC12CCCCC1CCCC2	0.124
46.595	46.93	Train	528.15	CCC1CCCC2CCCCC12	0.335
43.995	44.14	Train	501.15	CCC1CCC2CCCCC2C1	0.145
36.13	36.36	Train	418.36	C#Cc1ccccc1	0.23
57.56	60.2	Train	655.95	c1ccc2c(c1)-c1cccc3cccc-2c13	2.64
53.12	51.58	Train	570.44	c1ccc2c(c1)Cc1ccccc1-2	1.54
23.16	22.86	Train	254.05	C=O	0.3
70.05	71.25	Test	563.15	O=C(O)/C=C/C(=O)O	1.2
27.17	26.98	Train	304.5	c1ccoc1	0.19
42.15	41.69	Train	434.85	O=Cc1ccco1	0.46
48.62	46.79	Train	443.15	OCc1ccco1	1.83
42.77	46.05	Train	477.15	O=C1CCCO1	3.28
72.8	69.04	Test	595.54	O=C(O)CCCC(=O)O	3.76
57.21	55.87	Test	562.69	O=C1CCCC(=O)O1	1.34
66.13	70.85	Train	563.15	OCC(O)CO	4.72
46.1	46.68	Train	478.15	COc1ccccc1O	0.58
56.47	56.5	Train	629.65	CCCCCCCCCCCCCCCCCCCCC	0.03
56.323	56.39	Train	628.15	C=CCCCCCCCCCCCCCCCCCCC	0.067
63.609	63.67	Test	702.15	CCCCCCCCCCCCCCCCCCCCCc1ccccc1	0.061
63.905	64	Train	705.15	CCCCCCCCCCCCCCCCCCCCCC1CCCCC1	0.095
62.719	62.83	Train	693.15	CCCCCCCCCCCCCCCCCCCCCC1CCCC1	0.111
56.225	56.29	Train	627.15	C#CCCCCCCCCCCCCCCCCCCC	0.065
66.482	66.28	Train	731.15	CCCCCCCCCCCCCCCCCCCCCCCCCCCCCCC	0.202
66.383	66.23	Train	730.15	C=CCCCCCCCCCCCCCCCCCCCCCCCCCCCCC	0.153
71.059	70.77	Test	777.15	CCCCCCCCCCCCCCCCCCCCCCCCCCCCCCCc1ccccc1	0.289
71.458	71.2	Train	781.15	CCCCCCCCCCCCCCCCCCCCCCCCCCCCCCCC1CCCCC1	0.258
70.759	70.54	Train	774.15	CCCCCCCCCCCCCCCCCCCCCCCCCCCCCCCC1CCCC1	0.219
66.184	66.02	Train	728.15	C#CCCCCCCCCCCCCCCCCCCCCCCCCCCCCC	0.164
86.033	84.3	Train	926.15	CCCCCCCCCCCCCCCCCCCCCCCCCCCCCCCCCCCCCCCCCCCCCCCCCCCCCCCCCCCCCCCCCCCCCC	1.733
62.926	62.84	Train	695.25	CCCCCCCCCCCCCCCCCCCCCCCCCCC	0.086
62.818	62.78	Train	694.15	C=CCCCCCCCCCCCCCCCCCCCCCCCCC	0.038
68.369	68.23	Train	750.15	CCCCCCCCCCCCCCCCCCCCCCCCCCCc1ccccc1	0.139
68.767	68.66	Test	754.15	CCCCCCCCCCCCCCCCCCCCCCCCCCCC1CCCCC1	0.107
67.872	67.8	Train	745.15	CCCCCCCCCCCCCCCCCCCCCCCCCCCC1CCCC1	0.072
62.62	62.57	Train	692.15	C#CCCCCCCCCCCCCCCCCCCCCCCCCC	0.05
53.39	52.18	Test	598.15	CCCCCCCCCCCCCCCCC=O	1.21
52.48	51.21	Train	575.3	CCCCCCCCCCCCCCCCC	1.27
61.732	71.6	Train	683.15	CCCCCCCCCCCCCC(O)CCCO	9.868
59.662	68.1	Train	662.15	CCCCCCCCCCCCCCC(O)CCO	8.438
58.58	66.96	Train	651.15	CCCCCCCCCCCCCCCC(O)CO	8.38
60.45	69.24	Train	670.15	OCCCCCCCCCCCCCCCCCO	8.79
57.068	61.02	Train	635.75	CCCCCCCCCCCCCCCCC(=O)O	3.952
53.683	56.25	Train	601.15	CCCCCCCCCCCCCCCC(C)O	2.567
60.26	55.77	Train	597.15	CCCCCCCCCCCCCCCCCO	4.49
52.805	51.55	Train	592.15	CCCCCCCCCCCCCCCC(C)=O	1.255
53.55	51.07	Train	573.48	C=CCCCCCCCCCCCCCCC	2.48
62.639	62.89	Test	692.34	CCCCCCCCCCCCCCCCCOC(C)=O	0.251
67.172	67.45	Train	738.1	CCCCCCCCCCCCCCCCCOC(=O)CCC	0.278
60.313	60.54	Test	668.76	CCCCCCCCCCCCCCCCCOC=O	0.227
64.902	65.17	Train	715.22	CCCCCCCCCCCCCCCCCOC(=O)CC	0.268
59.662	59.82	Train	662.15	CCCCCCCCCCCCCCCCCc1ccccc1	0.158
59.859	60.05	Train	664.15	CCCCCCCCCCCCCCCCCC1CCCCC1	0.191
58.482	58.67	Train	650.15	CCCCCCCCCCCCCCCCCC1CCCC1	0.188
50.955	51.04	Train	573.15	CCC#CCCCCCCCCCCCCC	0.085
52.025	52.17	Test	584.15	CC#CCCCCCCCCCCCCCC	0.145
54.58	50.93	Train	572.16	C#CCCCCCCCCCCCCCCC	3.65
85.123	83.53	Test	917.15	CCCCCCCCCCCCCCCCCCCCCCCCCCCCCCCCCCCCCCCCCCCCCCCCCCCCCCCCCCCCCCCCCCC	1.593
38.8	38.77	Train	425.95	CCCCCCC=O	0.03
31.73	31.2	Train	371.58	CCCCCCC	0.53
56.831	54.83	Train	485.43	CC(O)CCCCCO	2.001
59.952	57.49	Train	511.15	CCCCCC(O)CO	2.462
63.843	62.08	Train	543.15	CCCC(O)CCCO	1.763
59.008	57.2	Test	508.21	CC(O)CCCC(C)O	1.808
62.872	59.45	Train	530.15	OCCCCCCCO	3.422
61.289	58.62	Train	522.15	CCCCC(O)CCO	2.669
59.008	57.19	Train	508.21	CCCC(O)CC(C)O	1.818
59.008	57.2	Test	508.21	CCCCC(O)C(C)O	1.808
51.73	51.3	Test	496.15	CCCCCCC(=O)O	0.43
48.46	45.26	Train	449.45	CCCCCCCO	3.2
44.96	43.5	Test	432.35	CCCCCC(C)O	1.46
42.754	43.24	Train	429.85	CCCCC(O)CC	0.486
42.547	43.03	Test	427.85	CCCC(O)CCC	0.483
38.045	38.21	Train	420.55	CCCCC(=O)CC	0.165
38.62	38.57	Train	424.05	CCCCCC(C)=O	0.05
37.724	37.86	Train	417.15	CCCC(=O)CCC	0.136
71.059	70.65	Train	777.15	CCCCCCCCCCCCCCCCCCCCCCCCCCCCCCCCCCCCC	0.409
70.959	70.6	Train	776.15	C=CCCCCCCCCCCCCCCCCCCCCCCCCCCCCCCCCCCC	0.359
70.66	70.29	Train	773.15	C#CCCCCCCCCCCCCCCCCCCCCCCCCCCCCCCCCCCC	0.37
31.16	31.56	Train	371.56	CC=CCCCC	0.4
31.58	31.28	Train	368.9	CCC=CCCC	0.3
31.73	31.51	Train	371.1	CC=CCCCC	0.22
31.74	31.07	Train	366.79	C=CCCCCC	0.67
31.49	31.28	Train	368.82	CCC=CCCC	0.21
41.482	43.79	Train	465.55	CCCCCCCOC(C)=O	2.308
43.617	46.91	Train	498.25	CCCCCCCOC(=O)CCC	3.293
40.488	42.46	Train	451.25	CCCCCCCOC=O	1.972
42.775	45.48	Train	483.15	CCCCCCCOC(=O)CC	2.705
53.39	53.69	Train	598.15	CCCCCCCC1CCc2ccccc2C1	0.3
53	53.27	Train	594.15	CCCCCCCC1CCCc2ccccc21	0.27
47.75	45.9	Train	519.25	CCCCCCCc1ccccc1	1.85
44.89	45.79	Train	518.06	CCCCCCCC1CCCCC1	0.9
43.35	43.74	Train	497.3	CCCCCCCC1CCCC1	0.39
43.13	43.26	Train	492.15	CCCCCCCC1=CCCC1	0.13
54.562	54.99	Train	610.15	CCCCCCCc1cccc2ccccc12	0.428
54.757	55.19	Train	612.15	CCCCCCCc1ccc2ccccc2c1	0.433
32.775	32.96	Train	385.15	CC#CCCCC	0.185
32.343	32.46	Test	380.31	CCC#CCCC	0.117
31.88	31.69	Test	372.86	C#CCCCCC	0.19
61.949	61.89	Train	685.35	CCCCCCCCCCCCCCCCCCCCCCCCCC	0.059
61.83	61.81	Train	684.15	C=CCCCCCCCCCCCCCCCCCCCCCCCC	0.02
67.673	67.57	Test	743.15	CCCCCCCCCCCCCCCCCCCCCCCCCCc1ccccc1	0.103
68.071	68	Train	747.15	CCCCCCCCCCCCCCCCCCCCCCCCCCC1CCCCC1	0.071
67.077	67.03	Train	737.15	CCCCCCCCCCCCCCCCCCCCCCCCCCC1CCCC1	0.047
61.633	61.6	Train	682.15	C#CCCCCCCCCCCCCCCCCCCCCCCCC	0.033
52.025	50.82	Test	584.15	CCCCCCCCCCCCCCCC=O	1.205
51.31	49.71	Test	560.01	CCCCCCCCCCCCCCCC	1.6
59.072	67.93	Train	656.15	OCCCCCCCCCCCCCCCCO	8.858
57.206	65.65	Train	637.15	CCCCCCCCCCCCCCC(O)CO	8.444
60.351	70.28	Train	669.15	CCCCCCCCCCCCC(O)CCCO	9.929
58.285	66.78	Train	648.15	CCCCCCCCCCCCCC(O)CCO	8.495
65.61	59.86	Train	624.15	CCCCCCCCCCCCCCCC(=O)O	5.75
59.07	54.68	Test	585.15	CCCCCCCCCCCCCCCCO	4.39
52.317	54.91	Train	587.15	CCCCCCCCCCCCCCC(C)O	2.593
51.636	50.41	Test	580.15	CCCCCCCCCCCCCCC(C)=O	1.226
52.03	49.56	Train	558.02	C=CCCCCCCCCCCCCCC	2.47
60.382	60.62	Test	669.46	CCCCCCCCCCCCCCCCOC(C)=O	0.238
64.902	65.17	Train	715.22	CCCCCCCCCCCCCCCCOC(=O)CCC	0.268
58.062	58.27	Train	645.88	CCCCCCCCCCCCCCCCOC=O	0.208
62.639	62.89	Train	692.34	CCCCCCCCCCCCCCCCOC(=O)CC	0.251
58.482	58.66	Train	650.15	CCCCCCCCCCCCCCCCc1ccccc1	0.178
59.33	58.88	Train	652.16	CCCCCCCCCCCCCCCCC1CCCCC1	0.45
59.33	57.41	Train	637.16	CCCCCCCCCCCCCCCCC1CCCC1	1.92
55.442	55.6	Train	619.15	CCCCCCCCCCCCCCCCC1=CCCC1	0.158
49.595	49.67	Test	559.15	CCC#CCCCCCCCCCCCC	0.075
50.566	50.71	Train	569.15	CC#CCCCCCCCCCCCCC	0.144
52.8	49.47	Train	557.16	C#CCCCCCCCCCCCCCC	3.33
28.544	28.29	Train	338.15	C=CCC=CC	0.254
27.54	27.72	Test	332.61	C=CCCC=C	0.18
30.68	30.04	Train	355.05	CC=CC=CC	0.64
29.804	29.84	Train	353.15	CC=CC=CC	0.036
30.51	30.2	Train	356.65	CC=CC=CC	0.31
28.83	28.6	Train	341.15	CC=C=CCC	0.23
28.544	28.29	Train	338.15	C=CCC=CC	0.254
29.253	29.12	Train	346.15	C=CC=CCC	0.133
29.253	29.12	Train	346.15	C=CC=CCC	0.133
29.609	29.43	Train	349.15	C=C=CCCC	0.179
54.84	51.12	Train	571.16	CCc1c(CC)c(CC)c(CC)c(CC)c1CC	3.72
84.819	83.25	Train	914.15	CCCCCCCCCCCCCCCCCCCCCCCCCCCCCCCCCCCCCCCCCCCCCCCCCCCCCCCCCCCCCCCCCC	1.569
46	48.1	Train	536.6	Cc1c(C)c(C)c(C)c(C)c1C	2.1
41.884	41.73	Train	479.15	CC(C)C(C)(C)C(C)(C)C(C)C	0.154
42.843	42.77	Train	489.15	CCC(C)(C)C(C)(C)C(C)(C)C	0.073
41.215	41.01	Train	472.15	CC(C)C(C)C(C)(C)C(C)(C)C	0.205
41.884	41.73	Test	479.15	CC(C)C(C)(C)C(C)C(C)(C)C	0.154
40.833	40.6	Train	468.15	CC(C)(C)CC(C)(C)C(C)(C)C	0.233
40.355	40.08	Train	463.15	CC(C(C)C(C)(C)C)C(C)(C)C	0.275
38.4	40.6	Train	467.15	CC(C)(C)C(C)(C)C(C)(C)C	2.2
36.54	36.41	Test	401.45	CCCCCC=O	0.13
29.11	28.28	Train	341.88	CCCCCC	0.83
55.155	54.4	Train	478.15	CCCC(O)C(C)O	0.755
61.892	60.95	Train	529.15	CCC(O)CCCO	0.942
57.044	57.32	Test	493.95	CC(O)CCC(C)O	0.276
59.35	57.5	Train	508.15	CCCC(O)CCO	1.85
58.02	56.36	Train	497.15	CCCCC(O)CO	1.66
66.23	58.29	Train	516.15	OCCCCCCO	7.94
57.402	56.34	Train	496.94	CCC(O)C(O)CC	1.062
58.969	57.18	Test	505	CC(O)CCCCO	1.789
52.12	49.76	Test	478.85	CCCCCC(=O)O	2.36
45.93	43.51	Train	430.15	CCCCCCO	2.42
42.77	41.74	Train	413.04	CCCCC(C)O	1.03
38.123	41.29	Train	408.55	CCCC(O)CC	3.167
36.62	36.34	Train	400.85	CCCCC(C)=O	0.28
35.32	35.91	Train	396.65	CCCC(=O)CC	0.59
70.361	69.99	Train	770.15	CCCCCCCCCCCCCCCCCCCCCCCCCCCCCCCCCCCC	0.371
70.261	69.94	Train	769.15	C=CCCCCCCCCCCCCCCCCCCCCCCCCCCCCCCCCCC	0.321
73.956	73.47	Train	806.15	CCCCCCCCCCCCCCCCCCCCCCCCCCCCCCCCCCCCc1ccccc1	0.486
74.456	74	Train	811.15	CCCCCCCCCCCCCCCCCCCCCCCCCCCCCCCCCCCCC1CCCCC1	0.456
73.856	73.44	Train	805.15	CCCCCCCCCCCCCCCCCCCCCCCCCCCCCCCCCCCCC1CCCC1	0.416
69.962	69.63	Train	766.15	C#CCCCCCCCCCCCCCCCCCCCCCCCCCCCCCCCCCC	0.332
28.64	28.1	Train	336.63	C=CCCCC	0.54
28.83	28.66	Train	342.03	CC=CCCC	0.17
29.1	28.55	Train	341.02	CC=CCCC	0.55
28.88	28.4	Train	339.6	CCC=CCC	0.48
29.1	28.47	Test	340.24	CCC=CCC	0.63
41.31	41.77	Train	444.65	CCCCCCOC(C)=O	0.46
41.87	45.06	Train	479.15	CCCCCCOC(=O)CCC	3.19
38.241	40.29	Train	428.65	CCCCCCOC=O	2.049
40.994	43.54	Train	463.15	CCCCCCOC(=O)CC	2.546
51.441	52.02	Train	578.15	CCCCCCC1CCCc2ccccc21	0.579
51.928	52.53	Train	583.15	CCCCCCC1CCc2ccccc2C1	0.602
44.95	44.24	Train	499.26	CCCCCCc1ccccc1	0.71
42.84	43.8	Train	497.86	CCCCCCC1CCCCC1	0.96
41.17	41.67	Train	476.26	CCCCCCC1CCCC1	0.5
41.747	41.71	Train	473.15	CCCCCCC1=CCCC1	0.037
61.39	53.63	Test	470.65	CC(O)CC(C)(C)O	7.76
56.55	53.83	Train	595.15	CCCCCCc1cccc2ccccc12	2.72
53.195	53.94	Test	596.15	CCCCCCc1ccc2ccccc2c1	0.745
30.91	30.27	Train	357.67	CC#CCCC	0.64
30.45	28.91	Train	344.48	C#CCCCC	1.54
30.37	29.93	Train	354.35	CCC#CCC	0.44
61.36	57.56	Test	583.15	O=Cc1ccc(O)cc1	3.8
73.49	65.57	Train	576	CCCCC(O)C(=O)O	7.92
53.89	53.29	Train	484	C=CC(=O)OCCO	0.6
39.54	39.59	Test	451.12	c1ccc2c(c1)CCC2	0.05
40.94	40.1	Train	455.77	C1=Cc2ccccc2C1	0.84
21.4	20.34	Test	261.43	CC(C)C	1.06
43.47	39.07	Train	380.81	CC(C)CO	4.4
22.21	21.2	Train	266.25	C=C(C)C	1.01
35.88	36.45	Train	389.8	CC(=O)OCC(C)C	0.57
37.56	37.89	Train	405.15	C=CC(=O)OCC(C)C	0.33
37.627	40.26	Test	430.05	CCCC(=O)OCC(C)C	2.633
33.98	34.73	Train	371.22	CC(C)COC=O	0.75
37.68	39.3	Train	420.65	CC(C)COC(=O)C(C)C	1.62
35.597	38.34	Train	409.75	CCC(=O)OCC(C)C	2.743
38.73	38.94	Train	445.94	CC(C)Cc1ccccc1	0.21
36.057	36.2	Test	421.1	CC(C)CC1CCCC1	0.143
52.148	53.01	Train	585.41	CC(C)Cc1ccc2ccccc2c1	0.862
48.965	49.62	Train	552.65	CC(C)Cc1cccc2ccccc12	0.655
47.485	48.05	Train	510	CC(C)Cc1cccc(O)c1	0.565
47.499	48.07	Train	510.15	CC(C)Cc1ccc(O)cc1	0.571
47.485	48.05	Train	510	CC(C)Cc1ccccc1O	0.565
30.78	30.19	Train	337.25	CC(C)C=O	0.59
43.88	45.11	Train	427.85	CC(C)C(=O)O	1.23
53.28	49.19	Test	493	CC(C)CCCCCCCO	4.09
24.79	24.23	Train	300.99	CCC(C)C	0.56
37.6	38.9	Train	415.25	CC(=O)OCCC(C)C	1.3
35.128	37.22	Train	397.25	CC(C)CCOC=O	2.092
43.15	43.82	Train	467.15	CC(C)CCOC(=O)CC(C)C	0.67
38.443	40.53	Test	432.65	CCC(=O)OCCC(C)C	2.087
42.37	45.11	Train	488.35	CC1=CC(=O)CC(C)(C)C1	2.74
84.328	84.37	Train	753	O=C(O)c1cccc(C(=O)O)c1	0.042
26.07	25.27	Test	307.22	C=CC(=C)C	0.8
32.23	33.74	Train	361.65	CC(=O)OC(C)C	1.51
39.87	36.94	Train	355.41	CC(C)O	2.93
36.024	37.75	Train	404.15	CCCC(=O)OC(C)C	1.726
29.536	31.87	Train	341.25	CC(C)OC=O	2.334
33.995	35.76	Train	383.15	CCC(=O)OC(C)C	1.765
57.402	56.34	Train	496.94	CC(C)C(CO)CO	1.062
59.008	58.48	Train	508.21	CC(C)C(CO)CCO	0.528
49.24	48.71	Train	488.35	CCCCC(CCO)C(C)C	0.53
47.141	47.56	Train	473.74	CCCC(CO)C(C)C	0.419
32.833	32.94	Train	386.15	C=C(CCC)C(C)C	0.107
36.61	37.89	Test	439.86	CCCC(C(C)C)C(C)C	1.28
45.661	46.11	Train	463.15	CCCC(O)(CCC)C(C)C	0.449
36.66	36.9	Train	427.91	CC(C)C1CCCCC1	0.24
33.895	34.09	Test	399.57	CC(C)C1CCCC1	0.195
27.958	27.34	Train	331.47	CC(C)C1CC1	0.618
37.45	37.08	Train	432.06	CCCC(CCC)C(C)C	0.37
47.831	48.51	Train	540.94	CC(C)c1cccc2ccccc12	0.679
47.871	48.55	Test	541.35	CC(C)c1ccc2ccccc2c1	0.679
41.119	40.91	Train	471.15	CCCCC(CCCC)C(C)C	0.209
41.119	40.91	Train	471.15	CCCCCC(CCC)C(C)C	0.209
39.481	38.94	Train	451.15	CCCCC(CCC)C(C)C	0.541
45.047	45.91	Train	487.65	CC(C)c1ccccc1O	0.863
46.467	47.43	Train	502.35	CC(C)c1ccc(O)cc1	0.963
46.351	47.31	Train	501.15	CC(C)c1cccc(O)c1	0.959
31.85	33.84	Train	378.66	CC(C)OC(C)(C)C	1.99
72.07	74.78	Test	601	C=C(CC(=O)O)C(=O)O	2.71
19.39	19.13	Test	223.34	C=C=O	0.26
58.16	53.53	Train	447	CC(O)C(=O)O	4.63
52.639	58.26	Train	518.95	CC(=O)CCC(=O)O	5.621
69	60.4	Train	628	CCCCC/C=C\C/C=C\CCCCCCCC(=O)O	8.6
71.02	71.47	Train	565	O=C(O)/C=C\C(=O)O	0.45
47.22	46.92	Test	475.15	O=C1C=CC(=O)O1	0.3
90.65	80.62	Train	602	O=C(O)CC(O)C(=O)O	10.03
36.09	36.6	Train	402.95	CC(=O)C=C(C)C	0.51
39.31	38.23	Train	437.89	Cc1cc(C)cc(C)c1	1.08
51.524	52.54	Train	452	CC(O)C(C)O	1.016
57.402	57.63	Train	496.94	CC(CO)C(C)CO	0.228
59.008	57.19	Train	508.21	CC(CO)CC(C)CO	1.818
54.413	54.37	Train	474.15	CC(O)CC(C)O	0.043
29.74	30.63	Train	341.15	C=C(C)C=O	0.89
8.16	6.95	Test	111.66	C	1.21
52.92	52.07	Train	478.26	COCC(=O)O	0.85
39.47	42.64	Train	397.55	COCCO	3.17
46.38	50.43	Train	466.75	COCCOCCO	4.05
53.9	51.86	Train	516	COc1ccc(O)cc1	2.04
30.492	32.02	Train	359.45	CCC(C)(C)OC	1.528
30.501	31.68	Train	356.15	COC(C)C(C)C	1.179
31.232	32.19	Train	361.15	CCC(CC)OC	0.958
31.504	32.5	Train	364.15	CCCC(C)OC	0.996
30.199	31.68	Train	356.15	COCC(C)(C)C	1.481
31.413	32.4	Train	363.15	CCC(C)COC	0.987
31.413	32.4	Train	363.15	COCCC(C)C	0.987
30.61	31	Train	330.09	COC(C)=O	0.39
43.12	43.85	Train	444.85	COC(=O)CC(C)=O	0.73
32.21	33.16	Train	353.35	C=CC(=O)OC	0.95
35.14	37.19	Train	337.85	CO	2.05
44.02	44.68	Train	472.65	COC(=O)c1ccccc1	0.66
33.3	35.22	Train	375.9	CCCC(=O)OC	1.92
30.468	30.55	Train	343.35	CCCCOC	0.082
51.92	47.71	Train	540	CCCCCCCCCCCC(=O)OC	4.21
26.64	24.56	Test	280.5	CCOC	2.08
31.22	31.8	Train	352.79	CCC(C)=O	0.58
28.19	28.77	Train	304.9	COC=O	0.58
28.09	29.34	Train	331.7	COCC(C)C	1.25
32.66	33.5	Train	371.15	C=C(C)C(C)=O	0.84
26.5	26.7	Train	303.92	COC(C)C	0.2
33.72	33.09	Train	367.55	CC(=O)C(C)C	0.63
34.3	35	Train	373.45	C=C(C)C(=O)OC	0.7
63.63	55.14	Test	617	CCCCCCCC/C=C\CCCCCCCC(=O)OC	8.49
32.526	33.33	Train	372.15	CCCCCOC	0.804
32.44	33.04	Test	352.6	CCC(=O)OC	0.6
31	27.5	Train	311.72	CCCOC	3.5
33.47	33.91	Train	375.46	CCCC(C)=O	0.44
52.02	49.04	Train	493.65	COC(=O)c1ccccc1O	2.98
28.89	29.39	Train	332.15	CCC(C)OC	0.5
28.17	29	Train	328.35	COC(C)(C)C	0.83
30.61	32.02	Test	359.45	CCC(C)(C)OC	1.41
25.05	24.42	Test	278.65	C=COC	0.63
43.625	43.77	Test	493.74	CC1CCCc2ccccc21	0.145
43.57	43.71	Train	493.15	CC1CCc2ccccc2C1	0.14
49.886	50.54	Test	562.15	CCC(c1ccccc1)c1ccccc1	0.654
49.789	50.44	Train	561.15	Cc1cccc(C(C)c2ccccc2)c1	0.651
49.984	50.65	Train	563.15	Cc1ccc(C(C)c2ccccc2)cc1	0.666
26.66	25.97	Train	314	C=C=C(C)C	0.69
52.361	53.13	Test	462.15	CCC(C)(O)CO	0.769
54.294	54.26	Train	473.15	CC(C)C(O)CO	0.034
50.566	51.27	Train	569.15	Cc1cccc(CCc2ccccc2)c1	0.704
49.789	50.44	Train	561.15	Cc1ccc(CCc2ccccc2)cc1	0.651
50.663	51.37	Train	570.15	CC(Cc1ccccc1)c1ccccc1	0.707
56.686	55.75	Train	494.25	CCCCC(C)(O)CO	0.936
28.856	28.81	Train	343.15	C=C=C(C)CC	0.046
28.792	28.81	Test	343.15	C=C=CC(C)C	0.018
55.918	55.63	Train	490	CCCC(C)(O)CO	0.288
50.808	52.46	Train	451.15	CC(C)(O)CO	1.652
53.616	54.16	Train	472.15	CC(C)(O)CCO	0.544
53.046	53.18	Train	462.65	CC(O)C(C)CO	0.134
29.323	29.46	Train	349.45	C=CC=C(C)C	0.137
55.088	54.9	Train	482.98	CCC(C)(O)CCO	0.188
56.985	55.99	Test	493.45	CCC(O)C(C)CO	0.995
56.28	56.17	Train	487.15	CC(O)CCO	0.11
53.106	54.52	Train	463.15	CC(CO)CCO	1.414
27.074	26.74	Test	323.15	C=CCC(=C)C	0.334
27.481	27.26	Train	328.15	C=CC(C)C=C	0.221
59.008	57.19	Train	508.21	CC(O)C(C)CCCO	1.818
56.686	55.75	Train	494.25	CC(C)(O)CCCCO	0.936
57.402	56.34	Train	496.94	CC(CO)CCCO	1.062
60.972	58.88	Train	521.55	CC(CCO)CCO	2.092
56.831	54.84	Test	485.43	CC(CCO)CCCO	1.991
29.385	29.53	Train	350.15	C=CC(C)=CC	0.145
29.297	29.43	Train	349.15	C=C(C)C=CC	0.133
29.297	29.43	Train	349.15	C=C(C)C=CC	0.133
29.385	29.53	Train	350.15	C=CC(C)=CC	0.145
44.75	40.88	Train	401.85	CCC(C)CO	3.87
43.84	41.14	Train	404.35	CC(C)CCO	2.7
24.39	23.78	Train	293.21	C=CC(C)C	0.61
25.58	24.93	Train	304.3	C=C(C)CC	0.65
25.08	25.08	Train	305.4	C#CC(=C)C	0
26.02	24.71	Train	302.15	C#CC(C)C	1.31
40.921	40.31	Train	463.85	C=C(C)CCCCCCCC	0.611
44.312	44.3	Train	504.45	C=C(C)CCCCCCCCCC	0.012
36.18	36.63	Test	425.31	CCC1(C)CCCCC1	0.45
33.23	33.59	Train	394.67	CCC1(C)CCCC1	0.36
27.819	27.18	Train	329.92	CCC1(C)CC1	0.639
48.336	49.05	Train	546.15	CCc1c(C)ccc2ccccc12	0.714
52.415	52.5	Test	588.15	C=C(C)CCCCCCCCCCCCCCC	0.085
46.147	46.11	Train	459.75	CCC(C)CCCCO	0.037
45.792	45.76	Train	456.35	CCCC(C)CCCO	0.032
46.084	46.05	Train	459.15	CCCCC(C)CCO	0.034
44.998	44.98	Test	448.75	CCCCCC(C)CO	0.018
46.262	46.23	Train	460.85	CC(C)CCCCCO	0.032
33.696	33.59	Train	392.45	C=C(C)CCCCC	0.106
33.106	32.96	Train	386.35	C=CCCCC(C)C	0.146
33.115	32.97	Test	386.45	C=CCCC(C)CC	0.145
33.07	32.91	Train	385.95	C=CCC(C)CCC	0.16
32.909	32.73	Train	384.15	C=CC(C)CCCC	0.179
50.955	51.04	Train	573.15	C=C(C)CCCCCCCCCCCCCC	0.085
44.444	44.92	Train	446.15	CCC(C)CCCO	0.476
44.34	44.82	Train	445.15	CCCC(C)CCO	0.48
43.407	43.89	Test	436.15	CCCCC(C)CO	0.483
48.07	44.81	Train	445.15	CC(C)CCCCO	3.26
30.419	30.21	Train	358.46	C=CCCC(C)C	0.209
30.62	30.35	Train	359.88	C=CCC(C)CC	0.27
30.73	30.06	Train	357.05	C=CC(C)CCC	0.67
31.08	30.88	Train	364.99	C=C(C)CCCC	0.2
30.869	30.88	Train	365	C#CCCC(C)C	0.011
30.793	30.79	Train	364.15	C#CCC(C)CC	0.003
30.261	30.17	Test	358.15	C#CC(C)CCC	0.091
35.755	36.2	Train	421.15	CC(C)C1(C)CCCC1	0.445
52.148	53.01	Train	585.41	Cc1ccc2ccccc2c1C(C)C	0.862
55.051	55.13	Train	615.15	C=C(C)CCCCCCCCCCCCCCCCC	0.079
49.568	48.57	Test	487	CCC(C)CCCCCCO	0.998
49.568	48.57	Test	487	CCCCCCC(C)CCO	0.998
49.568	48.57	Train	487	CCCCC(C)CCCCO	0.998
49.568	48.57	Train	487	CCCCCC(C)CCCO	0.998
50.432	49.1	Train	495.15	CCCCCCCC(C)CO	1.332
38.616	38.11	Train	441.55	C=C(C)CCCCCCC	0.506
53.78	53.87	Train	602.15	C=C(C)CCCCCCCCCCCCCCCC	0.09
48.469	47.93	Train	479.15	CCC(C)CCCCCO	0.539
47.821	47.3	Train	473	CCCC(C)CCCCO	0.521
47.821	47.3	Train	473	CCCCC(C)CCCO	0.521
47.821	47.3	Train	473	CCCCCC(C)CCO	0.521
47.821	47.3	Train	473	CCCCCCC(C)CO	0.521
48.469	47.93	Train	479.15	CC(C)CCCCCCO	0.539
36.209	36.08	Train	417.8	C=C(C)CCCCCC	0.129
49.401	49.47	Train	557.15	C=C(C)CCCCCCCCCCCCC	0.069
45.73	42.58	Train	421.15	CCCC(C)CO	3.15
40.407	42.98	Train	424.95	CC(C)CCCO	2.573
40.575	43.04	Train	425.55	CCC(C)CCO	2.465
27.3	27.14	Test	327.33	C=CC(C)CC	0.16
28.35	27.96	Train	335.25	C=C(C)CCC	0.39
27.41	27.1	Train	327.01	C=CCC(C)C	0.31
27.7	27.5	Train	330.85	C#CC(C)CC	0.2
28.005	27.86	Train	334.32	C#CCC(C)C	0.145
38.882	39.1	Train	447.15	CC=C(C)c1ccccc1	0.218
40.151	40.54	Test	461.06	CC(C)=Cc1ccccc1	0.389
40.77	41.24	Train	467.85	CC=C(C)c1ccccc1	0.47
35.893	35.99	Test	419.15	CCCC1(C)CCCC1	0.097
52.148	53.01	Train	585.41	CCCc1c(C)ccc2ccccc12	0.862
47.755	47.8	Test	540.15	C=C(C)CCCCCCCCCCCC	0.045
46.113	46.14	Train	523.15	C=C(C)CCCCCCCCCCC	0.027
39.159	38.91	Train	445.35	C=C(C)c1ccccc1C	0.249
40.815	41	Train	465.57	CC=Cc1ccccc1C	0.185
50.067	51.58	Train	447.15	CC(O)C(C)(C)O	1.513
42.571	42.33	Test	479.75	CCc1cccc(C)c1CC	0.241
28.966	29.02	Test	345.15	CC=C=C(C)C	0.054
57.187	57.26	Train	505.76	CCC(C)(O)C(C)O	0.073
57.187	57.26	Train	505.76	CCC(O)C(C)(C)O	0.073
42.422	42.16	Train	478.15	CCc1ccc(C)c(CC)c1	0.262
61.135	59.54	Train	530.99	CCC(O)C(C)C(C)O	1.595
58.799	58.1	Train	517.03	CCC(O)CC(C)(C)O	0.699
58.799	58.1	Train	517.03	CCC(C)(O)CC(C)O	0.699
61.135	59.54	Train	530.99	CC(O)CC(O)C(C)C	1.595
59.513	58.7	Train	519.72	CC(O)C(C)C(C)O	0.813
42.617	42.38	Test	480.25	CCc1ccc(CC)c(C)c1	0.237
58.799	59.39	Test	517.03	CC(O)CCC(C)(C)O	0.591
42.775	42.56	Train	481.95	CCc1cccc(CC)c1C	0.215
41.1	39.1	Train	384.65	CC(C)C(C)O	2
26.48	25.69	Train	311.71	CC=C(C)C	0.79
42.622	49.34	Train	471.65	CC=C(C)C(=O)O	6.718
42.292	48.98	Train	468.15	CC(C)=CC(=O)O	6.688
41.347	47.95	Train	458.15	CC=C(C)C(=O)O	6.603
42.765	42.47	Train	481.15	CCCCc1ccccc1C	0.295
56.977	56.55	Test	498.95	CCC(C)(CO)CO	0.427
42.872	43.79	Train	435.15	CCC(CO)C(C)C	0.918
41.891	43.27	Test	430.15	CCC(C)(CC)CO	1.379
30.28	30.32	Train	359.51	C=C(CC)C(C)C	0.04
46.627	46.57	Train	466	CCC(CO)CCC(C)C	0.057
46.851	46.8	Train	468.15	CCC(C)CC(CC)CO	0.051
46.627	46.57	Test	466	CCCC(C)C(CC)CO	0.057
46.21	46.16	Train	462	CCCCC(CC)C(C)O	0.05
44.683	45.11	Test	450	CCC(C)C(CC)CO	0.427
44.219	45.13	Train	450.25	CCCC(C)(CC)CO	0.911
44.646	45.07	Train	449.65	CCC(CO)CC(C)C	0.424
32.7	32.78	Train	384.65	C=C(CC)C(C)CC	0.08
32.593	32.66	Train	383.45	C=C(CC)CC(C)C	0.067
48.626	49.36	Train	549.15	CCc1ccc2ccccc2c1C	0.734
46.166	46.73	Train	495.55	CCc1cc(C)ccc1O	0.564
44.171	44.6	Train	445.05	CC(C)CCCC(C)O	0.429
42.132	43.03	Train	429.85	CCCCCC(C)(C)O	0.898
43.571	44	Train	439.25	CCCCC(C)C(C)O	0.429
44.14	44.57	Train	444.75	CCCC(C)CC(C)O	0.43
44.171	44.6	Train	445.05	CCC(C)CCC(C)O	0.429
33.91	33.93	Train	395.75	CCCCC=C(C)C	0.02
40.45	41.8	Test	415.95	CCCCC(C)(C)O	1.35
41.845	42.75	Test	425.15	CCCC(C)C(C)O	0.905
41.743	42.65	Train	424.15	CCC(C)CC(C)O	0.907
41.743	42.65	Train	424.15	CC(C)CCC(C)O	0.907
36.997	37.45	Train	413.15	CCCC(C)C(C)=O	0.453
38.43	37.94	Test	417.95	CC(=O)CCC(C)C	0.49
36.903	37.35	Train	412.15	CCC(C)CC(C)=O	0.447
31.281	31.25	Test	368.56	CCCC=C(C)C	0.031
31.645	31.98	Train	375.61	CC#CCC(C)C	0.335
47.555	47.56	Train	477.15	CC(C)CC(CO)CC(C)C	0.005
41.27	41.23	Train	469.15	Cc1ccccc1CC(C)C	0.04
43.848	44.71	Train	446.15	CC(C)C(CO)C(C)C	0.862
31.747	32.01	Train	377.15	C=C(C(C)C)C(C)C	0.263
48.543	48.49	Train	486.15	CC(C)CCC(CO)C(C)C	0.053
47.243	47.25	Train	474.15	CCC(C)CC(CO)C(C)C	0.007
45.522	45.97	Train	460.15	CC(C)CC(CO)C(C)C	0.448
52.148	53.01	Train	585.41	Cc1cc2ccccc2cc1C(C)C	0.862
46.548	47.14	Train	501.15	Cc1cccc(O)c1C(C)C	0.592
46.548	47.14	Test	501.15	Cc1ccc(O)c(C(C)C)c1	0.592
46.985	47.6	Train	505.65	Cc1ccc(C(C)C)c(O)c1	0.615
48.577	48.26	Train	487	CCCCCCCC(C)(C)O	0.317
49.099	48.57	Train	487	CCCC(C)CCCC(C)O	0.529
49.099	48.57	Train	487	CC(C)CCCCCC(C)O	0.529
49.099	48.57	Train	487	CCCCCCC(C)C(C)O	0.529
49.099	48.57	Test	487	CCC(C)CCCCC(C)O	0.529
49.099	48.57	Train	487	CCCCC(C)CCC(C)O	0.529
45.377	45.33	Train	454	CC(C)CCCCC(C)O	0.047
45.377	45.33	Train	454	CCCC(C)CCC(C)O	0.047
44.592	45.04	Train	451.15	CCCCCCC(C)(C)O	0.448
45.377	45.33	Train	454	CCCCCC(C)C(C)O	0.047
37.132	39.84	Train	394.56	CCCC(C)(C)O	2.708
41.45	40.9	Test	404.85	CC(C)CC(C)O	0.55
38.352	41.16	Train	407.36	CCC(C)C(C)O	2.808
33.939	35.28	Train	390.55	CCC(C)C(C)=O	1.341
35.82	35.19	Train	389.65	CC(=O)CC(C)C	0.63
28.9	28.49	Train	340.45	CCC=C(C)C	0.41
28.91	29.1	Train	346.28	CC#CC(C)C	0.19
58.541	57.36	Train	509.85	CCCC(C)(CO)CO	1.181
48.485	47.97	Train	481.15	CCCC(CO)CC(C)CC	0.515
46.588	46.49	Test	465.15	CCCC(CO)CC(C)C	0.098
40.517	40.2	Train	458.08	CCCc1ccccc1C	0.317
52.148	53.01	Test	585.41	CCCc1cc2ccccc2cc1C	0.862
52.148	53.01	Test	585.41	CCCc1ccc2ccccc2c1C	0.862
51.577	51.96	Train	547.87	CCCc1ccc(C)cc1O	0.383
51.577	51.96	Test	547.87	CCCc1cc(C)ccc1O	0.383
50.313	50.63	Test	535	CCCc1c(C)cccc1O	0.317
41.27	41.23	Train	469.15	CCC(C)c1ccccc1C	0.04
40.896	41.69	Test	473.6	Cc1ccccc1C(C)(C)C	0.794
40.338	40.24	Train	458.15	C=C(C)c1cccc(C)c1	0.098
40.815	41	Train	465.57	CC=Cc1cccc(C)c1	0.185
41.597	41.42	Train	476.15	CCCCC(CC)(CC)C(C)C	0.177
41.789	41.63	Train	478.15	CCCC(C)C(CC)(CC)CC	0.159
39.462	39.77	Train	459.15	CCCC(CC)(CC)C(C)C	0.308
42.292	42.02	Train	476.75	CCc1ccc(C)cc1CC	0.272
41.406	41.22	Test	474.15	CCCC(CC)C(C)(CC)CC	0.186
40.833	40.6	Test	468.15	CCCC(CC)C(CC)C(C)C	0.233
41.406	41.22	Train	474.15	CCCC(C)(CC)C(CC)CC	0.186
39.218	39.05	Train	452.15	CCC(CC)C(CC)C(C)C	0.168
39.462	39.77	Train	459.15	CCC(CC)C(C)(CC)CC	0.308
58.799	58.1	Train	517.03	CCC(O)C(C)(O)CC	0.699
42.023	41.72	Train	473.85	CCc1cc(C)cc(CC)c1	0.303
40.833	40.6	Train	468.15	CCC(CC)CC(CC)C(C)C	0.233
41.024	40.8	Train	470.15	CCC(CC)CC(C)(CC)CC	0.224
41.31	41.11	Train	473.15	CCC(CC)C(C)C(CC)CC	0.2
40.677	47.09	Test	450	C=C(C)CC(=O)O	6.413
40.626	47.11	Train	450	C=CC(C)C(=O)O	6.484
42.486	42.16	Train	478.15	CCCCc1cccc(C)c1	0.326
59.008	58.48	Train	508.21	CCC(CO)C(C)CO	0.528
46.538	46.49	Train	465.15	CCCC(CC)CC(C)O	0.048
44.476	44.9	Train	448	CCC(CC)C(C)CO	0.424
43.988	44.9	Train	448	CCC(C)(CC)CCO	0.912
44.476	44.9	Test	448	CCC(CCO)C(C)C	0.424
32.566	32.63	Train	383.15	C=C(C)C(CC)CC	0.064
32.303	32.37	Train	380.65	C=CC(CC)C(C)C	0.067
32.383	32.83	Train	385.15	C=CC(C)(CC)CC	0.447
44.158	45.04	Test	451.15	CCCC(CC)C(C)(C)O	0.882
42.926	43.78	Train	437.15	CCC(C(C)C)C(C)O	0.854
41.829	43.14	Test	430.95	CCC(CC)C(C)(C)O	1.311
42.036	43.35	Train	433	CCC(C)(CC)C(C)O	1.314
33.15	33.35	Test	390.15	CCC(CC)=C(C)C	0.2
45.969	46.42	Train	466.15	CCCCC(O)(CC)C(C)C	0.451
45.954	46.41	Test	466	CCC(C)CC(O)(CC)CC	0.456
44.78	45.67	Test	457.25	CCCC(O)(CC)C(C)C	0.89
43.545	44.42	Train	445.15	CCC(O)(CC)CC(C)C	0.875
44.244	45.13	Train	452	CCC(C)C(O)(CC)CC	0.886
41.31	41.11	Train	473.15	CCCC(CC)(C(C)C)C(C)C	0.2
42.052	43.37	Train	433.15	CCC(O)(CC)C(C)C	1.318
33.02	33.25	Train	389.15	CC=C(CC)C(C)C	0.23
51.65	49.46	Train	550.16	CCc1cc2ccccc2cc1C	2.19
48.336	49.05	Train	546.15	CCc1cc(C)c2ccccc2c1	0.714
41.215	41.01	Train	472.15	CCCCC(C)CC(CC)CC	0.205
41.693	41.53	Train	477.15	CCCCCCC(C)(CC)CC	0.163
41.406	41.22	Test	474.15	CCCCCCC(CC)C(C)C	0.186
41.31	41.11	Train	473.15	CCCCCC(C)C(CC)CC	0.2
39.848	39.36	Train	455.15	CCCCCC(CC)C(C)C	0.488
39.939	39.46	Train	456.15	CCCCC(C)C(CC)CC	0.479
39.788	39.74	Train	458.85	CCCCCC(C)(CC)CC	0.048
32.81	33.12	Train	391.42	CCC(C)(CC)CC	0.31
47.49	48.13	Train	509.15	CCc1cc(O)ccc1C	0.64
46.614	47.2	Train	500.15	CCc1cccc(O)c1C	0.586
32.869	33.07	Train	387.45	CC=C(CC)C(C)C	0.201
42.28	42.71	Train	426.75	CCC(C)CC(O)CC	0.43
42.466	42.89	Train	428.55	CCCC(C)C(O)CC	0.424
42.925	43.35	Train	433	CCC(O)CCC(C)C	0.425
43.726	44.15	Train	440.75	CCCCC(O)C(C)C	0.424
42.572	43.47	Train	434.15	CCCCC(C)(O)CC	0.898
40.45	41.8	Train	415.95	CCCC(C)(O)CC	1.35
41.538	42.44	Train	422.15	CCC(C)C(O)CC	0.902
41.435	42.34	Train	421.15	CCC(O)CC(C)C	0.905
41.128	42.03	Train	418.15	CCCC(O)C(C)C	0.902
36.622	37.04	Train	409.15	CCC(=O)CC(C)C	0.418
36.622	37.04	Train	409.15	CCC(=O)C(C)CC	0.418
36.341	36.73	Train	406.15	CCCC(=O)C(C)C	0.389
31.004	31.23	Train	368.35	CCC#CC(C)C	0.226
41.086	41.03	Train	467.15	Cc1cccc(CC(C)C)c1	0.056
45.381	46.32	Test	465.15	CCCC(O)(C(C)C)C(C)C	0.939
43.685	45.04	Test	451.15	CCC(O)(C(C)C)C(C)C	1.355
39.154	38.98	Train	451.45	CCCCC(C(C)C)C(C)C	0.174
52.148	53.01	Train	585.41	Cc1cc(C(C)C)cc2ccccc12	0.862
40.928	40.7	Train	469.15	CCCCCC(C(C)C)C(C)C	0.228
46.922	47.53	Train	505	Cc1ccc(O)cc1C(C)C	0.608
51.047	51.92	Train	547.43	Cc1c(O)cccc1C(C)C	0.873
48.527	48.01	Train	481.55	CCCCCCC(O)C(C)C	0.517
48.574	48.06	Train	482	CCCCC(C)CC(O)CC	0.514
48.058	48.06	Test	482	CCCCCCC(C)(O)CC	0.002
45.705	45.66	Test	457.15	CCCCCC(O)C(C)C	0.045
45.725	46.18	Train	462.15	CCCCCC(C)(O)CC	0.455
45.898	45.85	Train	459	CCCCC(C)C(O)CC	0.048
45.898	45.85	Train	459	CCC(C)CCC(O)CC	0.048
45.898	45.85	Train	459	CCC(O)CCCC(C)C	0.048
37.065	39.94	Train	395.56	CCC(C)(O)CC	2.875
37.442	40.36	Test	399.66	CCC(O)C(C)C	2.918
40.248	39.89	Train	455.13	CCCc1cccc(C)c1	0.358
51.577	51.96	Test	547.87	CCCc1cc(O)ccc1C	0.383
48.35	48.57	Train	515	CCCc1cccc(O)c1C	0.22
41.086	41.03	Train	467.15	CCC(C)c1cccc(C)c1	0.056
39.884	40.54	Test	462.41	Cc1cccc(C(C)(C)C)c1	0.656
40.43	40.34	Train	459.15	C=C(C)c1ccc(C)cc1	0.09
41.144	41.37	Train	469.15	CC=Cc1ccc(C)cc1	0.226
41.603	41.89	Train	474.15	CC=Cc1ccc(C)cc1	0.287
40.737	40.49	Test	467.15	CCCC(CC)(CC)CC(C)C	0.247
41.693	41.53	Train	477.15	CCCC(CC)(CC)C(C)CC	0.163
39.822	40.18	Train	463.15	CCC(C)C(CC)(CC)CC	0.358
38.831	39.05	Test	452.15	CCC(CC)(CC)CC(C)C	0.219
40.641	40.39	Test	466.15	CCC(CC)C(CC)CC(C)C	0.251
41.119	40.91	Train	471.15	CCC(C)C(CC)C(CC)CC	0.209
42.672	42.37	Train	480.15	CCCCc1ccc(C)cc1	0.302
44.729	45.13	Train	452	CCC(CC)C(O)C(C)C	0.401
44.244	45.13	Train	452	CCC(CC)C(C)(O)CC	0.886
40.355	40.08	Train	463.15	CCC(CC)C(C(C)C)C(C)C	0.275
48.432	49.15	Train	547.15	CCc1ccc(C)c2ccccc12	0.718
48.432	49.15	Test	547.15	CCc1cc(C)cc2ccccc12	0.718
41.406	41.22	Train	474.15	CCCCCC(CC)C(C)CC	0.186
41.215	41.01	Test	472.15	CCCCC(C)C(CC)CCC	0.205
41.215	41.01	Train	472.15	CCCCCC(C)(CC)CCC	0.205
41.119	40.91	Train	471.15	CCCCCC(CC)CC(C)C	0.209
39.848	39.36	Train	455.15	CCCCC(CC)C(C)CC	0.488
39.298	38.74	Train	449.15	CCCCC(CC)CC(C)C	0.558
39.27	39.15	Train	453.15	CCCCC(C)(CC)CCC	0.12
46.672	47.26	Train	500.75	CCc1ccc(O)c(C)c1	0.588
46.906	47.51	Train	503.15	CCc1ccc(O)cc1C	0.604
42.582	43.48	Test	434.25	CCCC(C)(O)CCC	0.898
43.426	43.85	Train	437.85	CCCC(O)C(C)CC	0.424
43.571	44	Train	439.25	CCCC(O)CC(C)C	0.429
41.27	41.23	Train	469.15	Cc1ccc(CC(C)C)cc1	0.04
38.921	39.15	Train	453.15	CCCC(C)(CCC)C(C)C	0.229
38.582	38.32	Train	445.15	CCCC(CC(C)C)C(C)C	0.262
39.036	38.84	Train	450.15	CCCC(C(C)C)C(C)CC	0.196
52.148	53.01	Train	585.41	Cc1ccc(C(C)C)c2ccccc12	0.862
40.355	40.08	Train	463.15	CCCCC(CC(C)C)C(C)C	0.275
41.119	40.91	Test	471.15	CCCCC(C)(CCC)C(C)C	0.209
40.833	40.6	Train	468.15	CCCCC(C(C)C)C(C)CC	0.233
47.407	48.05	Train	510	Cc1cc(O)ccc1C(C)C	0.643
51.047	51.92	Train	547.43	Cc1cc(C(C)C)ccc1O	0.873
48.574	48.06	Train	482	CCCCC(C)C(O)CCC	0.514
48.574	48.06	Train	482	CCCC(O)CCC(C)CC	0.514
48.574	48.06	Test	482	CCCCCC(O)CC(C)C	0.514
48.058	48.06	Train	482	CCCCCC(C)(O)CCC	0.002
45.481	45.44	Train	455	CCCC(O)CCC(C)C	0.041
45.481	45.44	Train	455	CCCC(O)CC(C)CC	0.041
45.481	45.44	Train	455	CCCC(C)C(O)CCC	0.041
44.901	45.35	Test	454.15	CCCCC(C)(O)CCC	0.449
45.288	45.25	Test	453.15	CCCCC(O)C(C)CC	0.038
45.705	45.66	Test	457.15	CCCCC(O)CC(C)C	0.045
39.708	39.73	Train	453.53	CCCc1ccc(C)cc1	0.022
39.573	39.05	Test	452.15	CCCC(CCC)C(C)CC	0.523
39.114	38.53	Train	447.15	CCCC(CCC)CC(C)C	0.584
39.089	38.94	Train	451.15	CCCC(C)(CCC)CCC	0.149
40.833	40.6	Train	468.15	CCCCC(C)(CCC)CCC	0.233
40.451	40.18	Train	464.15	CCCCC(CCC)CC(C)C	0.271
41.024	40.8	Train	470.15	CCCCC(CCC)C(C)CC	0.224
48.365	48.58	Train	515.15	CCCc1ccc(O)c(C)c1	0.215
50.313	50.63	Train	535	CCCc1ccc(O)cc1C	0.317
41.362	41.34	Test	470.15	CCC(C)c1ccc(C)cc1	0.022
40.2	40.9	Train	465.91	Cc1ccc(C(C)(C)C)cc1	0.7
41.119	40.91	Test	471.15	CCCC(C)(CCC)C(C)(C)C	0.209
39.878	39.56	Test	458.15	CCCC(CC(C)C)C(C)(C)C	0.318
40.355	40.08	Train	463.15	CCCC(C(C)CC)C(C)(C)C	0.275
41.119	40.91	Train	471.15	CCC(CC)(CC)CCC(C)C	0.209
41.215	41.01	Train	472.15	CCC(C)CC(CC)(CC)CC	0.205
46.449	46.41	Train	466	CCC(O)C(C)C(CC)CC	0.039
48.045	48.74	Train	543.15	CCc1cccc2c(C)cccc12	0.695
48.045	48.74	Train	543.15	CCc1cccc2cc(C)ccc12	0.695
40.833	40.6	Train	468.15	CCCCC(CC)CC(C)CC	0.233
40.928	40.7	Train	469.15	CCCCC(CC)CCC(C)C	0.228
41.119	40.91	Test	471.15	CCCCC(CC)C(C)CCC	0.209
41.119	40.91	Train	471.15	CCCCC(C)(CC)CCCC	0.209
39.481	38.94	Train	451.15	CCCC(CC)CCC(C)C	0.541
39.664	39.15	Train	453.15	CCCC(C)C(CC)CCC	0.514
39.298	38.74	Train	449.15	CCCC(CC)CC(C)CC	0.558
47.49	48.13	Train	509.15	CCc1cc(C)cc(O)c1	0.64
46.682	47.27	Test	500.85	CCc1ccc(C)c(O)c1	0.588
40.737	40.49	Test	467.15	CCCC(C)C(CCC)C(C)C	0.247
40.546	40.29	Train	465.15	CCCC(CC(C)CC)C(C)C	0.256
40.451	40.18	Train	464.15	CCCC(CCC(C)C)C(C)C	0.271
47.422	48.07	Train	510.15	Cc1ccc(C(C)C)cc1O	0.648
47.81	48.48	Train	514.15	Cc1cc(O)cc(C(C)C)c1	0.67
48.574	48.06	Train	482	CCCCC(O)CCC(C)C	0.514
48.574	48.06	Train	482	CCCCC(O)CC(C)CC	0.514
48.058	48.06	Train	482	CCCCC(C)(O)CCCC	0.002
40.928	40.7	Train	469.15	CCCC(C)C(CCC)CCC	0.228
40.737	40.49	Train	467.15	CCCC(CCC)CC(C)CC	0.247
40.451	40.18	Test	464.15	CCCC(CCC)CCC(C)C	0.271
48.35	48.57	Train	515	CCCc1ccc(C)c(O)c1	0.22
49.935	50.23	Train	531.15	CCCc1cc(C)cc(O)c1	0.295
50.99	48.74	Train	543.16	CCc1ccc2cc(C)ccc2c1	2.25
48.336	49.05	Train	546.15	CCc1ccc2c(C)cccc2c1	0.714
41.119	40.91	Train	471.15	CCCC(CC)CCCC(C)C	0.209
40.928	40.7	Train	469.15	CCCC(C)CC(CC)CCC	0.228
41.215	41.01	Test	472.15	CCCC(CC)CCC(C)CC	0.205
39.664	39.15	Train	453.15	CCCC(C)CC(CC)CC	0.514
39.848	39.36	Train	455.15	CCC(C)CCC(CC)CC	0.488
39.848	39.36	Train	455.15	CCC(CC)CCCC(C)C	0.488
46.341	46.91	Train	497.35	CCc1ccc(C)cc1O	0.569
45.349	45.86	Train	487.15	CCc1cccc(C)c1O	0.511
52.148	53.01	Train	585.41	Cc1cccc2cc(C(C)C)ccc12	0.862
48.35	48.57	Train	515	CCCc1cccc(C)c1O	0.22
48.142	48.84	Test	544.15	CCc1ccc2cccc(C)c2c1	0.698
50.99	48.74	Train	543.16	CCc1ccc2ccc(C)cc2c1	2.25
41.502	41.32	Train	475.15	CCC(CC)CCCCC(C)C	0.182
41.31	41.11	Train	473.15	CCC(C)CCCC(CC)CC	0.2
41.31	41.11	Train	473.15	CCCC(C)CCC(CC)CC	0.2
49.111	49.78	Train	554.15	Cc1cccc2ccc(C(C)C)cc12	0.669
48.045	48.74	Train	543.15	CCc1cccc2ccc(C)cc12	0.695
48.529	49.25	Train	548.15	CCc1cccc2cccc(C)c12	0.721
49.207	49.88	Train	555.15	Cc1ccc2cccc(C(C)C)c2c1	0.673
22.25	19.79	Test	249.94	C#CC	2.46
27.79	29.53	Test	315	COCOC	1.74
43.14	43.2	Train	470.65	Cc1cc2ccccc2o1	0.06
46.624	47.38	Train	528.45	Cc1ccccc1-c1ccccc1	0.756
48.045	48.77	Train	543.15	Cc1ccc(-c2ccccc2)cc1	0.725
48.306	49.04	Test	545.85	Cc1cccc(-c2ccccc2)c1	0.734
32.502	32.91	Train	365.75	CC(C)CC=O	0.408
32.446	32.85	Test	365.15	CCC(C)C=O	0.404
43.22	46.88	Train	448.25	CC(C)CC(=O)O	3.66
36.88	38.68	Train	413.15	CCC(C)COC(C)=O	1.8
36.229	37.96	Train	406.15	CCCC(C)OC(C)=O	1.731
43.816	42.71	Train	455.15	CCCC(=O)OC(C)CCC	1.106
41.638	42.4	Train	452.15	CCCC(=O)OCCC(C)C	0.762
41.509	42.4	Train	452.15	CCCC(=O)OCC(C)CC	0.891
34.454	36.86	Train	393.76	CCC(C)COC=O	2.406
34.71	36.86	Train	393.76	CCCC(C)OC=O	2.15
42.198	41.31	Train	440.22	CCCC(C)OC(=O)CC	0.888
40.577	41.32	Train	440.22	CCC(=O)OCC(C)CC	0.743
46.58	47.07	Train	450.15	CCC(C)C(=O)O	0.49
36.433	37.04	Train	429.25	CCC1CCCCC1C	0.607
33.988	34.26	Train	401.2	CCC1CCCC1C	0.272
28.679	28.24	Train	340.16	CCC1CC1C	0.439
33.455	33.45	Train	391.15	CC=CCC(C)CC	0.005
33.096	33.04	Train	387.15	CC=CC(C)CCC	0.056
33.365	33.35	Train	390.15	CC=CCCC(C)C	0.015
33.856	33.86	Train	395.15	CC=C(C)CCCC	0.004
30.434	30.31	Train	359.46	CC=CC(C)CC	0.124
31.446	31.44	Train	370.41	CC=C(C)CCC	0.006
30.718	30.64	Test	362.65	CC=CCC(C)C	0.078
35.659	36.2	Train	421.15	CC(C)C1CCCC1C	0.541
28.92	28.53	Train	340.85	CC=C(C)CC	0.39
27.51	27.37	Train	329.53	CC=CC(C)C	0.14
36.387	36.67	Train	425.73	CCCC1CCCC1C	0.283
35.712	36.2	Train	421.15	CCC1CCCC(C)C1	0.488
33.37	33.55	Test	394.25	CCC1CCC(C)C1	0.18
32.917	32.83	Train	385.15	CCC=CC(C)CC	0.087
32.917	32.83	Train	385.15	CCCC=CC(C)C	0.087
33.856	33.86	Train	395.15	CCC=C(C)CCC	0.004
33.766	33.76	Train	394.15	CCCC=C(C)CC	0.006
33.186	33.14	Train	388.15	CCC=CCC(C)C	0.046
30.407	30.28	Train	359.15	CCC=CC(C)C	0.127
31.28	31.25	Train	368.55	CCC=C(C)CC	0.03
35.126	35.58	Train	415.15	CC1CCC(C(C)C)C1	0.454
35.976	36.2	Train	421.15	CCCC1CCC(C)C1	0.224
35.979	36.51	Train	424.15	CCC1CCC(C)CC1	0.531
44.429	45.79	Test	516.15	CC1CCCC2CCCCC12	1.361
41.995	43	Test	489.15	CC1CCC2CCCCC2C1	1.005
41.905	42.9	Train	488.15	CC12CCCCC1CCCC2	0.995
25.428	24.61	Train	303.45	CC1CCC1	0.818
31.82	31.59	Train	374.08	CC1CCCCC1	0.23
46.6	44.38	Train	439.65	CC1CCCCC1O	2.22
48.43	44.84	Train	444.15	CC1CCC(O)CC1	3.59
48.6	44.84	Train	444.15	CC1CCC(O)CC1	3.76
47.02	44.54	Test	441.15	CC1CCCC(O)C1	2.48
47.41	44.53	Train	441.15	CC1CCCC(O)C1	2.88
45.95	43.4	Train	430.15	CC1(O)CCCCC1	2.55
46.17	44.23	Train	438.15	CC1CCCCC1O	1.94
32.466	32.92	Train	383.45	CC1=CCCCC1	0.454
31.772	32.11	Train	375.62	CC1C=CCCC1	0.338
31.795	32.14	Train	375.89	CC1CC=CCC1	0.345
30.04	29.23	Train	345.93	CC1=CC=CC1	0.81
29.34	28.73	Train	344.96	CC1CCCC1	0.61
28.87	28.91	Train	343.16	CC1C=CCC1	0.04
29.05	29.51	Train	348.95	CC1=CCCC1	0.46
29.31	29.44	Train	348.31	CC1CC=CC1	0.13
22.893	21.76	Train	273.88	CC1CC1	1.133
40.756	39.97	Train	461.05	CCCCCCC(C)CCC	0.786
40.875	40.1	Train	462.34	CCCCCCCCC(C)C	0.775
40.95	40.18	Test	463.15	CCCCCCCC(C)CC	0.77
40.58	39.77	Train	459.15	CCCCCC(C)CCCC	0.81
49.062	49.76	Train	553.65	Cc1ccccc1Cc1ccccc1	0.698
48.94	49.62	Test	552.39	Cc1cccc(Cc2ccccc2)c1	0.68
49.204	49.91	Train	555.11	Cc1ccc(Cc2ccccc2)cc1	0.706
44.139	44.06	Train	502.65	CCCCCCCCCCC(C)C	0.079
44.216	44.15	Train	503.45	CCCCCCCCCC(C)CC	0.066
41.202	47.43	Train	453.15	C=C(CC)C(=O)O	6.228
29.372	30.2	Test	337.85	Cc1ccco1	0.828
29.56	30.28	Test	338.65	Cc1ccoc1	0.72
52.123	52.14	Train	585.15	CCCCCCCCCCCCCCCC(C)C	0.017
52.22	52.24	Train	586.15	CCCCCCCCCCCCCCC(C)CC	0.02
33.44	33.05	Train	390.8	CCCCCC(C)C	0.39
33.88	33.06	Train	390.86	CCCC(C)CCC	0.82
34.04	33.19	Train	392.08	CCCCC(C)CC	0.85
50.663	50.68	Train	570.15	CCCCCCCCCCCCCCC(C)C	0.017
50.761	50.78	Test	571.15	CCCCCCCCCCCCCC(C)CC	0.019
31.19	30.52	Train	365	CCCC(C)CC	0.67
31.17	30.33	Train	363.2	CCCCC(C)C	0.84
42.06	41.63	Train	471.65	CC1C=Cc2ccccc21	0.43
40.65	40.22	Train	458	CC1=Cc2ccccc2C1	0.43
46.28	45.95	Train	514.2	Cc1ccc2ccccc2c1	0.33
45.82	46.32	Train	517.83	Cc1cccc2ccccc12	0.5
54.855	54.87	Train	613.15	CCCCCCCCCCCCCCCCC(C)CC	0.015
54.757	54.77	Train	612.15	CCCCCCCCCCCCCCCCCC(C)C	0.013
38.11	38	Test	440.95	CCCCCCC(C)CC	0.11
38.14	37.92	Train	440.15	CCCCCCCC(C)C	0.22
38.51	37.78	Train	438.85	CCCCCC(C)CCC	0.73
37.98	37.73	Train	438.3	CCCCC(C)CCCC	0.25
53.585	53.61	Train	600.15	CCCCCCCCCCCCCCCC(C)CC	0.025
53.487	53.51	Train	599.15	CCCCCCCCCCCCCCCCC(C)C	0.023
36.43	35.58	Train	416.43	CCCCCCC(C)C	0.85
36.4	35.68	Train	417.38	CCCCCC(C)CC	0.72
36.19	35.49	Train	415.59	CCCCC(C)CCC	0.7
49.207	49.21	Train	555.15	CCCCCCCCCCCCC(C)CC	0.003
49.169	49.17	Train	554.75	CCCCCCCCCCCCCC(C)C	0.001
35.445	35.76	Train	395.15	CC(C)CCC=O	0.315
35.445	35.76	Test	395.15	CCC(C)CC=O	0.315
34.976	35.24	Test	390.15	CCCC(C)C=O	0.264
28.26	27.72	Train	336.42	CCC(C)CC	0.54
27.94	27.41	Test	333.41	CCCC(C)C	0.53
39.46	39.09	Test	445.93	C=Cc1ccc(C)cc1	0.37
40.06	38.78	Train	442.96	C=Cc1ccccc1C	1.28
39.42	38.97	Train	444.75	C=Cc1cccc(C)c1	0.45
47.581	47.56	Train	538.35	CCCCCCCCCCCCC(C)C	0.021
47.687	47.68	Train	539.45	CCCCCCCCCCCC(C)CC	0.007
35.606	37.69	Train	411.15	CC1CCOC1	2.084
30.43	31.72	Train	353.37	CC1CCCO1	1.29
36.041	36.58	Train	424.85	CCC1CCCCC1C	0.539
33.379	33.56	Test	394.35	CCC1CCCC1C	0.181
27.941	27.37	Train	331.81	CCC1CC1C	0.571
33.856	33.86	Train	395.15	CC=C(C)CCCC	0.004
33.096	33.04	Train	387.15	CC=CC(C)CCC	0.056
33.455	33.45	Train	391.15	CC=CCC(C)CC	0.005
33.365	33.35	Train	390.15	CC=CCCC(C)C	0.015
31.261	31.23	Train	368.33	CC=C(C)CCC	0.031
30.594	30.5	Train	361.26	CC=CCC(C)C	0.094
30.545	30.44	Train	360.71	CC=CC(C)CC	0.105
35.038	35.48	Train	414.15	CC(C)C1CCCC1C	0.442
29.29	28.82	Test	343.6	CC=C(C)CC	0.47
27.85	27.59	Train	331.75	CC=CC(C)C	0.26
35.83	36.03	Train	419.52	CCCC1CCCC1C	0.2
35.979	36.51	Train	424.15	CCC1CCCC(C)C1	0.531
33.37	33.55	Train	394.25	CCC1CCC(C)C1	0.18
33.856	33.86	Train	395.15	CCC=C(C)CCC	0.004
33.186	33.14	Train	388.15	CCC=CCC(C)C	0.046
32.917	32.83	Test	385.15	CCC=CC(C)CC	0.087
33.766	33.76	Test	394.15	CCCC=C(C)CC	0.006
32.917	32.83	Train	385.15	CCCC=CC(C)C	0.087
30.398	30.27	Train	359.05	CCC=CC(C)C	0.128
31.115	31.06	Test	366.69	CCC=C(C)CC	0.055
35.126	35.58	Train	415.15	CC1CCC(C(C)C)C1	0.454
35.976	36.2	Train	421.15	CCCC1CCC(C)C1	0.224
35.712	36.2	Train	421.15	CCC1CCC(C)CC1	0.488
43.707	44.97	Train	508.15	CC1CCCC2CCCCC12	1.263
41.006	41.87	Train	478.15	CC12CCCCC1CCCC2	0.864
41.275	42.18	Train	481.15	CC1CCC2CCCCC2C1	0.905
45.91	45.87	Test	521.05	CCCCCCCCCCCC(C)C	0.04
45.987	45.95	Train	521.85	CCCCCCCCCCC(C)CC	0.037
41.884	41.73	Train	479.15	CCCCCCC(C)CCCC	0.154
41.884	41.73	Test	479.15	CCCCCC(C)CCCCC	0.154
42.172	42.04	Train	482.15	CCCCCCCC(C)CCC	0.132
42.268	42.15	Train	483.15	CCCCCCCCC(C)CC	0.118
42.268	42.15	Train	483.15	CCCCCCCCCC(C)C	0.118
43.42	43.67	Test	491.14	c1ccc2ccccc2c1	0.25
22.74	22.33	Train	282.65	CC(C)(C)C	0.41
35.017	37.45	Train	401.15	CC(=O)OCC(C)(C)C	2.433
62.15	55.25	Train	483	CC(C)(CO)CO	6.9
64.776	64.64	Train	713.95	CCCCCCCCCCCCCCCCCCCCCCCCCCCCC	0.136
64.697	64.6	Test	713.15	C=CCCCCCCCCCCCCCCCCCCCCCCCCCCC	0.097
69.763	69.55	Test	764.15	CCCCCCCCCCCCCCCCCCCCCCCCCCCCCc1ccccc1	0.213
70.161	69.98	Train	768.15	CCCCCCCCCCCCCCCCCCCCCCCCCCCCCC1CCCCC1	0.181
69.364	69.22	Train	760.15	CCCCCCCCCCCCCCCCCCCCCCCCCCCCCC1CCCC1	0.144
64.4	64.29	Train	710.15	C#CCCCCCCCCCCCCCCCCCCCCCCCCCCC	0.11
55.834	54.58	Train	623.15	CCCCCCCCCCCCCCCCCCC=O	1.254
56.07	53.91	Train	603.05	CCCCCCCCCCCCCCCCCCC	2.16
64.499	74.24	Train	711.15	CCCCCCCCCCCCCCCC(O)CCCO	9.741
62.423	70.75	Train	690.15	CCCCCCCCCCCCCCCCC(O)CCO	8.327
61.337	69.61	Train	679.15	CCCCCCCCCCCCCCCCCC(O)CO	8.273
65.89	63.18	Train	659.15	CCCCCCCCCCCCCCCCCCC(=O)O	2.71
70.53	59.01	Train	631	CCCCCCCCCCCCCCCCCCCO	11.52
56.225	58.73	Train	627.15	CCCCCCCCCCCCCCCCCC(C)O	2.505
55.148	53.85	Train	616.15	CCCCCCCCCCCCCCCCCC(C)=O	1.298
67.172	67.45	Train	738.1	CCCCCCCCCCCCCCCCCCCOC(C)=O	0.278
71.728	72.01	Train	783.86	CCCCCCCCCCCCCCCCCCCOC(=O)CCC	0.282
64.833	65.1	Train	714.52	CCCCCCCCCCCCCCCCCCCOC=O	0.267
69.447	69.73	Test	760.98	CCCCCCCCCCCCCCCCCCCOC(=O)CC	0.283
61.732	61.85	Train	683.15	CCCCCCCCCCCCCCCCCCCc1ccccc1	0.118
61.929	62.07	Train	685.15	CCCCCCCCCCCCCCCCCCCC1CCCCC1	0.141
60.745	60.9	Train	673.15	CCCCCCCCCCCCCCCCCCCC1CCCC1	0.155
54.757	54.9	Train	612.15	CC#CCCCCCCCCCCCCCCCC	0.143
53.585	53.66	Train	600.15	CCC#CCCCCCCCCCCCCCCC	0.075
57.46	53.66	Train	600.16	C#CCCCCCCCCCCCCCCCCC	3.8
85.729	84.03	Train	923.15	CCCCCCCCCCCCCCCCCCCCCCCCCCCCCCCCCCCCCCCCCCCCCCCCCCCCCCCCCCCCCCCCCCCCC	1.699
44.25	42.53	Train	468.15	CCCCCCCCC=O	1.72
37.15	36.36	Train	423.97	CCCCCCCCC	0.79
66.557	61.82	Train	558.15	OCCCCCCCCCO	4.737
67.581	64.45	Train	571.15	CCCCCC(O)CCCO	3.131
63.665	59.55	Train	539.15	CCCCCCCC(O)CO	4.115
65.01	61	Train	550.15	CCCCCCC(O)CCO	4.01
57.71	53.95	Train	528.75	CCCCCCCCC(=O)O	3.76
51.34	48.35	Train	486.25	CCCCCCCCCO	2.99
47.279	46.76	Train	467.85	CCCCCCC(O)CC	0.519
47.1	46.59	Test	466.15	CCCCCC(O)CCC	0.51
47.321	46.81	Train	468.25	CCCCC(O)CCCC	0.511
51.58	46.84	Train	471.65	CCCCCCCC(C)O	4.74
43.018	42.43	Test	467.15	CCCCCCCC(C)=O	0.588
72.456	71.98	Train	791.15	CCCCCCCCCCCCCCCCCCCCCCCCCCCCCCCCCCCCCCC	0.476
[truncated: 863 more rows]

## Sheet: Literature_1_GAT
HoV (kJ/mol)	Pred_ours	Train/Valid/Test	temperature	smiles	AE
25.08	25.5755	Train	305.4	C#CC(=C)C	0.495525
25.479	26.0022	Train	310.87	C#CC(C)(C)C	0.523249
26.02	25.7332	Train	302.15	C#CC(C)C	0.286771
29.558	30.1927	Train	353.15	C#CC(C)C(C)C	0.63467
27.7	28.3364	Train	330.85	C#CC(C)CC	0.636409
30.173	30.7745	Train	357.15	C#CC(CC)CC	0.601515
24.52	23.8407	Train	281.22	C#CCC	0.679279
28.934	29.6472	Train	349.23	C#CCC(C)(C)C	0.713188
28.005	28.6956	Train	334.32	C#CCC(C)C	0.690616
30.793	31.4057	Train	364.15	C#CCC(C)CC	0.612684
27.32	27.1733	Train	313.33	C#CCCC	0.146664
30.869	31.5951	Train	365	C#CCCC(C)C	0.726076
30.45	30.141	Train	344.48	C#CCCCC	0.308965
35.314	35.5053	Train	399.35	C#CCCCCCC	0.19131
37.12	38.0312	Train	423.96	C#CCCCCCCC	0.91122
39.65	40.3284	Train	447.16	C#CCCCCCCCC	0.67838
44.38	43.8821	Train	488.16	C#CCCCCCCCCCC	0.497905
46.306	47.5954	Train	525.15	C#CCCCCCCCCCCCC	1.28943
50.87	49.1851	Train	541.16	C#CCCCCCCCCCCCCC	1.68486
52.8	50.7457	Train	557.16	C#CCCCCCCCCCCCCCC	2.05428
54.58	52.1955	Train	572.16	C#CCCCCCCCCCCCCCCC	2.38449
56.1	53.545	Train	586.16	C#CCCCCCCCCCCCCCCCC	2.55504
57.46	54.8832	Train	600.16	C#CCCCCCCCCCCCCCCCCC	2.5768
58.53	56.1237	Train	613.16	C#CCCCCCCCCCCCCCCCCCC	2.40625
56.225	57.4411	Train	627.15	C#CCCCCCCCCCCCCCCCCCCC	1.21605
57.402	58.5792	Train	639.15	C#CCCCCCCCCCCCCCCCCCCCC	1.17724
58.58	59.7118	Train	651.15	C#CCCCCCCCCCCCCCCCCCCCCC	1.13182
59.662	60.7498	Train	662.15	C#CCCCCCCCCCCCCCCCCCCCCCC	1.08781
60.647	61.6964	Train	672.15	C#CCCCCCCCCCCCCCCCCCCCCCCC	1.04943
61.633	62.6348	Train	682.15	C#CCCCCCCCCCCCCCCCCCCCCCCCC	1.00182
62.62	63.5635	Train	692.15	C#CCCCCCCCCCCCCCCCCCCCCCCCCC	0.94346
64.4	65.2381	Train	710.15	C#CCCCCCCCCCCCCCCCCCCCCCCCCCCC	0.83812
66.184	66.9007	Train	728.15	C#CCCCCCCCCCCCCCCCCCCCCCCCCCCCCC	0.71669
66.978	67.635	Train	736.15	C#CCCCCCCCCCCCCCCCCCCCCCCCCCCCCCC	0.65699
67.773	68.3659	Train	744.15	C#CCCCCCCCCCCCCCCCCCCCCCCCCCCCCCCC	0.59289
68.469	69.0106	Train	751.15	C#CCCCCCCCCCCCCCCCCCCCCCCCCCCCCCCCC	0.54164
69.265	69.7397	Train	759.15	C#CCCCCCCCCCCCCCCCCCCCCCCCCCCCCCCCCC	0.47473
69.962	70.3825	Train	766.15	C#CCCCCCCCCCCCCCCCCCCCCCCCCCCCCCCCCCC	0.42046
70.66	71.0218	Train	773.15	C#CCCCCCCCCCCCCCCCCCCCCCCCCCCCCCCCCCCC	0.361774
71.358	71.6599	Train	780.15	C#CCCCCCCCCCCCCCCCCCCCCCCCCCCCCCCCCCCCC	0.30192
71.957	72.2121	Train	786.15	C#CCCCCCCCCCCCCCCCCCCCCCCCCCCCCCCCCCCCCC	0.25509
72.656	72.849	Train	793.15	C#CCCCCCCCCCCCCCCCCCCCCCCCCCCCCCCCCCCCCCC	0.19295
42.33	42.0962	Train	386.75	C#CCO	0.233778
36.13	38.0144	Train	418.36	C#Cc1ccccc1	1.88438
50.94	52.385	Train	573	C(#Cc1ccccc1)c1ccccc1	1.44501
48	48.4143	Train	535	C(=Cc1ccccc1)c1ccccc1	0.414345
73.07	71.0148	Train	607	C/C(=C/C(=O)O)C(=O)O	2.05523
34.81	34.2162	Train	377.25	C/C=C/C=O	0.59384
37.31	38.6807	Train	443	C1=CC2C3C=CC(C3)C2C1	1.37068
30.14	31.2895	Train	368.65	C1=CC2CCC1C2	1.14949
36.4	36.2443	Train	413.16	C1=CC=CC=CC=C1	0.155703
35.32	33.9913	Train	388.65	C1=CC=CCC=C1	1.3287
25.76	27.3445	Train	314.65	C1=CCC=C1	1.58453
27.6	26.9492	Train	317.38	C1=CCCC1	0.650806
30.59	30.8397	Train	353.49	C1=CCCC=C1	0.249712
37.45	37.1795	Train	423.27	C1=CCCC=CCC1	0.270457
31.11	30.8112	Train	356.12	C1=CCCCC1	0.298837
30.39	30.6008	Train	339	C1=CCOC1	0.210838
40.94	41.0061	Train	455.77	C1=Cc2ccccc2C1	0.06608
20.08	20.1981	Train	240.37	C1CC1	0.118063
26.74	26.706	Train	312.19	C1CC12CC2	0.034008
46.383	45.8555	Train	525.95	C1CCC(CC2CCCCC2)CC1	0.52754
23.98	23.8584	Train	285.66	C1CCC1	0.12164
39.8	40.5155	Train	468.97	C1CCC2CCCCC2C1	0.715465
27.26	26.8129	Train	322.4	C1CCCC1	0.447101
29.89	29.4542	Train	353.87	C1CCCCC1	0.435774
33.55	33.4919	Train	391.94	C1CCCCCC1	0.058053
35.92	36.9241	Train	424.3	C1CCCCCCC1	1.00412
40.704	42.3173	Train	475.15	C1CCCCCCCCC1	1.61332
45.053	46.0396	Train	512.15	C1CCCCCCCCCCC1	0.986642
48.142	48.9025	Train	544.15	C1CCCCCCCCCCCCC1	0.76048
49.595	50.2445	Train	559.15	C1CCCCCCCCCCCCCC1	0.64947
50.955	51.497	Train	573.15	C1CCCCCCCCCCCCCCC1	0.541998
53.39	53.7336	Train	598.15	C1CCCCCCCCCCCCCCCCC1	0.34359
54.562	54.8071	Train	610.15	C1CCCCCCCCCCCCCCCCCC1	0.24513
55.638	55.7913	Train	621.15	C1CCCCCCCCCCCCCCCCCCC1	0.153267
30.26	29.8665	Train	338	C1CCOC1	0.3935
25.7	26.0955	Train	283.85	C1CO1	0.39551
28.54	28.6859	Train	321	C1COC1	0.145925
34.3	34.8063	Train	374.47	C1COCCO1	0.50634
37.48	37.3147	Train	387.65	C1COOOC1	0.165303
31.747	32.14	Train	377.15	C=C(C(C)C)C(C)C	0.393034
22.21	21.2322	Train	266.25	C=C(C)C	0.977767
28.91	29.1756	Train	341.93	C=C(C)C(=C)C	0.265585
34.3	34.1689	Train	373.45	C=C(C)C(=O)OC	0.131085
34.38	35.4952	Train	390.15	C=C(C)C(=O)OCC	1.11523
37.63	37.6213	Train	414	C=C(C)C(=O)OCCC	0.008693
40.2	39.5733	Train	434	C=C(C)C(=O)OCCCC	0.626674
31.816	32.2818	Train	381.46	C=C(C)C(C)(C)CC	0.46581
32.66	33.0165	Train	371.15	C=C(C)C(C)=O	0.35654
27.47	27.7847	Train	328.76	C=C(C)C(C)C	0.314708
32.047	32.4639	Train	381.15	C=C(C)C(C)C(C)C	0.416913
30.096	30.4445	Train	357.43	C=C(C)C(C)CC	0.34848
32.61	32.8999	Train	383.65	C=C(C)C(C)CCC	0.28994
32.566	32.8658	Train	383.15	C=C(C)C(CC)CC	0.29979
29.297	29.7646	Train	349.15	C=C(C)C=CC	0.46761
29.297	29.7646	Train	349.15	C=C(C)C=CC	0.467605
29.74	30.8957	Train	341.15	C=C(C)C=O	1.15573
25.58	25.5431	Train	304.3	C=C(C)CC	0.036894
32.673	32.9627	Train	384.35	C=C(C)CC(C)CC	0.289692
28.35	28.6763	Train	335.25	C=C(C)CCC	0.326294
32.708	33.0181	Train	384.75	C=C(C)CCC(C)C	0.31009
31.08	31.5132	Train	364.99	C=C(C)CCCC	0.433231
33.696	34.1784	Train	392.45	C=C(C)CCCCC	0.482364
36.209	36.6714	Train	417.8	C=C(C)CCCCCC	0.462402
38.616	39.1302	Train	441.55	C=C(C)CCCCCCC	0.514203
40.921	41.3586	Train	463.85	C=C(C)CCCCCCCC	0.437624
44.312	45.082	Train	504.45	C=C(C)CCCCCCCCCC	0.770047
46.113	46.9795	Train	523.15	C=C(C)CCCCCCCCCCC	0.866538
49.401	50.3942	Train	557.15	C=C(C)CCCCCCCCCCCCC	0.993173
50.955	51.952	Train	573.15	C=C(C)CCCCCCCCCCCCCC	0.996996
53.78	54.75	Train	602.15	C=C(C)CCCCCCCCCCCCCCCC	0.969954
55.051	56.0031	Train	615.15	C=C(C)CCCCCCCCCCCCCCCCC	0.952098
40.43	40.8714	Train	459.15	C=C(C)c1ccc(C)cc1	0.4414
40.338	40.7938	Train	458.15	C=C(C)c1cccc(C)c1	0.45578
38.54	39.3349	Train	438.65	C=C(C)c1ccccc1	0.79487
39.159	39.7413	Train	445.35	C=C(C)c1ccccc1C	0.582318
41.202	44.6902	Train	453.15	C=C(CC)C(=O)O	3.48816
31.964	32.4565	Train	383.15	C=C(CC)C(C)(C)C	0.492493
30.28	30.6532	Train	359.51	C=C(CC)C(C)C	0.373168
32.7	32.9654	Train	384.65	C=C(CC)C(C)CC	0.265366
28.35	28.8594	Train	337.82	C=C(CC)CC	0.509365
32.593	32.9013	Train	383.45	C=C(CC)CC(C)C	0.30826
31.33	31.6676	Train	367.15	C=C(CC)CCC	0.337633
34.11	34.1924	Train	393.15	C=C(CC)CCCC	0.08241
32.833	33.1743	Train	386.15	C=C(CCC)C(C)C	0.34132
33.552	33.9589	Train	390.85	C=C(CCC)CCC	0.40689
48.733	50.0794	Train	550.25	C=C(c1ccccc1)c1ccccc1	1.34641
36.32	36.9292	Train	433.65	C=C1C2CCC(C2)C1(C)C	0.60923
39.5	38.465	Train	447.15	C=C1C=CC(C(C)C)CC1	1.03504
38.82	39.5246	Train	399.2	C=C1CC(=O)O1	0.70463
37.83	37.4413	Train	439.19	C=C1CCC2CC1C2(C)C	0.388735
20.6	18.539	Train	238.65	C=C=C	2.06103
26.66	26.3764	Train	314	C=C=C(C)C	0.283625
28.856	29.3593	Train	343.15	C=C=C(C)CC	0.50331
24.22	23.6645	Train	284	C=C=CC	0.555539
26.89	27.255	Train	318.01	C=C=CCC	0.365024
29.609	30.233	Train	349.15	C=C=CCCC	0.623958
18.49	17.6336	Train	225.43	C=CC	0.856371
27.88	28.6865	Train	332.4	C=CC#CC	0.80645
29.277	29.9165	Train	348.15	C=CC(=C)CC	0.639513
42.52	42.2558	Train	414.15	C=CC(=O)O	0.264167
32.21	32.7137	Train	353.35	C=CC(=O)OC	0.50373
33.72	34.3319	Train	372.65	C=CC(=O)OCC	0.611852
37.56	36.9911	Train	405.15	C=CC(=O)OCC(C)C	0.568865
45.61	46.8463	Train	489.15	C=CC(=O)OCC(CC)CCCC	1.23632
36.51	35.9786	Train	392.15	C=CC(=O)OCCC	0.53142
37.46	38.7199	Train	421	C=CC(=O)OCCCC	1.2599
53.89	52.3734	Train	484	C=CC(=O)OCCO	1.51659
25.93	26.2643	Train	314.4	C=CC(C)(C)C	0.334303
31.489	32.0541	Train	378.15	C=CC(C)(C)C(C)C	0.565092
29.173	29.6474	Train	350.63	C=CC(C)(C)CC	0.474398
31.678	32.1854	Train	377.15	C=CC(C)(C)CCC	0.507356
32.383	32.8777	Train	385.15	C=CC(C)(CC)CC	0.494728
29.385	29.8546	Train	350.15	C=CC(C)=CC	0.469595
29.385	29.8546	Train	350.15	C=CC(C)=CC	0.469605
24.39	24.6884	Train	293.21	C=CC(C)C	0.298437
40.626	44.4449	Train	450	C=CC(C)C(=O)O	3.81894
31.401	31.9559	Train	377.15	C=CC(C)C(C)(C)C	0.554853
29.752	30.1876	Train	353.95	C=CC(C)C(C)C	0.435567
32.704	33.0221	Train	385.15	C=CC(C)C(C)CC	0.31807
27.481	28.155	Train	328.15	C=CC(C)C=C	0.674043
31.992	32.3544	Train	377.15	C=CC(C)CC(C)C	0.36244
30.73	30.7134	Train	357.05	C=CC(C)CCC	0.016558
32.909	33.2893	Train	384.15	C=CC(C)CCCC	0.38031
32.303	32.6817	Train	380.65	C=CC(CC)C(C)C	0.378686
30.68	30.72	Train	357.26	C=CC(CC)CC	0.039973
32.846	33.1374	Train	383.45	C=CC(CC)CCC	0.291447
29.323	29.9598	Train	349.45	C=CC=C(C)C	0.63678
26.57	27.0819	Train	315.17	C=CC=CC	0.51193
26.7	27.2653	Train	317.22	C=CC=CC	0.565299
29.253	29.9628	Train	346.15	C=CC=CCC	0.70977
29.253	29.9628	Train	346.15	C=CC=CCC	0.709763
29.03	30.1257	Train	325.84	C=CC=O	1.0957
40.049	43.2967	Train	442.15	C=CCC(=O)O	3.24768
28.74	29.2103	Train	345.67	C=CCC(C)(C)C	0.470316
31.96	32.4181	Train	380.35	C=CCC(C)(C)CC	0.45814
27.41	27.9233	Train	327.01	C=CCC(C)C	0.513277
30.62	30.9303	Train	359.88	C=CCC(C)CC	0.310254
33.07	33.3499	Train	385.95	C=CCC(C)CCC	0.279884
32.819	33.1072	Train	383.15	C=CCC(CC)CC	0.28818
24.49	25.3671	Train	299.11	C=CCC=C	0.877086
28.544	29.0978	Train	338.15	C=CCC=CC	0.553849
28.544	29.0979	Train	338.15	C=CCC=CC	0.553864
25.71	25.7784	Train	303.11	C=CCCC	0.068425
42.066	46.5858	Train	461.15	C=CCCC(=O)O	4.51978
31.546	32.099	Train	375.65	C=CCCC(C)(C)C	0.553022
30.419	30.9034	Train	358.46	C=CCCC(C)C	0.484364
28.64	29.3686	Train	336.63	C=CCCCC	0.728612
33.106	33.5607	Train	386.35	C=CCCCC(C)C	0.454665
31.74	32.2553	Train	366.79	C=CCCCCC	0.515333
34.39	34.956	Train	394.44	C=CCCCCCC	0.56595
39.36	39.8679	Train	443.75	C=CCCCCCCCC	0.50786
43.7	43.7068	Train	486.5	C=CCCCCCCCCCC	0.006795
49.34	49.2469	Train	541.61	C=CCCCCCCCCCCCCC	0.093082
52.03	50.8604	Train	558.02	C=CCCCCCCCCCCCCCC	1.1696
53.55	52.3655	Train	573.48	C=CCCCCCCCCCCCCCCC	1.18445
55.6	53.7704	Train	587.97	C=CCCCCCCCCCCCCCCCC	1.82956
57.53	56.4098	Train	615.54	C=CCCCCCCCCCCCCCCCCCC	1.12024
56.323	57.6088	Train	628.15	C=CCCCCCCCCCCCCCCCCCCC	1.2858
57.5	58.7468	Train	640.15	C=CCCCCCCCCCCCCCCCCCCCC	1.24676
58.679	59.8791	Train	652.15	C=CCCCCCCCCCCCCCCCCCCCCC	1.20009
59.76	60.9162	Train	663.15	C=CCCCCCCCCCCCCCCCCCCCCCC	1.15624
60.844	61.9492	Train	674.15	C=CCCCCCCCCCCCCCCCCCCCCCCC	1.10524
61.83	62.8911	Train	684.15	C=CCCCCCCCCCCCCCCCCCCCCCCCC	1.06107
62.818	63.8294	Train	694.15	C=CCCCCCCCCCCCCCCCCCCCCCCCCC	1.01141
63.708	64.6755	Train	703.15	C=CCCCCCCCCCCCCCCCCCCCCCCCCCC	0.96751
66.383	67.1946	Train	730.15	C=CCCCCCCCCCCCCCCCCCCCCCCCCCCCCC	0.81162
67.177	67.9364	Train	738.15	C=CCCCCCCCCCCCCCCCCCCCCCCCCCCCCCC	0.75941
67.972	68.6754	Train	746.15	C=CCCCCCCCCCCCCCCCCCCCCCCCCCCCCCCC	0.70339
68.767	69.413	Train	754.15	C=CCCCCCCCCCCCCCCCCCCCCCCCCCCCCCCCC	0.646
69.564	70.1493	Train	762.15	C=CCCCCCCCCCCCCCCCCCCCCCCCCCCCCCCCCC	0.585345
70.261	70.7966	Train	769.15	C=CCCCCCCCCCCCCCCCCCCCCCCCCCCCCCCCCCC	0.53564
70.959	71.4407	Train	776.15	C=CCCCCCCCCCCCCCCCCCCCCCCCCCCCCCCCCCCC	0.48174
71.657	72.0839	Train	783.15	C=CCCCCCCCCCCCCCCCCCCCCCCCCCCCCCCCCCCCC	0.42693
72.356	72.7262	Train	790.15	C=CCCCCCCCCCCCCCCCCCCCCCCCCCCCCCCCCCCCCC	0.37024
54.21	52.4576	Train	520	C=CCOC(=O)/C=C\C(=O)OCC=C	1.7524
33.53	34.5341	Train	377.15	C=CCOC(C)=O	1.00413
37.391	38.8166	Train	428.95	C=CCc1ccccc1	1.42557
31.31	31.91	Train	345.65	C=COC(C)=O	0.599956
26.76	27.3605	Train	301.45	C=COC=C	0.60054
32.9	32.8007	Train	366.97	C=COCCCC	0.099337
40.853	41.568	Train	465.57	C=Cc1cc(C)ccc1C	0.71497
40.909	41.6224	Train	466.18	C=Cc1cc(C)ccc1C	0.713356
40.853	41.5875	Train	465.57	C=Cc1ccc(C)cc1C	0.73449
41.744	42.4516	Train	475.26	C=Cc1ccc(C)cc1C	0.707553
40.904	41.4665	Train	465.45	C=Cc1ccc(CC)cc1	0.562476
39.42	39.8242	Train	444.75	C=Cc1cccc(C)c1	0.404234
41.95	42.2386	Train	472.65	C=Cc1cccc(C=C)c1	0.288552
36.62	37.8271	Train	418.31	C=Cc1ccccc1	1.20707
40.06	39.7659	Train	442.96	C=Cc1ccccc1C	0.294062
40.443	41.0896	Train	460.44	C=Cc1ccccc1CC	0.64657
23.16	24.0427	Train	254.05	C=O	0.882713
14.69	13.703	Train	184.55	CC	0.986953
26.43	25.2962	Train	300.13	CC#CC	1.13384
29.387	30.172	Train	356.15	CC#CC(C)(C)C	0.78498
28.91	29.5218	Train	346.28	CC#CC(C)C	0.611814
31.645	32.2721	Train	375.61	CC#CCC(C)C	0.627087
30.91	30.9737	Train	357.67	CC#CCCC	0.063738
32.775	33.614	Train	385.15	CC#CCCCC	0.839017
37.68	38.4538	Train	435.05	CC#CCCCCCC	0.77376
39.994	40.7494	Train	457.75	CC#CCCCCCCC	0.755367
42.224	42.6111	Train	479.15	CC#CCCCCCCCC	0.387137
43.802	44.4776	Train	499.15	CC#CCCCCCCCCC	0.6756
45.631	46.4214	Train	518.15	CC#CCCCCCCCCCC	0.790402
49.014	49.9407	Train	553.15	CC#CCCCCCCCCCCCC	0.92672
50.566	51.5135	Train	569.15	CC#CCCCCCCCCCCCCC	0.94754
53.39	54.3442	Train	598.15	CC#CCCCCCCCCCCCCCCC	0.9542
54.757	55.6924	Train	612.15	CC#CCCCCCCCCCCCCCCCC	0.93538
56.029	56.9441	Train	625.15	CC#CCCCCCCCCCCCCCCCCC	0.91513
45.74	44.6172	Train	438.15	CC(=O)C(=O)O	1.12284
32.071	32.9082	Train	379.45	CC(=O)C(C)(C)C	0.83719
33.72	32.5318	Train	367.55	CC(=O)C(C)C	1.18817
35.911	35.5259	Train	405.15	CC(=O)C(C)C(C)C	0.38506
36.09	35.6737	Train	402.95	CC(=O)C=C(C)C	0.41632
34.903	34.7545	Train	398.15	CC(=O)CC(C)(C)C	0.14854
40.83	39.3131	Train	413.55	CC(=O)CC(C)=O	1.51691
35.82	34.4235	Train	389.65	CC(=O)CC(C)C	1.39652
52.639	56.1977	Train	518.95	CC(=O)CCC(=O)O	3.55872
32.58	32.9887	Train	369.15	CC(=O)OC(C)(C)C	0.408693
40.83	40.6076	Train	411.78	CC(=O)OC(C)=O	0.222437
32.23	32.6827	Train	361.65	CC(=O)OC(C)C	0.452663
35.561	36.5034	Train	401.65	CC(=O)OC(C)C(C)C	0.942445
35.017	36.0601	Train	401.15	CC(=O)OCC(C)(C)C	1.04308
35.88	35.1813	Train	389.8	CC(=O)OCC(C)C	0.698676
37.6	37.3713	Train	415.25	CC(=O)OCCC(C)C	0.228708
45.37	47.0168	Train	463.65	CC(=O)OCCOC(C)=O	1.64684
44.25	44.3835	Train	475.15	CC(=O)c1ccccc1	0.13349
35.31	36.5461	Train	432.45	CC(C(C)(C)C)C(C)(C)C	1.23614
43.023	43.5901	Train	453	CC(C(C)(C)C)C(C)(C)O	0.567126
40.355	40.1531	Train	463.15	CC(C(C)C(C)(C)C)C(C)(C)C	0.20189
22.74	22.689	Train	282.65	CC(C)(C)C	0.050991
41.085	42.084	Train	436.95	CC(C)(C)C(=O)O	0.998992
31.42	31.6724	Train	379.6	CC(C)(C)C(C)(C)C	0.252375
38.4	40.3478	Train	467.15	CC(C)(C)C(C)(C)C(C)(C)C	1.94784
42.464	43.6908	Train	446	CC(C)(C)C(C)(C)CO	1.22678
38.066	38.6158	Train	404.15	CC(C)(C)C(C)(C)O	0.54983
41.75	42.2194	Train	440.15	CC(C)(C)C(O)C(C)(C)C	0.46939
54.012	53.746	Train	478.65	CC(C)(C)C(O)CO	0.265967
35.119	35.5992	Train	418	CC(C)(C)C1CCCC1	0.480243
32.54	33.2993	Train	395.44	CC(C)(C)CC(C)(C)C	0.759324
40.833	40.8857	Train	468.15	CC(C)(C)CC(C)(C)C(C)(C)C	0.05274
39.839	40.2263	Train	419.55	CC(C)(C)CC(C)(C)O	0.38735
42.319	42.3455	Train	443.15	CC(C)(C)CC(O)C(C)(C)C	0.02646
58.799	57.3107	Train	517.03	CC(C)(C)CC(O)CO	1.48826
33.102	32.9081	Train	377.15	CC(C)(C)CC=O	0.193858
35.27	34.7196	Train	410.63	CC(C)(C)CCC(C)(C)C	0.55044
36.7	37.1346	Train	436.15	CC(C)(C)CCCC(C)(C)C	0.43464
39.878	39.6011	Train	458.15	CC(C)(C)CCCCC(C)(C)C	0.276903
48.37	50.2013	Train	485	CC(C)(C)CCCCCCO	1.83128
44.988	46.6007	Train	455	CC(C)(C)CCCCCO	1.61271
44.705	46.0091	Train	455	CC(C)(C)CCCCO	1.30405
39.669	41.4898	Train	416.15	CC(C)(C)CCO	1.82077
41.35	39.4754	Train	386.25	CC(C)(C)CO	1.87464
33.771	35.0169	Train	390.97	CC(C)(C)COC=O	1.24586
40.11	36.0635	Train	355.57	CC(C)(C)O	4.04648
32.19	32.7682	Train	380.4	CC(C)(C)OC(C)(C)C	0.57824
39.921	39.3578	Train	405.5	CC(C)(C)OO	0.563212
33.58	33.7545	Train	384.15	CC(C)(C)OOC(C)(C)C	0.17453
61.15	58.3046	Train	558	CC(C)(C)c1ccc(O)c(O)c1	2.84541
49.023	49.458	Train	553.25	CC(C)(C)c1ccc2ccccc2c1	0.435046
46.853	48.9835	Train	513.15	CC(C)(C)c1cccc(O)c1	2.13052
48.849	49.1947	Train	551.45	CC(C)(C)c1cccc2ccccc12	0.345706
45.334	46.7699	Train	497.23	CC(C)(C)c1ccccc1O	1.43586
56.686	56.4511	Train	494.25	CC(C)(CCO)CCO	0.234912
56.686	57.2049	Train	494.25	CC(C)(CO)CCCO	0.51895
54.17	55.3088	Train	480	CC(C)(CO)CCO	1.1388
54.167	56.1251	Train	476.15	CC(C)(CO)CO	1.95815
62.15	57.085	Train	483	CC(C)(CO)CO	5.065
49.089	49.0121	Train	445.95	CC(C)(O)C(C)(C)O	0.076923
52.121	52.6809	Train	470	CC(C)(O)CC(C)(C)O	0.559878
56.686	58.1784	Train	494.25	CC(C)(O)CCCCO	1.49236
53.616	54.9125	Train	472.15	CC(C)(O)CCO	1.29646
50.808	53.075	Train	451.15	CC(C)(O)CO	2.26703
48.7	46.4367	Train	475.15	CC(C)(O)c1ccccc1	2.26332
52.99	52.2821	Train	589	CC(C)(c1ccccc1)C(C)(C)c1ccccc1	0.70786
49.129	49.6812	Train	554.34	CC(C)(c1ccccc1)c1ccccc1	0.552244
29.41	29.2733	Train	346.35	CC(C)=C(C)C	0.136717
32.792	33.1385	Train	389.41	CC(C)=C(C)C(C)C	0.34646
42.292	45.8025	Train	468.15	CC(C)=CC(=O)O	3.51046
31.93	31.8983	Train	378.06	CC(C)=CC(C)(C)C	0.03169
32.682	32.8769	Train	385.35	CC(C)=CCC(C)C	0.19487
35.97	35.0687	Train	397.55	CC(C)C(=O)C(C)C	0.901335
43.88	42.4734	Train	427.85	CC(C)C(=O)O	1.40659
40.737	40.6061	Train	467.15	CC(C)C(C(C)(C)C)C(C)(C)C	0.130883
37.354	38.0408	Train	443.15	CC(C)C(C(C)C)C(C)(C)C	0.68675
41.693	41.4734	Train	477.15	CC(C)C(C)(C(C)C)C(C)(C)C	0.219592
38.771	39.6247	Train	459.15	CC(C)C(C)(C(C)C)C(C)C	0.85369
44.025	43.9079	Train	456	CC(C)C(C)(C(C)C)C(C)O	0.117136
28.98	29.6184	Train	354.03	CC(C)C(C)(C)C	0.638391
36.36	37.26	Train	439.21	CC(C)C(C)(C)C(C)(C)C	0.899964
41.884	41.6707	Train	479.15	CC(C)C(C)(C)C(C)(C)C(C)C	0.213346
43.023	43.5444	Train	453	CC(C)C(C)(C)C(C)(C)O	0.52144
34.94	35.1531	Train	414.72	CC(C)C(C)(C)C(C)C	0.213065
42.141	42.5169	Train	438.15	CC(C)C(C)(C)C(C)O	0.37587
37.52	38.7111	Train	449.15	CC(C)C(C)(C)CC(C)(C)C	1.1911
39.973	39.7378	Train	459.15	CC(C)C(C)(C)CCC(C)(C)C	0.23523
43.151	43.2411	Train	444	CC(C)C(C)(C)CCO	0.090142
41.478	42.7591	Train	430.15	CC(C)C(C)(C)CO	1.28109
35.869	38.5088	Train	391.75	CC(C)C(C)(C)O	2.63983
44.598	45.2974	Train	466	CC(C)C(C)(CO)C(C)(C)C	0.699424
45.497	46.5112	Train	475	CC(C)C(C)(O)CC(C)(C)C	1.01417
54.17	54.2836	Train	480	CC(C)C(C)(O)CO	0.11356
34.21	34.3717	Train	406.18	CC(C)C(C)C(C)(C)C	0.161735
41.215	41.0009	Train	472.15	CC(C)C(C)C(C)(C)C(C)(C)C	0.214077
38.328	38.9894	Train	454.15	CC(C)C(C)C(C)(C)C(C)C	0.66142
41.439	41.7146	Train	431.15	CC(C)C(C)C(C)(C)O	0.275645
32.62	32.8461	Train	386.62	CC(C)C(C)C(C)C	0.22608
37.708	38.3614	Train	447.15	CC(C)C(C)C(C)C(C)(C)C	0.653362
36.86	36.6823	Train	429.36	CC(C)C(C)C(C)C(C)C	0.17771
39.878	39.8984	Train	458.15	CC(C)C(C)C(C)CC(C)(C)C	0.020354
44.873	45.1487	Train	456.15	CC(C)C(C)C(C)CO	0.27565
41.531	42.2181	Train	426.15	CC(C)C(C)C(C)O	0.687117
34.28	34.3198	Train	386.15	CC(C)C(C)C=O	0.039786
40.546	40.4965	Train	465.15	CC(C)C(C)CC(C)(C)C(C)C	0.04955
45.23	45.5665	Train	466	CC(C)C(C)CC(C)(C)O	0.336452
40.241	40.23	Train	461.95	CC(C)C(C)CC(C)C(C)(C)C	0.01096
38.508	38.6611	Train	448.15	CC(C)C(C)CC(C)C(C)C	0.153114
40.928	40.905	Train	469.15	CC(C)C(C)CCC(C)C(C)C	0.023047
40.451	40.3278	Train	464.15	CC(C)C(C)CCCC(C)(C)C	0.123153
45.2	45.2863	Train	455	CC(C)C(C)CCCO	0.086312
43.18	43.5114	Train	438.15	CC(C)C(C)CCO	0.331375
39.805	42.8154	Train	422.15	CC(C)C(C)CO	3.01039
41.1	39.3006	Train	384.65	CC(C)C(C)O	1.79942
34.794	35.5683	Train	393.32	CC(C)C(C)OC=O	0.774348
40.227	40.7084	Train	461.15	CC(C)C(C)c1ccccc1	0.481405
39.402	39.4044	Train	453.15	CC(C)C(CC(C)(C)C)C(C)C	0.00243
43.848	44.8621	Train	446.15	CC(C)C(CO)C(C)C	1.01408
59.008	58.7309	Train	508.21	CC(C)C(CO)CCO	0.277073
57.402	57.8214	Train	496.94	CC(C)C(CO)CO	0.419365
45.199	45.393	Train	467.65	CC(C)C(O)(C(C)C)C(C)C	0.194
40.737	41.2719	Train	424.15	CC(C)C(O)C(C)(C)C	0.534896
45.986	46.3225	Train	475	CC(C)C(O)C(C)(C)C(C)C	0.33648
51.462	51.1644	Train	459.15	CC(C)C(O)C(C)(C)O	0.29757
40.089	40.9985	Train	411.95	CC(C)C(O)C(C)C	0.909497
42.804	42.9743	Train	442	CC(C)C(O)CC(C)(C)C	0.17028
54.294	54.9497	Train	473.15	CC(C)C(O)CO	0.65569
35.755	35.9459	Train	421.15	CC(C)C1(C)CCCC1	0.19085
72.48	70.1558	Train	649.7	CC(C)C1=CC2=CC[C@H]3[C@](C)(C(=O)O)CCC[C@]3(C)[C@H]2CC1	2.32423
27.958	27.9605	Train	331.47	CC(C)C1CC1	0.002485
35.659	35.8724	Train	421.15	CC(C)C1CCCC1C	0.213444
35.038	35.2462	Train	414.15	CC(C)C1CCCC1C	0.208178
36.66	36.6629	Train	427.91	CC(C)C1CCCCC1	0.002865
31.736	31.9483	Train	375.15	CC(C)C=CC(C)C	0.212257
30.78	30.4864	Train	337.25	CC(C)C=O	0.293556
39.57	39.9311	Train	441.41	CC(C)CC(=O)CC(C)C	0.36113
43.22	43.9505	Train	448.25	CC(C)CC(=O)O	0.730546
39.402	39.3481	Train	453.15	CC(C)CC(C(C)C)C(C)(C)C	0.05395
38.058	38.3029	Train	443.15	CC(C)CC(C(C)C)C(C)C	0.244944
40.737	40.698	Train	467.15	CC(C)CC(C)(C(C)C)C(C)C	0.038956
31.02	31.4166	Train	372.39	CC(C)CC(C)(C)C	0.39659
37.038	38.0635	Train	443.65	CC(C)CC(C)(C)C(C)(C)C	1.02549
36.28	36.3017	Train	426.26	CC(C)CC(C)(C)C(C)C	0.021693
40.355	40.2898	Train	463.15	CC(C)CC(C)(C)C(C)C(C)C	0.06516
39.935	39.9256	Train	458.75	CC(C)CC(C)(C)CC(C)(C)C	0.00936
37.15	37.5203	Train	437.15	CC(C)CC(C)(C)CC(C)C	0.370332
42.892	43.485	Train	441.45	CC(C)CC(C)(C)CO	0.592993
39.067	39.5948	Train	406.15	CC(C)CC(C)(C)O	0.527826
49.349	51.5731	Train	513.48	CC(C)CC(C)(O)C(C)(C)C	2.22414
42.501	42.8657	Train	439	CC(C)CC(C)(O)C(C)C	0.364677
44.41	44.5182	Train	455.15	CC(C)CC(C)(O)CC(C)C	0.108227
29.8	30.0198	Train	353.64	CC(C)CC(C)C	0.21978
36.23	35.8569	Train	421.56	CC(C)CC(C)C(C)(C)C	0.373112
40.833	40.8824	Train	468.15	CC(C)CC(C)C(C)(C)C(C)C	0.049393
40.164	40.2012	Train	461.15	CC(C)CC(C)C(C)C(C)(C)C	0.03721
40.002	40.2862	Train	459.45	CC(C)CC(C)C(C)CC(C)C	0.28423
42.517	42.3335	Train	433.15	CC(C)CC(C)C(C)O	0.183504
45.514	45.4504	Train	466	CC(C)CC(C)CC(C)(C)O	0.063576
36.9	36.0955	Train	420.76	CC(C)CC(C)CC(C)C	0.804488
40.355	40.6138	Train	463.15	CC(C)CC(C)CC(C)C(C)C	0.25879
46.292	46.1385	Train	467.15	CC(C)CC(C)CC(C)O	0.15354
45.481	45.2373	Train	455	CC(C)CC(C)CCCO	0.243703
42.564	43.2405	Train	432.15	CC(C)CC(C)CO	0.676498
39.687	39.8578	Train	456.15	CC(C)CC(CC(C)C)C(C)C	0.170754
45.522	45.9432	Train	460.15	CC(C)CC(CO)C(C)C	0.42115
47.555	47.4484	Train	477.15	CC(C)CC(CO)CC(C)C	0.10663
41.91	42.1752	Train	433.15	CC(C)CC(O)C(C)(C)C	0.26521
42.414	43.0724	Train	432.15	CC(C)CC(O)C(C)C	0.658414
44.394	44.3464	Train	455	CC(C)CC(O)CC(C)(C)C	0.047645
32.502	32.7979	Train	365.75	CC(C)CC=O	0.295905
40.431	40.5075	Train	463.95	CC(C)CCC(C(C)C)C(C)C	0.076515
33.58	33.7338	Train	397.24	CC(C)CCC(C)(C)C	0.153795
40.641	40.5401	Train	466.15	CC(C)CCC(C)(C)C(C)(C)C	0.100934
38.131	38.4074	Train	448.15	CC(C)CCC(C)(C)C(C)C	0.276433
39.783	39.7178	Train	457.15	CC(C)CCC(C)(C)CC(C)C	0.065173
41.293	41.3381	Train	425.65	CC(C)CCC(C)(C)O	0.04508
45.208	45.4531	Train	463	CC(C)CCC(C)(O)C(C)C	0.245053
32.73	32.6449	Train	382.26	CC(C)CCC(C)C	0.085114
37.685	37.8832	Train	443.15	CC(C)CCC(C)C(C)(C)C	0.19817
37.32	36.813	Train	429.16	CC(C)CCC(C)C(C)C	0.507004
40.737	40.8112	Train	467.15	CC(C)CCC(C)C(C)C(C)C	0.07424
39.859	39.8475	Train	457.95	CC(C)CCC(C)CC(C)(C)C	0.011454
38.491	38.2841	Train	444.15	CC(C)CCC(C)CC(C)C	0.206874
40.546	40.4935	Train	465.15	CC(C)CCC(C)CCC(C)C	0.052466
48.889	48.3479	Train	485	CC(C)CCC(C)CCCO	0.541115
41.743	41.7658	Train	424.15	CC(C)CCC(C)O	0.02277
48.543	48.8258	Train	486.15	CC(C)CCC(CO)C(C)C	0.282832
45.208	45.2017	Train	463	CC(C)CCC(O)C(C)(C)C	0.006267
44.332	44.2218	Train	448.15	CC(C)CCC(O)C(C)C	0.110233
46.241	45.9211	Train	464	CC(C)CCC(O)CC(C)C	0.31995
35.445	35.28	Train	395.15	CC(C)CCC=O	0.165024
36.74	36.0935	Train	422.09	CC(C)CCCC(C)(C)C	0.6465
40.928	40.7998	Train	469.15	CC(C)CCCC(C)(C)C(C)C	0.128157
43.443	43.437	Train	444.15	CC(C)CCCC(C)(C)O	0.00599
35.38	35.1178	Train	408.36	CC(C)CCCC(C)C	0.262156
40.737	40.6154	Train	467.15	CC(C)CCCC(C)C(C)(C)C	0.12156
39.218	38.9932	Train	452.15	CC(C)CCCC(C)C(C)C	0.224813
40.451	40.5368	Train	464.15	CC(C)CCCC(C)CC(C)C	0.08581
48.905	48.0597	Train	485.15	CC(C)CCCC(C)CCO	0.845323
44.171	43.8802	Train	445.05	CC(C)CCCC(C)O	0.290804
46.568	46.546	Train	467.15	CC(C)CCCC(O)C(C)C	0.021987
38.021	38.1316	Train	443.15	CC(C)CCCCC(C)(C)C	0.11057
47.908	48.4284	Train	485	CC(C)CCCCC(C)(C)O	0.520413
38.24	37.482	Train	433.03	CC(C)CCCCC(C)C	0.757956
45.377	44.7583	Train	454	CC(C)CCCCC(C)O	0.61866
40.833	40.6048	Train	468.15	CC(C)CCCCCC(C)(C)C	0.22825
49.099	48.7312	Train	487	CC(C)CCCCCC(C)O	0.36783
41.693	41.8279	Train	477.15	CC(C)CCCCCCC(C)C	0.134904
71.2	73.4038	Train	723	CC(C)CCCCCCCOC(=O)c1ccccc1C(=O)OCCCCCCCC(C)C	2.20379
48.469	50.0998	Train	479.15	CC(C)CCCCCCO	1.63083
46.262	48.0956	Train	460.85	CC(C)CCCCCO	1.83363
71.11	73.6871	Train	694	CC(C)CCCCCOC(=O)c1ccccc1C(=O)OCCCCCC(C)C	2.57708
48.07	46.095	Train	445.15	CC(C)CCCCO	1.97498
40.407	43.405	Train	424.95	CC(C)CCCO	2.99798
43.84	42.1012	Train	404.35	CC(C)CCO	1.73878
43.15	43.8763	Train	467.15	CC(C)CCOC(=O)CC(C)C	0.72626
35.128	35.8225	Train	397.25	CC(C)CCOC=O	0.69445
41.599	42.2153	Train	472.05	CC(C)CCc1ccccc1	0.616263
43.47	40.8881	Train	380.81	CC(C)CO	2.58195
37.68	38.0851	Train	420.65	CC(C)COC(=O)C(C)C	0.40515
33.98	33.4044	Train	371.22	CC(C)COC=O	0.5756
47.499	49.1779	Train	510.15	CC(C)Cc1ccc(O)cc1	1.67894
52.148	52.5539	Train	585.41	CC(C)Cc1ccc2ccccc2c1	0.405932
47.485	49.1656	Train	510	CC(C)Cc1cccc(O)c1	1.68056
48.965	49.5811	Train	552.65	CC(C)Cc1cccc2ccccc12	0.616146
38.73	39.7128	Train	445.94	CC(C)Cc1ccccc1	0.98279
47.485	48.9689	Train	510	CC(C)Cc1ccccc1O	1.48385
39.87	38.0794	Train	355.41	CC(C)O	1.79059
31.85	32.7463	Train	378.66	CC(C)OC(C)(C)C	0.896258
29.58	29.6138	Train	341.45	CC(C)OC(C)C	0.033825
29.536	30.9679	Train	341.25	CC(C)OC=O	1.43188
42.92	42.365	Train	483.65	CC(C)c1ccc(C(C)C)cc1	0.555048
46.467	48.39	Train	502.35	CC(C)c1ccc(O)cc1	1.92298
41.62	41.7548	Train	476.33	CC(C)c1cccc(C(C)C)c1	0.134753
46.351	48.0075	Train	501.15	CC(C)c1cccc(O)c1	1.65649
47.831	48.545	Train	540.94	CC(C)c1cccc2ccccc12	0.714006
38.07	37.7798	Train	425.56	CC(C)c1ccccc1	0.29024
45.047	46.0156	Train	487.65	CC(C)c1ccccc1O	0.968587
48.158	47.0911	Train	544.32	CC(C1CCCCC1)C1CCCCC1	1.06692
36.644	37.5779	Train	439.15	CC(CC(C)(C)C)C(C)(C)C	0.933896
39.206	39.1628	Train	451.1	CC(CC(C)(C)C)CC(C)(C)C	0.043215
39.878	39.673	Train	458.15	CC(CCC(C)(C)C)C(C)(C)C	0.205026
46.609	47.0517	Train	475.15	CC(CCCO)C(C)(C)C	0.442655
43.151	43.2314	Train	444	CC(CCO)C(C)(C)C	0.08039
58.799	59.6699	Train	517.03	CC(CCO)C(C)(C)O	0.8709
45.689	45.926	Train	466.15	CC(CCO)CC(C)(C)C	0.237006
60.972	62.2627	Train	521.55	CC(CCO)CCO	1.29069
41.78	42.8201	Train	433.15	CC(CO)C(C)(C)C	1.04007
54.17	55.5655	Train	480	CC(CO)C(C)(C)O	1.39551
57.402	58.0713	Train	496.94	CC(CO)C(C)CO	0.66929
57.402	58.0713	Train	496.94	CC(CO)C(C)CO	0.669266
43.166	43.7494	Train	444.15	CC(CO)CC(C)(C)C	0.58341
59.008	59.5639	Train	508.21	CC(CO)CC(C)CO	0.555866
59.008	59.5639	Train	508.21	CC(CO)CC(C)CO	0.555854
57.402	59.5372	Train	496.94	CC(CO)CCCO	2.1352
53.106	55.0456	Train	463.15	CC(CO)CCO	1.93962
49.368	50.0999	Train	556.81	CC(Cc1ccccc1)c1ccccc1	0.73187
50.663	51.2712	Train	570.15	CC(Cc1ccccc1)c1ccccc1	0.60823
58.16	56.1013	Train	447	CC(O)C(=O)O	2.05866
36.004	38.398	Train	393.15	CC(O)C(C)(C)C	2.39398
43.037	43.5448	Train	453.15	CC(O)C(C)(C)C(C)(C)C	0.507823
44.298	44.6375	Train	463	CC(O)C(C)(C)CC(C)(C)C	0.33948
53.649	54.8312	Train	475.55	CC(O)C(C)(C)CO	1.18219
50.067	51.6146	Train	447.15	CC(O)C(C)(C)O	1.54763
41.439	41.5524	Train	431.15	CC(O)C(C)C(C)(C)C	0.11339
59.513	60.3644	Train	519.72	CC(O)C(C)C(C)O	0.851426
59.008	59.4293	Train	508.21	CC(O)C(C)CCCO	0.42131
53.046	54.4782	Train	462.65	CC(O)C(C)CO	1.43221
51.524	53.4654	Train	452	CC(O)C(C)O	1.94138
51.742	53.6985	Train	453.85	CC(O)C(C)O	1.9565
39.568	39.7901	Train	411.15	CC(O)CC(C)(C)C	0.22211
42.706	42.3388	Train	435	CC(O)CC(C)C(C)C	0.36722
45.514	45.2314	Train	466	CC(O)CC(C)CC(C)(C)C	0.282593
54.413	55.2902	Train	474.15	CC(O)CC(C)O	0.87717
54.413	55.2902	Train	474.15	CC(O)CC(C)O	0.877176
61.135	60.6695	Train	530.99	CC(O)CC(O)C(C)C	0.465498
46.086	45.3938	Train	465.15	CC(O)CCC(C)C(C)C	0.692155
56.831	58.8447	Train	485.43	CC(O)CCCCCO	2.01365
57.737	59.2724	Train	497	CC(O)CCCO	1.53541
56.58	56.839	Train	480.15	CC(O)CCO	0.258985
56.28	57.6818	Train	487.15	CC(O)CCO	1.40182
50.4	49.2101	Train	545.78	CC(c1ccccc1)c1ccccc1	1.18995
30.459	30.5886	Train	361.15	CC1(C)C=CCC1	0.129627
33.142	33.4357	Train	392.15	CC1(C)C=CCCC1	0.293745
24.557	24.3251	Train	293.78	CC1(C)CC1	0.231929
30.459	30.5261	Train	361.15	CC1(C)CC=CC1	0.067052
32.986	33.2789	Train	390.39	CC1(C)CC=CCC1	0.292908
32.728	32.9951	Train	391.11	CC1(C)CCC(C)(C)C1	0.26712
27.604	27.5798	Train	329.15	CC1(C)CCC1	0.024183
30.64	30.4929	Train	361	CC1(C)CCCC1	0.147078
34.051	34.3144	Train	406.15	CC1(C)CCCC1(C)C	0.26336
31.357	31.5499	Train	365.35	CC1(C)CCCO1	0.192898
31.97	32.0849	Train	372.15	CC1(C)CCOC1	0.114858
45.95	45.6562	Train	430.15	CC1(O)CCCCC1	0.29377
41.64	43.5411	Train	480.57	CC12CCC(CC1=O)C2(C)C	1.90113
41.905	42.1871	Train	488.15	CC12CCCCC1CCCC2	0.282057
41.006	41.2947	Train	478.15	CC12CCCCC1CCCC2	0.28868
45.73	44.7641	Train	509	CC1=C(C)C(C)c2ccccc21	0.9659
31.93	32.3944	Train	378.95	CC1=C(C)CCC1	0.464375
34.721	35.3001	Train	411.13	CC1=C(C)CCCC1	0.579095
42.37	45.0747	Train	488.35	CC1=CC(=O)CC(C)(C)C1	2.70467
30.04	29.4579	Train	345.93	CC1=CC=CC1	0.582128
39.91	38.8606	Train	448.15	CC1=CCC(C(C)C)C=C1	1.04944
33.837	34.1638	Train	401.15	CC1=CCC(C)CC1	0.326795
33.837	34.1202	Train	401.15	CC1=CCCC(C)C1	0.283205
29.05	29.7269	Train	348.95	CC1=CCCC1	0.676936
31.595	31.7274	Train	375.15	CC1=CCCC1C	0.13238
32.466	32.864	Train	383.45	CC1=CCCCC1	0.398033
34.112	34.374	Train	404.25	CC1=CCCCC1C	0.262035
40.65	40.6597	Train	458	CC1=Cc2ccccc2C1	0.009748
28.313	28.2686	Train	339.15	CC1C(C)C1C	0.044363
30.658	30.7235	Train	364.55	CC1C=CC(C)C1	0.065547
30.658	30.7235	Train	364.55	CC1C=CC(C)C1	0.065547
33.364	33.5656	Train	395.8	CC1C=CC(C)CC1	0.201636
33.364	33.5656	Train	395.8	CC1C=CC(C)CC1	0.201647
33.364	33.5771	Train	395.8	CC1C=CCC(C)C1	0.213137
33.364	33.5771	Train	395.8	CC1C=CCC(C)C1	0.21314
28.87	29.0343	Train	343.16	CC1C=CCC1	0.164254
30.658	30.7151	Train	364.55	CC1C=CCC1C	0.057067
31.772	32.0101	Train	375.62	CC1C=CCCC1	0.238117
33.364	33.5671	Train	395.8	CC1C=CCCC1C	0.203085
33.364	33.5671	Train	395.8	CC1C=CCCC1C	0.2031
42.06	41.7002	Train	471.65	CC1C=Cc2ccccc21	0.35981
33.959	34.2364	Train	406.15	CC1CC(C)(C)CC1C	0.277366
32.959	33.2165	Train	394.75	CC1CC(C)(C)CC1C	0.257507
31.963	32.1778	Train	382.44	CC1CC(C)C(C)C1	0.214807
32.64	32.8676	Train	390.15	CC1CC(C)C(C)C1	0.227565
32.616	32.8434	Train	389.88	CC1CC(C)C(C)C1	0.227426
33.697	34.0802	Train	404.15	CC1CC(C)C(C)C1C	0.38321
34.31	34.7065	Train	411.15	CC1CC(C)C(C)C1C	0.396467
34.924	35.3327	Train	418.15	CC1CC(C)C(C)C1C	0.4087
33.697	34.0802	Train	404.15	CC1CC(C)C(C)C1C	0.38322
27.904	27.8707	Train	333.65	CC1CC(C)C1	0.03335
27.64	27.6023	Train	330.65	CC1CC(C)C1	0.037715
35.02	35.0323	Train	413.7	CC1CC(C)CC(C)C1	0.01234
34.722	35.0922	Train	414.37	CC1CC(C)CC(C)C1	0.370247
34.475	34.8409	Train	411.56	CC1CC(C)CC(C)C1	0.36586
22.893	22.4673	Train	273.88	CC1CC1	0.425663
27.169	27.004	Train	325.59	CC1CC1(C)C	0.164993
25.173	24.8948	Train	301.36	CC1CC1C	0.278177
29.31	29.5259	Train	348.31	CC1CC=CC1	0.21587
31.795	32.0856	Train	375.89	CC1CC=CCC1	0.290587
33.82	34.0449	Train	400.96	CC1CC=CCC1C	0.22491
33.364	33.5833	Train	395.8	CC1CC=CCC1C	0.219267
35.126	35.3381	Train	415.15	CC1CCC(C(C)C)C1	0.21214
35.126	35.3381	Train	415.15	CC1CCC(C(C)C)C1	0.212142
34.398	34.73	Train	411.15	CC1CCC(C)(C)C1C	0.332015
33.696	34.0143	Train	403.15	CC1CCC(C)(C)C1C	0.318297
34.722	35.0888	Train	414.37	CC1CCC(C)C(C)C1	0.366768
30.75	30.656	Train	363.92	CC1CCC(C)C1	0.093988
31.37	30.7419	Train	364.88	CC1CCC(C)C1	0.628095
34.398	34.74	Train	411.15	CC1CCC(C)C1(C)C	0.34203
34.398	34.74	Train	411.15	CC1CCC(C)C1(C)C	0.342025
33.167	33.4147	Train	396.15	CC1CCC(C)C1C	0.24774
32.043	32.2696	Train	383.35	CC1CCC(C)C1C	0.22656
32.684	32.9227	Train	390.65	CC1CCC(C)C1C	0.23866
32.48	33.2974	Train	392.51	CC1CCC(C)CC1	0.817432
33.14	33.7412	Train	397.47	CC1CCC(C)CC1	0.601165
31.276	31.4192	Train	365.65	CC1CCC(C)O1	0.143224
48.6	48.4	Train	444.15	CC1CCC(O)CC1	0.200006
48.43	48.4	Train	444.15	CC1CCC(O)CC1	0.030006
25.428	25.3632	Train	303.45	CC1CCC1	0.06484
27.86	27.8189	Train	333.15	CC1CCC1C	0.041097
41.275	41.3094	Train	481.15	CC1CCC2CCCCC2C1	0.034402
34.409	34.7519	Train	409.78	CC1CCCC(C)(C)C1	0.342896
33.25	33.7241	Train	397.61	CC1CCCC(C)C1	0.47409
32.72	33.3331	Train	393.24	CC1CCCC(C)C1	0.613122
35.758	36.1499	Train	426.15	CC1CCCC(C)C1C	0.39194
35.582	35.971	Train	424.15	CC1CCCC(C)C1C	0.388993
47.41	47.3197	Train	441.15	CC1CCCC(O)C1	0.090298
29.34	29.1782	Train	344.96	CC1CCCC1	0.161772
31.71	31.4242	Train	372.68	CC1CCCC1C	0.285754
43.226	42.4946	Train	493.15	CC1CCCC2(C)CCCCC12	0.73144
42.555	41.7404	Train	486.15	CC1CCCC2(C)CCCCC12	0.814567
43.707	43.7547	Train	508.15	CC1CCCC2CCCCC12	0.047707
31.82	31.8463	Train	374.08	CC1CCCCC1	0.026329
32.87	33.5915	Train	396.58	CC1CCCCC1C	0.7215
33.54	34.1605	Train	402.94	CC1CCCCC1C	0.620492
46.17	46.5874	Train	438.15	CC1CCCCC1O	0.417444
46.6	46.7652	Train	439.65	CC1CCCCC1O	0.165213
30.43	30.603	Train	353.37	CC1CCCO1	0.173025
35.606	35.839	Train	411.15	CC1CCOC1	0.233035
31.666	31.7889	Train	370	CC1CCOC1C	0.122855
43.57	43.6815	Train	493.15	CC1CCc2ccccc2C1	0.11152
27.73	27.0834	Train	307.05	CC1CO1	0.646573
31.734	31.9026	Train	370.75	CC1COC(C)C1	0.168555
37.72	38.0716	Train	397.25	CC1OC(C)OC(C)O1	0.351568
26.48	26.16	Train	311.71	CC=C(C)C	0.31996
42.622	45.7619	Train	471.65	CC=C(C)C(=O)O	3.13987
41.347	44.1543	Train	458.15	CC=C(C)C(=O)O	2.80734
32.063	32.4693	Train	385.15	CC=C(C)C(C)(C)C	0.406337
32.063	32.4693	Train	385.15	CC=C(C)C(C)(C)C	0.406334
30.66	30.9091	Train	364.65	CC=C(C)C(C)C	0.24906
30.462	30.7078	Train	362.4	CC=C(C)C(C)C	0.24575
33.02	33.1865	Train	389.15	CC=C(C)C(C)CC	0.166527
33.02	33.1865	Train	389.15	CC=C(C)C(C)CC	0.166527
28.92	28.8794	Train	340.85	CC=C(C)CC	0.040598
31.261	31.495	Train	368.33	CC=C(C)CCC	0.234012
31.446	31.6811	Train	370.41	CC=C(C)CCC	0.235078
33.856	34.0606	Train	395.15	CC=C(C)CCCC	0.204596
33.856	34.0606	Train	395.15	CC=C(C)CCCC	0.204604
38.882	39.7568	Train	447.15	CC=C(C)c1ccccc1	0.874836
40.77	41.603	Train	467.85	CC=C(C)c1ccccc1	0.833027
33.02	33.2162	Train	389.15	CC=C(CC)C(C)C	0.19618
32.869	33.0641	Train	387.45	CC=C(CC)C(C)C	0.195064
31.335	31.5141	Train	369.16	CC=C(CC)CC	0.17906
33.766	33.9038	Train	394.15	CC=C(CC)CCC	0.13782
33.766	33.9038	Train	394.15	CC=C(CC)CCC	0.13784
27.76	27.2391	Train	321.4	CC=C=CC	0.520897
28.83	29.1577	Train	341.15	CC=C=CCC	0.327724
22.91	22.6937	Train	274.03	CC=CC	0.21632
48.85	45.0894	Train	445.05	CC=CC(=O)O	3.76061
48.88	47.1964	Train	458.15	CC=CC(=O)O	1.68359
29.04	29.4155	Train	349.89	CC=CC(C)(C)C	0.375543
31.778	32.1455	Train	379.15	CC=CC(C)(C)CC	0.367485
27.51	27.8659	Train	329.53	CC=CC(C)C	0.355904
27.85	28.0645	Train	331.75	CC=CC(C)C	0.214526
32.446	32.6538	Train	383.15	CC=CC(C)C(C)C	0.20781
32.446	32.6538	Train	383.15	CC=CC(C)C(C)C	0.20781
30.434	30.6307	Train	359.46	CC=CC(C)CC	0.19671
30.545	30.7425	Train	360.71	CC=CC(C)CC	0.197535
33.096	33.2079	Train	387.15	CC=CC(C)CCC	0.11185
33.096	33.2078	Train	387.15	CC=CC(C)CCC	0.111848
33.007	33.0991	Train	386.15	CC=CC(CC)CC	0.092083
33.007	33.0991	Train	386.15	CC=CC(CC)CC	0.09209
29.804	30.2181	Train	353.15	CC=CC=CC	0.414126
30.51	30.5313	Train	356.65	CC=CC=CC	0.021282
30.68	30.3881	Train	355.05	CC=CC=CC	0.29185
26.54	26.3137	Train	310.08	CC=CCC	0.226283
26.25	26.261	Train	309.49	CC=CCC	0.01095
42.439	45.7772	Train	466.15	CC=CCC(=O)O	3.33821
35.42	36.5363	Train	392.15	CC=CCC(=O)O	1.11625
31.857	32.185	Train	380.05	CC=CCC(C)(C)C	0.327986
31.61	31.9345	Train	377.25	CC=CCC(C)(C)C	0.324488
30.594	30.8056	Train	361.26	CC=CCC(C)C	0.211632
33.455	33.5505	Train	391.15	CC=CCC(C)CC	0.095495
33.455	33.5505	Train	391.15	CC=CCC(C)CC	0.09548
28.83	29.2741	Train	342.03	CC=CCCC	0.444137
29.1	29.1838	Train	341.02	CC=CCCC	0.083783
33.365	33.5077	Train	390.15	CC=CCCC(C)C	0.142748
33.365	33.5077	Train	390.15	CC=CCCC(C)C	0.14274
31.73	32.099	Train	371.1	CC=CCCCC	0.369037
31.16	32.1402	Train	371.56	CC=CCCCC	0.9802
34.45	34.788	Train	398.79	CC=CCCCCC	0.337968
47.368	47.975	Train	536.15	CC=CCCCCCCCCCCC	0.607002
41.603	42.0565	Train	474.15	CC=Cc1ccc(C)cc1	0.453488
41.144	41.6113	Train	469.15	CC=Cc1ccc(C)cc1	0.46733
47.73	46.4495	Train	508.45	CC=Cc1ccc(OC)cc1	1.28045
40.815	41.309	Train	465.57	CC=Cc1cccc(C)c1	0.494006
38.74	39.5749	Train	443.16	CC=Cc1ccccc1	0.834898
38.74	39.5749	Train	443.16	CC=Cc1ccccc1	0.834913
40.815	41.391	Train	465.57	CC=Cc1ccccc1C	0.576037
24.63	26.8365	Train	293.55	CC=O	2.20648
18.8	18.0822	Train	231.11	CCC	0.717799
31.004	31.5576	Train	368.35	CCC#CC(C)C	0.553634
30.37	30.573	Train	354.35	CCC#CCC	0.20297
34.862	35.6242	Train	406.29	CCC#CCCCC	0.7622
37.245	37.8341	Train	430.25	CCC#CCCCCC	0.58909
39.509	39.985	Train	452.45	CCC#CCCCCCC	0.475962
43.169	43.7189	Train	492.55	CCC#CCCCCCCCC	0.549887
44.956	45.5424	Train	511.15	CCC#CCCCCCCCCC	0.586446
46.595	47.2852	Train	528.15	CCC#CCCCCCCCCCC	0.690152
48.142	48.9103	Train	544.15	CCC#CCCCCCCCCCCC	0.76834
50.955	51.8063	Train	573.15	CCC#CCCCCCCCCCCCCC	0.851343
52.317	53.1808	Train	587.15	CCC#CCCCCCCCCCCCCCC	0.8638
53.585	54.4516	Train	600.15	CCC#CCCCCCCCCCCCCCCC	0.86664
53.878	54.8443	Train	603.15	CCC#CCCCCCCCCCCCCCCCC	0.96629
34.903	34.737	Train	398.15	CCC(=O)C(C)(C)C	0.166023
33.84	34.2844	Train	386.55	CCC(=O)C(C)C	0.44442
36.622	36.3773	Train	409.15	CCC(=O)C(C)CC	0.244715
33.57	33.3826	Train	375.14	CCC(=O)CC	0.187416
36.622	36.361	Train	409.15	CCC(=O)CC(C)C	0.261046
41.093	38.7709	Train	414.55	CCC(=O)OC(C)(C)C	2.32208
42.772	41.4699	Train	437.43	CCC(=O)OC(C)(C)CC	1.30214
33.995	34.901	Train	383.15	CCC(=O)OC(C)C	0.90599
42.797	41.479	Train	439.78	CCC(=O)OC(C)C(C)C	1.31803
39.055	39.2535	Train	417.34	CCC(=O)OC(C)CC	0.19851
42.44	41.6704	Train	440.22	CCC(=O)OC(CC)CC	0.769582
41.622	40.6898	Train	437.43	CCC(=O)OCC(C)(C)C	0.932204
35.597	37.3586	Train	409.75	CCC(=O)OCC(C)C	1.76162
40.577	41.2454	Train	440.22	CCC(=O)OCC(C)CC	0.668365
37.871	39.2091	Train	453.15	CCC(C(C)(C)C)C(C)(C)C	1.33811
41.31	41.707	Train	473.15	CCC(C(C)(C)C)C(C)(C)CC	0.39701
40.355	40.4251	Train	463.15	CCC(C(C)C(C)C)C(C)(C)C	0.07007
41.884	42.26	Train	479.15	CCC(C(C)C)(C(C)C)C(C)C	0.37604
36.15	36.496	Train	428.46	CCC(C(C)C)C(C)(C)C	0.34605
41.024	41.0751	Train	470.15	CCC(C(C)C)C(C)(C)C(C)C	0.051115
38.399	39.2443	Train	451.15	CCC(C(C)C)C(C)(C)CC	0.845335
41.31	41.9634	Train	473.15	CCC(C(C)C)C(C)(CC)CC	0.653448
34.73	35.0486	Train	409.87	CCC(C(C)C)C(C)C	0.3186
38.688	39.1289	Train	450.15	CCC(C(C)C)C(C)C(C)C	0.44092
40.451	40.7381	Train	464.15	CCC(C(C)C)C(C)CC(C)C	0.287136
42.926	43.3612	Train	437.15	CCC(C(C)C)C(C)O	0.435248
40.355	40.7872	Train	463.15	CCC(C(C)C)C(CC)C(C)C	0.432216
44.724	45.1327	Train	461	CCC(C(C)O)C(C)(C)C	0.408664
55.141	54.8735	Train	480.65	CCC(C(C)O)C(C)O	0.267522
42.651	43.1605	Train	487.15	CCC(C)(C(C)(C)C)C(C)(C)C	0.509538
37.03	37.8657	Train	442.6	CCC(C)(C(C)C)C(C)C	0.835734
41.406	41.3894	Train	474.15	CCC(C)(C(C)C)C(C)C(C)C	0.016554
26.42	26.8516	Train	322.88	CCC(C)(C)C	0.431587
42.843	43.4868	Train	489.15	CCC(C)(C)C(C)(C)C(C)(C)C	0.643824
38.486	39.8885	Train	460.15	CCC(C)(C)C(C)(C)C(C)C	1.40248
35.02	38.2694	Train	443.16	CCC(C)(C)C(C)(C)CC	3.2494
40.928	41.1479	Train	469.15	CCC(C)(C)C(C)(C)CC(C)C	0.219907
41.188	41.8851	Train	433.15	CCC(C)(C)C(C)(C)O	0.697117
42.076	42.5529	Train	481.15	CCC(C)(C)C(C)(CC)C(C)C	0.476948
39.088	40.5662	Train	463.15	CCC(C)(C)C(C)(CC)CC	1.47823
45.412	46.2101	Train	474.15	CCC(C)(C)C(C)(O)C(C)C	0.79811
35.417	35.113	Train	403.75	CCC(C)(C)C(C)=O	0.303955
32.4	32.7894	Train	387.92	CCC(C)(C)C(C)C	0.389425
38.398	39.7965	Train	459.15	CCC(C)(C)C(C)C(C)(C)C	1.39852
44.313	44.6331	Train	463.15	CCC(C)(C)C(C)C(C)(C)O	0.32007
41.024	41.0051	Train	470.15	CCC(C)(C)C(C)C(C)C(C)C	0.018858
39.973	39.8712	Train	459.15	CCC(C)(C)C(C)CC(C)(C)C	0.101757
45.485	45.4772	Train	464.15	CCC(C)(C)C(C)CCO	0.00776
40.472	41.2265	Train	420.15	CCC(C)(C)C(C)O	0.75451
44.313	44.8659	Train	463.15	CCC(C)(C)C(O)C(C)(C)C	0.55292
43.021	43.3619	Train	444.15	CCC(C)(C)C(O)C(C)C	0.34092
44.394	44.5159	Train	455	CCC(C)(C)C(O)CC(C)C	0.121854
29.74	30.2551	Train	359.21	CCC(C)(C)CC	0.51506
35.06	36.4678	Train	426.96	CCC(C)(C)CC(C)(C)C	1.40777
41.31	41.6625	Train	473.15	CCC(C)(C)CC(C)(C)C(C)C	0.352453
38.203	39.4647	Train	453.15	CCC(C)(C)CC(C)(C)CC	1.26174
44.744	45.6521	Train	466	CCC(C)(C)CC(C)(C)O	0.908073
41.502	42.3922	Train	475.15	CCC(C)(C)CC(C)(CC)CC	0.89019
45.306	45.7128	Train	468.75	CCC(C)(C)CC(C)(O)CC	0.406765
34.31	34.3337	Train	403.81	CCC(C)(C)CC(C)C	0.02374
40.069	39.9673	Train	460.15	CCC(C)(C)CC(C)C(C)(C)C	0.101703
37.863	38.4826	Train	445.15	CCC(C)(C)CC(C)C(C)C	0.619616
42.239	42.3042	Train	435	CCC(C)(C)CC(C)O	0.065222
36.965	37.7205	Train	439.15	CCC(C)(C)CCC(C)(C)C	0.755516
36.78	36.3984	Train	425.96	CCC(C)(C)CCC(C)C	0.38164
38.561	38.7871	Train	449.15	CCC(C)(C)CCCC(C)C	0.22608
41.024	41.1399	Train	470.15	CCC(C)(C)CCCCC(C)C	0.115904
44.705	45.5613	Train	455	CCC(C)(C)CCCO	0.856333
42.704	43.5859	Train	438.15	CCC(C)(C)CCO	0.881888
37.935	41.2823	Train	409.95	CCC(C)(C)CO	3.34734
30.492	31.2656	Train	359.45	CCC(C)(C)OC	0.773596
34.994	35.9724	Train	397.15	CCC(C)(C)OC(C)=O	0.97839
33.488	34.5631	Train	385.65	CCC(C)(C)OC=O	1.07507
40.225	41.0609	Train	465.53	CCC(C)(C)c1ccccc1	0.835917
41.024	41.2542	Train	470.15	CCC(C)(CC(C)(C)C)C(C)C	0.23016
40.737	40.7678	Train	467.15	CCC(C)(CC(C)C)C(C)(C)C	0.03083
38.22	38.8222	Train	449.15	CCC(C)(CC(C)C)C(C)C	0.602224
39.878	40.0081	Train	458.15	CCC(C)(CC(C)C)CC(C)C	0.130144
36.48	38.1474	Train	442.66	CCC(C)(CC)C(C)(C)C	1.66738
42.076	42.5028	Train	481.15	CCC(C)(CC)C(C)(C)C(C)C	0.42682
44.243	44.9307	Train	461	CCC(C)(CC)C(C)(C)O	0.687695
42.268	43.2737	Train	483.15	CCC(C)(CC)C(C)(CC)CC	1.00569
42.076	42.5752	Train	481.15	CCC(C)(CC)C(C)C(C)(C)C	0.499157
38.577	39.3444	Train	453.15	CCC(C)(CC)C(C)C(C)C	0.767383
41.024	41.5251	Train	470.15	CCC(C)(CC)C(C)CC(C)C	0.50114
42.036	42.3608	Train	433	CCC(C)(CC)C(C)O	0.324806
32.81	33.2896	Train	391.42	CCC(C)(CC)CC	0.479604
38.026	39.2189	Train	451.15	CCC(C)(CC)CC(C)(C)C	1.19292
37.07	37.3621	Train	434.26	CCC(C)(CC)CC(C)C	0.29211
40.737	40.9243	Train	467.15	CCC(C)(CC)CC(C)C(C)C	0.1873
40.26	40.2596	Train	462.15	CCC(C)(CC)CCC(C)(C)C	0.00044
38.741	39.181	Train	451.15	CCC(C)(CC)CCC(C)C	0.44005
41.119	41.3787	Train	471.15	CCC(C)(CC)CCCC(C)C	0.259662
43.988	44.2779	Train	448	CCC(C)(CC)CCO	0.289935
40.928	41.0179	Train	469.15	CCC(C)(CCC(C)C)C(C)C	0.08989
43.353	44.2799	Train	446	CCC(C)(CO)C(C)C	0.926915
40.395	40.8222	Train	425.15	CCC(C)(O)C(C)(C)C	0.427227
45.512	46.0242	Train	475.15	CCC(C)(O)C(C)(C)C(C)C	0.5122
58.56	59.6462	Train	525.85	CCC(C)(O)C(C)(C)O	1.08618
39.769	40.649	Train	413.15	CCC(C)(O)C(C)C	0.87998
58.799	59.4787	Train	517.03	CCC(C)(O)C(C)CO	0.67965
57.187	57.9145	Train	505.76	CCC(C)(O)C(C)O	0.727455
37.065	39.0839	Train	395.56	CCC(C)(O)CC	2.01888
42.042	42.3486	Train	439	CCC(C)(O)CC(C)(C)C	0.306595
41.242	41.5027	Train	425.15	CCC(C)(O)CC(C)C	0.260663
58.799	58.8184	Train	517.03	CCC(C)(O)CC(C)O	0.019447
44.04	44.084	Train	450	CCC(C)(O)CCC(C)C	0.043954
46.278	46.4346	Train	469.15	CCC(C)(O)CCCC(C)C	0.156563
55.088	55.0476	Train	482.98	CCC(C)(O)CCO	0.0404
31.219	31.5434	Train	370.55	CCC(C)=C(C)C	0.324367
33.596	33.8275	Train	395.15	CCC(C)=C(C)CC	0.231503
33.596	33.8275	Train	395.15	CCC(C)=C(C)CC	0.2315
32.273	32.4569	Train	380.75	CCC(C)=CC(C)C	0.183867
31.22	31.3186	Train	352.79	CCC(C)=O	0.09864
24.79	25.2911	Train	300.99	CCC(C)C	0.50106
46.58	44.3643	Train	450.15	CCC(C)C(=O)O	2.21568
40.26	40.3354	Train	462.15	CCC(C)C(C(C)C)C(C)(C)C	0.075438
38.508	38.9588	Train	448.15	CCC(C)C(C(C)C)C(C)C	0.450755
41.693	41.7731	Train	477.15	CCC(C)C(C)(C(C)C)C(C)C	0.080052
32.16	32.3365	Train	383	CCC(C)C(C)(C)C	0.176536
38.222	39.5808	Train	457.15	CCC(C)C(C)(C)C(C)(C)C	1.35883
41.884	42.3342	Train	479.15	CCC(C)C(C)(C)C(C)(C)CC	0.450152
36.99	37.3089	Train	437.75	CCC(C)C(C)(C)C(C)C	0.318937
41.31	41.2973	Train	473.15	CCC(C)C(C)(C)C(C)C(C)C	0.012682
39.024	39.8537	Train	458.15	CCC(C)C(C)(C)C(C)CC	0.829725
41.502	41.9823	Train	475.15	CCC(C)C(C)(C)C(CC)CC	0.480273
35.15	35.1841	Train	413.62	CCC(C)C(C)(C)CC	0.034074
40.928	41.1694	Train	469.15	CCC(C)C(C)(C)CC(C)(C)C	0.241395
38.042	38.6323	Train	447.15	CCC(C)C(C)(C)CC(C)C	0.590275
40.737	40.8222	Train	467.15	CCC(C)C(C)(C)CCC(C)C	0.08515
43.521	44.4049	Train	447.65	CCC(C)C(C)(C)CO	0.883945
39.669	40.3612	Train	412.15	CCC(C)C(C)(C)O	0.692183
41.693	42.0486	Train	477.15	CCC(C)C(C)(CC)C(C)(C)C	0.355634
39.203	40.1127	Train	460.15	CCC(C)C(C)(CC)C(C)C	0.909694
41.789	42.4006	Train	478.15	CCC(C)C(C)(CC)C(C)CC	0.61157
40.833	41.1223	Train	468.15	CCC(C)C(C)(CC)CC(C)C	0.289337
44.513	45.0515	Train	465.15	CCC(C)C(C)(O)C(C)(C)C	0.53852
42.501	42.7306	Train	439	CCC(C)C(C)(O)C(C)C	0.229568
41.242	41.5661	Train	425.15	CCC(C)C(C)(O)CC	0.324135
44.394	44.4659	Train	455	CCC(C)C(C)(O)CC(C)C	0.07188
33.939	34.4348	Train	390.55	CCC(C)C(C)=O	0.495826
30.49	30.8178	Train	362.93	CCC(C)C(C)C	0.327802
36.4	36.7664	Train	431.96	CCC(C)C(C)C(C)(C)C	0.366373
41.31	41.2874	Train	473.15	CCC(C)C(C)C(C)(C)C(C)C	0.022578
38.667	39.5158	Train	454.15	CCC(C)C(C)C(C)(C)CC	0.848778
45.23	45.723	Train	466	CCC(C)C(C)C(C)(C)O	0.49303
41.502	42.0926	Train	475.15	CCC(C)C(C)C(C)(CC)CC	0.59058
35.69	35.2143	Train	412.2	CCC(C)C(C)C(C)C	0.475698
38.869	39.2772	Train	452.15	CCC(C)C(C)C(C)C(C)C	0.408172
41.215	41.7966	Train	472.15	CCC(C)C(C)C(C)C(C)CC	0.581562
37.45	37.517	Train	435.66	CCC(C)C(C)C(C)CC	0.06697
40.737	41.0545	Train	467.15	CCC(C)C(C)C(C)CC(C)C	0.317535
43.643	43.8757	Train	444.15	CCC(C)C(C)C(C)O	0.2327
40.928	41.5407	Train	469.15	CCC(C)C(C)C(CC)C(C)C	0.612703
39.491	39.911	Train	455.15	CCC(C)C(C)C(CC)CC	0.42001
33.31	33.3917	Train	390.88	CCC(C)C(C)CC	0.08172
37.596	38.1834	Train	442.15	CCC(C)C(C)CC(C)(C)C	0.587388
40.641	41.061	Train	466.15	CCC(C)C(C)CC(C)(C)CC	0.419978
37.11	36.8619	Train	429.66	CCC(C)C(C)CC(C)C	0.248084
40.833	41.039	Train	468.15	CCC(C)C(C)CC(C)C(C)C	0.206047
39.127	39.072	Train	451.15	CCC(C)C(C)CCC(C)C	0.05499
41.215	41.4323	Train	472.15	CCC(C)C(C)CCCC(C)C	0.217274
43.077	43.9208	Train	437.15	CCC(C)C(C)CO	0.843788
38.352	41.0128	Train	407.36	CCC(C)C(C)O	2.66078
40.26	40.5596	Train	462.15	CCC(C)C(CC(C)C)C(C)C	0.29955
41.31	41.8955	Train	473.15	CCC(C)C(CC)(CC)C(C)C	0.585466
39.822	40.7751	Train	463.15	CCC(C)C(CC)(CC)CC	0.95307
38.131	38.9179	Train	448.15	CCC(C)C(CC)C(C)(C)C	0.786915
37.15	37.3298	Train	433.26	CCC(C)C(CC)C(C)C	0.17981
40.928	41.5249	Train	469.15	CCC(C)C(CC)C(C)C(C)C	0.59694
39.4	39.825	Train	454.15	CCC(C)C(CC)C(C)CC	0.424997
41.119	42.191	Train	471.15	CCC(C)C(CC)C(CC)CC	1.07195
39.973	40.1106	Train	459.15	CCC(C)C(CC)CC(C)(C)C	0.13757
38.854	39.116	Train	448.15	CCC(C)C(CC)CC(C)C	0.26202
40.833	41.1727	Train	468.15	CCC(C)C(CC)CCC(C)C	0.339676
44.244	44.467	Train	452	CCC(C)C(O)(CC)CC	0.222953
42.819	43.1065	Train	442.15	CCC(C)C(O)C(C)(C)C	0.28753
42.517	42.9588	Train	433.15	CCC(C)C(O)C(C)C	0.441824
45.569	46.0696	Train	460.15	CCC(C)C(O)C(C)CC	0.500588
41.538	42.3133	Train	422.15	CCC(C)C(O)CC	0.7753
36.631	36.6652	Train	427.5	CCC(C)C1CCCC1	0.034245
32.54	32.7381	Train	383.75	CCC(C)C=C(C)C	0.198106
28.26	28.5734	Train	336.42	CCC(C)CC	0.313374
40.355	40.6602	Train	463.15	CCC(C)CC(C(C)C)C(C)C	0.305244
34.02	33.9586	Train	399.69	CCC(C)CC(C)(C)C	0.06135
40.737	40.8407	Train	467.15	CCC(C)CC(C)(C)C(C)(C)C	0.1037
40.833	41.1114	Train	468.15	CCC(C)CC(C)(C)C(C)CC	0.278435
36.65	36.8118	Train	428.85	CCC(C)CC(C)(C)CC	0.161817
39.878	40.0456	Train	458.15	CCC(C)CC(C)(C)CC(C)C	0.167593
41.11	41.2977	Train	423.85	CCC(C)CC(C)(C)O	0.18766
44.04	44.17	Train	450	CCC(C)CC(C)(O)CC	0.130036
36.903	36.6204	Train	412.15	CCC(C)CC(C)=O	0.28265
32.48	32.6859	Train	382.58	CCC(C)CC(C)C	0.205944
37.15	37.242	Train	433.86	CCC(C)CC(C)C(C)C	0.092016
40.833	41.0345	Train	468.15	CCC(C)CC(C)C(C)C(C)C	0.201534
39.218	39.5292	Train	452.15	CCC(C)CC(C)C(C)CC	0.311247
41.024	41.8569	Train	470.15	CCC(C)CC(C)C(CC)CC	0.832895
35.65	35.1219	Train	409.16	CCC(C)CC(C)CC	0.528113
39.878	40.0209	Train	458.15	CCC(C)CC(C)CC(C)(C)C	0.142897
38.764	38.9603	Train	447.15	CCC(C)CC(C)CC(C)C	0.196316
40.737	41.0627	Train	467.15	CCC(C)CC(C)CCC(C)C	0.325714
48.889	48.554	Train	485	CCC(C)CC(C)CCCO	0.334976
41.743	42.1924	Train	424.15	CCC(C)CC(C)O	0.449375
41.215	42.0007	Train	472.15	CCC(C)CC(CC)(CC)CC	0.785732
40.355	40.483	Train	463.15	CCC(C)CC(CC)C(C)(C)C	0.12804
38.945	39.1529	Train	449.15	CCC(C)CC(CC)C(C)C	0.207885
37.7	37.1808	Train	431.36	CCC(C)CC(CC)CC	0.519187
40.355	40.7211	Train	463.15	CCC(C)CC(CC)CC(C)C	0.36606
46.851	47.0919	Train	468.15	CCC(C)CC(CC)CO	0.24094
47.243	47.266	Train	474.15	CCC(C)CC(CO)C(C)C	0.02302
46.241	46.0365	Train	464	CCC(C)CC(O)C(C)CC	0.204528
42.28	42.2678	Train	426.75	CCC(C)CC(O)CC	0.01221
46.241	46.1164	Train	464	CCC(C)CC(O)CC(C)C	0.1246
36.65	36.2154	Train	423.96	CCC(C)CCC(C)(C)C	0.43462
40.928	40.999	Train	469.15	CCC(C)CCC(C)(C)C(C)C	0.070966
38.651	39.1179	Train	450.15	CCC(C)CCC(C)(C)CC	0.466912
41.215	41.8584	Train	472.15	CCC(C)CCC(C)(CC)CC	0.643368
45.867	45.7573	Train	465.15	CCC(C)CCC(C)(O)CC	0.109725
35.61	35.1315	Train	409.16	CCC(C)CCC(C)C	0.478515
40.737	40.8188	Train	467.15	CCC(C)CCC(C)C(C)(C)C	0.081848
39.309	39.2108	Train	453.15	CCC(C)CCC(C)C(C)C	0.098154
41.31	41.5985	Train	473.15	CCC(C)CCC(C)C(C)CC	0.288534
38.07	37.4185	Train	433.96	CCC(C)CCC(C)CC	0.65151
40.737	41.0816	Train	467.15	CCC(C)CCC(C)CC(C)C	0.344627
44.171	43.9252	Train	445.05	CCC(C)CCC(C)O	0.245768
41.024	41.3653	Train	470.15	CCC(C)CCC(CC)C(C)C	0.341288
39.848	39.6713	Train	455.15	CCC(C)CCC(CC)CC	0.17666
45.898	45.6449	Train	459	CCC(C)CCC(O)CC	0.253076
38.381	38.5184	Train	447.15	CCC(C)CCCC(C)(C)C	0.13739
40.833	41.0746	Train	468.15	CCC(C)CCCC(C)(C)CC	0.241574
38.2	37.4477	Train	433.54	CCC(C)CCCC(C)C	0.752326
41.31	41.629	Train	473.15	CCC(C)CCCC(CC)CC	0.318998
39.664	39.3479	Train	453.15	CCC(C)CCCCC(C)C	0.316107
41.789	42.1073	Train	478.15	CCC(C)CCCCC(C)CC	0.31834
48.469	49.7594	Train	479.15	CCC(C)CCCCCO	1.29037
46.147	47.2555	Train	459.75	CCC(C)CCCCO	1.10846
44.444	45.5803	Train	446.15	CCC(C)CCCO	1.13634
40.575	43.3853	Train	425.55	CCC(C)CCO	2.81025
44.75	41.8849	Train	401.85	CCC(C)CO	2.86512
31.413	32.0584	Train	363.15	CCC(C)COC	0.64538
36.88	37.554	Train	413.15	CCC(C)COC(C)=O	0.674043
34.454	35.5768	Train	393.76	CCC(C)COC=O	1.1228
41.424	41.8579	Train	470.15	CCC(C)Cc1ccccc1	0.433944
40.96	38.9052	Train	372.7	CCC(C)O	2.05484
28.89	29.2469	Train	332.15	CCC(C)OC	0.356937
34.68	35.0766	Train	385.15	CCC(C)OC(C)=O	0.3966
34.3	34.6301	Train	394.2	CCC(C)OC(C)CC	0.33009
31.35	33.1225	Train	363.55	CCC(C)OC=O	1.77251
47.995	49.8934	Train	515.25	CCC(C)c1ccc(O)cc1	1.89844
52.148	52.4851	Train	585.41	CCC(C)c1ccc2ccccc2c1	0.33706
41.086	41.3065	Train	467.15	CCC(C)c1cccc(C)c1	0.220507
47.485	49.0645	Train	510	CCC(C)c1cccc(O)c1	1.5795
52.148	52.313	Train	585.41	CCC(C)c1cccc2ccccc12	0.165026
39.12	39.6466	Train	446.48	CCC(C)c1ccccc1	0.52659
41.27	41.5473	Train	469.15	CCC(C)c1ccccc1C	0.277264
39.402	39.3525	Train	453.15	CCC(CC(C)(C)C)C(C)(C)C	0.04947
37.328	37.8209	Train	439.15	CCC(CC(C)(C)C)C(C)C	0.49286
40.641	40.9151	Train	466.15	CCC(CC(C)C(C)C)C(C)C	0.274115
37.685	38.2485	Train	443.15	CCC(CC(C)C)C(C)(C)C	0.5635
40.546	40.9232	Train	465.15	CCC(CC(C)C)C(C)(C)CC	0.37724
36.82	36.6836	Train	427.26	CCC(CC(C)C)C(C)C	0.136406
40.355	40.6445	Train	463.15	CCC(CC(C)C)C(C)C(C)C	0.28948
39.402	39.4784	Train	453.15	CCC(CC(C)C)CC(C)(C)C	0.076382
39.381	40.3764	Train	462.15	CCC(CC)(C(C)C)C(C)C	0.99543
40.355	40.5299	Train	463.15	CCC(CC)(CC(C)C)C(C)C	0.17488
38.999	40.464	Train	462.15	CCC(CC)(CC)C(C)(C)C	1.46505
41.693	42.3174	Train	477.15	CCC(CC)(CC)C(C)C(C)C	0.62444
45.163	44.2996	Train	461	CCC(CC)(CC)C(C)O	0.863424
35.28	35.9337	Train	419.34	CCC(CC)(CC)CC	0.6537
41.119	41.4119	Train	471.15	CCC(CC)(CC)CCC(C)C	0.29295
43.784	44.9437	Train	446	CCC(CC)(CC)CO	1.15968
40.355	40.7274	Train	463.15	CCC(CC)C(C(C)C)C(C)C	0.372398
34.37	34.6264	Train	406.99	CCC(CC)C(C)(C)C	0.25644
38.845	39.6015	Train	456.15	CCC(CC)C(C)(C)C(C)C	0.75651
37.11	37.6146	Train	436.06	CCC(CC)C(C)(C)CC	0.504586
40.546	40.6814	Train	465.15	CCC(CC)C(C)(C)CC(C)C	0.13541
41.693	42.2842	Train	477.15	CCC(CC)C(C)(CC)C(C)C	0.591172
39.462	40.2783	Train	459.15	CCC(CC)C(C)(CC)CC	0.81632
44.244	44.6297	Train	452	CCC(CC)C(C)(O)CC	0.385677
36.809	36.5321	Train	411.15	CCC(CC)C(C)=O	0.276896
32.97	33.2504	Train	388.81	CCC(CC)C(C)C	0.280412
41.215	41.8003	Train	472.15	CCC(CC)C(C)C(C)(C)CC	0.58533
37.24	37.3286	Train	434.06	CCC(CC)C(C)C(C)C	0.088648
41.024	41.5607	Train	470.15	CCC(CC)C(C)C(C)C(C)C	0.53666
41.31	42.3913	Train	473.15	CCC(CC)C(C)C(CC)CC	1.08132
40.069	40.3129	Train	460.15	CCC(CC)C(C)CC(C)(C)C	0.243862
38.945	39.2661	Train	449.15	CCC(CC)C(C)CC(C)C	0.32108
41.024	41.3383	Train	470.15	CCC(CC)C(C)CCC(C)C	0.314337
44.476	44.8018	Train	448	CCC(CC)C(C)CO	0.325765
41.845	42.6685	Train	425.15	CCC(CC)C(C)O	0.823533
41.884	43.0239	Train	479.15	CCC(CC)C(CC)(CC)CC	1.13985
40.355	40.8006	Train	463.15	CCC(CC)C(CC)C(C)(C)C	0.44561
39.218	39.6761	Train	452.15	CCC(CC)C(CC)C(C)C	0.4581
37.66	38.0413	Train	437.06	CCC(CC)C(CC)CC	0.381283
44.918	45.0215	Train	460.15	CCC(CC)C(O)C(C)(C)C	0.103545
44.729	44.8597	Train	452	CCC(CC)C(O)C(C)C	0.130673
40.737	40.8533	Train	467.15	CCC(CC)CC(C)(C)C(C)C	0.11626
41.024	41.7378	Train	470.15	CCC(CC)CC(C)(CC)CC	0.71384
35.65	34.9491	Train	406.96	CCC(CC)CC(C)C	0.700896
40.546	40.6497	Train	465.15	CCC(CC)CC(C)C(C)(C)C	0.10368
41.119	41.8143	Train	471.15	CCC(CC)CC(C)C(C)CC	0.695293
40.546	40.9029	Train	465.15	CCC(CC)CC(C)CC(C)C	0.3569
40.833	41.2486	Train	468.15	CCC(CC)CC(CC)C(C)C	0.41559
39.573	39.5365	Train	452.15	CCC(CC)CC(CC)CC	0.036512
40.928	41.3559	Train	469.15	CCC(CC)CCC(C)(C)CC	0.427938
37.74	37.3487	Train	432.86	CCC(CC)CCC(C)C	0.39127
41.215	41.4562	Train	472.15	CCC(CC)CCC(C)C(C)C	0.24117
41.502	41.9462	Train	475.15	CCC(CC)CCC(CC)CC	0.44425
40.641	40.741	Train	466.15	CCC(CC)CCCC(C)(C)C	0.09999
39.848	39.4807	Train	455.15	CCC(CC)CCCC(C)C	0.36731
41.502	41.5411	Train	475.15	CCC(CC)CCCCC(C)C	0.03907
47.716	48.5998	Train	472	CCC(CC)CCCCO	0.883773
45.442	46.2814	Train	453	CCC(CC)CCCO	0.839403
43.718	44.5528	Train	439.15	CCC(CC)CCO	0.834845
31.232	31.8654	Train	361.15	CCC(CC)OC	0.633412
36.193	36.9079	Train	405.15	CCC(CC)OC(C)=O	0.71486
40.069	40.1016	Train	460.15	CCC(CCC(C)(C)C)C(C)C	0.032555
40.355	40.3743	Train	463.15	CCC(CCC(C)C)C(C)(C)C	0.019313
38.945	38.8006	Train	449.15	CCC(CCC(C)C)C(C)C	0.144413
40.355	40.4894	Train	463.15	CCC(CCC(C)C)CC(C)C	0.13436
40.928	41.0654	Train	469.15	CCC(CCCC(C)C)C(C)C	0.13743
43.353	44.336	Train	446	CCC(CO)C(C)(C)C	0.982953
42.872	44.2271	Train	435.15	CCC(CO)C(C)C	1.35509
59.008	59.1284	Train	508.21	CCC(CO)C(C)CO	0.12044
55.376	55.8249	Train	480	CCC(CO)C(C)O	0.44889
44.646	45.2814	Train	449.65	CCC(CO)CC(C)C	0.63542
48.011	48.7904	Train	486	CCC(CO)CCC(C)(C)C	0.77942
46.627	47.0953	Train	466	CCC(CO)CCC(C)C	0.468257
44.413	44.8261	Train	464.15	CCC(O)(C(C)C)C(C)(C)C	0.41308
42.857	43.1755	Train	447.15	CCC(O)(CC)C(C)(C)C	0.318484
42.052	42.6016	Train	433.15	CCC(O)(CC)C(C)C	0.54957
40.42	40.9186	Train	415.65	CCC(O)(CC)CC	0.498648
44.424	44.6394	Train	460	CCC(O)(CC)CC(C)(C)C	0.215442
43.545	43.639	Train	445.15	CCC(O)(CC)CC(C)C	0.09396
53.926	53.3226	Train	473.15	CCC(O)(CC)CO	0.603437
39.368	40.0458	Train	409.15	CCC(O)C(C)(C)C	0.677845
41.95	42.401	Train	432.15	CCC(O)C(C)(C)CC	0.45099
55.104	55.5715	Train	485.65	CCC(O)C(C)(C)CO	0.467472
57.187	58.4161	Train	505.76	CCC(O)C(C)(C)O	1.22908
58.799	58.9692	Train	517.03	CCC(O)C(C)(O)CC	0.17019
42.092	42.2475	Train	429	CCC(O)C(C)C(C)C	0.15548
61.135	61.2913	Train	530.99	CCC(O)C(C)C(C)O	0.156344
46.449	46.3544	Train	466	CCC(O)C(C)C(CC)CC	0.094588
57.402	57.4567	Train	496.94	CCC(O)C(O)CC	0.05469
41.343	41.4756	Train	426.15	CCC(O)CC(C)(C)C	0.132647
58.799	59.3982	Train	517.03	CCC(O)CC(C)(C)O	0.59924
41.435	42.3449	Train	421.15	CCC(O)CC(C)C	0.909925
42.925	42.8059	Train	433	CCC(O)CCC(C)C	0.11909
45.898	45.8787	Train	459	CCC(O)CCCC(C)C	0.019296
61.892	62.76	Train	529.15	CCC(O)CCCO	0.867964
57.394	57.8569	Train	494.15	CCC(O)CCO	0.462895
49.326	50.1065	Train	556.37	CCC(c1ccccc1)c1ccccc1	0.78053
27.819	27.837	Train	329.92	CCC1(C)CC1	0.017958
34.604	34.8103	Train	409.15	CCC1(C)CCC(C)C1	0.20628
33.23	33.7285	Train	394.67	CCC1(C)CCCC1	0.498508
35.314	35.5174	Train	417.15	CCC1(C)CCCC1C	0.20343
36.297	36.5385	Train	423.65	CCC1(CC)CCCC1	0.24154
43.706	43.2871	Train	498.15	CCC12CCCCC1CCCC2	0.41895
32.343	32.6397	Train	379.48	CCC1=CCCC1	0.29673
35.026	35.4349	Train	410.14	CCC1=CCCCC1	0.408914
34.602	34.826	Train	410.15	CCC1C(C)CCC1C	0.223974
35.222	35.4522	Train	417.15	CCC1C(C)CCC1C	0.23025
35.931	36.1679	Train	425.15	CCC1C(C)CCC1C	0.236946
31.579	31.7338	Train	370.92	CCC1C=CCC1	0.15482
34.544	34.8123	Train	404.76	CCC1C=CCCC1	0.26834
35.488	35.7201	Train	420.15	CCC1CC(C)C(C)C1	0.23212
35.488	35.7201	Train	420.15	CCC1CC(C)C(C)C1	0.23212
34.868	35.0939	Train	413.15	CCC1CC(C)C(C)C1	0.225853
34.602	34.81	Train	410.15	CCC1CC(C)CC1C	0.20799
35.311	35.5257	Train	418.15	CCC1CC(C)CC1C	0.21469
39.397	40.6496	Train	464.15	CCC1CC(C)CC1C	1.25258
26.106	26.1755	Train	309.08	CCC1CC1	0.069531
28.679	28.5998	Train	340.16	CCC1CC1C	0.079236
27.941	27.8527	Train	331.81	CCC1CC1C	0.088264
31.618	31.8311	Train	371.36	CCC1CC=CC1	0.213133
34.669	35.0159	Train	406.15	CCC1CC=CCC1	0.34685
34.427	34.6166	Train	407.15	CCC1CCC(C)(C)C1	0.189577
33.37	33.5708	Train	394.25	CCC1CCC(C)C1	0.200778
35.931	36.1608	Train	425.15	CCC1CCC(C)C1C	0.229828
35.311	35.5346	Train	418.15	CCC1CCC(C)C1C	0.22357
34.691	34.9083	Train	411.15	CCC1CCC(C)C1C	0.217348
35.311	35.5346	Train	418.15	CCC1CCC(C)C1C	0.22357
35.979	36.3138	Train	424.15	CCC1CCC(C)CC1	0.334847
35.712	36.0455	Train	421.15	CCC1CCC(C)CC1	0.33347
36.155	36.3227	Train	423.15	CCC1CCC(CC)C1	0.16767
36.155	36.3227	Train	423.15	CCC1CCC(CC)C1	0.167678
43.995	43.3968	Train	501.15	CCC1CCC2CCCCC2C1	0.598195
44.668	44.2037	Train	508.15	CCC1CCC2CCCCC2C1	0.464288
35.712	36.0015	Train	421.15	CCC1CCCC(C)C1	0.28954
35.979	36.2699	Train	424.15	CCC1CCCC(C)C1	0.290928
32.25	32.2707	Train	376.62	CCC1CCCC1	0.02071
34.782	34.9937	Train	411.15	CCC1CCCC1(C)C	0.211725
33.988	34.1481	Train	401.2	CCC1CCCC1C	0.16009
46.595	46.9053	Train	528.15	CCC1CCCC2CCCCC12	0.31034
47.078	47.6669	Train	533.15	CCC1CCCC2CCCCC12	0.58888
34.16	34.8596	Train	404.95	CCC1CCCCC1	0.699646
36.433	36.6725	Train	429.25	CCC1CCCCC1C	0.239466
36.041	36.2788	Train	424.85	CCC1CCCCC1C	0.23782
45.108	45.5082	Train	512.72	CCC1CCCc2ccccc21	0.400224
33.777	33.991	Train	389.15	CCC1CCOC1	0.214013
29.17	29.7463	Train	336.57	CCC1CO1	0.576323
28.9	28.9098	Train	340.45	CCC=C(C)C	0.009765
32.842	33.0613	Train	387.15	CCC=C(C)C(C)C	0.219256
31.28	31.5055	Train	368.55	CCC=C(C)CC	0.225545
33.856	34.0223	Train	395.15	CCC=C(C)CCC	0.166255
33.856	34.0222	Train	395.15	CCC=C(C)CCC	0.16625
33.317	33.4251	Train	389.15	CCC=C(CC)CC	0.10807
50.44	51.092	Train	567.85	CCC=C(c1ccccc1)c1ccccc1	0.652033
41.677	45.3095	Train	458.15	CCC=CC(=O)O	3.63254
31.325	31.6922	Train	374	CCC=CC(C)(C)C	0.367205
30.398	30.6256	Train	359.05	CCC=CC(C)C	0.227633
30.407	30.6346	Train	359.15	CCC=CC(C)C	0.22755
32.917	33.0293	Train	385.15	CCC=CC(C)CC	0.11231
28.88	29.0717	Train	339.6	CCC=CCC	0.191661
33.186	33.3028	Train	388.15	CCC=CCC(C)C	0.11681
33.186	33.3028	Train	388.15	CCC=CCC(C)C	0.116814
31.49	31.8156	Train	368.82	CCC=CCCC	0.3256
31.58	31.8227	Train	368.9	CCC=CCCC	0.242748
33.67	34.4833	Train	396.45	CCC=CCCCC	0.813334
34.202	34.4475	Train	396.05	CCC=CCCCC	0.24551
41.453	42.1723	Train	471.83	CCC=Cc1ccccc1	0.719287
28.64	29.2548	Train	321.15	CCC=O	0.614808
22.44	22.6416	Train	272.65	CCCC	0.20165
36.341	36.1979	Train	406.15	CCCC(=O)C(C)C	0.14314
35.32	35.4293	Train	396.65	CCCC(=O)CC	0.10929
37.724	37.3727	Train	417.15	CCCC(=O)CCC	0.35131
45.29	44.0847	Train	436.42	CCCC(=O)O	1.20532
33.3	34.5256	Train	375.9	CCCC(=O)OC	1.22557
46.73	46.1829	Train	468.15	CCCC(=O)OC(=O)CCC	0.547093
36.391	37.3493	Train	409.15	CCCC(=O)OC(C)(C)C	0.958274
47.111	44.0445	Train	460.31	CCCC(=O)OC(C)(C)CC	3.06648
36.024	36.9199	Train	404.15	CCCC(=O)OC(C)C	0.895895
46.815	44.1263	Train	462.66	CCCC(=O)OC(C)C(C)C	2.6887
38.214	39.8924	Train	425.15	CCCC(=O)OC(C)CC	1.67841
43.816	43.5554	Train	455.15	CCCC(=O)OC(C)CCC	0.260645
46.793	44.2116	Train	463.1	CCCC(=O)OC(CC)CC	2.58141
35.11	36.118	Train	394.65	CCCC(=O)OCC	1.00796
41.509	42.4843	Train	452.15	CCCC(=O)OCC(C)CC	0.97533
41.638	42.0601	Train	452.15	CCCC(=O)OCCC(C)C	0.422066
40.928	41.1167	Train	469.15	CCCC(C(C)(C)C)C(C)(C)C	0.18873
37.863	38.4295	Train	445.15	CCCC(C(C)C)C(C)(C)C	0.56655
40.737	41.1592	Train	467.15	CCCC(C(C)C)C(C)(C)CC	0.422203
40.546	40.8404	Train	465.15	CCCC(C(C)C)C(C)C(C)C	0.2944
39.036	39.34	Train	450.15	CCCC(C(C)C)C(C)CC	0.30401
40.833	41.712	Train	468.15	CCCC(C(C)C)C(CC)CC	0.87904
40.355	40.5662	Train	463.15	CCCC(C(C)CC)C(C)(C)C	0.211185
40.928	41.8202	Train	469.15	CCCC(C(C)CC)C(C)CC	0.892183
29.26	29.6981	Train	352.34	CCCC(C)(C)C	0.438118
36.36	36.957	Train	433.48	CCCC(C)(C)C(C)(C)C	0.596963
41.597	41.835	Train	476.15	CCCC(C)(C)C(C)(C)C(C)C	0.237976
38.557	39.7129	Train	457.15	CCCC(C)(C)C(C)(C)CC	1.15592
41.31	41.9238	Train	473.15	CCCC(C)(C)C(C)(C)CCC	0.61381
41.789	42.5977	Train	478.15	CCCC(C)(C)C(C)(CC)CC	0.808664
34.98	34.9963	Train	410.84	CCCC(C)(C)C(C)C	0.016307
41.502	41.7276	Train	475.15	CCCC(C)(C)C(C)C(C)(C)C	0.225623
38.399	38.9701	Train	451.15	CCCC(C)(C)C(C)C(C)C	0.5711
37.07	37.2315	Train	434.26	CCCC(C)(C)C(C)CC	0.161537
42.036	42.4459	Train	433	CCCC(C)(C)C(C)O	0.409915
40.737	41.0026	Train	467.15	CCCC(C)(C)C(CC)C(C)C	0.265625
38.561	39.1338	Train	449.15	CCCC(C)(C)C(CC)CC	0.57281
32.64	32.7451	Train	385.12	CCCC(C)(C)CC	0.10509
37.319	38.3575	Train	443.15	CCCC(C)(C)CC(C)(C)C	1.03852
36.36	36.289	Train	424.16	CCCC(C)(C)CC(C)C	0.07103
40.833	40.9959	Train	468.15	CCCC(C)(C)CC(C)C(C)C	0.16291
35.36	34.9671	Train	408.36	CCCC(C)(C)CCC	0.392894
39.783	39.7882	Train	457.15	CCCC(C)(C)CCC(C)(C)C	0.005216
38.201	38.3949	Train	445.15	CCCC(C)(C)CCC(C)C	0.19392
44.603	45.0993	Train	454	CCCC(C)(C)CCO	0.496327
41.485	42.858	Train	426.15	CCCC(C)(C)CO	1.37304
37.132	39.3471	Train	394.56	CCCC(C)(C)O	2.21509
40.546	40.6916	Train	465.15	CCCC(C)(CC(C)C)C(C)C	0.145605
41.789	42.6179	Train	478.15	CCCC(C)(CC)C(C)(C)CC	0.82891
37.2	37.4894	Train	436.86	CCCC(C)(CC)C(C)C	0.289414
41.119	41.3149	Train	471.15	CCCC(C)(CC)C(C)C(C)C	0.195922
41.406	42.3322	Train	474.15	CCCC(C)(CC)C(CC)CC	0.926214
35.73	35.4439	Train	413.76	CCCC(C)(CC)CC	0.286053
40.737	41.2721	Train	467.15	CCCC(C)(CC)CC(C)(C)C	0.535125
38.021	38.3822	Train	443.15	CCCC(C)(CC)CC(C)C	0.361233
40.355	40.6296	Train	463.15	CCCC(C)(CC)CC(C)CC	0.274585
37.32	37.4283	Train	433.96	CCCC(C)(CC)CCC	0.108253
40.641	40.8888	Train	466.15	CCCC(C)(CC)CCC(C)C	0.24776
44.219	45.4253	Train	450.25	CCCC(C)(CC)CO	1.20625
38.921	39.3825	Train	453.15	CCCC(C)(CCC)C(C)C	0.461545
41.119	41.7812	Train	471.15	CCCC(C)(CCC)C(C)CC	0.662235
39.089	39.3468	Train	451.15	CCCC(C)(CCC)CCC	0.25784
58.541	58.9813	Train	509.85	CCCC(C)(CO)CO	0.4403
42.767	43.4267	Train	446.25	CCCC(C)(O)C(C)(C)C	0.659697
41.869	42.7646	Train	431.35	CCCC(C)(O)C(C)C	0.895565
40.45	41.3524	Train	415.95	CCCC(C)(O)CC	0.902448
43.484	43.8612	Train	444.55	CCCC(C)(O)CC(C)C	0.37716
45.748	45.8604	Train	464	CCCC(C)(O)CC(C)CC	0.112413
45.867	46.0319	Train	465.15	CCCC(C)(O)CCC(C)C	0.164925
55.918	56.4312	Train	490	CCCC(C)(O)CO	0.51325
33.575	33.8652	Train	394.92	CCCC(C)=C(C)C	0.290185
33.47	33.4743	Train	375.46	CCCC(C)=O	0.004308
40.546	40.8296	Train	465.15	CCCC(C)C(C(C)C)C(C)C	0.283647
34.77	34.5893	Train	406.75	CCCC(C)C(C)(C)C	0.18069
41.31	41.5201	Train	473.15	CCCC(C)C(C)(C)C(C)(C)C	0.210054
41.406	41.7828	Train	474.15	CCCC(C)C(C)(C)C(C)CC	0.37682
37.2	37.4025	Train	435.06	CCCC(C)C(C)(C)CC	0.202515
40.451	40.5894	Train	464.15	CCCC(C)C(C)(C)CC(C)C	0.13844
38.921	39.5053	Train	453.15	CCCC(C)C(C)(C)CCC	0.584333
42.062	42.5318	Train	433.25	CCCC(C)C(C)(C)O	0.469754
41.597	42.0863	Train	476.15	CCCC(C)C(C)(CC)C(C)C	0.489258
41.31	42.1211	Train	473.15	CCCC(C)C(C)(CC)CCC	0.811147
36.997	36.5603	Train	413.15	CCCC(C)C(C)=O	0.436682
33.18	33.2413	Train	388.76	CCCC(C)C(C)C	0.06135
38.22	38.8326	Train	449.15	CCCC(C)C(C)C(C)(C)C	0.612558
41.119	41.5636	Train	471.15	CCCC(C)C(C)C(C)(C)CC	0.44462
37.32	37.1728	Train	433.06	CCCC(C)C(C)C(C)C	0.147217
41.024	41.2925	Train	470.15	CCCC(C)C(C)C(C)C(C)C	0.26853
39.4	39.7452	Train	454.15	CCCC(C)C(C)C(C)CC	0.345186
41.215	42.1539	Train	472.15	CCCC(C)C(C)C(CC)CC	0.938915
36.36	35.5322	Train	413.76	CCCC(C)C(C)CC	0.827804
40.069	40.2141	Train	460.15	CCCC(C)C(C)CC(C)(C)C	0.14512
38.945	39.1493	Train	449.15	CCCC(C)C(C)CC(C)C	0.204345
41.024	41.7446	Train	470.15	CCCC(C)C(C)CC(C)CC	0.72062
37.87	37.5878	Train	435.29	CCCC(C)C(C)CCC	0.282205
40.928	41.2414	Train	469.15	CCCC(C)C(C)CCC(C)C	0.313425
48.889	48.4062	Train	485	CCCC(C)C(C)CCCO	0.482758
44.372	44.6243	Train	447	CCCC(C)C(C)CO	0.2523
41.789	42.8506	Train	478.15	CCCC(C)C(CC)(CC)CC	1.06162
40.546	40.9428	Train	465.15	CCCC(C)C(CC)C(C)(C)C	0.39684
39.218	39.5974	Train	452.15	CCCC(C)C(CC)C(C)C	0.37941
41.024	41.9825	Train	470.15	CCCC(C)C(CC)C(C)CC	0.958487
40.546	41.1299	Train	465.15	CCCC(C)C(CC)CC(C)C	0.583898
39.664	39.8141	Train	453.15	CCCC(C)C(CC)CCC	0.15014
40.928	41.9267	Train	469.15	CCCC(C)C(CCC)CCC	0.99869
42.466	42.5766	Train	428.55	CCCC(C)C(O)CC	0.11063
46.241	46.302	Train	464	CCCC(C)C(O)CC(C)C	0.06096
45.481	45.7889	Train	455	CCCC(C)C(O)CCC	0.307948
31.19	31.2513	Train	365	CCCC(C)CC	0.061295
36.4	36.018	Train	421.46	CCCC(C)CC(C)(C)C	0.38201
40.737	40.879	Train	467.15	CCCC(C)CC(C)(C)C(C)C	0.142032
38.381	38.9933	Train	447.15	CCCC(C)CC(C)(C)CC	0.61234
44.55	44.8117	Train	455	CCCC(C)CC(C)(C)O	0.261684
40.928	41.6484	Train	469.15	CCCC(C)CC(C)(CC)CC	0.72036
45.954	45.8435	Train	466	CCCC(C)CC(C)(O)CC	0.1105
35.36	34.8845	Train	406.05	CCCC(C)CC(C)C	0.475524
40.546	40.6761	Train	465.15	CCCC(C)CC(C)C(C)(C)C	0.13013
39.036	39.1598	Train	450.15	CCCC(C)CC(C)C(C)C	0.12375
41.024	41.7436	Train	470.15	CCCC(C)CC(C)C(C)CC	0.719553
40.546	40.9611	Train	465.15	CCCC(C)CC(C)CC(C)C	0.415132
39.573	39.6541	Train	452.15	CCCC(C)CC(C)CCC	0.08109
44.14	44.1917	Train	444.75	CCCC(C)CC(C)O	0.05174
40.737	41.1967	Train	467.15	CCCC(C)CC(CC)C(C)C	0.45973
39.664	39.7106	Train	453.15	CCCC(C)CC(CC)CC	0.046587
40.928	41.6842	Train	469.15	CCCC(C)CC(CC)CCC	0.75615
33.88	33.6668	Train	390.86	CCCC(C)CCC	0.21319
41.119	41.725	Train	471.15	CCCC(C)CCC(C)(C)CC	0.605968
37.82	37.2329	Train	431.66	CCCC(C)CCC(C)C	0.587075
41.119	41.3661	Train	471.15	CCCC(C)CCC(C)C(C)C	0.24708
39.848	39.6987	Train	455.15	CCCC(C)CCC(C)CC	0.14933
41.215	41.6664	Train	472.15	CCCC(C)CCC(C)CCC	0.4514
45.377	44.6634	Train	454	CCCC(C)CCC(C)O	0.713567
41.31	41.7567	Train	473.15	CCCC(C)CCC(CC)CC	0.446718
40.355	40.4341	Train	463.15	CCCC(C)CCCC(C)(C)C	0.079116
39.573	39.1835	Train	452.15	CCCC(C)CCCC(C)C	0.38945
41.502	41.9008	Train	475.15	CCCC(C)CCCC(C)CC	0.398764
49.099	48.4643	Train	487	CCCC(C)CCCC(C)O	0.634675
41.502	41.6828	Train	475.15	CCCC(C)CCCCC(C)C	0.180793
47.821	48.3921	Train	473	CCCC(C)CCCCO	0.571113
45.792	46.326	Train	456.35	CCCC(C)CCCO	0.53401
44.34	45.2098	Train	445.15	CCCC(C)CCO	0.869843
45.73	43.4671	Train	421.15	CCCC(C)CO	2.26295
31.504	32.1046	Train	364.15	CCCC(C)OC	0.60062
42.198	41.9821	Train	440.22	CCCC(C)OC(=O)CC	0.21589
36.229	37.2449	Train	406.15	CCCC(C)OC(C)=O	1.01594
34.71	35.8067	Train	393.76	CCCC(C)OC=O	1.09666
50.272	50.6598	Train	566.12	CCCC(C1CCCCC1)C1CCCCC1	0.38783
39.592	39.7186	Train	455.15	CCCC(CC(C)(C)C)C(C)C	0.126643
38.582	38.6119	Train	445.15	CCCC(CC(C)C)C(C)C	0.029862
40.355	40.7406	Train	463.15	CCCC(CC(C)C)C(C)CC	0.385578
39.84	40.1156	Train	457.75	CCCC(CC(C)C)CC(C)C	0.275623
40.546	40.9273	Train	465.15	CCCC(CC(C)CC)C(C)C	0.381307
41.31	41.7085	Train	473.15	CCCC(CC)(C(C)C)C(C)C	0.398466
39.462	40.1918	Train	459.15	CCCC(CC)(CC)C(C)C	0.72979
41.693	42.6983	Train	477.15	CCCC(CC)(CC)C(C)CC	1.0053
37.61	38.1315	Train	439.46	CCCC(CC)(CC)CC	0.5215
41.31	41.8831	Train	473.15	CCCC(CC)(CCC)C(C)C	0.573095
41.024	41.9838	Train	470.15	CCCC(CC)(CCC)CCC	0.959845
36.69	36.7185	Train	429.26	CCCC(CC)C(C)(C)C	0.028494
41.215	41.3548	Train	472.15	CCCC(CC)C(C)(C)C(C)C	0.139782
38.921	39.584	Train	453.15	CCCC(CC)C(C)(C)CC	0.66301
40.928	41.6181	Train	469.15	CCCC(CC)C(C)(C)CCC	0.690126
35.98	35.3382	Train	411.16	CCCC(CC)C(C)C	0.641785
39.218	39.4694	Train	452.15	CCCC(CC)C(C)C(C)C	0.251368
41.119	42.0057	Train	471.15	CCCC(CC)C(C)C(C)CC	0.886707
37.66	37.6917	Train	435.36	CCCC(CC)C(C)CC	0.031677
40.641	41.307	Train	466.15	CCCC(CC)C(C)CC(C)C	0.666037
43.767	44.312	Train	441.15	CCCC(CC)C(C)O	0.54496
41.024	42.1943	Train	470.15	CCCC(CC)C(CC)CCC	1.1703
33.69	33.7407	Train	391.69	CCCC(CC)CC	0.050738
37.841	38.1589	Train	441.15	CCCC(CC)CC(C)(C)C	0.31795
40.451	41.0405	Train	464.15	CCCC(CC)CC(C)(C)CC	0.5895
37.36	37.0516	Train	429.36	CCCC(CC)CC(C)C	0.30839
39.298	39.2443	Train	449.15	CCCC(CC)CC(C)CC	0.053653
46.538	46.5308	Train	465.15	CCCC(CC)CC(C)O	0.007223
41.024	41.7228	Train	470.15	CCCC(CC)CC(CC)CC	0.69884
36.65	35.8742	Train	414.36	CCCC(CC)CCC	0.77577
40.26	40.4235	Train	462.15	CCCC(CC)CCC(C)(C)C	0.16348
39.481	39.129	Train	451.15	CCCC(CC)CCC(C)C	0.35204
41.119	41.3198	Train	471.15	CCCC(CC)CCCC(C)C	0.20077
43.718	45.5029	Train	439.15	CCCC(CC)CO	1.78489
40.451	40.5813	Train	464.15	CCCC(CCC(C)C)C(C)C	0.130303
38.381	38.783	Train	447.15	CCCC(CCC)C(C)(C)C	0.40201
40.928	41.6951	Train	469.15	CCCC(CCC)C(C)(C)CC	0.767084
37.45	37.2887	Train	432.06	CCCC(CCC)C(C)C	0.161273
40.737	41.1275	Train	467.15	CCCC(CCC)C(C)C(C)C	0.390487
40.928	42.1024	Train	469.15	CCCC(CCC)C(CC)CC	1.17438
39.783	40.0708	Train	457.15	CCCC(CCC)CC(C)(C)C	0.2878
39.114	38.9734	Train	447.15	CCCC(CCC)CC(C)C	0.140634
40.737	41.3984	Train	467.15	CCCC(CCC)CC(C)CC	0.661384
47.141	48.98	Train	473.74	CCCC(CO)C(C)C	1.83902
48.485	48.6812	Train	481.15	CCCC(CO)CC(C)CC	0.19624
45.353	46.975	Train	452.15	CCCC(CO)CCC	1.62201
56.831	56.211	Train	485.43	CCCC(CO)CCO	0.620024
55.244	55.5477	Train	474.16	CCCC(CO)CO	0.303672
44.613	44.6546	Train	457.15	CCCC(O)(C(C)C)C(C)C	0.041606
42.367	42.8359	Train	432.15	CCCC(O)(CC)CC	0.46891
44.695	45.1449	Train	452.15	CCCC(O)(CC)CCC	0.449905
45.661	46.0154	Train	463.15	CCCC(O)(CCC)C(C)C	0.354373
41.657	42.1622	Train	429.25	CCCC(O)C(C)(C)C	0.505163
43.953	44.1983	Train	449.15	CCCC(O)C(C)(C)CC	0.24535
41.128	42.1184	Train	418.15	CCCC(O)C(C)C	0.99043
43.426	43.7698	Train	437.85	CCCC(O)C(C)CC	0.34385
55.155	54.8827	Train	478.15	CCCC(O)C(C)O	0.272332
38.123	41.7461	Train	408.55	CCCC(O)CC	3.62309
43.749	43.8062	Train	447.15	CCCC(O)CC(C)(C)C	0.05719
43.571	44.1251	Train	439.25	CCCC(O)CC(C)C	0.554076
45.481	45.5713	Train	455	CCCC(O)CC(C)CC	0.09028
59.008	58.1459	Train	508.21	CCCC(O)CC(C)O	0.862126
45.481	45.2673	Train	455	CCCC(O)CCC(C)C	0.213716
48.574	48.9537	Train	482	CCCC(O)CCC(C)CC	0.379747
63.843	63.8536	Train	543.15	CCCC(O)CCCO	0.01057
59.35	58.9329	Train	508.15	CCCC(O)CCO	0.41711
49.43	50.2303	Train	557.44	CCCC(c1ccccc1)c1ccccc1	0.800293
29.203	29.3221	Train	342.3	CCCC1CC1	0.119138
35.976	36.1216	Train	421.15	CCCC1CCC(C)C1	0.14563
35.976	36.1216	Train	421.15	CCCC1CCC(C)C1	0.145628
34.59	34.9262	Train	404.11	CCCC1CCCC1	0.336243
36.387	36.4923	Train	425.73	CCCC1CCCC1C	0.105317
35.83	35.9368	Train	419.52	CCCC1CCCC1C	0.106768
47.175	47.419	Train	534.15	CCCC1CCc2ccccc2C1	0.24403
33.766	33.9214	Train	394.15	CCCC=C(C)CC	0.155448
51.807	52.4061	Train	581.91	CCCC=C(c1ccccc1)c1ccccc1	0.599097
32.917	33.0481	Train	385.15	CCCC=CC(C)C	0.131126
32.917	33.0481	Train	385.15	CCCC=CC(C)C	0.13112
34.169	34.2887	Train	395.69	CCCC=CCCC	0.119662
33.72	34.2636	Train	395.41	CCCC=CCCC	0.543626
31.79	31.4965	Train	347.95	CCCC=O	0.293485
25.99	26.4817	Train	309.22	CCCCC	0.491657
38.045	37.8616	Train	420.55	CCCCC(=O)CC	0.183412
48.54	48.0251	Train	458.65	CCCCC(=O)O	0.514922
39.154	39.2457	Train	451.45	CCCCC(C(C)C)C(C)C	0.09166
40.833	41.299	Train	468.15	CCCCC(C(C)C)C(C)CC	0.465996
41.406	41.5363	Train	474.15	CCCCC(C)(C(C)C)C(C)C	0.13031
38.203	39.1897	Train	453.15	CCCCC(C)(C)C(C)(C)C	0.98675
41.502	42.1332	Train	475.15	CCCCC(C)(C)C(C)(C)CC	0.631232
37.2	37.1472	Train	433.36	CCCCC(C)(C)C(C)C	0.052753
40.928	41.0131	Train	469.15	CCCCC(C)(C)C(C)C(C)C	0.085084
39.011	39.4771	Train	454.15	CCCCC(C)(C)C(C)CC	0.466074
40.546	40.8172	Train	465.15	CCCCC(C)(C)CC(C)(C)C	0.2712
38.111	38.3743	Train	444.15	CCCCC(C)(C)CC(C)C	0.263325
40.451	40.7187	Train	464.15	CCCCC(C)(C)CC(C)CC	0.267704
37.24	37.0817	Train	430.66	CCCCC(C)(C)CCC	0.15828
40.355	40.4251	Train	463.15	CCCCC(C)(C)CCC(C)C	0.070144
43.748	44.8179	Train	445.65	CCCCC(C)(C)CO	1.06988
41.31	41.7892	Train	473.15	CCCCC(C)(CC)C(C)(C)C	0.479223
38.921	39.33	Train	453.15	CCCCC(C)(CC)C(C)C	0.409025
37.53	37.7447	Train	436.96	CCCCC(C)(CC)CC	0.214698
40.451	40.7518	Train	464.15	CCCCC(C)(CC)CC(C)C	0.30082
39.27	39.5694	Train	453.15	CCCCC(C)(CC)CCC	0.299397
41.119	41.5431	Train	471.15	CCCCC(C)(CC)CCCC	0.42413
40.833	41.2032	Train	468.15	CCCCC(C)(CCC)CCC	0.37017
43.749	44.6328	Train	447.15	CCCCC(C)(O)C(C)C	0.88381
42.572	43.5132	Train	434.15	CCCCC(C)(O)CC	0.9412
48.058	49.4537	Train	482	CCCCC(C)(O)CCCC	1.39573
56.686	56.2194	Train	494.25	CCCCC(C)(O)CO	0.466586
36.62	35.9075	Train	400.85	CCCCC(C)=O	0.71253
31.17	31.1775	Train	363.2	CCCCC(C)C	0.00747
41.406	41.5462	Train	474.15	CCCCC(C)C(C)(C)C(C)C	0.140227
41.119	41.4505	Train	471.15	CCCCC(C)C(C)(C)CCC	0.331462
44.55	44.777	Train	455	CCCCC(C)C(C)(C)O	0.227008
36.11	35.6161	Train	413.66	CCCCC(C)C(C)C	0.493934
40.833	40.9811	Train	468.15	CCCCC(C)C(C)C(C)(C)C	0.14809
39.309	39.3529	Train	453.15	CCCCC(C)C(C)C(C)C	0.043943
38.03	37.7035	Train	436.56	CCCCC(C)C(C)CC	0.326494
40.833	41.248	Train	468.15	CCCCC(C)C(C)CC(C)C	0.41498
41.406	41.9058	Train	474.15	CCCCC(C)C(C)CCCC	0.499796
43.571	43.6336	Train	439.25	CCCCC(C)C(C)O	0.0626
41.024	41.6667	Train	470.15	CCCCC(C)C(CC)C(C)C	0.642748
39.939	40.054	Train	456.15	CCCCC(C)C(CC)CC	0.114978
45.898	46.0331	Train	459	CCCCC(C)C(O)CC	0.135096
48.574	49.2447	Train	482	CCCCC(C)C(O)CCC	0.670724
34.04	33.8393	Train	392.08	CCCCC(C)CC	0.200706
40.355	40.6399	Train	463.15	CCCCC(C)CC(C)(C)CC	0.28485
47.908	48.0832	Train	485	CCCCC(C)CC(C)(C)O	0.17523
37.82	37.0846	Train	429.06	CCCCC(C)CC(C)C	0.73543
40.928	41.3047	Train	469.15	CCCCC(C)CC(C)C(C)C	0.376665
39.664	39.6389	Train	453.15	CCCCC(C)CC(C)CC	0.025115
41.119	41.8237	Train	471.15	CCCCC(C)CC(C)CCC	0.704746
41.215	41.8371	Train	472.15	CCCCC(C)CC(CC)CC	0.62206
48.574	48.6771	Train	482	CCCCC(C)CC(O)CC	0.103094
36.19	36.0219	Train	415.59	CCCCC(C)CCC	0.16812
39.573	39.1855	Train	452.15	CCCCC(C)CCC(C)C	0.387472
41.406	41.8017	Train	474.15	CCCCC(C)CCC(C)CC	0.39569
49.099	48.1709	Train	487	CCCCC(C)CCC(C)O	0.928144
37.98	38.1608	Train	438.3	CCCCC(C)CCCC	0.180847
49.568	49.5416	Train	487	CCCCC(C)CCCCO	0.02644
47.821	47.7671	Train	473	CCCCC(C)CCCO	0.053876
46.084	46.3243	Train	459.15	CCCCC(C)CCO	0.240257
42.77	42.1527	Train	413.04	CCCCC(C)O	0.617305
51.636	52.6707	Train	580.15	CCCCC(C1CCCCC1)C1CCCCC1	1.03467
40.65	39.9778	Train	433.8	CCCCC(C=O)CC	0.672224
40.355	40.667	Train	463.15	CCCCC(CC(C)C)C(C)C	0.312007
41.597	42.3016	Train	476.15	CCCCC(CC)(CC)C(C)C	0.704598
39.897	40.4028	Train	460.05	CCCCC(CC)(CC)CC	0.505786
41.31	42.1245	Train	473.15	CCCCC(CC)(CC)CCC	0.814527
38.561	38.9258	Train	449.15	CCCCC(CC)C(C)(C)C	0.364762
41.119	41.8463	Train	471.15	CCCCC(CC)C(C)(C)CC	0.727348
37.74	37.5659	Train	434.36	CCCCC(CC)C(C)C	0.174105
41.024	41.4499	Train	470.15	CCCCC(CC)C(C)C(C)C	0.425944
39.848	39.9141	Train	455.15	CCCCC(CC)C(C)CC	0.06613
46.21	46.6342	Train	462	CCCCC(CC)C(C)O	0.42423
45.481	45.5535	Train	455	CCCCC(CC)C(C)O	0.072482
41.215	42.4116	Train	472.15	CCCCC(CC)C(CC)CC	1.19659
36.11	36.1191	Train	416.35	CCCCC(CC)CC	0.00905
40.069	40.2747	Train	460.15	CCCCC(CC)CC(C)(C)C	0.205704
39.298	39.0457	Train	449.15	CCCCC(CC)CC(C)C	0.2523
40.833	41.3314	Train	468.15	CCCCC(CC)CC(C)CC	0.498352
38.91	38.0387	Train	436.8	CCCCC(CC)CCC	0.871338
40.928	41.0979	Train	469.15	CCCCC(CC)CCC(C)C	0.16989
40.025	39.6337	Train	453.15	CCCCC(CC)CCCC	0.391287
48.574	49.0427	Train	480.15	CCCCC(CC)CCO	0.468732
48.68	47.4647	Train	457.75	CCCCC(CC)CO	1.21535
40.451	40.6835	Train	464.15	CCCCC(CCC)C(C)(C)C	0.232453
39.481	39.2531	Train	451.15	CCCCC(CCC)C(C)C	0.22786
41.024	41.689	Train	470.15	CCCCC(CCC)C(C)CC	0.66498
40.451	40.8108	Train	464.15	CCCCC(CCC)CC(C)C	0.35984
40.025	39.6026	Train	453.15	CCCCC(CCC)CCC	0.422404
41.024	41.2665	Train	470.15	CCCCC(CCC)CCCC	0.24246
41.119	41.4836	Train	471.15	CCCCC(CCCC)C(C)C	0.364635
49.24	48.7797	Train	488.35	CCCCC(CCO)C(C)C	0.46031
46.664	48.2786	Train	462	CCCCC(CO)CCC	1.6146
45.969	46.5981	Train	466.15	CCCCC(O)(CC)C(C)C	0.62913
45.024	45.8492	Train	455.35	CCCCC(O)(CC)CC	0.825213
46.397	47.1167	Train	466	CCCCC(O)(CC)CCC	0.719684
73.49	69.4961	Train	576	CCCCC(O)C(=O)O	3.99391
44.142	44.8806	Train	451	CCCCC(O)C(C)(C)C	0.738554
43.726	44.7027	Train	440.75	CCCCC(O)C(C)C	0.97666
42.754	44.1137	Train	429.85	CCCCC(O)CC	1.35968
45.661	46.0929	Train	463.15	CCCCC(O)CC(C)(C)C	0.431945
48.574	49.7658	Train	482	CCCCC(O)CC(C)CC	1.19182
45.102	46.7449	Train	449.75	CCCCC(O)CCC	1.6429
48.574	49.4881	Train	482	CCCCC(O)CCC(C)C	0.914102
47.321	49.6708	Train	468.25	CCCCC(O)CCCC	2.34981
65.749	65.5271	Train	557.15	CCCCC(O)CCCO	0.22193
61.289	60.5574	Train	522.15	CCCCC(O)CCO	0.73158
58.02	58.0072	Train	497.15	CCCCC(O)CO	0.01285
51.723	52.4143	Train	581.04	CCCCC(c1ccccc1)c1ccccc1	0.691314
69	65.3526	Train	628	CCCCC/C=C\C/C=C\CCCCCCCC(=O)O	3.64742
37.217	37.5429	Train	429.15	CCCCC1=CCCC1	0.32587
36.36	37.4516	Train	429.76	CCCCC1CCCC1	1.09161
48.348	48.6077	Train	546.28	CCCCC1CCCc2ccccc21	0.25971
48.868	49.0149	Train	551.65	CCCCC1CCc2ccccc2C1	0.14694
33.91	34.1663	Train	395.75	CCCCC=C(C)C	0.256317
53.078	53.5732	Train	594.95	CCCCC=C(c1ccccc1)c1ccccc1	0.495174
34.48	34.8785	Train	376.15	CCCCC=O	0.39845
29.11	29.6079	Train	341.88	CCCCCC	0.49791
40.928	41.2553	Train	469.15	CCCCCC(C(C)C)C(C)C	0.32731
35.04	34.8371	Train	405.84	CCCCCC(C)(C)C	0.202888
39.101	39.3143	Train	455.15	CCCCCC(C)(C)C(C)C	0.21335
40.355	40.5118	Train	463.15	CCCCCC(C)(C)CC(C)C	0.15683
46.034	46.7671	Train	465.15	CCCCCC(C)(C)CO	0.73306
42.132	42.8664	Train	429.85	CCCCCC(C)(C)O	0.7344
39.788	40.1506	Train	458.85	CCCCCC(C)(CC)CC	0.36261
41.215	41.6291	Train	472.15	CCCCCC(C)(CC)CCC	0.414097
45.569	46.2185	Train	462.25	CCCCCC(C)(O)C(C)C	0.64946
45.725	46.5862	Train	462.15	CCCCCC(C)(O)CC	0.86115
48.058	49.0866	Train	482	CCCCCC(C)(O)CCC	1.02863
38.62	38.1907	Train	424.05	CCCCCC(C)=O	0.429258
33.44	33.8097	Train	390.8	CCCCCC(C)C	0.36972
38.831	39.0265	Train	452.15	CCCCCC(C)C(C)(C)C	0.195463
41.502	41.931	Train	475.15	CCCCCC(C)C(C)(C)CC	0.428977
38.2	37.8891	Train	437.47	CCCCCC(C)C(C)C	0.310916
41.31	41.6061	Train	473.15	CCCCCC(C)C(C)C(C)C	0.296113
40.123	39.9911	Train	458.15	CCCCCC(C)C(C)CC	0.131934
41.502	42.0141	Train	475.15	CCCCCC(C)C(C)CCC	0.5121
45.377	44.9819	Train	454	CCCCCC(C)C(C)O	0.395078
41.31	41.9895	Train	473.15	CCCCCC(C)C(CC)CC	0.67954
36.4	36.26	Train	417.38	CCCCCC(C)CC	0.139994
40.451	40.6494	Train	464.15	CCCCCC(C)CC(C)(C)C	0.198426
39.481	39.2027	Train	451.15	CCCCCC(C)CC(C)C	0.278264
38.51	38.2371	Train	438.85	CCCCCC(C)CCC	0.272924
41.119	41.2401	Train	471.15	CCCCCC(C)CCC(C)C	0.12112
40.58	40.1319	Train	459.15	CCCCCC(C)CCCC	0.44808
49.568	48.9228	Train	487	CCCCCC(C)CCCO	0.645183
47.821	47.4532	Train	473	CCCCCC(C)CCO	0.36777
52.902	54.5049	Train	593.15	CCCCCC(C1CCCCC1)C1CCCCC1	1.60288
40.928	41.1415	Train	469.15	CCCCCC(CC)C(C)(C)C	0.21354
39.848	39.6024	Train	455.15	CCCCCC(CC)C(C)C	0.245602
41.406	42.057	Train	474.15	CCCCCC(CC)C(C)CC	0.651034
39.24	38.3833	Train	439.66	CCCCCC(CC)CC	0.85666
41.119	41.4583	Train	471.15	CCCCCC(CC)CC(C)C	0.339252
40.395	40.0052	Train	457.15	CCCCCC(CC)CCC	0.389827
41.502	41.7637	Train	475.15	CCCCCC(CC)CCCC	0.261702
49.039	48.6586	Train	482	CCCCCC(CC)CCO	0.38037
41.119	41.463	Train	471.15	CCCCCC(CCC)C(C)C	0.343967
41.215	41.4026	Train	472.15	CCCCCC(CCC)CCC	0.187557
47.035	47.7267	Train	472.15	CCCCCC(O)(CC)CC	0.691692
46.057	46.8536	Train	467	CCCCCC(O)C(C)(C)C	0.796596
44.904	45.9026	Train	447.85	CCCCCC(O)CC	0.99863
48.208	50.0122	Train	474.15	CCCCCC(O)CCCC	1.8042
67.581	66.834	Train	571.15	CCCCCC(O)CCCO	0.74697
63.185	61.8458	Train	536.15	CCCCCC(O)CCO	1.33915
59.952	59.1219	Train	511.15	CCCCCC(O)CO	0.830136
53.003	53.5989	Train	594.18	CCCCCC(c1ccccc1)c1ccccc1	0.595892
39.555	39.7171	Train	452.15	CCCCCC1=CCCC1	0.162094
38.95	39.711	Train	453.76	CCCCCC1CCCC1	0.760964
40.84	41.7824	Train	476.87	CCCCCC1CCCCC1	0.94244
49.948	50.0886	Train	562.78	CCCCCC1CCCc2ccccc21	0.1406
50.469	50.6053	Train	568.15	CCCCCC1CCc2ccccc2C1	0.136324
54.855	55.1805	Train	613.15	CCCCCC=C(c1ccccc1)c1ccccc1	0.325496
31.73	32.5709	Train	371.58	CCCCCCC	0.840877
37.15	37.2618	Train	430.05	CCCCCCC(C)(C)C	0.111833
41.502	41.5124	Train	475.15	CCCCCCC(C)(C)C(C)C	0.010436
39.452	39.5632	Train	455.15	CCCCCCC(C)(C)CC	0.111164
41.215	41.4572	Train	472.15	CCCCCCC(C)(C)CCC	0.242214
47.97	48.1528	Train	481.15	CCCCCCC(C)(C)CO	0.18282
44.592	45.4911	Train	451.15	CCCCCCC(C)(C)O	0.89905
41.693	42.1396	Train	477.15	CCCCCCC(C)(CC)CC	0.446603
36.43	36.3748	Train	416.43	CCCCCCC(C)C	0.055248
41.31	41.356	Train	473.15	CCCCCCC(C)C(C)(C)C	0.046003
49.099	48.3216	Train	487	CCCCCCC(C)C(C)O	0.777417
41.31	41.6215	Train	473.15	CCCCCCC(C)CC(C)C	0.311494
40.756	40.4199	Train	461.05	CCCCCCC(C)CCC	0.336063
41.884	42.1711	Train	479.15	CCCCCCC(C)CCCC	0.28715
47.821	47.9289	Train	473	CCCCCCC(C)CO	0.10788
41.693	41.9114	Train	477.15	CCCCCCC(CC)CCC	0.218354
49.039	49.5475	Train	482	CCCCCCC(CC)CO	0.508523
48.527	49.9712	Train	481.55	CCCCCCC(O)C(C)C	1.44416
47.279	48.4017	Train	467.85	CCCCCCC(O)CC	1.12271
49.16	50.8025	Train	483.15	CCCCCCC(O)CCC	1.64247
69.306	68.4834	Train	585.15	CCCCCCC(O)CCCO	0.82261
65.01	63.5719	Train	550.15	CCCCCCC(O)CCO	1.4381
61.843	60.8415	Train	525.15	CCCCCCC(O)CO	1.0015
54.269	54.7827	Train	607.15	CCCCCCC(c1ccccc1)c1ccccc1	0.513715
41.747	41.7508	Train	473.15	CCCCCCC1=CCCC1	0.00378
41.17	41.8739	Train	476.26	CCCCCCC1CCCC1	0.70393
42.84	43.7959	Train	497.86	CCCCCCC1CCCCC1	0.95593
51.441	51.7832	Train	578.15	CCCCCCC1CCCc2ccccc21	0.342226
51.928	52.8693	Train	583.15	CCCCCCC1CCc2ccccc2C1	0.941286
56.421	56.8015	Train	629.15	CCCCCCC=C(c1ccccc1)c1ccccc1	0.38055
38.8	40.4528	Train	425.95	CCCCCCC=O	1.65282
34.77	35.2773	Train	398.83	CCCCCCCC	0.507298
56.31	56.9094	Train	513.05	CCCCCCCC(=O)O	0.59941
39.27	39.6216	Train	453.15	CCCCCCCC(C)(C)C	0.351574
41.597	41.6857	Train	476.15	CCCCCCCC(C)(C)CC	0.088677
48.577	49.379	Train	487	CCCCCCCC(C)(C)O	0.801967
38.14	38.7041	Train	440.15	CCCCCCCC(C)C	0.564082
41.884	42.0081	Train	479.15	CCCCCCCC(C)C(C)C	0.12412
42.843	43.1281	Train	489.15	CCCCCCCC(C)CC(C)C	0.285063
42.172	42.4605	Train	482.15	CCCCCCCC(C)CCC	0.288495
50.432	49.9677	Train	495.15	CCCCCCCC(C)CO	0.464272
51.58	47.8704	Train	471.65	CCCCCCCC(C)O	3.70956
42.143	42.5014	Train	481.85	CCCCCCCC(CC)CC	0.35835
49.145	49.6724	Train	483	CCCCCCCC(O)CC	0.527424
66.733	64.689	Train	564.15	CCCCCCCC(O)CCO	2.04395
63.665	61.6622	Train	539.15	CCCCCCCC(O)CO	2.0028
55.442	55.9074	Train	619.15	CCCCCCCC(c1ccccc1)c1ccccc1	0.465356
43.13	43.7056	Train	492.15	CCCCCCCC1=CCCC1	0.575574
43.35	43.9289	Train	497.3	CCCCCCCC1CCCC1	0.5789
44.89	45.7629	Train	518.06	CCCCCCCC1CCCCC1	0.8729
53	54.0423	Train	594.15	CCCCCCCC1CCCc2ccccc21	1.04229
53.39	54.7409	Train	598.15	CCCCCCCC1CCc2ccccc2C1	1.35094
57.696	58.4087	Train	642.15	CCCCCCCC=C(c1ccccc1)c1ccccc1	0.712653
37.15	37.8733	Train	423.97	CCCCCCCCC	0.723344
57.71	58.2739	Train	528.75	CCCCCCCCC(=O)O	0.563903
44.867	44.4687	Train	483.35	CCCCCCCCC(C)=O	0.39829
40.875	40.9817	Train	462.34	CCCCCCCCC(C)C	0.106697
43.995	44.2112	Train	501.15	CCCCCCCCC(C)C(C)C	0.216197
42.268	42.7891	Train	483.15	CCCCCCCCC(C)CC	0.52111
44.572	44.7458	Train	507.15	CCCCCCCCC(C)CC(C)C	0.17378
45.164	48.8955	Train	490.15	CCCCCCCCC(C)O	3.73154
56.421	58.7777	Train	629.15	CCCCCCCCC(C1CCCCC1)C1CCCCC1	2.35674
68.32	64.4932	Train	578.15	CCCCCCCCC(O)CCO	3.82678
65.387	60.9929	Train	553.15	CCCCCCCCC(O)CO	4.39409
56.519	56.9593	Train	630.15	CCCCCCCCC(c1ccccc1)c1ccccc1	0.4403
44.86	45.4863	Train	510.15	CCCCCCCCC1=CCCC1	0.626313
46.82	47.6298	Train	536.76	CCCCCCCCC1CCCCC1	0.809814
54.366	55.5304	Train	608.15	CCCCCCCCC1CCCc2ccccc21	1.16435
54.757	56.1666	Train	612.15	CCCCCCCCC1CCc2ccccc2C1	1.40961
44.25	44.6293	Train	468.15	CCCCCCCCC=O	0.379307
40.02	40.1971	Train	447.3	CCCCCCCCCC	0.17709
61.46	58.5824	Train	543.15	CCCCCCCCCC(=O)O	2.87763
43.322	43.6563	Train	494.15	CCCCCCCCCC(C)(C)C	0.334307
45.875	46.1295	Train	500.98	CCCCCCCCCC(C)=O	0.25451
42.268	43.0028	Train	483.15	CCCCCCCCCC(C)C	0.73483
44.216	44.6395	Train	503.45	CCCCCCCCCC(C)CC	0.42352
46.209	46.304	Train	524.15	CCCCCCCCCC(C)CC(C)C	0.095016
47.054	49.8661	Train	508.15	CCCCCCCCCC(C)O	2.81206
57.5	59.0991	Train	640.15	CCCCCCCCCC(C1CCCCC1)C1CCCCC1	1.59909
52.805	63.73	Train	592.15	CCCCCCCCCC(O)CCO	10.925
66.975	60.0533	Train	567.15	CCCCCCCCCC(O)CO	6.92173
56.911	57.2688	Train	634.15	CCCCCCCCCC(c1ccccc1)c1ccccc1	0.357818
47.24	47.6758	Train	535.26	CCCCCCCCCC1CCCC1	0.43579
48.62	49.3613	Train	554.66	CCCCCCCCCC1CCCCC1	0.74133
55.638	56.2396	Train	621.15	CCCCCCCCCC1CCCc2ccccc21	0.601555
55.931	56.7669	Train	624.15	CCCCCCCCCC1CCc2ccccc2C1	0.835876
60.056	59.8228	Train	666.15	CCCCCCCCCC=C(c1ccccc1)c1ccccc1	0.233216
42.52	41.7975	Train	469.08	CCCCCCCCCCC	0.722507
56.576	56.4826	Train	557.35	CCCCCCCCCCC(=O)O	0.093357
45.149	45.4128	Train	513.15	CCCCCCCCCCC(C)(C)C	0.263804
45.795	47.6257	Train	519.85	CCCCCCCCCCC(C)=O	1.83075
44.139	44.63	Train	502.65	CCCCCCCCCCC(C)C	0.491005
47.561	47.5876	Train	538.15	CCCCCCCCCCC(C)C(C)C	0.02664
45.987	46.3162	Train	521.85	CCCCCCCCCCC(C)CC	0.3292
47.658	47.6543	Train	539.15	CCCCCCCCCCC(C)CC(C)C	0.003737
46.306	48.2801	Train	525.15	CCCCCCCCCCC(C)O	1.97409
58.482	58.4583	Train	650.15	CCCCCCCCCCC(C1CCCCC1)C1CCCCC1	0.023656
54.171	57.841	Train	606.15	CCCCCCCCCCC(O)CCO	3.67003
51.733	54.6728	Train	581.15	CCCCCCCCCCC(O)CO	2.93983
58.482	58.6795	Train	650.15	CCCCCCCCCCC(c1ccccc1)c1ccccc1	0.19747
47.948	48.4886	Train	542.15	CCCCCCCCCCC1=CCCC1	0.540586
49	49.1538	Train	552.54	CCCCCCCCCCC1CCCC1	0.153767
50.37	50.7296	Train	570.75	CCCCCCCCCCC1CCCCC1	0.35959
57.107	56.7374	Train	636.15	CCCCCCCCCCC1CCc2ccccc2C1	0.369573
61.14	60.8646	Train	677.15	CCCCCCCCCCC=C(c1ccccc1)c1ccccc1	0.2754
48.17	47.537	Train	506.15	CCCCCCCCCCC=O	0.633036
44.34	43.8934	Train	489.47	CCCCCCCCCCCC	0.446552
62.19	57.1132	Train	571.85	CCCCCCCCCCCC(=O)O	5.07681
51.92	51.5707	Train	540	CCCCCCCCCCCC(=O)OC	0.349314
46.788	47.1728	Train	530.15	CCCCCCCCCCCC(C)(C)C	0.38485
47.328	49.1359	Train	535.73	CCCCCCCCCCCC(C)=O	1.80789
49.207	49.2912	Train	555.15	CCCCCCCCCCCC(C)C(C)C	0.08423
47.687	48.1152	Train	539.45	CCCCCCCCCCCC(C)CC	0.42817
49.111	49.1667	Train	554.15	CCCCCCCCCCCC(C)CC(C)C	0.055733
47.852	49.7275	Train	541.15	CCCCCCCCCCCC(C)O	1.87553
59.465	58.9784	Train	660.15	CCCCCCCCCCCC(C1CCCCC1)C1CCCCC1	0.48663
58.973	62.7601	Train	655.15	CCCCCCCCCCCC(O)CCCO	3.78706
55.54	57.7424	Train	620.15	CCCCCCCCCCCC(O)CCO	2.20237
53.097	54.7013	Train	595.15	CCCCCCCCCCCC(O)CO	1.60428
59.367	59.5773	Train	659.15	CCCCCCCCCCCC(c1ccccc1)c1ccccc1	0.21033
49.401	50.0229	Train	557.15	CCCCCCCCCCCC1=CCCC1	0.621903
50.88	50.8072	Train	568.76	CCCCCCCCCCCC1CCCC1	0.072844
52.05	52.3061	Train	586.26	CCCCCCCCCCCC1CCCCC1	0.25606
62.126	61.8481	Train	687.15	CCCCCCCCCCCC=C(c1ccccc1)c1ccccc1	0.277855
50.35	49.0996	Train	523.15	CCCCCCCCCCCC=O	1.25037
45.79	45.845	Train	508.62	CCCCCCCCCCCCC	0.05498
52.132	58.0822	Train	585.25	CCCCCCCCCCCCC(=O)O	5.95022
48.432	48.8807	Train	547.15	CCCCCCCCCCCCC(C)(C)C	0.448657
48.82	50.6213	Train	551.15	CCCCCCCCCCCCC(C)=O	1.80135
47.581	48.2887	Train	538.35	CCCCCCCCCCCCC(C)C	0.707685
49.207	49.6958	Train	555.15	CCCCCCCCCCCCC(C)CC	0.488763
50.469	50.5729	Train	568.15	CCCCCCCCCCCCC(C)CC(C)C	0.10392
49.401	51.1731	Train	557.15	CCCCCCCCCCCCC(C)O	1.77208
60.45	59.6421	Train	670.15	CCCCCCCCCCCCC(C1CCCCC1)C1CCCCC1	0.807887
60.351	62.8042	Train	669.15	CCCCCCCCCCCCC(O)CCCO	2.45316
56.911	58.0003	Train	634.15	CCCCCCCCCCCCC(O)CCO	1.08926
54.464	55.5713	Train	609.15	CCCCCCCCCCCCC(O)CO	1.10727
50.761	51.4451	Train	571.15	CCCCCCCCCCCCC1=CCCC1	0.684107
52.59	52.357	Train	584.06	CCCCCCCCCCCCC1CCCC1	0.232998
53.56	53.7853	Train	600.86	CCCCCCCCCCCCC1CCCCC1	0.225343
63.015	62.7412	Train	696.15	CCCCCCCCCCCCC=C(c1ccccc1)c1ccccc1	0.27376
51.88	50.6668	Train	540.15	CCCCCCCCCCCCC=O	1.21316
47.79	47.6725	Train	526.73	CCCCCCCCCCCCCC	0.11752
63.94	59.1317	Train	599.35	CCCCCCCCCCCCCC(=O)O	4.80829
49.984	50.4639	Train	563.15	CCCCCCCCCCCCCC(C)(C)C	0.479856
50.178	51.9612	Train	565.15	CCCCCCCCCCCCCC(C)=O	1.7832
49.169	49.9273	Train	554.75	CCCCCCCCCCCCCC(C)C	0.758338
52.22	52.3619	Train	586.15	CCCCCCCCCCCCCC(C)C(C)C	0.141885
51.733	51.8761	Train	581.15	CCCCCCCCCCCCCC(C)CC(C)C	0.14307
61.337	60.0805	Train	679.15	CCCCCCCCCCCCCC(C1CCCCC1)C1CCCCC1	1.25653
61.732	63.2588	Train	683.15	CCCCCCCCCCCCCC(O)CCCO	1.52678
58.285	58.7548	Train	648.15	CCCCCCCCCCCCCC(O)CCO	0.46977
55.834	57.0566	Train	623.15	CCCCCCCCCCCCCC(O)CO	1.22261
61.041	61.2711	Train	676.15	CCCCCCCCCCCCCC(c1ccccc1)c1ccccc1	0.230095
52.025	52.7587	Train	584.15	CCCCCCCCCCCCCC1=CCCC1	0.733705
63.905	63.628	Train	705.15	CCCCCCCCCCCCCC=C(c1ccccc1)c1ccccc1	0.277047
49.304	52.131	Train	556.15	CCCCCCCCCCCCCC=O	2.82703
63.17	60.0729	Train	612.05	CCCCCCCCCCCCCCC(=O)O	3.09706
51.441	51.939	Train	578.15	CCCCCCCCCCCCCCC(C)(C)C	0.497972
50.663	51.4413	Train	570.15	CCCCCCCCCCCCCCC(C)C	0.77833
52.22	52.74	Train	586.15	CCCCCCCCCCCCCCC(C)CC	0.52005
53	53.1623	Train	594.15	CCCCCCCCCCCCCCC(C)CC(C)C	0.16232
52.317	53.8425	Train	587.15	CCCCCCCCCCCCCCC(C)O	1.52554
62.225	60.9186	Train	688.15	CCCCCCCCCCCCCCC(C1CCCCC1)C1CCCCC1	1.30636
59.662	59.7855	Train	662.15	CCCCCCCCCCCCCCC(O)CCO	0.123503
57.206	58.6667	Train	637.15	CCCCCCCCCCCCCCC(O)CO	1.46072
61.83	62.0621	Train	684.15	CCCCCCCCCCCCCCC(c1ccccc1)c1ccccc1	0.23214
55.98	55.1753	Train	612.16	CCCCCCCCCCCCCCC1CCCC1	0.80466
64.697	64.422	Train	713.15	CCCCCCCCCCCCCCC=C(c1ccccc1)c1ccccc1	0.27504
65.61	60.9742	Train	624.15	CCCCCCCCCCCCCCCC(=O)O	4.63575
52.805	54.5165	Train	592.15	CCCCCCCCCCCCCCCC(C)=O	1.71153
52.123	52.8996	Train	585.15	CCCCCCCCCCCCCCCC(C)C	0.77663
54.953	55.1076	Train	614.15	CCCCCCCCCCCCCCCC(C)C(C)C	0.15465
53.585	54.1077	Train	600.15	CCCCCCCCCCCCCCCC(C)CC	0.522704
53.683	55.0946	Train	601.15	CCCCCCCCCCCCCCCC(C)O	1.41157
63.114	61.8342	Train	697.15	CCCCCCCCCCCCCCCC(C1CCCCC1)C1CCCCC1	1.27976
64.499	64.655	Train	711.15	CCCCCCCCCCCCCCCC(O)CCCO	0.15602
58.58	60.0375	Train	651.15	CCCCCCCCCCCCCCCC(O)CO	1.45745
62.521	62.7596	Train	691.15	CCCCCCCCCCCCCCCC(c1ccccc1)c1ccccc1	0.23863
54.366	55.1596	Train	608.15	CCCCCCCCCCCCCCCC1=CCCC1	0.793615
57.66	56.4538	Train	625	CCCCCCCCCCCCCCCC1CCCC1	1.20623
57.99	57.7255	Train	640.16	CCCCCCCCCCCCCCCC1CCCCC1	0.264548
52.48	52.4456	Train	575.3	CCCCCCCCCCCCCCCCC	0.034405
57.068	61.8528	Train	635.75	CCCCCCCCCCCCCCCCC(=O)O	4.78484
54.171	54.6676	Train	606.15	CCCCCCCCCCCCCCCCC(C)(C)C	0.49661
54.171	55.8219	Train	606.15	CCCCCCCCCCCCCCCCC(C)=O	1.65095
53.487	54.2571	Train	599.15	CCCCCCCCCCCCCCCCC(C)C	0.770095
54.855	55.3752	Train	613.15	CCCCCCCCCCCCCCCCC(C)CC	0.52023
65.887	65.5649	Train	725.15	CCCCCCCCCCCCCCCCC(O)CCCO	0.322074
62.423	62.3874	Train	690.15	CCCCCCCCCCCCCCCCC(O)CCO	0.035564
59.957	61.2454	Train	665.15	CCCCCCCCCCCCCCCCC(O)CO	1.2884
55.442	56.253	Train	619.15	CCCCCCCCCCCCCCCCC1=CCCC1	0.810953
59.33	57.6584	Train	637.16	CCCCCCCCCCCCCCCCC1CCCC1	1.6716
59.33	58.9152	Train	652.16	CCCCCCCCCCCCCCCCC1CCCCC1	0.414846
65.69	62.8312	Train	648.35	CCCCCCCCCCCCCCCCCC(=O)O	2.85878
58.35	58.7802	Train	623.15	CCCCCCCCCCCCCCCCCC(=O)OCCCC	0.430224
55.148	56.7765	Train	616.15	CCCCCCCCCCCCCCCCCC(C)=O	1.6285
54.757	55.5175	Train	612.15	CCCCCCCCCCCCCCCCCC(C)C	0.760517
56.225	57.4348	Train	627.15	CCCCCCCCCCCCCCCCCC(C)O	1.20976
63.806	63.7717	Train	704.15	CCCCCCCCCCCCCCCCCC(O)CCO	0.034256
61.337	62.4574	Train	679.15	CCCCCCCCCCCCCCCCCC(O)CO	1.12039
58.482	58.9254	Train	650.15	CCCCCCCCCCCCCCCCCC1CCCC1	0.443354
59.859	60.0901	Train	664.15	CCCCCCCCCCCCCCCCCC1CCCCC1	0.231103
54.562	57.04	Train	610.15	CCCCCCCCCCCCCCCCCC=O	2.47803
56.07	55.1154	Train	603.05	CCCCCCCCCCCCCCCCCCC	0.95458
65.89	63.6702	Train	659.15	CCCCCCCCCCCCCCCCCCC(=O)O	2.21977
56.015	57.6259	Train	625	CCCCCCCCCCCCCCCCCCC(C)=O	1.61086
57.402	58.5215	Train	639.15	CCCCCCCCCCCCCCCCCCC(C)O	1.11953
62.719	63.6731	Train	693.15	CCCCCCCCCCCCCCCCCCC(O)CO	0.95408
59.662	60.0934	Train	662.15	CCCCCCCCCCCCCCCCCCC1CCCC1	0.43139
55.834	58.2159	Train	623.15	CCCCCCCCCCCCCCCCCCC=O	2.38194
60.745	61.1653	Train	673.15	CCCCCCCCCCCCCCCCCCCC1CCCC1	0.420268
61.929	62.1504	Train	685.15	CCCCCCCCCCCCCCCCCCCC1CCCCC1	0.221368
56.911	59.2169	Train	634.15	CCCCCCCCCCCCCCCCCCCC=O	2.30587
56.47	57.6477	Train	629.65	CCCCCCCCCCCCCCCCCCCCC	1.17772
61.732	62.1403	Train	683.15	CCCCCCCCCCCCCCCCCCCCC1CCCC1	0.408327
62.917	63.1224	Train	695.15	CCCCCCCCCCCCCCCCCCCCC1CCCCC1	0.20539
62.719	63.1065	Train	693.15	CCCCCCCCCCCCCCCCCCCCCC1CCCC1	0.38747
63.905	64.0876	Train	705.15	CCCCCCCCCCCCCCCCCCCCCC1CCCCC1	0.18259
59.888	60.9461	Train	664.45	CCCCCCCCCCCCCCCCCCCCCCCC	1.05808
64.598	64.9309	Train	712.15	CCCCCCCCCCCCCCCCCCCCCCCC1CCCC1	0.332885
60.933	61.9451	Train	675.05	CCCCCCCCCCCCCCCCCCCCCCCCC	1.01208
66.482	66.591	Train	731.15	CCCCCCCCCCCCCCCCCCCCCCCCC1CCCCC1	0.10897
61.949	62.9139	Train	685.35	CCCCCCCCCCCCCCCCCCCCCCCCCC	0.96488
66.283	66.5555	Train	729.15	CCCCCCCCCCCCCCCCCCCCCCCCCC1CCCC1	0.2725
62.926	63.8444	Train	695.25	CCCCCCCCCCCCCCCCCCCCCCCCCCC	0.918353
67.077	67.3137	Train	737.15	CCCCCCCCCCCCCCCCCCCCCCCCCCC1CCCC1	0.23669
68.071	68.1096	Train	747.15	CCCCCCCCCCCCCCCCCCCCCCCCCCC1CCCCC1	0.0386
63.866	64.7368	Train	704.75	CCCCCCCCCCCCCCCCCCCCCCCCCCCC	0.87077
67.872	68.0654	Train	745.15	CCCCCCCCCCCCCCCCCCCCCCCCCCCC1CCCC1	0.19339
64.776	65.6001	Train	713.95	CCCCCCCCCCCCCCCCCCCCCCCCCCCCC	0.82412
68.668	68.8136	Train	753.15	CCCCCCCCCCCCCCCCCCCCCCCCCCCCC1CCCC1	0.14565
69.464	69.4443	Train	761.15	CCCCCCCCCCCCCCCCCCCCCCCCCCCCC1CCCCC1	0.01971
65.658	66.4349	Train	722.85	CCCCCCCCCCCCCCCCCCCCCCCCCCCCCC	0.77689
69.364	69.4738	Train	760.15	CCCCCCCCCCCCCCCCCCCCCCCCCCCCCC1CCCC1	0.10983
70.161	70.107	Train	768.15	CCCCCCCCCCCCCCCCCCCCCCCCCCCCCC1CCCCC1	0.05404
66.482	67.2079	Train	731.15	CCCCCCCCCCCCCCCCCCCCCCCCCCCCCCC	0.72592
70.062	70.1321	Train	767.15	CCCCCCCCCCCCCCCCCCCCCCCCCCCCCCC1CCCC1	0.07012
67.375	68.0298	Train	740.15	CCCCCCCCCCCCCCCCCCCCCCCCCCCCCCCC	0.65478
70.759	70.7855	Train	774.15	CCCCCCCCCCCCCCCCCCCCCCCCCCCCCCCC1CCCC1	0.02649
71.458	71.332	Train	781.15	CCCCCCCCCCCCCCCCCCCCCCCCCCCCCCCC1CCCCC1	0.12598
68.17	68.7636	Train	748.15	CCCCCCCCCCCCCCCCCCCCCCCCCCCCCCCCC	0.593565
71.358	71.3516	Train	780.15	CCCCCCCCCCCCCCCCCCCCCCCCCCCCCCCCC1CCCC1	0.00645
72.157	71.9851	Train	788.15	CCCCCCCCCCCCCCCCCCCCCCCCCCCCCCCCC1CCCCC1	0.17193
68.867	69.4104	Train	755.15	CCCCCCCCCCCCCCCCCCCCCCCCCCCCCCCCCC	0.54341
72.057	72.002	Train	787.15	CCCCCCCCCCCCCCCCCCCCCCCCCCCCCCCCCC1CCCC1	0.055
72.756	72.5508	Train	794.15	CCCCCCCCCCCCCCCCCCCCCCCCCCCCCCCCCC1CCCCC1	0.20523
69.663	70.142	Train	763.15	CCCCCCCCCCCCCCCCCCCCCCCCCCCCCCCCCCC	0.478975
72.656	72.5651	Train	793.15	CCCCCCCCCCCCCCCCCCCCCCCCCCCCCCCCCCC1CCCC1	0.09086
73.356	73.1148	Train	800.15	CCCCCCCCCCCCCCCCCCCCCCCCCCCCCCCCCCC1CCCCC1	0.24121
70.361	70.7839	Train	770.15	CCCCCCCCCCCCCCCCCCCCCCCCCCCCCCCCCCCC	0.42293
73.256	73.127	Train	799.15	CCCCCCCCCCCCCCCCCCCCCCCCCCCCCCCCCCCC1CCCC1	0.12899
74.056	73.7617	Train	807.15	CCCCCCCCCCCCCCCCCCCCCCCCCCCCCCCCCCCC1CCCCC1	0.2943
71.059	71.4216	Train	777.15	CCCCCCCCCCCCCCCCCCCCCCCCCCCCCCCCCCCCC	0.36256
73.856	73.6869	Train	805.15	CCCCCCCCCCCCCCCCCCCCCCCCCCCCCCCCCCCCC1CCCC1	0.16912
74.456	74.1499	Train	811.15	CCCCCCCCCCCCCCCCCCCCCCCCCCCCCCCCCCCCC1CCCCC1	0.30609
71.757	72.0586	Train	784.15	CCCCCCCCCCCCCCCCCCCCCCCCCCCCCCCCCCCCCC	0.30163
72.456	72.6952	Train	791.15	CCCCCCCCCCCCCCCCCCCCCCCCCCCCCCCCCCCCCCC	0.23918
73.156	73.3312	Train	798.15	CCCCCCCCCCCCCCCCCCCCCCCCCCCCCCCCCCCCCCCC	0.175245
83.506	82.8104	Train	901.15	CCCCCCCCCCCCCCCCCCCCCCCCCCCCCCCCCCCCCCCCCCCCCCCCCCCCCCCCCCCCCC	0.69561
83.809	83.0906	Train	904.15	CCCCCCCCCCCCCCCCCCCCCCCCCCCCCCCCCCCCCCCCCCCCCCCCCCCCCCCCCCCCCCC	0.7184
84.112	83.3705	Train	907.15	CCCCCCCCCCCCCCCCCCCCCCCCCCCCCCCCCCCCCCCCCCCCCCCCCCCCCCCCCCCCCCCC	0.741524
84.415	83.65	Train	910.15	CCCCCCCCCCCCCCCCCCCCCCCCCCCCCCCCCCCCCCCCCCCCCCCCCCCCCCCCCCCCCCCCC	0.76497
84.819	84.0148	Train	914.15	CCCCCCCCCCCCCCCCCCCCCCCCCCCCCCCCCCCCCCCCCCCCCCCCCCCCCCCCCCCCCCCCCC	0.80416
85.426	84.5695	Train	920.15	CCCCCCCCCCCCCCCCCCCCCCCCCCCCCCCCCCCCCCCCCCCCCCCCCCCCCCCCCCCCCCCCCCCC	0.85646
85.729	84.8464	Train	923.15	CCCCCCCCCCCCCCCCCCCCCCCCCCCCCCCCCCCCCCCCCCCCCCCCCCCCCCCCCCCCCCCCCCCCC	0.88257
86.033	85.1231	Train	926.15	CCCCCCCCCCCCCCCCCCCCCCCCCCCCCCCCCCCCCCCCCCCCCCCCCCCCCCCCCCCCCCCCCCCCCC	0.909854
73.956	74.245	Train	806.15	CCCCCCCCCCCCCCCCCCCCCCCCCCCCCCCCCCCCc1ccccc1	0.28897
73.456	73.7821	Train	801.15	CCCCCCCCCCCCCCCCCCCCCCCCCCCCCCCCCCCc1ccccc1	0.32608
72.256	72.6813	Train	789.15	CCCCCCCCCCCCCCCCCCCCCCCCCCCCCCCCCc1ccccc1	0.42528
71.657	72.1299	Train	783.15	CCCCCCCCCCCCCCCCCCCCCCCCCCCCCCCCc1ccccc1	0.472875
70.46	71.0246	Train	771.15	CCCCCCCCCCCCCCCCCCCCCCCCCCCCCCc1ccccc1	0.56458
69.066	69.7357	Train	757.15	CCCCCCCCCCCCCCCCCCCCCCCCCCCCc1ccccc1	0.66965
68.369	69.0866	Train	750.15	CCCCCCCCCCCCCCCCCCCCCCCCCCCc1ccccc1	0.71762
66.085	66.9545	Train	727.15	CCCCCCCCCCCCCCCCCCCCCCCCc1ccccc1	0.86952
65.292	66.2033	Train	719.15	CCCCCCCCCCCCCCCCCCCCCCCc1ccccc1	0.911285
64.499	65.4482	Train	711.15	CCCCCCCCCCCCCCCCCCCCCCc1ccccc1	0.94919
64.8	60.2252	Train	629.15	CCCCCCCCCCCCCCCCCCCCO	4.57484
74.015	72.1525	Train	806.74	CCCCCCCCCCCCCCCCCCCCOC(=O)CCC	1.86253
67.102	67.4091	Train	737.4	CCCCCCCCCCCCCCCCCCCCOC=O	0.30715
62.719	63.7526	Train	693.15	CCCCCCCCCCCCCCCCCCCCc1ccccc1	1.03363
70.53	60.4077	Train	631	CCCCCCCCCCCCCCCCCCCO	10.1223
71.728	70.6307	Train	783.86	CCCCCCCCCCCCCCCCCCCOC(=O)CCC	1.09732
67.172	66.9197	Train	738.1	CCCCCCCCCCCCCCCCCCCOC(C)=O	0.252315
64.833	65.3863	Train	714.52	CCCCCCCCCCCCCCCCCCCOC=O	0.55329
61.732	62.8072	Train	683.15	CCCCCCCCCCCCCCCCCCCc1ccccc1	1.0752
67.172	66.7315	Train	738.1	CCCCCCCCCCCCCCCCCCOC(=O)CC	0.44047
69.447	68.7168	Train	760.98	CCCCCCCCCCCCCCCCCCOC(=O)CCC	0.73018
64.902	64.9089	Train	715.22	CCCCCCCCCCCCCCCCCCOC(C)=O	0.00686
62.57	63.3472	Train	691.64	CCCCCCCCCCCCCCCCCCOC=O	0.77723
60.26	57.6359	Train	597.15	CCCCCCCCCCCCCCCCCO	2.62414
64.902	64.7367	Train	715.22	CCCCCCCCCCCCCCCCCOC(=O)CC	0.1653
67.172	66.7602	Train	738.1	CCCCCCCCCCCCCCCCCOC(=O)CCC	0.41175
59.662	60.8134	Train	662.15	CCCCCCCCCCCCCCCCCc1ccccc1	1.15139
62.639	62.733	Train	692.34	CCCCCCCCCCCCCCCCOC(=O)CC	0.09397
64.902	64.7869	Train	715.22	CCCCCCCCCCCCCCCCOC(=O)CCC	0.11513
58.062	59.2559	Train	645.88	CCCCCCCCCCCCCCCCOC=O	1.19389
58.482	59.676	Train	650.15	CCCCCCCCCCCCCCCCc1ccccc1	1.19402
60.382	60.7321	Train	669.46	CCCCCCCCCCCCCCCOC(=O)CC	0.35007
62.639	62.7626	Train	692.34	CCCCCCCCCCCCCCCOC(=O)CCC	0.123573
58.131	58.8319	Train	646.58	CCCCCCCCCCCCCCCOC(C)=O	0.700905
55.819	57.1795	Train	623	CCCCCCCCCCCCCCCOC=O	1.36047
59.41	58.6174	Train	639.16	CCCCCCCCCCCCCCCc1ccccc1	0.792576
60.382	60.6793	Train	669.46	CCCCCCCCCCCCCCOC(=O)CCC	0.29735
55.887	56.7488	Train	623.7	CCCCCCCCCCCCCCOC(C)=O	0.86183
53.582	55.0885	Train	600.12	CCCCCCCCCCCCCCOC=O	1.50648
56.225	57.4615	Train	627.15	CCCCCCCCCCCCCCc1ccccc1	1.23649
55.887	56.5799	Train	623.7	CCCCCCCCCCCCCOC(=O)CC	0.692918
58.131	58.5913	Train	646.58	CCCCCCCCCCCCCOC(=O)CCC	0.460343
53.65	54.6385	Train	600.82	CCCCCCCCCCCCCOC(C)=O	0.98846
57.42	56.234	Train	614.43	CCCCCCCCCCCCCc1ccccc1	1.18596
54.5	52.8201	Train	535	CCCCCCCCCCCCO	1.67987
53.65	54.4704	Train	600.82	CCCCCCCCCCCCOC(=O)CC	0.82044
55.887	56.493	Train	623.7	CCCCCCCCCCCCOC(=O)CCC	0.60599
49.131	50.8728	Train	554.36	CCCCCCCCCCCCOC=O	1.74177
61.633	62.1006	Train	682.15	CCCCCCCCCCCCc1ccc2ccccc2c1	0.46762
61.041	61.4913	Train	676.15	CCCCCCCCCCCCc1cccc2ccccc12	0.450333
56.8	54.9127	Train	600.76	CCCCCCCCCCCCc1ccccc1	1.88734
52.2	51.5505	Train	518.15	CCCCCCCCCCCO	0.649493
51.421	52.3546	Train	577.94	CCCCCCCCCCCOC(=O)CC	0.933595
49.199	50.3916	Train	555.06	CCCCCCCCCCCOC(C)=O	1.19262
46.917	48.7257	Train	531.48	CCCCCCCCCCCOC=O	1.8087
60.351	60.8572	Train	669.15	CCCCCCCCCCCc1ccc2ccccc2c1	0.506216
56.06	53.5187	Train	586.4	CCCCCCCCCCCc1ccccc1	2.54133
52.26	50.7867	Train	503.35	CCCCCCCCCCO	1.47333
49.199	50.2379	Train	555.06	CCCCCCCCCCOC(=O)CC	1.03894
45.534	46.9455	Train	517.15	CCCCCCCCCCOC(C)=O	1.41147
46.075	46.567	Train	508.6	CCCCCCCCCCOC=O	0.491986
52.595	53.5966	Train	590	CCCCCCCCCCOCCCCCCCCCC	1.00155
59.072	59.6117	Train	656.15	CCCCCCCCCCc1ccc2ccccc2c1	0.539664
58.679	59.196	Train	652.15	CCCCCCCCCCc1cccc2ccccc12	0.516953
53.53	52.0328	Train	571.04	CCCCCCCCCCc1ccccc1	1.49723
51.34	51.1574	Train	486.25	CCCCCCCCCO	0.182613
46.984	48.2816	Train	532.18	CCCCCCCCCOC(=O)CC	1.29764
47.271	48.6367	Train	535.15	CCCCCCCCCOC(=O)CCC	1.36566
46.721	46.2833	Train	509.3	CCCCCCCCCOC(C)=O	0.437652
43.031	44.6487	Train	485.72	CCCCCCCCCOC=O	1.61769
57.696	58.576	Train	642.15	CCCCCCCCCc1ccc2ccccc2c1	0.880023
73.97	74.8273	Train	722	CCCCCCCCCc1cccc(O)c1CCCCCCCCC	0.85734
58.37	58.7167	Train	639	CCCCCCCCCc1cccc2ccccc12	0.346667
51.57	50.8797	Train	555.2	CCCCCCCCCc1ccccc1	0.690277
61.94	56.9507	Train	581	CCCCCCCCCc1ccccc1O	4.98934
49.31	49.8732	Train	468.35	CCCCCCCCO	0.56318
46.586	46.459	Train	509.3	CCCCCCCCOC(=O)CC	0.127016
45.534	47.2249	Train	517.15	CCCCCCCCOC(=O)CCC	1.69087
66.13	65.2864	Train	657.15	CCCCCCCCOC(=O)c1ccccc1C(=O)OCCCCCCCC	0.8436
43.135	44.3188	Train	484.45	CCCCCCCCOC(C)=O	1.18384
44.21	43.692	Train	471.95	CCCCCCCCOC=O	0.518002
56.029	57.3417	Train	625.15	CCCCCCCCc1cccc2ccccc12	1.31272
48.92	49.1671	Train	537.55	CCCCCCCCc1ccccc1	0.247076
48.46	48.8307	Train	449.45	CCCCCCCO	0.37074
42.775	43.8953	Train	483.15	CCCCCCCOC(=O)CC	1.12035
43.617	45.6381	Train	498.25	CCCCCCCOC(=O)CCC	2.0211
41.482	42.3517	Train	465.55	CCCCCCCOC(C)=O	0.869715
40.488	41.5572	Train	451.25	CCCCCCCOC=O	1.0692
47.271	48.5339	Train	535.15	CCCCCCCOCCCCCCC	1.26292
54.757	55.7086	Train	612.15	CCCCCCCc1ccc2ccccc2c1	0.951645
54.562	55.4962	Train	610.15	CCCCCCCc1cccc2ccccc12	0.93421
47.75	47.385	Train	519.25	CCCCCCCc1ccccc1	0.364967
45.93	46.5575	Train	430.15	CCCCCCO	0.62745
40.994	43.1106	Train	463.15	CCCCCCOC(=O)CC	2.11663
41.87	45.2508	Train	479.15	CCCCCCOC(=O)CCC	3.38081
65.09	65.7078	Train	621.15	CCCCCCOC(=O)CCCCC(=O)OCCCCCC	0.61777
41.31	40.4541	Train	444.65	CCCCCCOC(C)=O	0.85593
38.241	39.4406	Train	428.65	CCCCCCOC=O	1.19957
48.12	45.3015	Train	498.85	CCCCCCOCCCCCC	2.81851
56.55	54.0446	Train	595.15	CCCCCCc1cccc2ccccc12	2.50541
44.95	45.4209	Train	499.26	CCCCCCc1ccccc1	0.47086
44.83	44.6976	Train	410.95	CCCCCO	0.13237
32.526	33.2392	Train	372.15	CCCCCOC	0.713166
39.174	41.1033	Train	441.9	CCCCCOC(=O)CC	1.92935
39.941	43.1305	Train	458.15	CCCCCOC(=O)CCC	3.18955
38.54	38.4752	Train	422.15	CCCCCOC(C)=O	0.0648
39.44	37.4013	Train	406.6	CCCCCOC=O	2.03869
56.29	52.9561	Train	583.16	CCCCCc1ccc2ccccc2c1	3.3339
42.27	43.4595	Train	478.61	CCCCCc1ccccc1	1.18946
43.24	42.37	Train	390.81	CCCCO	0.869986
30.468	30.5861	Train	343.35	CCCCOC	0.1181
38.66	38.3891	Train	419.75	CCCCOC(=O)CC	0.270924
40.29	40.5553	Train	438.15	CCCCOC(=O)CCC	0.265344
43.53	44.4011	Train	459.65	CCCCOC(=O)CCCC	0.871093
66.45	66.3074	Train	622.15	CCCCOC(=O)CCCCCCCCC(=O)OCCCC	0.14264
62.44	64.3598	Train	613.15	CCCCOC(=O)c1ccccc1C(=O)OCCCC	1.91982
36.51	36.3079	Train	399.15	CCCCOC(C)=O	0.202112
35.97	34.6723	Train	379.25	CCCCOC=O	1.29774
31.59	32.4155	Train	365.35	CCCCOCC	0.825546
37.35	36.7367	Train	413.44	CCCCOCCCC	0.61327
46.15	43.9952	Train	444.47	CCCCOCCO	2.15478
51.27	50.9935	Train	529.15	CCCCOCCOCCOCCCC	0.2765
42.672	43.0642	Train	480.15	CCCCc1ccc(C)cc1	0.392182
53.6	51.0342	Train	562.16	CCCCc1ccc2ccccc2c1	2.56583
42.486	42.872	Train	478.15	CCCCc1cccc(C)c1	0.386
52.56	50.9635	Train	562.54	CCCCc1cccc2ccccc12	1.59652
40.37	41.3463	Train	456.46	CCCCc1ccccc1	0.97631
42.765	43.2322	Train	481.15	CCCCc1ccccc1C	0.467224
46.973	48.5499	Train	500.15	CCCCc1ccccc1O	1.57692
41.38	40.9499	Train	370.35	CCCO	0.430095
31	27.8526	Train	311.72	CCCOC	3.14742
34.47	34.0665	Train	374.65	CCCOC(C)=O	0.40346
32.01	32.2682	Train	353.97	CCCOC=O	0.258173
32.21	31.9476	Train	362.79	CCCOCCC	0.262387
41.96	42.8402	Train	424.5	CCCOCCO	0.880157
52.148	52.5381	Train	585.41	CCCc1c(C)ccc2ccccc12	0.390124
42.664	42.8851	Train	480.75	CCCc1c(C)cccc1C	0.22106
42.166	42.3207	Train	475.39	CCCc1cc(C)cc(C)c1	0.154694
49.935	51.5955	Train	531.15	CCCc1cc(C)cc(O)c1	1.66049
42.357	42.5511	Train	477.45	CCCc1cc(C)ccc1C	0.194117
42.785	42.9448	Train	482.05	CCCc1ccc(C)c(C)c1	0.159763
48.35	49.3271	Train	515	CCCc1ccc(C)c(O)c1	0.977072
39.708	40.5331	Train	453.53	CCCc1ccc(C)cc1	0.825096
42.571	42.7775	Train	479.75	CCCc1ccc(C)cc1C	0.206466
51.577	53.4897	Train	547.87	CCCc1ccc(C)cc1O	1.91269
42.486	42.5444	Train	478.15	CCCc1ccc(CC)cc1	0.058357
48.365	49.365	Train	515.15	CCCc1ccc(O)c(C)c1	1.00001
47.327	49.0014	Train	506.65	CCCc1ccc(O)cc1	1.67441
50.313	51.9975	Train	535	CCCc1ccc(O)cc1C	1.68454
40.248	40.6618	Train	455.13	CCCc1cccc(C)c1	0.41376
42.952	43.1308	Train	483.85	CCCc1cccc(C)c1C	0.178848
48.35	49.5232	Train	515	CCCc1cccc(C)c1O	1.17321
42.114	42.1798	Train	474.15	CCCc1cccc(CC)c1	0.065756
46.888	48.6877	Train	502.15	CCCc1cccc(O)c1	1.7997
48.35	48.9857	Train	515	CCCc1cccc(O)c1C	0.63566
51.41	49.3598	Train	545.96	CCCc1cccc2ccccc12	2.05024
38.36	39.0203	Train	432.39	CCCc1ccccc1	0.6603
40.517	41.0396	Train	458.08	CCCc1ccccc1C	0.522562
42.3	42.4326	Train	476.15	CCCc1ccccc1CC	0.132617
39.4	38.7568	Train	351.44	CCO	0.64316
48.34	51.8	Train	498.15	CCOC(=O)/C=C\C(=O)OCC	3.45996
45.14	46.0441	Train	458.85	CCOC(=O)C(=O)OCC	0.90413
47.15	47.0183	Train	427.65	CCOC(=O)C(C)O	0.131697
33.45	33.9981	Train	372.25	CCOC(=O)CC	0.54808
46.09	47.8925	Train	472.05	CCOC(=O)CC(=O)OCC	1.80254
36.61	37.3876	Train	407.45	CCOC(=O)CC(C)C	0.777573
50.57	50.7561	Train	489.65	CCOC(=O)CCC(=O)OCC	0.186104
57.43	57.4509	Train	567.15	CCOC(=O)c1ccccc1C(=O)OCC	0.020886
29.292	29.988	Train	345.95	CCOC(C)(C)C	0.696045
32.23	32.0712	Train	350.21	CCOC(C)=O	0.15876
27.904	28.5491	Train	326.15	CCOC(C)C	0.645149
30.616	31.0495	Train	354.35	CCOC(C)CC	0.43352
29.79	30.1371	Train	327.46	CCOC=O	0.347133
27.09	27.2496	Train	307.58	CCOCC	0.159588
30.607	31.0246	Train	354.25	CCOCC(C)C	0.417637
42.56	42.6639	Train	438.15	CCOCCC(=O)OCC	0.103948
40.38	41.5626	Train	429.45	CCOCCOC(C)=O	1.18256
46.73	49.4306	Train	475.15	CCOCCOCCO	2.70056
47.41	49.0319	Train	490.55	CCOCCOCCOC(C)=O	1.62194
44.76	44.0353	Train	462.15	CCOCCOCCOCC	0.7247
41.67	42.0959	Train	458.15	CCOCc1ccccc1	0.425863
69.05	64.6971	Train	567	CCOc1cc(C=O)ccc1O	4.35293
41.02	40.8866	Train	443.15	CCOc1ccccc1	0.133426
52.148	52.4235	Train	585.41	CCc1c(C)cc(C)c2ccccc12	0.27553
43.046	43.2209	Train	485.55	CCc1c(C)cc(C)cc1C	0.17486
50.231	51.2387	Train	535	CCc1c(C)cc(C)cc1O	1.00771
49.951	50.8279	Train	532.15	CCc1c(C)cc(O)cc1C	0.87689
43.436	43.5624	Train	489.75	CCc1c(C)ccc(C)c1C	0.126412
48.336	49.1509	Train	546.15	CCc1c(C)ccc2ccccc12	0.81487
41.79	41.3177	Train	463.19	CCc1c(C)cccc1C	0.47229
54.84	56.4737	Train	571.16	CCc1c(CC)c(CC)c(CC)c(CC)c1CC	1.63367
[truncated: 863 more rows]

## Sheet: Literature_2
Pred_literature	Train/Valid/Test	HoV (kJ/mol)	temperature	smiles	AE
72.388	training	72.477	649.7	CC(C)C1=CC2=CC[C@H]3[C@](C)(C(=O)O)CCC[C@]3(C)[C@H]2CC1	0.0889594
50.0198	training	50.9	550.54	c1cc2c3c(cccc3c1)CC2	0.880181
35.9628	training	35.129	376.75	CCOC(C)OCC	0.833812
25.6911	training	23.991	293.55	CC=O	1.7001
25.0225	test	23.33	391.05	CC(=O)O	1.69247
40.8987	training	40.83	411.78	CC(=O)OC(C)=O	0.0687092
28.9809	validation	29.792	329.44	CC(C)=O	0.811098
44.2426	training	44.253	475.15	CC(=O)c1ccccc1	0.0103959
41.5202	training	40.828	413.55	CC(=O)CC(C)=O	0.692163
28.6862	test	29.03	325.84	C=CC=O	0.343752
39.7339	training	42.52	414.15	C=CC(=O)O	2.78607
76.164	training	72.94	611	O=C(O)CCCCC(=O)O	3.22401
20.5195	training	20.599	238.65	C=C=C	0.079488
32.5801	training	33.531	377.15	C=CCOC(C)=O	0.950852
39.5741	training	39.8	370.23	C=CCO	0.225879
37.9522	training	38.543	438.65	C=C(C)c1ccccc1	0.590842
39.288	training	39.908	448.15	CC1=CCC(C(C)C)C=C1	0.620022
34.7678	training	35.744	429.29	CC1=CCC2CC1C2(C)C	0.976195
47.8189	training	47.73	508.45	CC=Cc1ccc(OC)cc1	0.0889421
39.1325	training	39.307	426.73	COc1ccccc1	0.174513
56.5142	test	54.918	615.18	c1ccc2cc3ccccc3cc2c1	1.59624
62.038	training	62.02	653.05	O=C1c2ccccc2C(=O)c2ccccc21	0.0179682
115.303	training	115.309	637	O=C1C(O)=C(O)OC1C(O)CO	0.00621415
76.547	training	76.203	633.36	O=C(O)CCCCCCCC(=O)O	0.343974
55.5023	training	55.48	515.16	c1ccc2cccc-2cc1	0.0222572
42.204	training	42.13	451.9	O=Cc1ccccc1	0.0739887
31.7897	training	30.746	353.24	c1ccccc1	1.04373
68.4831	training	68.38	581.85	Oc1cccc(O)c1O	0.103103
51.2133	validation	50.625	522.4	O=C(O)c1ccccc1	0.588313
54.0066	training	54.027	579.24	O=C(c1ccccc1)c1ccccc1	0.0203929
43.3281	training	44.583	486.65	CC(=O)OCc1ccccc1	1.2549
48.2098	training	51.66	477.85	OCc1ccccc1	3.45024
58.9493	training	58.707	596.65	O=C(OCc1ccccc1)c1ccccc1	0.242329
41.9095	validation	41.674	458.15	CCOCc1ccccc1	0.235498
39.9937	training	39.502	447.15	C=C1C=CC(C(C)C)CC1	0.491721
37.3547	training	37.828	439.19	C=C1CCC2CC1C2(C)C	0.473323
41.598	training	43.057	435.15	O=C1CCO1	1.45902
44.1406	validation	44.516	512.19	C1CCC(C2CCCCC2)CC1	0.375409
72.3621	training	72.178	633.65	CC(C)(c1ccc(O)cc1)c1ccc(O)cc1	0.184098
24.5854	training	24.22	284	C=C=CC	0.365407
24.165	training	22.435	272.65	CCCC	1.72995
60.3937	training	62.43	501.15	OCCCCO	2.03629
56.8852	validation	56.58	480.15	CC(O)CCO	0.305174
53.8552	training	53.53	464.15	CCC(O)CO	0.325229
38.0218	training	42.703	372.7	CCC(C)O	4.68125
35.7858	training	54.182	355.57	CC(C)(C)O	18.3962
42.3712	test	43.237	390.81	CCCCO	0.865806
23.4632	training	22.905	274.03	CC=CC	0.558199
23.4632	training	23.43	276.87	CC=CC	0.0331985
22.8737	test	22.443	266.9	C=CCC	0.4307
61.8481	training	62.95	510	OCC=CCO	1.10193
61.8481	training	62.74	508.15	OCC=CCO	0.891934
43.6885	training	48.854	445.05	CC=CC(=O)O	5.16546
43.6885	training	48.878	458.15	CC=CC(=O)O	5.18946
41.3131	training	41.453	471.83	CCC=Cc1ccccc1	0.1399
41.3131	training	40.563	462.15	CCC=Cc1ccccc1	0.7501
46.0195	test	46.153	444.47	CCCCOCCO	0.133521
36.2393	training	36.511	399.15	CCCCOC(C)=O	0.27172
34.0686	validation	34.683	385.15	CCC(C)OC(C)=O	0.61443
32.7431	training	32.577	369.15	CC(=O)OC(C)(C)C	0.16608
38.2843	training	37.464	421	C=CC(=O)OCCCC	0.820338
48.3028	training	49.266	523.15	CCCCOC(=O)c1ccccc1	0.963196
41.2665	training	36.391	409.15	CCCC(=O)OC(C)(C)C	4.87552
39.1931	training	40.285	438.15	CCCCOC(=O)CCC	1.09189
40.8402	training	38.214	425.15	CCCC(=O)OC(C)CC	2.62625
30.4677	training	30.604	355.95	CC(C)(C)OC=O	0.136307
34.7323	validation	35.97	379.25	CCCCOC=O	1.23768
32.3237	training	31.35	363.55	CCC(C)OC=O	0.973667
39.3482	training	40.2	434	C=C(C)C(=O)OCCCC	0.85178
49.3414	training	50.524	503	CCCCCCCCC(=O)OCCCC	1.18255
38.0228	test	41.093	414.55	CCC(=O)OC(C)(C)C	3.07018
38.2465	training	40.061	406.15	CCC(=O)OC(C)CC	1.81449
37.3118	training	38.663	419.75	CCCCOC(=O)CC	1.35117
68.5948	training	58.351	623.15	CCCCCCCCCCCCCCCCCC(=O)OCCCC	10.2438
41.165	validation	43.529	459.65	CCCCOC(=O)CCCC	2.36396
31.3744	training	32.896	366.97	C=COCCCC	1.52163
49.1209	training	48.868	551.65	CCCCC1CCc2ccccc2C1	0.252869
49.1209	training	48.348	546.28	CCCCC1CCCc2ccccc21	0.772869
37.2627	test	38.442	442.3	CC(C)(C)c1ccccc1	1.17933
39.0462	test	39.116	446.48	CCC(C)c1ccccc1	0.0697751
41.0878	training	40.372	456.46	CCCCc1ccccc1	0.715813
39.3138	training	38.744	454.13	CCCCC1CCCCC1	0.569795
33.9128	test	35.119	418	CC(C)(C)C1CCCC1	1.20621
36.4874	training	36.359	429.76	CCCCC1CCCC1	0.128446
35.0752	training	36.631	427.5	CCC(C)C1CCCC1	1.55579
35.9745	training	37.217	429.15	CCCCC1=CCCC1	1.24255
51.4571	training	52.561	562.54	CCCCc1cccc2ccccc12	1.10388
51.4571	training	53.597	562.16	CCCCc1ccc2ccccc2c1	2.13988
49.1736	training	49.034	521.15	CCCCc1ccc(O)cc1	0.139584
49.1736	training	46.296	508.15	CCCCc1ccccc1O	2.87758
49.1736	training	48.936	520.15	CCCCc1cccc(O)c1	0.237584
68.5906	validation	68.612	511.15	OCC#CCO	0.0213797
30.9043	training	31.788	347.95	CCCC=O	0.883677
41.4256	validation	45.29	436.42	CCCC(=O)O	3.86442
46.9636	training	46.733	468.15	CCCC(=O)OC(=O)CCC	0.230592
37.3547	training	36.318	433.65	C=C1C2CCC(C2)C1(C)C	1.03668
42.0588	training	41.637	480.57	CC12CCC(CC1=O)C2(C)C	0.421771
14.665	training	5.91	81.7	[C-]#[O+]	8.755
66.0773	training	68.9	714.15	c1ccc2c(c1)ccc1c3ccccc3ccc21	2.82269
70.5353	training	73.07	607	C/C(=C/C(=O)O)C(=O)O	2.53469
102.27	validation	102.225	659	O=C(O)CC(O)(CC(=O)O)C(=O)O	0.0446005
46.7016	training	48.678	475.43	Cc1cccc(O)c1	1.97644
46.7016	training	49.631	475.13	Cc1ccc(O)cc1	2.92944
46.7016	training	45.666	464.15	Cc1ccccc1O	1.03556
34.6329	training	34.805	377.25	C/C=C/C=O	0.17211
36.6157	training	38.07	425.56	CC(C)c1ccccc1	1.45429
44.5354	training	44.522	442.7	CC(C)(OO)c1ccccc1	0.013374
61.4307	training	61.17	608.15	CC(C)(c1ccccc1)c1ccc(O)cc1	0.260701
23.9006	training	23.982	285.66	C1CCC1	0.081355
24.9888	training	25.807	275.75	C1=CCC1	0.818221
40.4061	training	40.704	475.15	C1CCCCCCCCC1	0.297911
44.6983	training	45.053	512.15	C1CCCCCCCCCCC1	0.354664
55.1552	training	55.638	621.15	C1CCCCCCCCCCCCCCCCCCC1	0.482798
52.5561	training	52.22	586.15	C1CCCCCCCCCCCCCCCC1	0.336099
32.6934	training	33.547	391.94	C1CCCCCC1	0.853608
33.7162	training	35.317	388.65	C1=CC=CCC=C1	1.60081
51.3201	training	50.955	573.15	C1CCCCCCCCCCCCCCC1	0.365067
30.483	training	30.591	353.49	C1=CCCC=C1	0.10803
29.8224	validation	29.889	353.87	C1CCCCC1	0.0665571
80.8215	training	80.764	669	O=C(O)C1CCC(C(=O)O)CC1	0.0575386
46.3651	training	40.259	434	OC1CCCCC1	6.1061
39.5618	training	37.097	428.9	O=C1CCCCC1	2.46485
31.1757	training	31.11	356.12	C1=CCCCC1	0.0656627
49.7407	training	49.744	490	OOC1CCCCC1	0.00329426
44.0565	training	47.151	513.27	c1ccc(C2CCCCC2)cc1	3.09451
54.4802	training	54.562	610.15	C1CCCCCCCCCCCCCCCCCC1	0.0817665
38.004	training	38.745	451.55	C1CCCCCCCC1	0.741023
53.6119	training	53.39	598.15	C1CCCCCCCCCCCCCCCCC1	0.221857
38.3268	training	37.454	423.27	C1=CCCC=CCC1	0.872837
35.4297	training	35.92	424.3	C1CCCCCCC1	0.49035
37.5093	training	36.401	413.16	C1=CC=CC=CC=C1	1.10829
49.9111	training	49.595	559.15	C1CCCCCCCCCCCCCC1	0.316055
27.1926	training	25.76	314.65	C1=CCC=C1	1.4326
26.8666	test	27.259	322.4	C1CCCC1	0.39241
37.3255	test	37.62	403.8	O=C1CCCC1	0.29454
28.0107	training	27.6	317.38	C1=CCCC1	0.410681
21.022	test	20.083	240.37	C1CC1	0.939049
48.3354	training	48.142	544.15	C1CCCCCCCCCCCCC1	0.193423
46.5974	training	46.692	529.15	C1CCCCCCCCCCCC1	0.094564
42.6361	training	42.13	494.15	C1CCCCCCCCCC1	0.506056
39.3073	training	39.099	448.23	Cc1cccc(C(C)C)c1	0.208253
39.3073	test	39.747	450.28	Cc1ccc(C(C)C)cc1	0.439747
39.3073	training	39.377	451.33	Cc1ccccc1C(C)C	0.0697467
39.5946	training	39.801	468.97	C1CCC2CCCCC2C1	0.206408
39.5946	test	38.62	460.46	C1CCC2CCCCC2C1	0.974592
46.3499	validation	46.728	488.15	CCCCCCCCCC=O	0.378109
39.4892	training	40.017	447.3	CCCCCCCCCC	0.527844
60.592	training	65.387	553.15	CCCCCCCCC(O)CO	4.79499
61.2618	training	76.11	503.47	CCCCCCCC(O)CCO	14.8482
63.0129	training	69.306	585.15	CCCCCCC(O)CCCO	6.29307
62.3796	training	68.242	572.15	OCCCCCCCCCCO	5.86243
58.8036	test	75.126	543.15	CCCCCCCCCC(=O)O	16.3224
52.7409	training	46.517	503.35	CCCCCCCCCCO	6.22389
48.5968	training	45.164	490.15	CCCCCCCCC(C)O	3.43276
48.2035	training	49.145	483	CCCCCCCC(O)CC	0.941541
48.2035	training	48.208	474.15	CCCCCC(O)CCCC	0.0045411
48.2035	training	49.16	483.15	CCCCCCC(O)CCC	0.956541
44.5825	training	44.867	483.35	CCCCCCCCC(C)=O	0.284512
40.1363	training	39.358	443.75	C=CCCCCCCCC	0.778268
47.2738	test	45.534	517.15	CCCCCCCCCCOC(C)=O	1.7398
51.3996	training	49.014	553.15	CCCCCCCCCCOC(=O)CCC	2.38559
46.1384	training	46.075	508.6	CCCCCCCCCCOC=O	0.0633699
49.3414	training	49.199	555.06	CCCCCCCCCCOC(=O)CC	0.142448
56.7353	training	56.911	634.15	CCCCCCCCCCC1CCCc2ccccc21	0.175743
56.7353	test	57.107	636.15	CCCCCCCCCCC1CCc2ccccc2C1	0.371743
52.0495	test	53.535	571.04	CCCCCCCCCCc1ccccc1	1.48554
50.9594	training	50.373	570.75	CCCCCCCCCCC1CCCCC1	0.586363
49.2437	training	48.995	552.54	CCCCCCCCCCC1CCCC1	0.2487
46.7567	test	47.948	542.15	CCCCCCCCCCC1=CCCC1	1.19134
59.1578	training	58.679	652.15	CCCCCCCCCCc1cccc2ccccc12	0.478762
59.1578	validation	59.072	656.15	CCCCCCCCCCc1ccc2ccccc2c1	0.0857619
39.6224	training	39.509	452.45	CCC#CCCCCCC	0.113411
39.6224	training	39.994	457.75	CC#CCCCCCCC	0.371589
40.1472	validation	39.652	447.16	C#CCCCCCCCC	0.495227
54.0164	training	54.209	520	C=CCOC(=O)/C=C\C(=O)OCC=C	0.192638
45.5101	training	45.493	557.86	c1ccc2c(c1)oc1ccccc12	0.0171398
55.573	training	53.704	561.45	c1ccc(COCc2ccccc2)cc1	1.86904
37.1279	training	37.346	413.44	CCCCOCCCC	0.218084
57.026	training	58.149	553.15	CCCCOC(=O)/C=C\C(=O)OCCCC	1.12304
62.7332	training	62.436	613.15	CCCCOC(=O)c1ccccc1C(=O)OCCCC	0.297184
65.7146	training	66.448	622.15	CCCCOC(=O)CCCCCCCCC(=O)OCCCC	0.733409
51.2756	training	51.265	669	CC(C)(OOC(C)(C)c1ccccc1)c1ccccc1	0.0106362
50.4882	training	50.272	566.12	CCCC(C1CCCCC1)C1CCCCC1	0.216165
57.678	training	57.5	640.15	CCCCCCCCCC(C1CCCCC1)C1CCCCC1	0.177958
59.4975	training	59.465	660.15	CCCCCCCCCCCC(C1CCCCC1)C1CCCCC1	0.0325193
47.0449	training	48.158	544.32	CC(C1CCCCC1)C1CCCCC1	1.11312
54.5224	training	54.073	605.15	CCCCCCC(C1CCCCC1)C1CCCCC1	0.449448
62.7908	training	63.114	697.15	CCCCCCCCCCCCCCCC(C1CCCCC1)C1CCCCC1	0.323176
53.3001	validation	52.902	593.15	CCCCCC(C1CCCCC1)C1CCCCC1	0.398067
46.5794	training	46.383	525.95	C1CCC(CC2CCCCC2)CC1	0.19643
56.6955	training	56.421	629.15	CCCCCCCCC(C1CCCCC1)C1CCCCC1	0.274504
55.6486	validation	55.246	617.15	CCCCCCCC(C1CCCCC1)C1CCCCC1	0.402583
61.9951	training	62.225	688.15	CCCCCCCCCCCCCCC(C1CCCCC1)C1CCCCC1	0.229856
51.9623	training	51.636	580.15	CCCCC(C1CCCCC1)C1CCCCC1	0.326265
48.8561	training	49.359	556.71	CCC(C1CCCCC1)C1CCCCC1	0.502937
61.1844	validation	61.337	679.15	CCCCCCCCCCCCCC(C1CCCCC1)C1CCCCC1	0.152618
60.3538	training	60.45	670.15	CCCCCCCCCCCCC(C1CCCCC1)C1CCCCC1	0.0962179
58.6085	validation	58.482	650.15	CCCCCCCCCCC(C1CCCCC1)C1CCCCC1	0.126469
37.1548	training	38.45	443.15	C1=CC2C3C=CC(C3)C2C1	1.29518
55.0758	training	52.595	590	CCCCCCCCCCOCCCCCCCCCC	2.48082
37.9762	training	37.975	399.95	CCOC(=O)OCC	0.0011944
26.6085	validation	27.087	307.58	CCOCC	0.478526
33.5939	training	33.571	375.14	CCC(=O)CC	0.0228848
47.9716	training	48.34	498.15	CCOC(=O)/C=C\C(=O)OCC	0.368448
47.112	training	46.086	472.05	CCOC(=O)CC(=O)OCC	1.02602
45.8036	training	45.144	458.85	CCOC(=O)C(=O)OCC	0.659645
57.3583	training	57.425	567.15	CCOC(=O)c1ccccc1C(=O)OCC	0.0666961
50.023	training	50.57	489.65	CCOC(=O)CCC(=O)OCC	0.547037
57.9568	training	58.22	507.15	CCC(CC)(CO)CO	0.263151
43.6882	training	43.784	446	CCC(CC)(CC)CO	0.0958328
36.5294	test	37.53	442.86	CCC(CC)(CC)C(C)C	1.00058
43.7653	test	45.163	461	CCC(CC)(CC)C(C)O	1.39768
40.3556	training	40.333	454.29	CCc1cccc(CC)c1	0.0225775
40.3556	training	40.245	456.61	CCc1ccccc1CC	0.110578
40.3556	training	40.584	456.94	CCc1ccc(CC)cc1	0.228422
36.2644	training	36.474	426.71	CCC1CCCC1CC	0.209562
35.9754	training	36.297	423.65	CCC1(CC)CCCC1	0.321604
36.2644	training	36.155	423.15	CCC1CCC(CC)C1	0.109438
36.2644	training	35.934	420.68	CCC1CCCC1CC	0.330438
36.2644	training	36.155	423.15	CCC1CCC(CC)C1	0.109438
57.244	training	56.723	518.15	OCCOCCO	0.521041
51.2684	training	51.27	529.15	CCCCOCCOCCOCCCC	0.00159305
44.1888	training	44.763	462.15	CCOCCOCCOCC	0.574204
40.7946	training	41.232	432.91	COCCOCCOC	0.437445
48.58	training	47.41	490.55	CCOCCOCCOC(C)=O	1.16998
53.1601	training	54.049	504.15	CCCCOCCOCCO	0.888871
39.5948	training	39.664	453.15	CCCC(CC)C(CC)CC	0.069195
39.4425	test	39.897	460.05	CCCCC(CC)(CC)CC	0.454538
39.4425	training	39.298	453.45	CCCC(CC)(CC)CCC	0.144462
39.5948	training	39.573	452.15	CCC(CC)CC(CC)CC	0.021805
37.0733	training	37.614	439.46	CCCC(CC)(CC)CC	0.540721
37.379	training	37.656	437.06	CCC(CC)C(CC)CC	0.277022
51.6432	training	52.148	585.41	CCc1ccc2cccc(CC)c2c1	0.504765
51.6432	training	52.148	585.41	CCc1cc2ccccc2cc1CC	0.504765
51.6432	training	52.148	585.41	CCc1ccc(CC)c2ccccc12	0.504765
51.6432	training	52.148	585.41	CCc1ccc2ccccc2c1CC	0.504765
51.6432	training	52.148	585.41	CCc1ccc2c(CC)cccc2c1	0.504765
41.6654	training	41.31	473.15	CCCCC(CC)(CC)CCC	0.355436
41.6654	training	41.789	478.15	CCCCCC(CC)(CC)CC	0.123564
41.6513	training	41.502	475.15	CCC(CC)CCC(CC)CC	0.149295
41.6513	validation	41.024	470.15	CCCC(CC)CC(CC)CC	0.627295
41.6513	training	41.024	470.15	CCCC(CC)C(CC)CCC	0.627295
41.6513	training	41.215	472.15	CCCCC(CC)C(CC)CC	0.436295
34.587	training	35.282	419.34	CCC(CC)(CC)CC	0.695013
48.6383	training	51.577	547.87	CCc1ccc(O)cc1CC	2.9387
48.6383	training	46.993	501.15	CCc1ccc(O)c(CC)c1	1.6453
48.6383	training	46.881	500	CCc1ccc(CC)c(O)c1	1.7573
48.6383	training	47.37	505	CCc1cccc(O)c1CC	1.2683
48.6383	training	46.014	491.15	CCc1cccc(CC)c1O	2.6243
49.1952	test	47.271	535.15	CCCCCCCOCCCCCCC	1.92424
65.7146	training	65.089	621.15	CCCCCCOC(=O)CCCCC(=O)OCCCCCC	0.625591
45.9786	training	48.12	498.85	CCCCCCOCCCCCC	2.14135
29.8564	training	30.391	339	C1=CCOC1	0.534648
54.5159	training	53.106	538.15	Cc1c(O)cccc1O	1.40995
54.5159	training	54.959	556.15	Cc1cc(O)ccc1O	0.44305
51.1141	training	51.359	521.15	Cc1cccc(O)c1O	0.244909
54.5159	training	53.621	543.15	Cc1ccc(O)cc1O	0.89495
54.5159	training	52.387	531.15	Cc1ccc(O)c(O)c1	2.12895
54.5159	training	55.371	560.15	Cc1cc(O)cc(O)c1	0.85505
39.6763	training	39.572	441.41	CC(C)CC(=O)CC(C)C	0.104294
71.2641	training	71.205	723	CC(C)CCCCCCCOC(=O)c1ccccc1C(=O)OCCCCCCCC(C)C	0.0590664
70.9147	training	71.106	694	CC(C)CCCCCOC(=O)c1ccccc1C(=O)OCCCCCC(C)C	0.191345
29.4741	training	29.58	341.45	CC(C)OC(C)C	0.105916
41.8655	training	41.618	476.33	CC(C)c1cccc(C(C)C)c1	0.247509
41.8655	training	42.924	483.65	CC(C)c1ccc(C(C)C)cc1	1.05849
38.709	training	38.82	399.2	C=C1CC(=O)O1	0.11103
31.4482	training	31.903	357.2	COCCOC	0.454757
22.5299	training	21.56	248.31	COC	0.969945
47.5419	training	47.099	478.15	COC(=O)/C=C\C(=O)OC	0.44287
53.9062	training	54.997	556.85	COC(=O)c1ccccc1C(=O)OC	1.09079
53.9062	training	52.83	561.15	COC(=O)c1ccc(C(=O)OC)cc1	1.07621
54.8357	training	54.17	480	CC(C)C(C)(O)CO	0.665716
56.0838	training	54.012	478.65	CC(C)(C)C(O)CO	2.07178
56.2779	training	58.799	517.03	CC(C)(C)CC(O)CO	2.52108
28.5589	training	28.911	341.93	C=C(C)C(=C)C	0.352139
53.4681	training	54.17	480	CC(CO)C(C)(C)O	0.701896
54.868	training	53.649	475.55	CC(O)C(C)(C)CO	1.21896
56.2779	training	55.104	485.65	CCC(O)C(C)(C)CO	1.17392
56.02	training	58.799	517.03	CCC(C)(O)C(C)CO	2.77895
57.0051	training	62.145	483	CC(C)(CO)CO	5.13986
57.2202	training	54.17	480	CC(C)(CO)CCO	3.05023
55.6937	training	58.799	517.03	CC(CCO)C(C)(C)O	3.10528
57.6015	training	56.686	494.25	CC(C)(CO)CCCO	0.915501
57.4201	training	56.686	494.25	CC(C)(CCO)CCO	0.734122
40.5916	training	39.669	416.15	CC(C)(C)CCO	0.922563
39.8499	training	37.935	409.95	CCC(C)(C)CO	1.91486
40.6807	training	39.805	422.15	CC(C)C(C)CO	0.875741
26.9876	training	27.472	328.76	C=C(C)C(C)C	0.484388
26.7136	training	25.925	314.4	C=CC(C)(C)C	0.788586
26.8624	training	25.479	310.87	C#CC(C)(C)C	1.38341
34.6739	training	34.604	409.15	CCC1(C)CCC(C)C1	0.0698833
34.6739	training	34.604	409.15	CCC1(C)CCC(C)C1	0.0698833
34.6739	training	35.314	417.15	CCC1(C)CCCC1C	0.640117
34.6739	training	35.314	417.15	CCC1(C)CCCC1C	0.640117
51.7251	training	52.148	585.41	CCc1ccc(C)c2cc(C)ccc12	0.422924
51.7251	training	52.148	585.41	CCc1c(C)cc(C)c2ccccc12	0.422924
46.2933	test	44.988	455	CC(C)(C)CCCCCO	1.30526
46.9062	training	45.481	455	CC(C)CC(C)CCCO	1.42525
45.4016	training	46.034	465.15	CCCCCC(C)(C)CO	0.632401
44.7641	validation	44.372	447	CCCC(C)C(C)CO	0.392111
44.5295	training	44.705	455	CC(C)(C)CCCCO	0.175513
45.0886	training	45.2	455	CC(C)C(C)CCCO	0.111427
44.5295	validation	44.705	455	CCC(C)(C)CCCO	0.175513
44.7641	training	44.491	448.15	CCC(C)CC(C)CO	0.273111
45.0886	training	45.319	456.15	CC(C)CC(C)CCO	0.230427
45.0886	training	45.097	454	CCC(C)C(C)CCO	0.00842669
44.7641	training	44.905	452.15	CC(C)CCC(C)CO	0.140889
44.5295	training	44.603	454	CCCC(C)(C)CCO	0.0735133
43.6882	training	43.748	445.65	CCCCC(C)(C)CO	0.0598328
32.339	training	32.673	384.35	C=C(C)CC(C)CC	0.333962
31.9399	training	31.96	380.35	C=CCC(C)(C)CC	0.0201117
32.339	training	32.61	383.65	C=C(C)C(C)CCC	0.270962
32.339	training	32.708	384.75	C=C(C)CCC(C)C	0.368962
31.9399	test	31.678	377.15	C=CC(C)(C)CCC	0.261888
32.2596	training	32.704	385.15	C=CC(C)C(C)CC	0.444379
32.2596	training	31.992	377.15	C=CC(C)CC(C)C	0.267621
32.2596	test	32.437	382.15	C=CCC(C)C(C)C	0.177379
31.9399	training	31.546	375.65	C=CCCC(C)(C)C	0.393888
48.579	training	48.889	485	CCCC(C)C(C)CCCO	0.309981
48.579	training	48.889	485	CCC(C)CC(C)CCCO	0.309981
48.579	training	48.889	485	CC(C)CCC(C)CCCO	0.309981
47.9407	training	48.37	485	CC(C)(C)CCCCCCO	0.429266
48.579	training	48.905	485.15	CC(C)CCCC(C)CCO	0.325981
48.1895	training	48.679	483	CCC(C)CCCC(C)CO	0.489494
47.0007	training	47.97	481.15	CCCCCCC(C)(C)CO	0.969299
42.8101	training	42.564	432.15	CC(C)CC(C)CO	0.246072
42.6293	validation	42.196	433.15	CC(C)(C)CCCO	0.433334
43.1015	training	43.18	438.15	CC(C)C(C)CCO	0.0785386
42.8101	training	43.077	437.15	CCC(C)C(C)CO	0.266928
41.8388	validation	41.485	426.15	CCCC(C)(C)CO	0.353774
42.6293	test	42.704	438.15	CCC(C)(C)CCO	0.0746659
29.6857	training	29.86	354.76	C=C(C)CC(C)C	0.174303
29.6857	training	30.096	357.43	C=C(C)C(C)CC	0.410303
29.3243	test	29.173	350.63	C=CC(C)(C)CC	0.151293
29.6676	training	29.752	353.95	C=CC(C)C(C)C	0.084422
29.3243	validation	28.74	345.67	C=CCC(C)(C)C	0.584293
28.6299	training	28.934	349.23	C#CCC(C)(C)C	0.304137
28.9154	training	29.558	353.15	C#CC(C)C(C)C	0.642596
28.6299	training	28.405	343.15	C#CC(C)(C)CC	0.224863
37.7393	training	41.35	386.25	CC(C)(C)CO	3.61073
52.8175	training	49.089	445.95	CC(C)(O)C(C)(C)O	3.72847
53.0647	training	52.991	589	CC(C)(c1ccccc1)C(C)(C)c1ccccc1	0.0736528
53.8766	training	58.56	525.85	CCC(C)(O)C(C)(C)O	4.68336
55.2851	test	51.462	459.15	CC(C)C(O)C(C)(C)O	3.82308
53.2196	validation	52.121	470	CC(C)(O)CC(C)(C)O	1.09856
37.9403	training	35.869	391.75	CC(C)C(C)(C)O	2.07133
38.3314	test	36.004	393.15	CC(O)C(C)(C)C	2.32743
33.2652	validation	32.071	379.45	CC(=O)C(C)(C)C	1.19416
29.8126	training	29.408	346.35	CC(C)=C(C)C	0.404569
42.9269	training	43.353	446	CCC(CO)C(C)(C)C	0.42609
42.7511	test	43.353	446	CCC(C)(CO)C(C)C	0.601892
30.9939	training	31.964	383.15	C=C(CC)C(C)(C)C	0.970082
46.6017	training	48.011	486	CCC(CO)CCC(C)(C)C	1.40929
44.6123	training	45.178	461.15	CCC(C)(CO)CC(C)C	0.565662
34.6739	training	34.782	411.15	CCC1CCCC1(C)C	0.108117
48.4133	test	48.271	515	CCc1c(O)ccc(C)c1C	0.142252
48.4133	validation	50.231	535	CCc1c(C)cc(C)cc1O	1.81775
44.3924	training	44.55	455	CCC(C)CCC(C)(C)O	0.157559
44.3924	validation	43.443	444.15	CC(C)CCCC(C)(C)O	0.949441
44.1343	training	44.55	455	CCCCC(C)C(C)(C)O	0.41571
44.8062	training	46.292	467.15	CC(C)CC(C)CC(C)O	1.48577
44.8062	training	46.086	465.15	CC(O)CCC(C)C(C)C	1.27977
44.3924	training	44.55	455	CCCC(C)CC(C)(C)O	0.157559
43.0929	training	42.706	435	CC(O)CC(C)C(C)C	0.386873
42.4407	training	42.659	439.15	CC(O)CCC(C)(C)C	0.218347
42.1088	training	41.11	423.85	CCC(C)CC(C)(C)O	0.998803
42.1923	training	42.036	433	CCCC(C)(C)C(C)O	0.156314
43.017	test	43.643	444.15	CCC(C)C(C)C(C)O	0.626031
43.017	training	42.517	433.15	CC(C)CC(C)C(C)O	0.499969
42.4407	training	42.239	435	CCC(C)(C)CC(C)O	0.201653
41.8863	test	42.062	433.25	CCCC(C)C(C)(C)O	0.175743
42.1088	training	41.293	425.65	CC(C)CCC(C)(C)O	0.815803
32.4913	test	32.682	385.35	CC(C)=CCC(C)C	0.190677
32.4913	training	32.54	383.75	CCC(C)C=C(C)C	0.0486769
34.024	training	33.575	394.92	CCCC(C)=C(C)C	0.449006
41.9458	training	41.227	469.35	Cc1ccc(C)c(C(C)C)c1	0.718802
41.9458	training	41.485	472.15	Cc1cccc(C)c1C(C)C	0.460802
46.1153	training	48.423	485	CC(C)CCCC(C)C(C)O	2.30769
46.7549	training	47.908	485	CC(C)CCCCC(C)(C)O	1.1531
46.7549	training	47.908	485	CCCCC(C)CC(C)(C)O	1.1531
39.7931	training	39.669	412.15	CCC(C)C(C)(C)O	0.124111
39.9883	training	39.067	406.15	CC(C)CC(C)(C)O	0.921312
40.3795	training	40.472	420.15	CCC(C)(C)C(C)O	0.0925124
41.0644	training	41.531	426.15	CC(C)C(C)C(C)O	0.466633
40.5697	training	39.568	411.15	CC(O)CC(C)(C)C	1.00165
35.2496	training	35.417	403.75	CCC(C)(C)C(C)=O	0.167356
35.943	training	35.911	405.15	CC(=O)C(C)C(C)C	0.0320078
35.909	training	34.903	398.15	CC(=O)CC(C)(C)C	1.00605
31.8632	training	31.219	370.55	CCC(C)=C(C)C	0.644238
30.1168	training	29.937	356.45	CC(C)=CC(C)C	0.179755
29.7922	training	29.387	356.15	CC#CC(C)(C)C	0.405189
49.0185	training	47.755	540.15	Cc1ccc(C)c(-c2ccccc2)c1	1.2635
42.6956	training	42.664	480.75	CCCc1c(C)cccc1C	0.0316326
42.6956	training	42.357	477.45	CCCc1cc(C)ccc1C	0.338633
46.628	training	44.598	466	CC(C)C(C)(CO)C(C)(C)C	2.02997
40.7008	training	40.355	463.15	CCC(CC)(CC(C)C)C(C)C	0.345788
40.7008	training	41.31	473.15	CCC(C)C(CC)(CC)C(C)C	0.609212
38.5655	training	39.381	462.15	CCC(CC)(C(C)C)C(C)C	0.815477
38.4924	training	38.999	462.15	CCC(CC)(CC)C(C)(C)C	0.506632
40.7008	training	40.355	463.15	CCC(CC)C(CC)C(C)(C)C	0.345788
40.7008	training	41.693	477.15	CCC(CC)C(C)(CC)C(C)C	0.992212
40.7008	training	41.31	473.15	CCC(C(C)C)C(C)(CC)CC	0.609212
40.5668	training	40.355	463.15	CCC(C(C)C)C(CC)C(C)C	0.211817
40.8013	training	42.268	483.15	CCC(C)(CC)C(C)(CC)CC	1.46673
44.6123	test	45.163	461	CCC(CC)C(C)(C)CO	0.550662
43.363	validation	44.724	461	CCC(C(C)O)C(C)(C)C	1.361
42.9813	training	44.243	461	CCC(C)(CC)C(C)(C)O	1.26169
45.2732	training	44.424	460	CCC(O)(CC)CC(C)(C)C	0.849172
40.5437	training	41.884	479.15	CCC(C(C)C)(C(C)C)C(C)C	1.34026
42.5509	training	42.857	447.15	CCC(O)(CC)C(C)(C)C	0.306135
42.9984	training	43.718	451.05	CCC(O)(C(C)C)C(C)C	0.719644
34.6739	test	34.427	407.15	CCC1CCC(C)(C)C1	0.246883
38.8643	training	38.561	449.15	CCCC(C)(C)C(CC)CC	0.303307
38.9884	training	39.218	452.15	CCCC(C)C(CC)C(C)C	0.229631
38.8643	validation	39.371	458.15	CCCC(C)C(C)(CC)CC	0.506693
38.8643	training	38.921	453.15	CCC(C)CC(C)(CC)CC	0.0566928
38.9884	test	38.945	449.15	CCC(CCC(C)C)C(C)C	0.043369
38.9884	validation	38.945	449.15	CCC(C)CC(CC)C(C)C	0.043369
38.8643	test	38.921	453.15	CCCCC(C)(CC)C(C)C	0.0566928
38.8643	training	38.561	449.15	CCCCC(CC)C(C)(C)C	0.303307
51.7251	training	52.148	585.41	CCc1cc2c(C)cccc2cc1C	0.422924
41.0567	test	41.31	473.15	CCCCC(C)C(C)(CC)CC	0.253298
41.0567	training	40.928	469.15	CCCCCC(CC)C(C)(C)C	0.128702
41.0567	training	41.502	475.15	CCCCCC(C)(CC)C(C)C	0.445298
41.0567	training	41.215	472.15	CCC(C)CCC(C)(CC)CC	0.158298
41.0567	training	41.119	471.15	CCCCC(C)(C)C(CC)CC	0.0622977
41.0095	training	41.215	472.15	CCCC(C)C(C)C(CC)CC	0.205468
41.0095	training	40.737	467.15	CCCC(C)CC(CC)C(C)C	0.272532
41.0567	test	40.928	469.15	CCCC(C)CC(C)(CC)CC	0.128702
41.0095	training	41.024	470.15	CCC(C)CCC(CC)C(C)C	0.0144684
41.0095	training	41.024	470.15	CCCCC(C)C(CC)C(C)C	0.0144684
41.0095	training	40.928	469.15	CCC(CCCC(C)C)C(C)C	0.0815316
34.0928	training	34.369	406.99	CCC(CC)C(C)(C)C	0.276228
34.512	training	34.733	409.87	CCC(C(C)C)C(C)C	0.22103
34.0928	training	35.313	417.86	CCC(C)(CC)C(C)C	1.22023
48.4133	validation	48.271	515	CCc1c(C)ccc(O)c1C	0.142252
48.4133	training	46.804	500	CCc1cc(C)cc(O)c1C	1.60925
48.4133	validation	46.804	500	CCc1ccc(C)c(O)c1C	1.60925
43.6175	training	44.142	451	CCCCC(O)C(C)(C)C	0.524505
43.8673	validation	43.749	447.15	CCCCC(C)(O)C(C)C	0.118324
44.5861	validation	44.332	448.15	CC(C)CCC(O)C(C)C	0.254074
44.1343	training	44.04	450	CCC(C)CC(C)(O)CC	0.0942904
44.1343	training	44.45	446.15	CCC(C)(O)CCC(C)C	0.31571
42.9479	training	42.092	429	CCC(O)C(C)C(C)C	0.855949
42.8857	training	42.517	433.15	CCC(C)C(O)C(C)C	0.368687
42.9479	training	42.414	432.15	CC(C)CC(O)C(C)C	0.533949
41.6567	training	41.869	431.35	CCCC(C)(O)C(C)C	0.212305
42.3133	test	41.343	426.15	CCC(O)CC(C)(C)C	0.970326
41.8863	training	41.242	425.15	CCC(C)(O)CC(C)C	0.644257
42.0774	training	41.657	429.25	CCCC(O)C(C)(C)C	0.420408
42.0774	training	41.95	432.15	CCC(O)C(C)(C)CC	0.127408
41.6567	training	41.242	425.15	CCC(C)C(C)(O)CC	0.414695
46.8595	training	44.496	456	CC(C)C(CCO)C(C)(C)C	2.36351
45.2052	training	44.025	456	CC(C)C(C)(C(C)C)C(C)O	1.18022
44.9405	training	45.199	467.65	CC(C)C(O)(C(C)C)C(C)C	0.25849
41.9458	training	41.816	475.75	Cc1cccc(C(C)C)c1C	0.129802
40.5668	test	40.546	465.15	CCCC(C)C(C(C)C)C(C)C	0.0208174
40.7008	training	40.355	463.15	CCCCC(C(C)C)C(C)(C)C	0.345788
40.5668	training	40.355	463.15	CCC(C)CC(C(C)C)C(C)C	0.211817
40.5668	training	40.431	463.95	CC(C)CCC(C(C)C)C(C)C	0.135817
40.7008	training	41.406	474.15	CCCCC(C)(C(C)C)C(C)C	0.705212
38.606	training	38.508	448.15	CCC(C)C(C(C)C)C(C)C	0.0979728
38.5655	training	37.863	445.15	CCCC(C(C)C)C(C)(C)C	0.702523
38.5655	training	38.577	453.15	CCCC(C)(C(C)C)C(C)C	0.0114769
38.606	training	38.058	443.15	CC(C)CC(C(C)C)C(C)C	0.547973
36.4948	training	36.359	430.2	CC(C)C(C(C)C)C(C)C	0.135763
45.9689	training	46.568	467.15	CC(C)CCCC(O)C(C)C	0.599083
46.1412	training	45.569	462.25	CCCCCC(C)(O)C(C)C	0.572172
46.4534	test	45.954	466	CCCC(C)CC(C)(O)CC	0.499378
44.9361	training	46.057	467	CCCCCC(O)C(C)(C)C	1.12091
46.4534	training	46.278	469.15	CCC(C)(O)CCCC(C)C	0.175378
46.4534	test	45.867	465.15	CCC(C)CCC(C)(O)CC	0.586378
41.0088	training	40.089	411.95	CC(C)C(O)C(C)C	0.919846
40.2961	training	39.368	409.15	CCC(O)C(C)(C)C	0.928054
39.5926	training	39.769	413.15	CCC(C)(O)C(C)C	0.176414
34.3136	training	34.903	398.15	CCC(=O)C(C)(C)C	0.589388
35.1423	training	35.973	397.55	CC(C)C(=O)C(C)C	0.830739
45.088	training	44.613	457.15	CCCC(O)(C(C)C)C(C)C	0.474961
42.6956	training	42.952	483.85	CCCc1cccc(C)c1C	0.256367
40.7478	training	40.928	469.15	CCCC(C(C)(C)C)C(C)(C)C	0.180231
40.8013	validation	41.31	473.15	CCC(CC)(CC)CC(C)(C)C	0.508729
40.7008	training	41.693	477.15	CCC(CC)(CC)C(C)C(C)C	0.992212
40.8013	training	42.268	483.15	CCC(C)(C)C(CC)(CC)CC	1.46673
44.7685	training	44.918	460.15	CCC(CC)C(O)C(C)(C)C	0.149488
44.7685	test	44.903	460	CCC(C)(CC)C(O)C(C)C	0.134488
38.9884	training	39.4	454.15	CCC(C)C(CC)C(C)CC	0.411631
38.9884	training	39.218	452.15	CCCC(CC)C(C)C(C)C	0.229631
38.8643	training	38.021	443.15	CCCC(C)(CC)CC(C)C	0.843307
38.9884	training	38.854	448.15	CCC(C)C(CC)CC(C)C	0.134369
38.9884	training	38.4	443.15	CCC(CC(C)C)CC(C)C	0.588369
38.8643	training	38.921	453.15	CCCC(CC)C(C)(C)CC	0.0566928
38.8643	training	39.011	454.15	CCCC(C)(CC)C(C)CC	0.146693
38.8643	validation	37.841	441.15	CCCC(CC)CC(C)(C)C	1.02331
51.7251	training	52.148	585.41	CCc1cc(C)c(C)c2ccccc12	0.422924
41.0095	validation	40.546	465.15	CCCC(C)C(CC)CC(C)C	0.463532
41.0567	training	40.451	464.15	CCCCC(C)(CC)CC(C)C	0.605702
41.0095	training	40.355	463.15	CCC(C)CC(CC)CC(C)C	0.654532
41.0095	training	41.024	470.15	CCCCC(CC)C(C)C(C)C	0.0144684
41.0095	training	40.355	463.15	CCC(CCC(C)C)CC(C)C	0.654532
41.0095	training	40.928	469.15	CCC(C)CC(CC)C(C)CC	0.0815316
41.0567	training	41.31	473.15	CCCC(C)C(C)(CC)CCC	0.253298
41.0567	training	41.406	474.15	CCCCC(C)(CC)C(C)CC	0.349298
41.0095	training	41.024	470.15	CCCC(C)C(CC)C(C)CC	0.0144684
41.0567	training	40.069	460.15	CCCCC(CC)CC(C)(C)C	0.987702
41.0567	training	41.119	471.15	CCCCC(CC)C(C)(C)CC	0.0622977
48.4133	training	49.951	532.15	CCc1c(C)cc(O)cc1C	1.53775
48.4133	training	46.916	501.15	CCc1cc(C)c(O)c(C)c1	1.49725
48.4133	training	47.782	510	CCc1ccc(O)c(C)c1C	0.631252
48.4133	training	46.804	500	CCc1cc(C)c(O)cc1C	1.60925
43.9175	test	43.749	447.15	CCCC(O)CC(C)(C)C	0.168539
44.1343	test	43.484	444.55	CCCC(C)(O)CC(C)C	0.65029
43.6175	validation	43.953	449.15	CCCC(O)C(C)(C)CC	0.335505
44.4833	training	45.569	460.15	CCC(C)C(O)C(C)CC	1.08568
44.6937	training	45.659	451	CC(C)CC(O)CC(C)C	0.965343
41.9458	test	41.742	474.95	Cc1ccc(C(C)C)cc1C	0.203802
41.9458	training	41.494	472.25	Cc1ccc(C(C)C)c(C)c1	0.451802
40.5668	training	40.737	467.15	CCC(C)C(C(C)C)C(C)CC	0.170183
40.5668	training	40.546	465.15	CCCC(C(C)C)C(C)C(C)C	0.0208174
40.7008	training	40.546	465.15	CCCC(C)(CC(C)C)C(C)C	0.154788
40.5668	validation	40.26	462.15	CCC(C)C(CC(C)C)C(C)C	0.306817
40.7008	training	40.737	467.15	CCCC(C(C)C)C(C)(C)CC	0.0362122
40.5668	training	39.687	456.15	CC(C)CC(CC(C)C)C(C)C	0.879817
40.7008	training	41.406	474.15	CCCC(C)(C(C)C)C(C)CC	0.705212
40.7008	training	39.592	455.15	CCCC(CC(C)(C)C)C(C)C	1.10879
46.4534	training	45.748	464	CCCCC(C)(O)CC(C)C	0.705378
45.9689	training	46.241	464	CCCC(C)C(O)CC(C)C	0.272083
46.1153	training	45.75	468.15	CCC(C)CC(O)CC(C)C	0.365305
46.1412	training	45.748	464	CCCCC(C)(O)C(C)CC	0.393172
45.9689	validation	46.241	464	CCC(C)CC(O)C(C)CC	0.272083
46.4534	training	45.748	464	CCCC(C)(O)CC(C)CC	0.705378
46.4534	training	45.867	465.15	CCCC(C)(O)CCC(C)C	0.586378
45.3006	training	45.661	463.15	CCCCC(O)CC(C)(C)C	0.360363
46.1153	test	44.9	475.15	CC(C)CCC(O)CC(C)C	1.21531
49.0185	training	48.045	543.15	Cc1ccc(-c2ccccc2)c(C)c1	0.973501
42.6956	training	42.571	479.75	CCCc1ccc(C)cc1C	0.124633
42.6956	training	42.785	482.05	CCCc1ccc(C)c(C)c1	0.0893674
41.0567	training	40.928	469.15	CCCC(CCC)C(C)(C)CC	0.128702
41.0095	training	40.355	463.15	CCCC(CC(C)C)C(C)CC	0.654532
41.0095	training	40.737	467.15	CCCC(CCC)C(C)C(C)C	0.272532
41.0567	validation	39.783	457.15	CCCC(CCC)CC(C)(C)C	1.2737
41.0095	training	39.84	457.75	CCCC(CC(C)C)CC(C)C	1.16953
41.0567	training	41.119	471.15	CCCC(C)(CCC)C(C)CC	0.0622977
41.0095	training	40.928	469.15	CCCC(C(C)CC)C(C)CC	0.0815316
41.0567	training	40.26	462.15	CCCC(C)(CCC)CC(C)C	0.796702
38.8643	training	38.201	445.15	CCC(CC)CCC(C)(C)C	0.663307
38.9884	training	39.127	451.15	CCC(CC)CC(C)C(C)C	0.138631
38.9884	training	38.945	449.15	CCC(CC)C(C)CC(C)C	0.043369
38.8643	training	38.741	451.15	CCC(C)(CC)CCC(C)C	0.123307
38.8643	training	38.471	448.15	CCC(CC)CC(C)(C)CC	0.393307
38.9884	training	39.491	455.15	CCC(C)C(C)C(CC)CC	0.502631
51.7251	training	52.148	585.41	CCc1cccc2c(C)cc(C)cc12	0.422924
51.7251	training	52.148	585.41	CCc1cccc2c(C)ccc(C)c12	0.422924
41.0567	training	40.355	463.15	CCCC(C)(CC)CC(C)CC	0.701702
41.0567	validation	40.928	469.15	CCCC(CC)C(C)(C)CCC	0.128702
41.0567	training	40.451	464.15	CCCC(CC)CC(C)(C)CC	0.605702
41.0567	training	40.641	466.15	CCCC(C)(CC)CCC(C)C	0.415702
41.0567	training	40.26	462.15	CCCC(CC)CCC(C)(C)C	0.796702
41.0095	training	40.737	467.15	CCCC(CC)CC(C)C(C)C	0.272532
41.0095	validation	40.833	468.15	CCC(C)C(CC)CCC(C)C	0.176532
41.0095	training	40.641	466.15	CCCC(CC)C(C)CC(C)C	0.368532
41.0095	training	41.119	471.15	CCCC(CC)C(C)C(C)CC	0.109468
48.4133	test	48.286	515.15	CCc1cc(O)c(C)cc1C	0.127252
48.4133	training	48.286	515.15	CCc1cc(O)cc(C)c1C	0.127252
48.4133	training	47.782	510	CCc1cc(C)c(C)c(O)c1	0.631252
41.9458	test	41.071	467.65	Cc1cc(C)cc(C(C)C)c1	0.874802
49.0185	training	48.529	548.15	Cc1cc(C)cc(-c2ccccc2)c1	0.489501
42.6956	validation	42.166	475.39	CCCc1cc(C)cc(C)c1	0.529633
51.7251	validation	52.148	585.41	CCc1ccc2c(C)cc(C)cc2c1	0.422924
51.7251	training	52.148	585.41	CCc1ccc2c(C)ccc(C)c2c1	0.422924
41.0567	training	40.928	469.15	CCC(CC)CCC(C)(C)CC	0.128702
41.0095	training	40.546	465.15	CCC(CC)CC(C)CC(C)C	0.463532
41.0095	training	41.119	471.15	CCC(CC)CC(C)C(C)CC	0.109468
41.0567	training	40.451	464.15	CCCC(C)(C)CC(CC)CC	0.605702
41.0095	training	41.024	470.15	CCC(C)CC(C)C(CC)CC	0.0144684
41.0567	training	40.641	466.15	CCC(CC)CCCC(C)(C)C	0.415702
41.0095	training	41.024	470.15	CCC(CC)C(C)CCC(C)C	0.0144684
41.0567	training	41.119	471.15	CCC(C)(CC)CCCC(C)C	0.0622977
41.0095	training	41.215	472.15	CCC(CC)CCC(C)C(C)C	0.205468
48.4133	test	46.819	500.15	CCc1cc(C)cc(C)c1O	1.59425
48.4133	training	46.804	500	CCc1c(C)ccc(C)c1O	1.60925
48.4133	test	48.271	515	CCc1cc(C)c(C)cc1O	0.142252
48.4133	training	47.782	510	CCc1ccc(C)c(C)c1O	0.631252
51.7251	training	52.148	585.41	CCc1ccc2ccc(C)c(C)c2c1	0.422924
26.6073	training	26.43	300.13	CC#CC	0.177297
49.0185	training	47.368	536.15	Cc1cccc(C)c1-c1ccccc1	1.6505
49.0185	training	49.207	555.15	Cc1ccc(-c2ccccc2)cc1C	0.188499
49.0185	training	46.885	531.15	Cc1ccccc1-c1ccccc1C	2.1335
49.0185	training	48.82	551.15	Cc1cccc(-c2ccccc2)c1C	0.198501
49.0185	training	50.275	566.15	Cc1ccc(-c2ccc(C)cc2)cc1	1.2565
49.0185	training	49.304	556.15	Cc1ccc(-c2cccc(C)c2)cc1	0.285499
49.0185	validation	49.595	559.15	Cc1cccc(-c2cccc(C)c2)c1	0.576499
35.6467	training	34.28	386.15	CC(C)C(C)C=O	1.3667
32.7133	test	33.102	377.15	CCC(C)(C)C=O	0.388666
32.3601	training	33.102	377.15	CC(C)(C)CC=O	0.741948
27.6089	training	27.488	331.13	CC(C)C(C)C	0.120879
26.9384	validation	26.416	322.88	CCC(C)(C)C	0.522394
35.3207	training	35.222	417.15	CCC1C(C)CCC1C	0.098659
35.3207	training	35.931	425.15	CCC1C(C)CCC1C	0.610341
32.1414	test	31.857	380.05	CC=CCC(C)(C)C	0.284352
32.4913	validation	33.02	389.15	CC=C(C)C(C)CC	0.528677
32.4913	training	32.664	385.15	CC=C(C)CC(C)C	0.172677
32.7284	training	32.446	383.15	CC=CC(C)C(C)C	0.282393
32.1414	training	31.778	379.15	CC=CC(C)(C)CC	0.363352
30.1168	training	30.462	362.4	CC=C(C)C(C)C	0.345245
29.6147	training	29.423	353.58	CC=CC(C)(C)C	0.191707
35.3207	training	35.931	425.15	CCC1CCC(C)C1C	0.610341
35.3207	training	34.691	411.15	CCC1CCC(C)C1C	0.629659
34.024	training	33.596	395.15	CCC(C)=C(C)CC	0.428006
32.7284	training	31.736	375.15	CC(C)C=CC(C)C	0.992393
32.4913	training	32.397	382.15	CCC(C)=CC(C)C	0.0943231
32.4913	training	32.842	387.15	CCC=C(C)C(C)C	0.350677
32.1414	training	31.727	378.58	CCC=CC(C)(C)C	0.414352
35.3207	training	35.488	420.15	CCC1CC(C)C(C)C1	0.167341
35.3207	training	35.497	412	CCC1CC(C)CC1C	0.176341
35.3207	training	35.311	418.15	CCC1CC(C)CC1C	0.009659
35.3207	training	34.868	413.15	CCC1CC(C)C(C)C1	0.452659
43.4133	training	43.226	493.15	CC1CCCC2(C)CCCCC12	0.18732
28.4047	training	27.86	333.15	CC1CCC1C	0.54473
27.5585	validation	27.604	329.15	CC1(C)CCC1	0.0454916
28.4047	training	28.563	341.15	CC1CCC1C	0.15827
28.4047	training	27.904	333.65	CC1CC(C)C1	0.50073
28.4047	training	27.64	330.65	CC1CC(C)C1	0.76473
33.6899	training	33.14	397.47	CC1CCC(C)CC1	0.549936
34.3102	test	32.443	392.7	CC1(C)CCCCC1	1.86718
33.6899	training	33.541	402.94	CC1CCCCC1C	0.148936
33.6899	validation	32.865	396.58	CC1CCCCC1C	0.824936
33.6899	training	33.247	397.61	CC1CCCC(C)C1	0.442936
33.6899	training	32.477	392.51	CC1CCC(C)CC1	1.21294
33.6899	test	32.722	393.24	CC1CCCC(C)C1	0.967936
33.7374	validation	33.837	401.15	CC1=CCCC(C)C1	0.0995875
33.3823	training	33.216	398.15	CC1C=CC(C)CC1	0.166274
33.7374	training	33.757	400.25	CC1=CC(C)CCC1	0.0195875
33.7374	training	33.806	401.65	CC1=CCC(C)CC1	0.0685875
33.7374	training	34.112	404.25	CC1=CCCCC1C	0.374587
33.2918	test	33.142	392.15	CC1(C)C=CCCC1	0.149805
33.3823	training	33.364	395.8	CC1C=CCCC1C	0.0182738
33.3823	training	33.364	395.8	CC1C=CCCC1C	0.0182738
33.3823	test	33.247	397.65	CC1C=CCC(C)C1	0.135274
33.3823	training	33.364	395.8	CC1C=CCC(C)C1	0.0182738
35.2566	training	34.721	411.13	CC1=C(C)CCCC1	0.53556
33.3823	test	33.364	395.8	CC1C=CC(C)CC1	0.0182738
33.2918	validation	32.986	390.39	CC1(C)CC=CCC1	0.305805
33.3823	training	33.82	400.96	CC1CC=CCC1C	0.437726
33.3823	training	33.364	395.8	CC1CC=CCC1C	0.0182738
31.0379	training	31.712	372.68	CC1CCCC1C	0.674095
31.0379	training	30.755	363.92	CC1CCC(C)C1	0.282905
31.0379	training	31.37	364.88	CC1CCC(C)C1	0.332095
31.0379	training	31.196	365.02	CC1CCCC1C	0.158095
30.887	training	35.636	361	CC1(C)CCCC1	4.74903
33.2066	training	31.93	378.95	CC1=C(C)CCC1	1.27657
30.8476	training	30.658	364.55	CC1C=CC(C)C1	0.189644
30.8476	training	30.658	364.55	CC1C=CCC1C	0.189644
30.8476	training	30.658	364.55	CC1C=CCC1C	0.189644
30.8476	validation	30.658	364.55	CC1C=CC(C)C1	0.189644
29.8616	training	30.459	361.15	CC1(C)CC=CC1	0.597401
31.3617	training	30.711	365.15	CC1=CC(C)CC1	0.65072
31.3617	validation	30.817	366.35	CC1=CCC(C)C1	0.54472
29.8616	training	30.459	361.15	CC1(C)C=CCC1	0.597401
31.3617	training	31.595	375.15	CC1=CCCC1C	0.23328
24.476	training	24.557	293.78	CC1(C)CC1	0.0809827
26.0474	training	25.173	301.36	CC1CC1C	0.874428
26.0474	training	25.947	310.18	CC1CC1C	0.100428
41.6513	training	41.119	471.15	CCCCC(C)CC(C)CCC	0.532295
41.6513	validation	41.215	472.15	CCCC(C)CCC(C)CCC	0.436295
41.6654	training	41.024	470.15	CCCCCC(C)(C)CCCC	0.641436
41.6513	validation	41.693	477.15	CC(C)CCCCCCC(C)C	0.041705
41.6654	training	41.406	474.15	CCCCCCCCC(C)(C)C	0.259436
41.6513	training	41.884	479.15	CCCCCCCC(C)C(C)C	0.232705
41.6513	training	41.406	474.15	CCCCC(C)C(C)CCCC	0.245295
41.6513	training	41.119	471.15	CCCCCC(C)CCC(C)C	0.532295
41.6513	training	41.119	471.15	CCCCC(C)CCCC(C)C	0.532295
41.6513	training	41.31	473.15	CCCCCCC(C)CC(C)C	0.341295
41.6513	training	41.693	477.15	CCC(C)CCCCCC(C)C	0.041705
41.6513	test	41.502	475.15	CCCCCC(C)C(C)CCC	0.149295
41.6654	training	41.597	476.15	CCCCCCCC(C)(C)CC	0.0684363
41.6513	test	41.789	478.15	CCCCCCC(C)C(C)CC	0.137705
41.6513	training	41.31	473.15	CCCCCC(C)CC(C)CC	0.341295
41.6513	training	41.406	474.15	CCCCC(C)CCC(C)CC	0.245295
41.6513	training	41.502	475.15	CCCC(C)CCCC(C)CC	0.149295
41.6513	validation	41.789	478.15	CCC(C)CCCCC(C)CC	0.137705
41.6654	training	41.215	472.15	CCCCCCC(C)(C)CCC	0.450436
41.6513	training	41.502	475.15	CCCC(C)CCCCC(C)C	0.149295
49.9979	training	50.372	567.15	Cc1cc(C)cc(Cc2ccccc2)c1	0.374085
49.9979	training	50.663	570.15	Cc1cccc(Cc2ccccc2)c1C	0.665085
49.9979	training	50.566	569.15	Cc1ccc(Cc2ccccc2)c(C)c1	0.568085
49.9979	validation	50.469	568.15	Cc1ccc(C)c(Cc2ccccc2)c1	0.471085
49.9979	training	50.761	571.15	CC(C)(c1ccccc1)c1ccccc1	0.763085
49.9979	training	50.663	570.15	Cc1cccc(C)c1Cc1ccccc1	0.665085
45.6221	training	45.149	513.15	CCCCCCCCCCC(C)(C)C	0.473122
45.255	training	44.572	507.15	CCCCCCCCC(C)CC(C)C	0.68297
45.255	training	45.824	520.15	CCCCCCCCCC(C)C(C)C	0.56903
32.2606	training	32.309	367.65	Cc1ccoc1C	0.0484238
32.1871	training	32.171	366.15	Cc1ccc(C)o1	0.0160932
30.9977	training	30.84	351.67	Cc1cocc1C	0.157696
32.2606	training	32.355	368.15	Cc1coc(C)c1	0.0944238
52.8899	training	52.805	592.15	CCCCCCCCCCCCCCCC(C)(C)C	0.0849215
51.6588	training	51.733	581.15	CCCCCCCCCCCCCC(C)CC(C)C	0.0741687
51.6588	training	53.585	600.15	CCCCCCCCCCCCCCC(C)C(C)C	1.92617
35.0272	training	35.606	409.16	CCC(C)CCC(C)C	0.578823
35.0272	training	35.384	408.36	CC(C)CCCC(C)C	0.356823
35.0272	training	36.359	413.76	CCCC(C)C(C)CC	1.33182
35.0272	training	35.648	409.16	CCC(C)CC(C)CC	0.620823
35.0272	validation	36.108	413.66	CCCCC(C)C(C)C	1.08082
35.0272	training	35.355	406.05	CCCC(C)CC(C)C	0.327823
34.587	training	35.355	408.36	CCCC(C)(C)CCC	0.768013
34.587	training	35.043	405.84	CCCCCC(C)(C)C	0.456013
51.6899	training	51.441	578.15	CCCCCCCCCCCCCCC(C)(C)C	0.24894
50.6232	test	52.22	586.15	CCCCCCCCCCCCCC(C)C(C)C	1.59676
50.6232	training	50.469	568.15	CCCCCCCCCCCCC(C)CC(C)C	0.154238
32.5775	test	33.309	390.88	CCC(C)C(C)CC	0.731526
32.0278	training	32.639	385.12	CCCC(C)(C)CC	0.611245
32.5775	test	32.731	382.26	CC(C)CCC(C)C	0.153526
32.0278	training	32.366	379.99	CCCCC(C)(C)C	0.338245
32.5775	test	33.18	388.76	CCCC(C)C(C)C	0.602526
32.5775	test	32.475	382.58	CCC(C)CC(C)C	0.102474
48.2799	training	49.903	538.16	Cc1cccc2c(C)cccc12	1.62306
48.2799	training	48.818	536.15	Cc1ccc2ccc(C)cc2c1	0.538064
48.2799	training	48.752	535.15	Cc1ccc2cc(C)ccc2c1	0.472064
48.2799	training	50.179	541.16	Cc1cc2ccccc2cc1C	1.89906
48.2799	training	48.045	543.15	Cc1cccc2cccc(C)c12	0.234936
48.2799	validation	49.714	536.16	Cc1ccc2c(C)cccc2c1	1.43406
48.2799	training	50.116	540.46	Cc1ccc(C)c2ccccc12	1.83606
48.2799	training	49.919	538.36	Cc1cc(C)c2ccccc2c1	1.63906
48.2799	training	49.714	536.16	Cc1ccc2cccc(C)c2c1	1.43406
48.2799	validation	50.208	539.46	Cc1ccc2ccccc2c1C	1.92806
39.4425	training	39.089	451.15	CCCCCC(C)(C)CCC	0.353462
39.5948	training	39.573	452.15	CCCCC(C)CCC(C)C	0.021805
39.5948	training	40.123	458.15	CCCCCC(C)C(C)CC	0.528195
39.5948	training	39.664	453.15	CCCCC(C)CC(C)CC	0.069195
39.5948	test	39.848	455.15	CCCC(C)CCC(C)CC	0.253195
39.5948	validation	39.573	452.15	CCCC(C)CCCC(C)C	0.021805
39.4425	training	39.452	455.15	CCCCCCC(C)(C)CC	0.00953823
39.5948	training	40.031	457.15	CCC(C)CCCC(C)CC	0.436195
39.5948	test	39.481	451.15	CCCCCC(C)CC(C)C	0.113805
39.5948	training	40.215	459.15	CCCCCCC(C)C(C)C	0.620195
39.4425	training	39.27	453.15	CCCCCCCC(C)(C)C	0.172462
39.5948	training	39.848	455.15	CCCCC(C)C(C)CCC	0.253195
39.5948	training	39.573	452.15	CCCC(C)CC(C)CCC	0.021805
39.4425	training	38.998	450.15	CCCCC(C)(C)CCCC	0.444462
39.5948	training	39.664	453.15	CCC(C)CCCCC(C)C	0.069195
39.5948	test	39.939	456.15	CC(C)CCCCCC(C)C	0.344195
52.5986	training	53	594.15	CCCCCCCCCCCCCCC(C)CC(C)C	0.401401
52.5986	training	54.953	614.15	CCCCCCCCCCCCCCCC(C)C(C)C	2.3544
53.9889	training	54.171	606.15	CCCCCCCCCCCCCCCCC(C)(C)C	0.182107
37.0733	training	37.614	434.36	CCCCCC(C)(C)CC	0.540721
37.379	training	37.865	435.29	CCCC(C)C(C)CCC	0.486022
37.379	training	38.074	433.96	CCC(C)CCC(C)CC	0.695022
37.379	training	37.74	432.56	CCCC(C)CC(C)CC	0.361022
37.0733	training	37.238	430.66	CCCCC(C)(C)CCC	0.164721
37.379	training	38.033	436.56	CCCCC(C)C(C)CC	0.654022
37.379	training	38.242	433.03	CC(C)CCCCC(C)C	0.863022
37.379	training	38.2	433.54	CCC(C)CCCC(C)C	0.821022
37.379	training	37.823	431.66	CCCC(C)CCC(C)C	0.444022
37.379	training	38.2	437.47	CCCCCC(C)C(C)C	0.821022
37.0733	training	37.152	430.05	CCCCCCC(C)(C)C	0.078721
37.379	training	37.823	429.06	CCCCC(C)CC(C)C	0.444022
49.4791	training	50.761	571.15	CCCCCCCCCCCCC(C)C(C)C	1.28185
49.4791	training	49.111	554.15	CCCCCCCCCCCC(C)CC(C)C	0.36815
50.3765	training	49.984	563.15	CCCCCCCCCCCCCC(C)(C)C	0.392471
29.4545	test	29.737	359.21	CCC(C)(C)CC	0.282496
29.4545	training	29.262	352.34	CCCC(C)(C)C	0.192504
30.0828	training	29.796	353.64	CC(C)CC(C)C	0.286781
30.0828	training	30.492	362.93	CCC(C)C(C)C	0.409219
30.2418	training	30.183	347.15	CC(C)(C)C=O	0.0588031
43.3271	training	41.085	436.95	CC(C)(C)C(=O)O	2.24214
37.3565	training	35.561	401.65	CC(=O)OC(C)C(C)C	1.79554
45.4156	training	46.815	462.66	CCCC(=O)OC(C)C(C)C	1.39938
45.2769	training	47.111	460.31	CCCC(=O)OC(C)(C)CC	1.83413
42.5966	training	45.741	460.31	CCCC(=O)OCC(C)(C)C	3.1444
34.5798	training	33.771	390.97	CC(C)(C)COC=O	0.808771
34.6482	training	34.794	393.32	CC(C)C(C)OC=O	0.145794
32.9799	test	33.488	385.65	CCC(C)(C)OC=O	0.508134
41.8188	validation	42.772	437.43	CCC(=O)OC(C)(C)CC	0.95316
42.5806	training	42.797	439.78	CCC(=O)OC(C)C(C)C	0.216375
40.045	training	41.622	437.43	CCC(=O)OCC(C)(C)C	1.577
41.0582	training	41.744	475.26	C=Cc1ccc(C)cc1C	0.685805
41.0582	training	40.853	465.57	C=Cc1cccc(C)c1C	0.205195
41.0582	training	40.853	465.57	C=Cc1c(C)cccc1C	0.205195
41.0582	training	40.853	465.57	C=Cc1cc(C)cc(C)c1	0.205195
41.0582	training	40.909	466.18	C=Cc1cc(C)ccc1C	0.149195
41.0582	training	40.853	465.57	C=Cc1ccc(C)c(C)c1	0.205195
48.9361	training	48.432	547.15	CCCCCCCCCCCCC(C)(C)C	0.504144
48.2127	training	47.658	539.15	CCCCCCCCCCC(C)CC(C)C	0.554658
48.2127	training	49.207	555.15	CCCCCCCCCCCC(C)C(C)C	0.994342
32.0824	training	31.97	372.15	CC1(C)CCOC1	0.112379
32.673	training	32.713	381.65	CC1COCC1C	0.0400344
31.5155	training	31.357	365.35	CC1(C)CCCO1	0.15853
31.8506	training	31.666	370	CC1CCOC1C	0.184578
31.8506	training	31.734	370.75	CC1COC(C)C1	0.116578
31.5623	training	31.276	365.65	CC1CCC(C)O1	0.286265
35.3207	training	34.602	410.15	CCC1C(C)CCC1C	0.718659
32.4913	training	33.02	389.15	CC=C(C)C(C)CC	0.528677
32.7284	training	32.446	383.15	CC=CC(C)C(C)C	0.282393
32.1414	validation	31.778	379.15	CC=CC(C)(C)CC	0.363352
32.4913	training	32.664	385.15	CC=C(C)CC(C)C	0.172677
32.1414	test	31.61	377.25	CC=CCC(C)(C)C	0.531352
29.6147	training	29.04	349.89	CC=CC(C)(C)C	0.574707
30.1168	training	30.66	364.65	CC=C(C)C(C)C	0.543245
35.3207	validation	35.311	418.15	CCC1CCC(C)C1C	0.009659
35.3207	training	35.311	418.15	CCC1CCC(C)C1C	0.009659
32.1414	training	31.325	374	CCC=CC(C)(C)C	0.816352
32.4913	training	32.273	380.75	CCC(C)=CC(C)C	0.218323
32.7284	training	31.736	375.15	CC(C)C=CC(C)C	0.992393
32.4913	validation	32.842	387.15	CCC=C(C)C(C)C	0.350677
34.024	training	33.596	395.15	CCC(C)=C(C)CC	0.428006
35.3207	training	35.488	420.15	CCC1CC(C)C(C)C1	0.167341
35.3207	test	34.602	410.15	CCC1CC(C)CC1C	0.718659
35.3207	validation	35.311	418.15	CCC1CC(C)CC1C	0.009659
43.4133	validation	42.555	486.15	CC1CCCC2(C)CCCCC12	0.85832
46.8093	training	47.561	538.15	CCCCCCCCCCC(C)C(C)C	0.751743
47.3555	training	46.788	530.15	CCCCCCCCCCCC(C)(C)C	0.567472
46.8093	validation	46.209	524.15	CCCCCCCCCC(C)CC(C)C	0.600257
43.5381	training	42.843	489.15	CCCCCCCC(C)CC(C)C	0.695052
43.7268	training	43.322	494.15	CCCCCCCCCC(C)(C)C	0.404755
43.5381	training	43.995	501.15	CCCCCCCCC(C)C(C)C	0.456948
46.7549	test	47.908	485	CCC(C)CCCC(C)(C)O	1.1531
53.5686	training	52.693	591	CCCCCCCCCOCCCCCCCCC	0.875574
74.7511	test	73.966	722	CCCCCCCCCc1cccc(O)c1CCCCCCCCC	0.78507
51.6662	training	56.722	559.65	CCCCCCCCOCCCCCCCC	5.05579
66.1482	validation	66.13	657.15	CCCCCCCCOC(=O)c1ccccc1C(=O)OCCCCCCCC	0.0182034
35.7279	training	34.3	374.47	C1COCCO1	1.42785
41.9225	test	41.67	459.9	CCCCCOCCCCC	0.252492
46.9306	training	46.87	531.46	c1ccc(Oc2ccccc2)cc1	0.0605888
51.5079	training	50.44	567.85	CCC=C(c1ccccc1)c1ccccc1	1.06788
58.0657	training	58.973	655.15	CCCCCCCCC=C(c1ccccc1)c1ccccc1	0.90733
60.3712	training	61.14	677.15	CCCCCCCCCCC=C(c1ccccc1)c1ccccc1	0.768776
54.9914	training	54.855	613.15	CCCCCC=C(c1ccccc1)c1ccccc1	0.136413
65.872	test	64.697	713.15	CCCCCCCCCCCCCCC=C(c1ccccc1)c1ccccc1	1.17499
53.943	test	53.078	594.95	CCCCC=C(c1ccccc1)c1ccccc1	0.865046
57.0132	test	57.696	642.15	CCCCCCCC=C(c1ccccc1)c1ccccc1	0.682834
55.9998	test	56.421	629.15	CCCCCCC=C(c1ccccc1)c1ccccc1	0.421156
64.4023	training	63.905	705.15	CCCCCCCCCCCCCC=C(c1ccccc1)c1ccccc1	0.497335
52.8013	training	51.807	581.91	CCCC=C(c1ccccc1)c1ccccc1	0.994315
50.005	training	49.886	562.15	CC=C(c1ccccc1)c1ccccc1	0.119
62.988	training	63.015	696.15	CCCCCCCCCCCCC=C(c1ccccc1)c1ccccc1	0.0270316
61.6414	training	62.126	687.15	CCCCCCCCCCCC=C(c1ccccc1)c1ccccc1	0.484622
59.1807	training	60.056	666.15	CCCCCCCCCC=C(c1ccccc1)c1ccccc1	0.875319
50.938	training	50.945	573	C(#Cc1ccccc1)c1ccccc1	0.00701488
51.7982	training	49.43	557.44	CCCC(c1ccccc1)c1ccccc1	2.36817
57.6953	test	56.911	634.15	CCCCCCCCCC(c1ccccc1)c1ccccc1	0.784251
59.2106	training	59.367	659.15	CCCCCCCCCCCC(c1ccccc1)c1ccccc1	0.156445
48.5961	validation	50.403	545.78	CC(c1ccccc1)c1ccccc1	1.80686
50.4173	training	50.938	553.65	c1ccc(CCc2ccccc2)cc1	0.520715
49.4204	validation	48.733	550.25	C=C(c1ccccc1)c1ccccc1	0.68736
55.1843	test	54.269	607.15	CCCCCCC(c1ccccc1)c1ccccc1	0.915275
62.138	training	62.521	691.15	CCCCCCCCCCCCCCCC(c1ccccc1)c1ccccc1	0.383049
54.1968	test	53.003	594.18	CCCCCC(c1ccccc1)c1ccccc1	1.19375
48.4047	training	49.941	537.42	c1ccc(Cc2ccccc2)cc1	1.53632
56.907	training	56.519	630.15	CCCCCCCCC(c1ccccc1)c1ccccc1	0.387976
56.0778	validation	55.442	619.15	CCCCCCCC(c1ccccc1)c1ccccc1	0.635789
61.4204	training	61.83	684.15	CCCCCCCCCCCCCCC(c1ccccc1)c1ccccc1	0.409563
53.0805	training	51.723	581.04	CCCCC(c1ccccc1)c1ccccc1	1.3575
50.3135	test	49.326	556.37	CCC(c1ccccc1)c1ccccc1	0.987518
50.3135	training	49.368	556.81	CC(Cc1ccccc1)c1ccccc1	0.945518
52.1757	validation	50.829	571.85	c1ccc(CCCc2ccccc2)cc1	1.34668
49.017	training	49.129	554.34	CC(C)(c1ccccc1)c1ccccc1	0.112004
60.6912	training	61.041	676.15	CCCCCCCCCCCCCC(c1ccccc1)c1ccccc1	0.349826
59.954	training	60.253	668.15	CCCCCCCCCCCCC(c1ccccc1)c1ccccc1	0.299023
58.4595	training	58.482	650.15	CCCCCCCCCCC(c1ccccc1)c1ccccc1	0.0224932
31.9587	training	32.206	362.79	CCCOCCC	0.247314
62.2254	test	62.209	504.95	CC(O)COC(C)CO	0.0163913
34.2567	training	34.297	394.2	CCC(C)OC(C)CC	0.0402663
33.5933	training	33.576	384.15	CC(C)(C)OOC(C)(C)C	0.0172533
32.6892	validation	32.187	380.4	CC(C)(C)OC(C)(C)C	0.502221
53.8653	training	52.724	538	Cc1cc(C(C)(C)C)c(O)c(C(C)(C)C)c1	1.14128
27.3419	training	26.759	301.45	C=COC=C	0.582858
39.3551	test	41.949	472.65	C=Cc1cccc(C=C)c1	2.59389
57.2709	training	57.402	496.94	CC(CO)C(C)CO	0.13109
51.372	training	51.742	453.85	CC(O)C(C)O	0.369996
57.7118	training	59.008	508.21	CC(CO)CC(C)CO	1.29623
54.8556	training	54.413	474.15	CC(O)CC(C)O	0.44261
41.2216	training	39.141	449.65	C=C(C)C1CC=C(C)CC1	2.08059
58.2389	training	57.657	641.75	CCCCCCCCCCCCCCCCCCCCCC	0.581921
57.8539	training	57.5	640.15	C=CCCCCCCCCCCCCCCCCCCCC	0.353899
64.9291	training	64.499	711.15	CCCCCCCCCCCCCCCCCCCCCCc1ccccc1	0.43012
64.3726	test	64.796	714.15	CCCCCCCCCCCCCCCCCCCCCCC1CCCCC1	0.4234
63.7957	test	63.708	703.15	CCCCCCCCCCCCCCCCCCCCCCC1CCCC1	0.0877316
58.5566	training	57.402	639.15	C#CCCCCCCCCCCCCCCCCCCCC	1.15461
49.1009	training	50.347	523.15	CCCCCCCCCCCC=O	1.24612
43.693	training	44.343	489.47	CCCCCCCCCCCC	0.649982
61.9633	training	54.855	613.15	CCCCCCCCC(O)CCCO	7.10831
60.6741	training	53.585	600.15	OCCCCCCCCCCCCO	7.08913
59.2648	validation	51.733	581.15	CCCCCCCCCCC(O)CO	7.53177
59.9219	test	52.805	592.15	CCCCCCCCCC(O)CCO	7.11695
60.5024	training	62.19	571.85	CCCCCCCCCCCC(=O)O	1.68764
54.9826	training	47.786	535	CCCCCCCCCCCCO	7.19663
50.0712	validation	46.306	525.15	CCCCCCCCCCC(C)O	3.76516
47.0082	test	45.795	519.85	CCCCCCCCCCC(C)=O	1.21325
44.4213	training	43.704	486.5	C=CCCCCCCCCCC	0.717305
51.352	training	56.47	538.15	CCCCCCCCCCCCOC(C)=O	5.11801
55.549	training	55.887	623.7	CCCCCCCCCCCCOC(=O)CCC	0.337998
49.9054	training	49.131	554.36	CCCCCCCCCCCCOC=O	0.774419
53.4664	test	53.65	600.82	CCCCCCCCCCCCOC(=O)CC	0.183606
54.631	training	56.796	600.76	CCCCCCCCCCCCc1ccccc1	2.16505
53.8433	test	53.555	600.86	CCCCCCCCCCCCC1CCCCC1	0.288293
52.4472	test	52.593	584.06	CCCCCCCCCCCCC1CCCC1	0.145804
50.3923	training	50.761	571.15	CCCCCCCCCCCCC1=CCCC1	0.36865
60.5128	training	61.041	676.15	CCCCCCCCCCCCc1cccc2ccccc12	0.528231
60.5128	training	61.633	682.15	CCCCCCCCCCCCc1ccc2ccccc2c1	1.12023
43.618	test	43.169	492.55	CCC#CCCCCCCCC	0.44901
43.618	training	43.802	499.15	CC#CCCCCCCCCC	0.18399
44.9434	validation	44.384	488.16	C#CCCCCCCCCCC	0.559392
83.2394	validation	83.506	901.15	CCCCCCCCCCCCCCCCCCCCCCCCCCCCCCCCCCCCCCCCCCCCCCCCCCCCCCCCCCCCCC	0.266588
67.6263	training	67.375	740.15	CCCCCCCCCCCCCCCCCCCCCCCCCCCCCCCC	0.251287
67.4683	training	67.177	738.15	C=CCCCCCCCCCCCCCCCCCCCCCCCCCCCCCC	0.291315
71.6035	test	71.657	783.15	CCCCCCCCCCCCCCCCCCCCCCCCCCCCCCCCc1ccccc1	0.0535191
72.0754	training	72.157	788.15	CCCCCCCCCCCCCCCCCCCCCCCCCCCCCCCCC1CCCCC1	0.0816178
71.6592	training	71.358	780.15	CCCCCCCCCCCCCCCCCCCCCCCCCCCCCCCCC1CCCC1	0.301191
66.7499	training	66.978	736.15	C#CCCCCCCCCCCCCCCCCCCCCCCCCCCCCCC	0.228111
56.7668	training	56.911	634.15	CCCCCCCCCCCCCCCCCCCC=O	0.144154
55.8755	training	59.015	616.93	CCCCCCCCCCCCCCCCCCCC	3.13954
63.5728	training	64.598	712.15	OCCCCCCCCCCCCCCCCCCCCO	1.02525
61.9005	training	62.719	693.15	CCCCCCCCCCCCCCCCCCC(O)CO	0.818453
64.69	training	65.887	725.15	CCCCCCCCCCCCCCCCC(O)CCCO	1.19702
62.9331	test	63.806	704.15	CCCCCCCCCCCCCCCCCC(O)CCO	0.872933
63.8295	training	60.45	670.15	CCCCCCCCCCCCCCCCCCCC(=O)O	3.37951
57.0802	training	57.402	639.15	CCCCCCCCCCCCCCCCCCC(C)O	0.321834
67.8051	validation	64.799	629.15	CCCCCCCCCCCCCCCCCCCCO	3.00609
56.4908	validation	56.015	625	CCCCCCCCCCCCCCCCCCC(C)=O	0.475781
55.6393	validation	57.532	615.54	C=CCCCCCCCCCCCCCCCCCC	1.8927
69.9026	validation	120.791	650	CCCCCCCCCCCCCCCCCCCCOC(C)=O	50.8884
73.0921	training	74.015	806.74	CCCCCCCCCCCCCCCCCCCCOC(=O)CCC	0.922923
66.9204	training	67.102	737.4	CCCCCCCCCCCCCCCCCCCCOC=O	0.18159
70.8428	training	71.728	783.86	CCCCCCCCCCCCCCCCCCCCOC(=O)CC	0.885195
63.1228	training	62.719	693.15	CCCCCCCCCCCCCCCCCCCCc1ccccc1	0.403848
62.5946	training	62.917	695.15	CCCCCCCCCCCCCCCCCCCCC1CCCCC1	0.322427
61.9267	training	61.732	683.15	CCCCCCCCCCCCCCCCCCCCC1CCCC1	0.194724
55.2623	training	56.029	625.15	CC#CCCCCCCCCCCCCCCCCC	0.766731
55.2623	training	53.878	603.15	CCC#CCCCCCCCCCCCCCCCC	1.38427
56.7221	training	58.526	613.16	C#CCCCCCCCCCCCCCCCCCC	1.80395
29.2885	training	29.169	336.57	CCC1CO1	0.119481
45.6814	training	44.21	514	O=C1CCCCCO1	1.47145
19.4082	training	14.689	184.55	CC	4.71917
41.0582	training	40.853	465.57	C=Cc1ccc(C)c(C)c1	0.205195
41.0582	training	40.853	465.57	C=Cc1c(C)cccc1C	0.205195
41.0582	training	40.909	466.18	C=Cc1cc(C)ccc1C	0.149195
41.0582	training	41.744	475.26	C=Cc1ccc(C)cc1C	0.685805
41.0582	training	40.853	465.57	C=Cc1cc(C)cc(C)c1	0.205195
40.3487	training	40.582	408.15	CCOCCO	0.233343
46.4277	training	46.729	475.15	CCOCCOCCO	0.301253
39.6812	validation	40.384	429.45	CCOCCOC(C)=O	0.702788
33.6966	training	32.231	350.21	CCOC(C)=O	1.4656
33.5977	training	33.725	372.65	C=CC(=O)OCC	0.127311
38.0159	training	39.4	351.44	CCO	1.38406
45.0022	training	44.642	486.55	CCOC(=O)c1ccccc1	0.360176
35.4593	training	35.109	394.65	CCCC(=O)OCC	0.350262
31.8466	training	31.593	365.35	CCCCOCC	0.253579
48.3318	training	48.277	466.95	CCC(CC)C(=O)O	0.0548125
31.5565	training	29.786	327.46	CCOC=O	1.77048
34.6487	training	34.238	383	CCOC(=O)C(C)C	0.410664
31.6101	validation	30.607	354.25	CCOCC(C)C	1.00313
28.4063	training	27.904	326.15	CCOC(C)C	0.502328
34.2582	training	33.843	386.55	CCC(=O)C(C)C	0.415227
36.6939	test	36.614	407.45	CCOC(=O)CC(C)C	0.0798837
47.7762	training	47.155	427.65	CCOC(=O)C(C)O	0.621203
35.533	validation	34.376	390.15	C=C(C)C(=O)OCC	1.15704
33.9616	training	33.455	372.25	CCOC(=O)CC	0.506563
29.2562	training	35.522	337.01	CCCOCC	6.26579
30.9412	training	30.616	354.35	CCOC(C)CC	0.325199
29.6793	training	29.292	345.95	CCOC(C)(C)C	0.387344
69.1043	training	69.051	567	CCOc1cc(C=O)ccc1O	0.0532894
26.1123	validation	26.877	308.7	C=COCC	0.764668
45.2376	training	47.078	533.15	CCC1CCCC2CCCCC12	1.8404
44.9865	training	45.108	512.72	CCC1CCCc2ccccc21	0.121503
44.9865	validation	45.399	515.75	CCC1CCc2ccccc2C1	0.412503
55.8909	training	53.926	473.15	CCC(O)(CC)CO	1.96486
29.2175	training	29.277	348.15	C=CC(=C)CC	0.0595344
56.1406	training	55.376	480	CCC(CO)C(C)O	0.764586
57.2705	test	57.658	497.74	CCC(O)C(CC)CO	0.387541
57.4361	training	54.456	475.2	CCC(CO)CO	2.9801
58.5339	validation	55.376	480	CCC(CO)CCO	3.15787
58.9764	training	56.831	485.43	CCC(CO)CCCO	2.14536
42.8395	training	43.205	419.65	CCC(CC)CO	0.365458
28.3721	training	28.348	337.82	C=C(CC)CC	0.0241077
48.7986	training	48.574	480.15	CCCCC(CC)CCO	0.224578
48.2265	training	47.716	472	CCCCCC(CC)CO	0.510486
48.7986	training	47.716	472	CCC(CC)CCCCO	1.08258
47.1682	training	45.442	453	CCCC(CC)CCO	1.72622
46.6203	training	50.804	457.75	CCCCC(CC)CO	4.18371
47.1682	training	45.442	453	CCC(CC)CCCO	1.72622
34.038	training	34.113	393.15	C=C(CC)CCCC	0.0749858
33.4055	training	32.846	383.45	C=CC(CC)CCC	0.559501
33.4055	training	32.819	383.15	C=CCC(CC)CC	0.586501
49.6871	training	49.039	482	CCCCCCC(CC)CO	0.648099
50.2803	validation	49.039	482	CCCCCC(CC)CCO	1.24134
45.3523	training	43.718	439.15	CCC(CC)CCO	1.63429
44.8308	training	43.718	439.15	CCCC(CC)CO	1.11284
30.6422	validation	30.675	357.26	C=CC(CC)CC	0.0327996
31.2536	training	31.328	367.15	C=C(CC)CCC	0.0744216
30.2247	training	30.173	357.15	C#CC(CC)CC	0.0517305
36.0617	training	36.484	442.66	CCC(C)(CC)C(C)(C)C	0.422263
36.2944	test	36.15	428.46	CCC(C(C)C)C(C)(C)C	0.144357
36.5294	training	36.233	420.16	CCC(CC)CC(C)(C)C	0.296423
36.5294	training	36.694	429.26	CCCC(CC)C(C)(C)C	0.164577
36.2944	training	37.028	442.6	CCC(C)(C(C)C)C(C)C	0.733643
36.811	test	37.238	434.06	CCC(CC)C(C)C(C)C	0.427034
36.5294	training	37.196	436.86	CCCC(C)(CC)C(C)C	0.666577
56.7598	validation	54.44	480	CCC(O)(CC)C(C)O	2.31975
36.5294	training	37.07	434.26	CCC(C)(CC)CC(C)C	0.540577
36.811	validation	37.154	433.26	CCC(C)C(CC)C(C)C	0.343034
59.5588	training	55.141	480.65	CCC(C(C)O)C(C)O	4.41781
36.811	training	36.819	427.26	CCC(CC(C)C)C(C)C	0.00803368
45.7072	training	45.481	455	CCCCC(CC)C(C)O	0.226156
45.0435	training	44.988	455	CCCCCC(C)(O)CC	0.0555425
44.2176	validation	43.767	441.15	CCCC(CC)C(C)O	0.450645
44.4349	training	43.752	441	CCC(CC)CC(C)O	0.682945
41.1528	training	40.717	463.15	CCc1ccccc1C(C)C	0.435813
37.379	training	37.363	429.36	CCCC(CC)CC(C)C	0.015978
37.379	test	37.74	432.86	CCC(CC)CCC(C)C	0.361022
37.379	training	37.74	434.36	CCCCC(CC)C(C)C	0.361022
35.0272	training	35.982	411.16	CCCC(CC)C(C)C	0.954823
35.0272	test	35.648	406.96	CCC(CC)CC(C)C	0.620823
32.5775	training	32.966	388.81	CCC(CC)C(C)C	0.388526
42.4352	training	41.845	425.15	CCC(CC)C(C)O	0.590245
36.8223	training	36.809	411.15	CCC(CC)C(C)=O	0.0132905
31.1438	test	31.335	369.16	CC=C(CC)CC	0.191158
42.2807	validation	42.3	476.15	CCCc1ccccc1CC	0.0192736
36.5294	training	37.112	436.06	CCC(CC)C(C)(C)CC	0.582577
36.5294	training	36.987	435.26	CCC(C)C(C)(CC)CC	0.457577
40.5919	training	42.563	438.15	CCOCCC(=O)OCC	1.97106
44.7171	training	45.024	455.35	CCCCC(O)(CC)CC	0.306918
42.4228	validation	42.367	432.15	CCCC(O)(CC)CC	0.0557754
44.006	training	43.354	437.15	CCC(O)C(CC)CC	0.651995
33.6105	training	33.317	389.15	CCC=C(CC)CC	0.293467
41.1528	training	40.902	465.15	CCc1cccc(C(C)C)c1	0.250813
37.379	training	37.656	435.36	CCCC(CC)C(C)CC	0.277022
37.0733	training	37.53	436.96	CCCCC(C)(CC)CC	0.456721
34.587	training	35.731	413.76	CCCC(C)(CC)CC	1.14401
46.9377	training	47.525	472	CCC(O)CCC(CC)CC	0.587313
47.0439	training	47.035	472.15	CCCCCC(O)(CC)CC	0.00890405
40.2363	training	40.42	415.65	CCC(O)(CC)CC	0.183726
42.2807	training	42.114	474.15	CCCc1cccc(CC)c1	0.166726
44.7171	test	44.695	452.15	CCCC(O)(CC)CCC	0.0220821
41.1528	training	41.325	469.75	CCc1ccc(C(C)C)cc1	0.172187
41.0567	training	41.31	473.15	CCCC(CC)(CCC)C(C)C	0.253298
41.0095	training	40.833	468.15	CCCC(C(C)C)C(CC)CC	0.176532
37.379	validation	37.74	436.16	CCCC(C)C(CC)CC	0.361022
37.0733	training	37.321	433.96	CCCC(C)(CC)CCC	0.247721
35.0272	training	36.401	413.56	CCC(C)C(CC)CC	1.37382
46.6644	training	46.896	466	CCCCC(O)C(CC)CC	0.231581
47.0439	validation	46.397	466	CCCCC(O)(CC)CCC	0.646904
42.2807	training	42.486	478.15	CCCc1ccc(CC)cc1	0.205274
41.6654	training	41.024	470.15	CCCC(CC)(CCC)CCC	0.641436
41.6513	training	40.928	469.15	CCCC(CCC)C(CC)CC	0.723295
37.379	training	37.698	431.36	CCC(C)CC(CC)CC	0.319022
24.5928	training	24.522	281.22	C#CCC	0.0707601
36.0614	training	35.915	409.35	CCc1ccccc1	0.146433
49.4149	training	49.304	556.15	CCc1ccc(-c2ccccc2)cc1	0.110942
49.4149	training	47.655	539.12	CCc1ccccc1-c1ccccc1	1.75994
49.4149	training	49.592	559.11	CCc1cccc(-c2ccccc2)c1	0.177058
35.5307	training	34.957	389.95	CCC(C=O)CC	0.573733
33.6105	training	33.766	394.15	CC=C(CC)CCC	0.155533
33.0664	validation	33.007	386.15	CC=CC(CC)CC	0.0593597
44.0487	training	44.475	506.15	CCC12CCCCC1CCCC2	0.426262
45.2376	training	44.668	508.15	CCC1CCC2CCCCC2C1	0.569603
28.5639	training	29.123	343.75	CCC1CCC1	0.559085
34.4986	test	34.163	404.95	CCC1CCCCC1	0.335589
34.2151	training	34.544	404.76	CCC1C=CCCC1	0.328937
34.2151	validation	34.669	406.15	CCC1CC=CCC1	0.453937
34.919	training	35.026	410.14	CCC1=CCCCC1	0.107042
31.5533	training	32.246	376.62	CCC1CCCC1	0.692692
31.1899	training	31.579	370.92	CCC1C=CCC1	0.389126
31.1899	training	31.618	371.36	CCC1CC=CC1	0.428126
32.2239	training	32.343	379.48	CCC1=CCCC1	0.119058
25.705	validation	26.106	309.08	CCC1CC1	0.400961
42.534	training	41.693	477.15	CCCCCCC(CC)CCC	0.840951
42.534	training	42.143	481.85	CCCCCCCC(CC)CC	0.390951
42.534	training	41.502	475.15	CCCCCC(CC)CCCC	1.03195
50.7941	training	50.133	564.69	CCc1cccc(Cc2ccccc2)c1	0.661062
50.7941	training	50.067	564.01	CCc1ccccc1Cc1ccccc1	0.727062
50.7941	training	50.666	570.18	CCc1ccc(Cc2ccccc2)cc1	0.128062
14.6578	training	13.463	169.47	C=C	1.19482
51.6714	training	51.676	511.15	O=C1OCCO1	0.00456861
55.4136	training	52.495	470.45	OCCO	2.9186
45.5584	training	45.368	463.65	CC(=O)OCCOC(C)=O	0.190355
43.0509	training	41.96	424.5	CCCOCCO	1.09092
25.7453	training	25.697	283.85	C1CO1	0.0482986
31.8002	training	32.121	365	CCc1ccoc1	0.320775
32.0734	training	32.18	365.65	CCc1ccco1	0.106616
35.8918	validation	36.652	414.36	CCCC(CC)CCC	0.760213
35.8918	training	36.106	416.35	CCCCC(CC)CC	0.214213
40.8733	validation	40.653	433.8	CCCCC(C=O)CC	0.220302
33.406	training	33.689	391.69	CCCC(CC)CC	0.283024
43.2268	test	43.611	471.75	CCCCC(CC)COC(C)=O	0.384156
47.926	training	45.61	489.15	C=CC(=O)OCC(CC)CCCC	2.31604
46.7334	training	46.86	442.15	CC(=O)OC(C)OC(C)=O	0.126571
41.0873	training	40.727	456.93	CCc1cc(C)cc(C)c1	0.360319
41.0873	training	40.952	461.59	CCc1ccc(C)cc1C	0.135319
41.0873	training	41.795	463.19	CCc1c(C)cccc1C	0.707681
47.5427	test	48.116	531.49	CCc1ccc2ccccc2c1	0.573345
47.5427	training	48.015	531.48	CCc1cccc2ccccc12	0.472345
40.4744	training	40.025	453.15	CCCCC(CC)CCCC	0.449404
40.4744	training	40.395	457.15	CCCCCC(CC)CCC	0.0794041
40.4744	training	40.765	461.15	CCCCCCC(CC)CC	0.290596
38.2564	training	38.907	436.8	CCCCC(CC)CCC	0.650602
38.2564	training	39.244	439.66	CCCCCC(CC)CC	0.987602
41.0873	validation	41.702	462.93	CCc1ccc(C)c(C)c1	0.614681
41.0873	training	41.636	467.11	CCc1cccc(C)c1C	0.548681
30.8394	training	31.007	366.62	CCC(CC)CC	0.167596
46.9937	training	49.878	491.14	CCc1ccc(O)cc1	2.88431
46.9937	training	44.679	477.67	CCc1ccccc1O	2.31469
46.9937	training	43.048	477.66	CCc1cccc(O)c1	3.94569
36.8536	training	36.193	405.15	CCC(CC)OC(C)=O	0.660647
43.942	training	46.793	463.1	CCCC(=O)OC(CC)CC	2.85104
34.8011	training	34.513	393.76	CCC(CC)OC=O	0.288113
41.2837	training	42.44	440.22	CCC(=O)OC(CC)CC	1.1563
41.0873	training	40.796	459.98	CCc1cc(C)ccc1C	0.291319
40.8432	training	40.443	460.44	C=Cc1ccccc1CC	0.400189
40.8432	training	40.697	463.2	C=Cc1cccc(CC)c1	0.146189
40.8432	training	40.904	465.45	C=Cc1ccc(CC)cc1	0.0608109
31.9919	training	33.141	382.15	CCC1CCCO1	1.14912
34.7037	validation	33.777	389.15	CCC1CCOC1	0.926672
38.3522	training	38.167	435.16	CCc1ccc(C)cc1	0.18523
38.3522	validation	37.933	434.48	CCc1cccc(C)c1	0.41923
38.3522	training	38.07	438.33	CCc1ccccc1C	0.28223
33.6105	training	33.766	394.15	CC=C(CC)CCC	0.155533
33.0664	training	33.007	386.15	CC=CC(CC)CC	0.0593597
44.0487	training	43.706	498.15	CCC12CCCCC1CCCC2	0.342738
45.2376	training	46.595	528.15	CCC1CCCC2CCCCC12	1.3574
45.2376	test	43.995	501.15	CCC1CCC2CCCCC2C1	1.2426
36.851	training	36.25	416.2	C#Cc1ccccc1	0.600998
57.6611	training	57.56	655.95	c1ccc2c(c1)-c1cccc3cccc-2c13	0.101147
54.0772	test	53.116	570.44	c1ccc2c(c1)Cc1ccccc1-2	0.961181
14.665	training	23.16	254.05	C=O	8.495
22.3617	training	21.99	373.71	O=CO	0.371681
71.5271	validation	70.052	563.15	O=C(O)/C=C/C(=O)O	1.47511
27.2557	training	27.175	304.5	c1ccoc1	0.0806967
42.1024	test	42.152	434.85	O=Cc1ccco1	0.0496417
48.5635	test	48.62	443.15	OCc1ccco1	0.0565476
42.8729	training	42.773	477.15	O=C1CCCO1	0.099915
74.1425	training	72.802	595.54	O=C(O)CCCC(=O)O	1.34052
56.7245	training	57.21	562.69	O=C1CCCC(=O)O1	0.485455
66.2207	test	66.128	563.15	OCC(O)CO	0.09275
50.0006	training	46.1	478.15	COc1ccccc1O	3.90062
57.0803	validation	56.47	629.65	CCCCCCCCCCCCCCCCCCCCC	0.610262
56.7578	training	56.323	628.15	C=CCCCCCCCCCCCCCCCCCCC	0.434838
64.0438	test	63.609	702.15	CCCCCCCCCCCCCCCCCCCCCc1ccccc1	0.43483
63.4975	training	63.905	705.15	CCCCCCCCCCCCCCCCCCCCCC1CCCCC1	0.407541
62.8783	training	62.719	693.15	CCCCCCCCCCCCCCCCCCCCCC1CCCC1	0.159297
57.6619	training	56.225	627.15	C#CCCCCCCCCCCCCCCCCCCC	1.43691
66.852	validation	66.482	731.15	CCCCCCCCCCCCCCCCCCCCCCCCCCCCCCC	0.369953
66.6415	training	66.383	730.15	C=CCCCCCCCCCCCCCCCCCCCCCCCCCCCCC	0.258546
71.1046	training	71.059	777.15	CCCCCCCCCCCCCCCCCCCCCCCCCCCCCCCc1ccccc1	0.0456299
71.3658	training	71.458	781.15	CCCCCCCCCCCCCCCCCCCCCCCCCCCCCCCC1CCCCC1	0.092177
70.9501	training	70.759	774.15	CCCCCCCCCCCCCCCCCCCCCCCCCCCCCCCC1CCCC1	0.191058
65.9526	training	66.184	728.15	C#CCCCCCCCCCCCCCCCCCCCCCCCCCCCCC	0.231403
86.2402	training	86.033	926.15	CCCCCCCCCCCCCCCCCCCCCCCCCCCCCCCCCCCCCCCCCCCCCCCCCCCCCCCCCCCCCCCCCCCCCC	0.20722
63.4074	training	62.926	695.25	CCCCCCCCCCCCCCCCCCCCCCCCCCC	0.481395
63.01	training	62.818	694.15	C=CCCCCCCCCCCCCCCCCCCCCCCCCC	0.192019
68.7596	training	68.369	750.15	CCCCCCCCCCCCCCCCCCCCCCCCCCCc1ccccc1	0.390598
68.417	training	68.767	754.15	CCCCCCCCCCCCCCCCCCCCCCCCCCCC1CCCCC1	0.350013
67.9716	training	67.872	745.15	CCCCCCCCCCCCCCCCCCCCCCCCCCCC1CCCC1	0.0995529
62.7266	training	62.62	692.15	C#CCCCCCCCCCCCCCCCCCCCCCCCCC	0.106562
53.3738	training	53.39	598.15	CCCCCCCCCCCCCCCCC=O	0.0161954
51.9362	validation	52.483	575.3	CCCCCCCCCCCCCCCCC	0.546809
61.1201	training	61.732	683.15	CCCCCCCCCCCCCC(O)CCCO	0.611912
59.101	training	59.662	662.15	CCCCCCCCCCCCCCC(O)CCO	0.560951
58.2883	training	58.58	651.15	CCCCCCCCCCCCCCCC(O)CO	0.291711
59.5996	training	60.45	670.15	OCCCCCCCCCCCCCCCCCO	0.850359
62.3906	training	57.068	635.75	CCCCCCCCCCCCCCCCC(=O)O	5.32265
53.6033	training	53.683	601.15	CCCCCCCCCCCCCCCC(C)O	0.0796903
61.8239	validation	60.259	597.15	CCCCCCCCCCCCCCCCCO	1.56488
52.4106	training	52.805	592.15	CCCCCCCCCCCCCCCC(C)=O	0.394449
52.0818	training	53.555	573.48	C=CCCCCCCCCCCCCCCC	1.47315
62.455	test	81.196	615	CCCCCCCCCCCCCCCCCOC(C)=O	18.741
66.358	training	67.172	738.1	CCCCCCCCCCCCCCCCCOC(=O)CCC	0.814031
60.0063	training	60.313	668.76	CCCCCCCCCCCCCCCCCOC=O	0.306669
64.1407	training	64.902	715.22	CCCCCCCCCCCCCCCCCOC(=O)CC	0.761278
60.1702	training	59.662	662.15	CCCCCCCCCCCCCCCCCc1ccccc1	0.508249
59.6853	training	59.859	664.15	CCCCCCCCCCCCCCCCCC1CCCCC1	0.173725
58.8259	validation	58.482	650.15	CCCCCCCCCCCCCCCCCC1CCCC1	0.343883
51.3799	training	50.955	573.15	CCC#CCCCCCCCCCCCCC	0.424851
51.3799	training	52.025	584.15	CC#CCCCCCCCCCCCCCC	0.645149
53.437	training	54.58	572.16	C#CCCCCCCCCCCCCCCC	1.14297
85.1732	training	85.123	917.15	CCCCCCCCCCCCCCCCCCCCCCCCCCCCCCCCCCCCCCCCCCCCCCCCCCCCCCCCCCCCCCCCCCC	0.050172
39.7716	training	38.8	425.95	CCCCCCC=O	0.971626
32.1031	training	31.731	371.58	CCCCCCC	0.372114
62.8679	validation	56.831	485.43	CC(O)CCCCCO	6.03688
60.6648	training	59.952	511.15	CCCCCC(O)CO	0.712835
62.3617	training	67.889	515.15	CCCC(O)CCCO	5.52727
59.8153	training	59.008	508.21	CC(O)CCCC(C)O	0.807286
63.4854	training	62.083	535.15	OCCCCCCCO	1.40243
61.3588	validation	61.289	522.15	CCCCC(O)CCO	0.0697547
60.4332	training	59.008	508.21	CCCC(O)CC(C)O	1.42522
58.001	training	59.008	508.21	CCCCC(O)C(C)O	1.00697
53.0113	training	51.731	496.15	CCCCCCC(=O)O	1.2803
48.5396	training	45.769	449.45	CCCCCCCO	2.77061
44.7272	validation	30.501	432.35	CCCCCC(C)O	14.2262
44.4026	training	42.754	429.85	CCCCC(O)CC	1.64857
44.4026	validation	42.547	427.85	CCCC(O)CCC	1.85557
38.2815	training	38.045	420.55	CCCCC(=O)CC	0.236506
39.2717	training	38.62	424.05	CCCCCC(C)=O	0.651661
38.2815	training	37.724	417.15	CCCC(=O)CCC	0.557506
71.0624	training	71.059	777.15	CCCCCCCCCCCCCCCCCCCCCCCCCCCCCCCCCCCCC	0.00344785
71.125	training	70.959	776.15	C=CCCCCCCCCCCCCCCCCCCCCCCCCCCCCCCCCCCC	0.165998
70.6421	test	70.66	773.15	C#CCCCCCCCCCCCCCCCCCCCCCCCCCCCCCCCCCCC	0.0178514
31.2037	training	31.159	371.56	CC=CCCCC	0.0446829
31.2037	training	31.581	368.9	CCC=CCCC	0.377317
31.2037	training	31.726	371.1	CC=CCCCC	0.522317
32.0633	training	31.739	366.79	C=CCCCCC	0.32429
31.2037	training	31.486	368.82	CCC=CCCC	0.282317
41.4136	training	41.482	465.55	CCCCCCCOC(C)=O	0.0684431
45.2332	training	43.617	498.25	CCCCCCCOC(=O)CCC	1.61625
40.3973	training	40.488	451.25	CCCCCCCOC=O	0.0906555
43.1876	training	42.775	483.15	CCCCCCCOC(=O)CC	0.412585
53.8447	training	53.39	598.15	CCCCCCCC1CCc2ccccc2C1	0.454686
53.8447	training	53	594.15	CCCCCCCC1CCCc2ccccc21	0.844686
47.3312	training	47.75	519.25	CCCCCCCc1ccccc1	0.418822
45.7518	training	44.894	518.06	CCCCCCCC1CCCCC1	0.857769
43.4563	validation	43.346	497.3	CCCCCCCC1CCCC1	0.110286
41.4541	training	43.13	492.15	CCCCCCCC1=CCCC1	1.6759
56.0784	training	54.562	610.15	CCCCCCCc1cccc2ccccc12	1.51637
56.0784	training	54.757	612.15	CCCCCCCc1ccc2ccccc2c1	1.32137
32.883	training	32.775	385.15	CC#CCCCC	0.107976
32.883	validation	32.343	380.31	CCC#CCCC	0.539976
32.0742	training	31.878	372.86	C#CCCCCC	0.196196
62.4533	training	61.949	685.35	CCCCCCCCCCCCCCCCCCCCCCCCCC	0.504332
62.0269	training	61.83	684.15	C=CCCCCCCCCCCCCCCCCCCCCCCCC	0.196934
68.0758	training	67.673	743.15	CCCCCCCCCCCCCCCCCCCCCCCCCCc1ccccc1	0.402813
67.6455	validation	68.071	747.15	CCCCCCCCCCCCCCCCCCCCCCCCCCC1CCCCC1	0.42555
67.1832	training	67.077	737.15	CCCCCCCCCCCCCCCCCCCCCCCCCCC1CCCC1	0.106173
61.9116	training	61.633	682.15	C#CCCCCCCCCCCCCCCCCCCCCCCCC	0.278627
52.525	training	52.025	584.15	CCCCCCCCCCCCCCCC=O	0.500014
50.489	training	51.31	560.01	CCCCCCCCCCCCCCCC	0.821032
59.1306	training	59.772	651.48	OCCCCCCCCCCCCCCCCO	0.64139
57.8755	validation	57.206	637.15	CCCCCCCCCCCCCCC(O)CO	0.669528
60.7186	validation	60.351	669.15	CCCCCCCCCCCCC(O)CCCO	0.3676
58.634	training	58.285	648.15	CCCCCCCCCCCCCC(O)CCO	0.349043
62.0321	training	65.61	624.15	CCCCCCCCCCCCCCCC(=O)O	3.57785
60.1665	training	59.073	585.15	CCCCCCCCCCCCCCCCO	1.09351
52.7192	training	52.317	587.15	CCCCCCCCCCCCCCC(C)O	0.4022
51.2342	training	51.636	580.15	CCCCCCCCCCCCCCC(C)=O	0.401835
50.7853	training	52.028	558.02	C=CCCCCCCCCCCCCCC	1.24268
60.103	training	74.634	600	CCCCCCCCCCCCCCCCOC(C)=O	14.531
64.1407	training	64.902	715.22	CCCCCCCCCCCCCCCCOC(=O)CCC	0.761278
57.8509	training	58.062	645.88	CCCCCCCCCCCCCCCCOC=O	0.211076
61.9491	training	62.639	692.34	CCCCCCCCCCCCCCCCOC(=O)CC	0.689853
59.1289	test	61.086	651.16	CCCCCCCCCCCCCCCCc1ccccc1	1.95709
58.6339	training	59.329	652.16	CCCCCCCCCCCCCCCCC1CCCCC1	0.69508
57.6924	training	59.329	637.16	CCCCCCCCCCCCCCCCC1CCCC1	1.63664
58.3094	validation	55.442	619.15	CCCCCCCCCCCCCCCCC1=CCCC1	2.86745
50.015	training	49.595	559.15	CCC#CCCCCCCCCCCCC	0.42002
50.015	training	50.566	569.15	CC#CCCCCCCCCCCCCC	0.55098
52.1056	training	52.802	557.16	C#CCCCCCCCCCCCCCC	0.69635
28.1952	training	28.544	338.15	C=CCC=CC	0.348764
27.9641	validation	27.538	332.61	C=CCCC=C	0.426131
30.5093	training	30.677	355.05	CC=CC=CC	0.167726
30.5093	training	29.804	353.15	CC=CC=CC	0.705274
30.5093	validation	30.507	356.65	CC=CC=CC	0.0022742
29.0454	test	28.83	341.15	CC=C=CCC	0.215382
28.1952	validation	28.544	338.15	C=CCC=CC	0.348764
29.4874	training	29.253	346.15	C=CC=CCC	0.234405
29.4874	test	29.253	346.15	C=CC=CCC	0.234405
29.4707	training	29.609	349.15	C=C=CCCC	0.138295
55.7776	training	54.836	571.16	CCc1c(CC)c(CC)c(CC)c(CC)c1CC	0.941627
84.8014	training	84.819	914.15	CCCCCCCCCCCCCCCCCCCCCCCCCCCCCCCCCCCCCCCCCCCCCCCCCCCCCCCCCCCCCCCCCC	0.0176439
47.3357	training	45.999	536.6	Cc1c(C)c(C)c(C)c(C)c1C	1.33674
40.8733	training	41.884	479.15	CC(C)C(C)(C)C(C)(C)C(C)C	1.01069
41.1546	validation	42.843	489.15	CCC(C)(C)C(C)(C)C(C)(C)C	1.68844
40.8733	training	41.215	472.15	CC(C)C(C)C(C)(C)C(C)(C)C	0.341689
40.8733	training	41.884	479.15	CC(C)C(C)(C)C(C)C(C)(C)C	1.01069
41.1546	training	40.833	468.15	CC(C)(C)CC(C)(C)C(C)(C)C	0.321557
40.8733	training	40.355	463.15	CC(C(C)C(C)(C)C)C(C)(C)C	0.518311
38.8235	training	38.4	467.15	CC(C)(C)C(C)(C)C(C)(C)C	0.423457
36.9704	training	36.542	401.45	CCCCCC=O	0.428366
29.4477	validation	29.107	341.88	CCCCCC	0.340706
56.3779	training	55.155	478.15	CCCC(O)C(C)O	1.22285
61.1205	test	61.892	529.15	CCC(O)CCCO	0.771547
57.9076	training	57.044	493.95	CC(O)CCC(C)O	0.863557
60.3993	training	59.35	508.15	CCCC(O)CCO	1.04927
59.7252	training	58.02	497.15	CCCCC(O)CO	1.70522
63.007	training	66.23	516.15	OCCCCCCO	3.22303
56.1586	test	57.402	496.94	CCC(O)C(O)CC	1.24343
61.5515	training	58.219	510.15	CC(O)CCCCO	3.33253
49.8526	training	52.122	478.85	CCCCCC(=O)O	2.26943
46.7166	test	45.925	430.15	CCCCCCO	0.791641
42.8038	training	42.932	413.04	CCCCC(C)O	0.128153
42.5062	validation	38.123	408.55	CCCC(O)CC	4.38321
36.8954	test	36.624	400.85	CCCCC(C)=O	0.271353
36.081	training	35.316	396.65	CCCC(=O)CC	0.765016
70.4267	training	70.361	770.15	CCCCCCCCCCCCCCCCCCCCCCCCCCCCCCCCCCCC	0.0657023
70.4534	training	70.261	769.15	C=CCCCCCCCCCCCCCCCCCCCCCCCCCCCCCCCCCC	0.19243
73.3325	training	73.956	806.15	CCCCCCCCCCCCCCCCCCCCCCCCCCCCCCCCCCCCc1ccccc1	0.623514
74.8343	test	74.456	811.15	CCCCCCCCCCCCCCCCCCCCCCCCCCCCCCCCCCCCC1CCCCC1	0.37833
74.395	training	73.856	805.15	CCCCCCCCCCCCCCCCCCCCCCCCCCCCCCCCCCCCC1CCCC1	0.538981
69.879	training	69.962	766.15	C#CCCCCCCCCCCCCCCCCCCCCCCCCCCCCCCCCCC	0.0829734
29.0396	training	28.642	336.63	C=CCCCC	0.397622
28.492	training	28.826	342.03	CC=CCCC	0.333983
28.492	training	29.097	341.02	CC=CCCC	0.604983
28.492	training	28.884	339.6	CCC=CCC	0.391983
28.492	validation	29.104	340.24	CCC=CCC	0.611983
39.5695	validation	41.312	444.65	CCCCCCOC(C)=O	1.74246
43.1876	training	41.87	479.15	CCCCCCOC(=O)CCC	1.31759
38.4634	training	38.241	428.65	CCCCCCOC=O	0.222445
41.165	training	40.994	463.15	CCCCCCOC(=O)CC	0.17104
52.4844	training	51.441	578.15	CCCCCCC1CCCc2ccccc21	1.04339
52.4844	training	51.928	583.15	CCCCCCC1CCc2ccccc2C1	0.556392
45.4382	training	44.945	499.26	CCCCCCc1ccccc1	0.493242
43.7414	training	42.844	497.86	CCCCCCC1CCCCC1	0.897428
41.2474	training	41.171	476.26	CCCCCCC1CCCC1	0.0764398
39.6606	test	41.747	473.15	CCCCCCC1=CCCC1	2.08643
63.007	training	61.388	470.65	CC(O)CC(C)(C)O	1.61897
54.7184	test	56.55	595.15	CCCCCCc1cccc2ccccc12	1.83157
54.7184	training	53.195	596.15	CCCCCCc1ccc2ccccc2c1	1.52343
30.6415	training	30.911	357.67	CC#CCCC	0.2695
29.4128	test	30.446	344.48	C#CCCCC	1.03318
30.6415	training	30.369	354.35	CCC#CCC	0.2725
61.3324	training	61.36	583.15	O=Cc1ccc(O)cc1	0.0275705
73.3604	training	73.487	576	CCCCC(O)C(=O)O	0.126613
53.7486	training	53.893	484	C=CC(=O)OCCO	0.144353
41.6001	training	39.543	451.12	c1ccc2c(c1)CCC2	2.05706
41.0179	training	40.939	455.77	C1=Cc2ccccc2C1	0.0788699
23.2632	validation	21.396	261.43	CC(C)C	1.8672
38.3007	test	47.688	380.81	CC(C)CO	9.38732
22.6335	training	22.213	266.25	C=C(C)C	0.420538
35.0425	training	35.877	389.8	CC(=O)OCC(C)C	0.834543
39.2117	training	37.562	405.15	C=CC(=O)OCC(C)C	1.64975
39.3157	training	37.627	430.05	CCCC(=O)OCC(C)C	1.68875
33.021	test	33.979	371.22	CC(C)COC=O	0.958009
40.3351	validation	37.682	420.65	CC(C)COC(=O)C(C)C	2.65305
37.1493	training	35.597	409.75	CCC(=O)OCC(C)C	1.55234
39.0462	training	38.73	445.94	CC(C)Cc1ccccc1	0.316225
35.0752	training	36.057	421.1	CC(C)CC1CCCC1	0.981788
50.8894	training	52.148	585.41	CC(C)Cc1ccc2ccccc2c1	1.25855
50.8894	training	48.965	552.65	CC(C)Cc1cccc2ccccc12	1.92445
47.4409	training	47.485	510	CC(C)Cc1cccc(O)c1	0.0441442
47.4409	training	47.499	510.15	CC(C)Cc1ccc(O)cc1	0.0581442
47.4409	training	47.485	510	CC(C)Cc1ccccc1O	0.0441442
29.7397	test	30.777	337.25	CC(C)C=O	1.03735
41.7002	test	43.881	427.85	CC(C)C(=O)O	2.18075
50.2803	training	53.278	493	CC(C)CCCCCCCO	2.99766
25.6969	training	24.793	300.99	CCC(C)C	0.903856
36.6542	training	37.603	415.25	CC(=O)OCCC(C)C	0.948806
34.7968	training	35.128	397.25	CC(C)CCOC=O	0.331246
44.25	training	43.154	467.15	CC(C)CCOC(=O)CC(C)C	1.09603
39.0518	training	38.443	432.65	CCC(=O)OCCC(C)C	0.608789
41.5299	training	42.37	488.35	CC1=CC(=O)CC(C)(C)C1	0.840125
83.9494	training	84.328	753	O=C(O)c1cccc(C(=O)O)c1	0.378633
26.3455	training	26.066	307.22	C=CC(=C)C	0.27946
31.6114	training	32.228	361.65	CC(=O)OC(C)C	0.61661
35.5216	training	39.87	355.41	CC(C)O	4.34841
37.8115	test	36.024	404.15	CCCC(=O)OC(C)C	1.78755
30.1078	training	29.536	341.25	CC(C)OC=O	0.571836
35.3766	training	33.995	383.15	CCC(=O)OC(C)C	1.38162
57.2633	test	57.402	496.94	CC(C)C(CO)CO	0.138672
57.3514	validation	59.008	508.21	CC(C)C(CO)CCO	1.65658
48.579	validation	49.24	488.35	CCCCC(CCO)C(C)C	0.660981
44.7641	training	47.141	473.74	CCCC(CO)C(C)C	2.37689
32.339	training	32.833	386.15	C=C(CCC)C(C)C	0.493962
36.811	training	36.61	439.86	CCCC(C(C)C)C(C)C	0.200966
45.818	training	45.661	463.15	CCCC(O)(CCC)C(C)C	0.157037
35.2408	training	36.665	427.91	CC(C)C1CCCCC1	1.42419
32.5702	validation	33.895	399.57	CC(C)C1CCCC1	1.32482
26.8233	training	27.958	331.47	CC(C)C1CC1	1.13469
37.379	training	37.447	432.06	CCCC(CCC)C(C)C	0.068022
48.9708	test	47.831	540.94	CC(C)c1cccc2ccccc12	1.13982
48.9708	training	47.871	541.35	CC(C)c1ccc2ccccc2c1	1.09982
41.6513	training	41.119	471.15	CCCCC(CCCC)C(C)C	0.532295
41.6513	training	41.119	471.15	CCCCCC(CCC)C(C)C	0.532295
39.5948	training	39.481	451.15	CCCCC(CCC)C(C)C	0.113805
46.5969	training	45.047	487.65	CC(C)c1ccccc1O	1.54985
46.5969	training	46.467	502.35	CC(C)c1ccc(O)cc1	0.129854
46.5969	training	46.351	501.15	CC(C)c1cccc(O)c1	0.245854
30.8527	training	31.853	378.66	CC(C)OC(C)(C)C	1.0003
71.3548	training	72.074	601	C=C(CC(=O)O)C(=O)O	0.719201
19.4086	training	19.39	223.34	C=C=O	0.0185644
57.5814	training	58.158	447	CC(O)C(=O)O	0.57663
52.4676	training	52.639	518.95	CC(=O)CCC(=O)O	0.171426
69.5672	training	68.997	628	CCCCC/C=C\C/C=C\CCCCCCCC(=O)O	0.570191
71.5271	training	71.017	565	O=C(O)/C=C\C(=O)O	0.510113
47.3078	training	47.22	475.15	O=C1C=CC(=O)O1	0.087845
90.7006	training	90.649	602	O=C(O)CC(O)C(=O)O	0.0515724
35.6453	training	36.086	402.95	CC(=O)C=C(C)C	0.440725
39.498	training	39.311	437.89	Cc1cc(C)cc(C)c1	0.187013
51.372	training	51.524	452	CC(O)C(C)O	0.151996
57.2709	validation	57.402	496.94	CC(CO)C(C)CO	0.13109
57.7118	training	59.008	508.21	CC(CO)CC(C)CO	1.29623
55.1413	training	54.413	474.15	CC(O)CC(C)O	0.728287
29.8598	test	29.74	341.15	C=C(C)C=O	0.119814
38.6417	training	33.22	434.15	C=C(C)C(=O)O	5.42168
8.16503	validation	8.16	111.66	C	0.00502801
52.0323	training	52.916	478.26	COCC(=O)O	0.883684
39.0134	test	39.47	397.55	COCCO	0.456601
48.9358	training	46.384	466.75	COCCOCCO	2.55177
50.0006	training	53.904	516	COc1ccc(O)cc1	3.90338
30.1656	training	30.611	359.45	CCC(C)(C)OC	0.445415
31.2617	validation	30.501	356.15	COC(C)C(C)C	0.76073
31.6699	validation	31.232	361.15	CCC(CC)OC	0.437946
31.6807	training	31.504	364.15	CCCC(C)OC	0.176743
30.8312	training	30.199	356.15	COCC(C)(C)C	0.632161
31.7709	training	31.413	363.15	CCC(C)COC	0.357912
31.7366	training	31.413	363.15	COCCC(C)C	0.323611
31.7422	training	30.612	330.09	COC(C)=O	1.13022
43.5165	training	43.125	444.85	COC(=O)CC(C)=O	0.391513
31.1344	training	32.211	353.35	C=CC(=O)OC	1.07662
35.1353	training	35.139	337.85	CO	0.00371833
44.0598	training	44.023	472.65	COC(=O)c1ccccc1	0.0367638
33.9987	training	33.298	375.9	CCCC(=O)OC	0.70065
30.0481	validation	30.468	343.35	CCCCOC	0.419885
51.345	validation	51.917	540	CCCCCCCCCCCC(=O)OC	0.572029
25.2282	validation	31.224	280.5	CCOC	5.99584
31.2773	test	31.221	352.79	CCC(C)=O	0.0563455
28.6458	training	28.186	304.9	COC=O	0.459827
29.5188	training	28.09	331.7	COCC(C)C	1.42884
32.6436	training	32.655	371.15	C=C(C)C(C)=O	0.0113714
27.1902	training	26.501	303.92	COC(C)C	0.689168
32.1062	training	33.721	367.55	CC(=O)C(C)C	1.61483
32.3615	test	34.305	373.45	C=C(C)C(=O)OC	1.9435
63.2864	training	63.625	617	CCCCCCCC/C=C\CCCCCCCC(=O)OC	0.338558
32.5689	training	32.526	372.15	CCCCCOC	0.0428543
32.0894	validation	32.438	352.6	CCC(=O)OC	0.348586
27.6108	training	31.003	311.72	CCCOC	3.39215
34.2155	test	33.468	375.46	CCCC(C)=O	0.747485
52.1413	training	52.021	493.65	COC(=O)c1ccccc1O	0.120262
29.4263	test	28.885	332.15	CCC(C)OC	0.541301
28.1604	training	28.174	328.35	COC(C)(C)C	0.0135718
30.1656	training	30.611	359.45	CCC(C)(C)OC	0.445415
24.9991	training	25.053	278.65	C=COC	0.053909
42.7252	test	43.625	493.74	CC1CCCc2ccccc21	0.899803
42.7252	training	43.57	493.15	CC1CCc2ccccc2C1	0.844803
50.3135	validation	49.886	562.15	CCC(c1ccccc1)c1ccccc1	0.427518
49.4089	training	49.789	561.15	Cc1cccc(C(C)c2ccccc2)c1	0.380138
49.4089	test	49.984	563.15	Cc1ccc(C(C)c2ccccc2)cc1	0.575138
26.5417	training	26.657	314	C=C=C(C)C	0.115301
53.7053	training	52.361	462.15	CCC(C)(O)CO	1.34434
54.9826	training	54.294	473.15	CC(C)C(O)CO	0.688638
50.7941	training	50.566	569.15	Cc1cccc(CCc2ccccc2)c1	0.228062
50.7941	training	49.789	561.15	Cc1ccc(CCc2ccccc2)cc1	1.00506
50.3135	training	50.663	570.15	CC(Cc1ccccc1)c1ccccc1	0.349482
56.3089	training	56.686	494.25	CCCCC(C)(O)CO	0.377061
28.8408	training	28.856	343.15	C=C=C(C)CC	0.0151785
28.8668	validation	28.792	343.15	C=C=CC(C)C	0.0747694
55.9111	training	55.918	490	CCCC(C)(O)CO	0.00687806
51.4937	training	50.808	451.15	CC(C)(O)CO	0.68571
53.3869	training	53.616	472.15	CC(C)(O)CCO	0.229071
54.3781	training	51.628	473.15	CC(O)C(C)CO	2.75011
29.0413	validation	29.323	349.45	C=CC=C(C)C	0.281674
55.5919	training	55.088	482.98	CCC(C)(O)CCO	0.503876
56.1729	training	56.985	493.45	CCC(O)C(C)CO	0.812068
56.8852	training	56.28	487.15	CC(O)CCO	0.605174
57.5706	training	53.106	463.15	CC(CO)CCO	4.46459
26.1591	training	27.074	323.15	C=CCC(=C)C	0.914934
26.991	training	27.481	328.15	C=CC(C)C=C	0.489988
57.5859	training	59.008	508.21	CC(O)C(C)CCCO	1.42212
58.8907	training	56.686	494.25	CC(C)(O)CCCCO	2.2047
58.5339	training	57.402	496.94	CC(CO)CCCO	1.13187
58.5804	validation	60.972	521.55	CC(CCO)CCO	2.39158
59.1046	training	56.831	485.43	CC(CCO)CCCO	2.27362
29.0413	training	29.385	350.15	C=CC(C)=CC	0.343674
29.0413	test	29.297	349.15	C=C(C)C=CC	0.255674
29.0413	training	29.297	349.15	C=C(C)C=CC	0.255674
29.0413	training	29.385	350.15	C=CC(C)=CC	0.343674
40.6521	training	44.747	401.85	CCC(C)CO	4.09492
41.1188	training	45.775	404.35	CC(C)CCO	4.65623
24.933	training	24.386	293.21	C=CC(C)C	0.54697
25.4703	training	25.585	304.3	C=C(C)CC	0.114722
25.2401	test	25.084	305.4	C#CC(=C)C	0.156089
25.9012	training	26.02	302.15	C#CC(C)C	0.118804
41.2963	training	40.921	463.85	C=C(C)CCCCCCCC	0.375262
45.0575	training	44.312	504.45	C=C(C)CCCCCCCCCC	0.745496
36.8955	training	36.18	425.31	CCC1(C)CCCCC1	0.715451
33.3839	training	33.225	394.67	CCC1(C)CCCC1	0.158897
26.4529	training	27.819	329.92	CCC1(C)CC1	1.36611
50.0132	test	48.336	546.15	CCc1c(C)ccc2ccccc12	1.67724
51.8399	validation	52.415	588.15	C=C(C)CCCCCCCCCCCCCCC	0.575135
47.1682	training	46.147	459.75	CCC(C)CCCCO	1.02122
47.1682	training	45.792	456.35	CCCC(C)CCCO	1.37622
47.1682	training	46.084	459.15	CCCCC(C)CCO	1.08422
46.6203	training	44.998	448.75	CCCCCC(C)CO	1.62229
47.1682	validation	46.262	460.85	CC(C)CCCCCO	0.906222
34.038	training	33.696	392.45	C=C(C)CCCCC	0.342014
33.4055	training	33.106	386.35	C=CCCCC(C)C	0.299501
33.4055	test	33.115	386.45	C=CCCC(C)CC	0.290501
33.4055	training	33.07	385.95	C=CCC(C)CCC	0.335501
33.4055	training	32.909	384.15	C=CC(C)CCCC	0.496501
50.6626	training	50.955	573.15	C=C(C)CCCCCCCCCCCCCC	0.292392
45.3523	training	44.444	446.15	CCC(C)CCCO	0.908287
45.3523	training	44.34	445.15	CCCC(C)CCO	1.01229
44.8308	training	43.407	436.15	CCCCC(C)CO	1.42384
45.3523	training	48.066	445.15	CC(C)CCCCO	2.71371
30.6422	training	30.419	358.46	C=CCCC(C)C	0.2232
30.6422	training	30.623	359.88	C=CCC(C)CC	0.0192004
30.6422	training	30.731	357.05	C=CC(C)CCC	0.0887996
31.2536	training	31.083	364.99	C=C(C)CCCC	0.170578
30.2247	test	30.869	365	C#CCCC(C)C	0.64427
30.2247	test	30.793	364.15	C#CCC(C)CC	0.56827
30.2247	training	30.261	358.15	C#CC(C)CCC	0.0362695
34.8067	training	35.755	421.15	CC(C)C1(C)CCCC1	0.948266
51.3012	training	52.148	585.41	Cc1ccc2ccccc2c1C(C)C	0.846814
54.0881	training	55.051	615.15	C=C(C)CCCCCCCCCCCCCCCCC	0.962885
50.2803	training	49.568	487	CCC(C)CCCCCCO	0.712339
50.2803	validation	49.568	487	CCCCCCC(C)CCO	0.712339
50.2803	training	49.568	487	CCCCC(C)CCCCO	0.712339
50.2803	training	49.299	489.15	CCCCCC(C)CCCO	0.981339
49.6871	validation	50.432	495.15	CCCCCCCC(C)CO	0.744901
39.0904	test	38.616	441.55	C=C(C)CCCCCCC	0.474442
52.9766	training	53.78	602.15	C=C(C)CCCCCCCCCCCCCCCC	0.803434
48.7986	validation	48.469	479.15	CCC(C)CCCCCO	0.329578
48.7986	training	47.821	473	CCCC(C)CCCCO	0.977578
48.7986	training	47.821	473	CCCCC(C)CCCO	0.977578
48.7986	training	47.821	473	CCCCCC(C)CCO	0.977578
48.2265	training	47.821	473	CCCCCCC(C)CO	0.405486
48.7986	training	48.469	479.15	CC(C)CCCCCCO	0.329578
36.6642	training	36.209	417.8	C=C(C)CCCCCC	0.45516
49.4239	training	49.401	557.15	C=C(C)CCCCCCCCCCCCC	0.0228671
42.8395	training	42.879	421.15	CCCC(C)CO	0.0394579
43.3334	training	40.407	424.95	CC(C)CCCO	2.92637
43.3334	training	40.575	425.55	CCC(C)CCO	2.75837
27.7943	training	27.301	327.33	C=CC(C)CC	0.493295
28.3721	training	28.355	335.25	C=C(C)CCC	0.0171077
27.7943	training	27.414	327.01	C=CCC(C)C	0.380295
27.967	training	27.7	330.85	C#CC(C)CC	0.266984
27.967	validation	28.005	334.32	C#CCC(C)C	0.0380161
40.2835	validation	38.882	447.15	CC=C(C)c1ccccc1	1.40145
40.2835	training	40.151	461.06	CC(C)=Cc1ccccc1	0.132455
40.2835	training	40.77	467.85	CC=C(C)c1ccccc1	0.486545
35.9754	training	35.893	419.15	CCCC1(C)CCCC1	0.082396
51.6432	training	52.148	585.41	CCCc1c(C)ccc2ccccc12	0.504765
48.0974	training	47.755	540.15	C=C(C)CCCCCCCCCCCC	0.342406
46.6528	training	46.113	523.15	C=C(C)CCCCCCCCCCC	0.539775
40.0803	training	39.159	445.35	C=C(C)c1ccccc1C	0.921283
41.337	test	40.815	465.57	CC=Cc1ccccc1C	0.521986
52.5979	training	50.067	447.15	CC(O)C(C)(C)O	2.53087
42.6956	training	42.571	479.75	CCc1cccc(C)c1CC	0.124633
29.3353	training	28.966	345.15	CC=C=C(C)C	0.369339
54.7539	validation	57.187	505.76	CCC(C)(O)C(C)O	2.43311
54.7539	training	57.187	505.76	CCC(O)C(C)(C)O	2.43311
42.6956	training	42.422	478.15	CCc1ccc(C)c(CC)c1	0.273633
59.4516	training	61.135	530.99	CCC(O)C(C)C(C)O	1.68337
56.7584	validation	58.799	517.03	CCC(O)CC(C)(C)O	2.04059
58.6824	training	58.799	517.03	CCC(C)(O)CC(C)O	0.116648
59.007	training	61.135	530.99	CC(O)CC(O)C(C)C	2.12802
56.7261	training	64.008	484.65	CC(O)C(C)C(C)O	7.28194
42.6956	training	42.617	480.25	CCc1ccc(CC)c(C)c1	0.0786326
57.8818	training	58.799	517.03	CC(O)CCC(C)(C)O	0.917185
42.6956	test	42.775	481.95	CCc1cccc(CC)c1C	0.0793674
37.9856	training	43.205	384.65	CC(C)C(C)O	5.21942
26.5028	training	26.482	311.71	CC=C(C)C	0.0208312
42.3841	validation	42.622	471.65	CC=C(C)C(=O)O	0.2379
42.3841	training	42.292	468.15	CC(C)=CC(=O)O	0.0921002
42.3841	training	41.347	458.15	CC=C(C)C(=O)O	1.0371
42.2807	training	42.765	481.15	CCCCc1ccccc1C	0.484274
57.7165	training	56.977	498.95	CCC(C)(CO)CO	0.739501
42.8101	training	42.872	435.15	CCC(CO)C(C)C	0.061928
41.8388	training	41.891	430.15	CCC(C)(CC)CO	0.0522255
29.6857	training	30.28	359.52	C=C(CC)C(C)C	0.594303
46.5488	training	46.627	466	CCC(CO)CCC(C)C	0.0782166
46.5488	training	46.851	468.15	CCC(C)CC(CC)CO	0.302217
46.5488	training	46.61	466.15	CCCC(C)C(CC)CO	0.0612166
45.7072	training	46.21	462	CCCCC(CC)C(C)O	0.502844
44.7641	training	44.683	450	CCC(C)C(CC)CO	0.0811112
43.6882	test	44.219	450.25	CCCC(C)(CC)CO	0.530833
44.7641	training	44.646	449.65	CCC(CO)CC(C)C	0.118111
32.339	training	32.7	384.65	C=C(CC)C(C)CC	0.360962
32.339	training	32.593	383.45	C=C(CC)CC(C)C	0.253962
50.0132	training	48.626	549.15	CCc1ccc2ccccc2c1C	1.38724
47.6758	training	46.166	495.55	CCc1cc(C)ccc1O	1.50984
44.4349	training	44.171	445.05	CC(C)CCCC(C)O	0.263945
42.9992	training	42.132	429.85	CCCCCC(C)(C)O	0.867204
44.2176	training	43.571	439.25	CCCCC(C)C(C)O	0.646645
44.4349	training	44.14	444.75	CCCC(C)CC(C)O	0.294945
44.4349	training	44.171	445.05	CCC(C)CCC(C)O	0.263945
33.6105	training	33.91	395.75	CCCCC=C(C)C	0.299533
40.7583	training	40.45	415.95	CCCCC(C)(C)O	0.308295
42.4352	training	41.845	425.15	CCCC(C)C(C)O	0.590245
42.6218	training	41.743	424.15	CCC(C)CC(C)O	0.878842
42.6218	training	41.743	424.15	CC(C)CCC(C)O	0.878842
36.8223	training	36.997	413.15	CCCC(C)C(C)=O	0.174709
37.3	training	38.431	417.95	CC(=O)CCC(C)C	1.13096
37.3	validation	36.903	412.15	CCC(C)CC(C)=O	0.39704
31.1438	test	31.281	368.56	CCCC=C(C)C	0.137158
31.0555	test	31.645	375.61	CC#CCC(C)C	0.589471
47.7183	training	47.555	477.15	CC(C)CC(CO)CC(C)C	0.163257
41.1528	training	41.27	469.15	Cc1ccccc1CC(C)C	0.117187
44.0334	training	43.848	446.15	CC(C)C(CO)C(C)C	0.185448
31.0892	training	31.747	377.15	C=C(C(C)C)C(C)C	0.657778
47.7183	training	48.543	486.15	CC(C)CCC(CO)C(C)C	0.824743
47.7183	training	47.243	474.15	CCC(C)CC(CO)C(C)C	0.475257
45.949	training	45.522	460.15	CC(C)CC(CO)C(C)C	0.426975
51.3012	training	52.148	585.41	Cc1cc2ccccc2cc1C(C)C	0.846814
47.8379	validation	46.548	501.15	Cc1cccc(O)c1C(C)C	1.28988
47.8379	test	46.548	501.15	Cc1ccc(O)c(C(C)C)c1	1.28988
47.8379	training	46.985	505.65	Cc1ccc(C(C)C)c(O)c1	0.852882
47.768	training	48.577	487	CCCCCCCC(C)(C)O	0.809009
47.2132	training	49.099	487	CCCC(C)CCCC(C)O	1.88575
47.2132	validation	49.099	487	CC(C)CCCCCC(C)O	1.88575
46.9377	test	49.099	487	CCCCCCC(C)C(C)O	2.16131
47.2132	training	49.099	487	CCC(C)CCCCC(C)O	1.88575
47.2132	training	49.099	487	CCCCC(C)CCC(C)O	1.88575
45.9545	training	45.377	454	CC(C)CCCCC(C)O	0.5775
45.9545	training	45.377	454	CCCC(C)CCC(C)O	0.5775
45.3612	training	44.592	451.15	CCCCCCC(C)(C)O	0.76924
45.7072	training	45.377	454	CCCCCC(C)C(C)O	0.330156
38.7205	training	37.132	394.56	CCCC(C)(C)O	1.58854
40.5079	training	54.078	404.85	CC(C)CC(C)O	13.5701
40.351	validation	38.352	407.36	CCC(C)C(C)O	1.99901
34.5869	training	33.939	390.55	CCC(C)C(C)=O	0.647873
34.8781	training	35.816	389.65	CC(=O)CC(C)C	0.937855
28.75	training	28.902	340.45	CCC=C(C)C	0.15197
29.0112	training	28.91	346.28	CC#CC(C)C	0.101152
57.9889	training	58.541	509.85	CCCC(C)(CO)CO	0.552064
48.1895	test	48.485	481.15	CCCC(CO)CC(C)CC	0.295494
46.5488	training	46.588	465.15	CCCC(CO)CC(C)C	0.0392166
40.3556	training	40.517	458.08	CCCc1ccccc1C	0.161422
51.6432	training	52.148	585.41	CCCc1cc2ccccc2cc1C	0.504765
51.6432	training	52.148	585.41	CCCc1ccc2ccccc2c1C	0.504765
48.6383	training	51.577	547.87	CCCc1ccc(C)cc1O	2.9387
48.6383	training	51.577	547.87	CCCc1cc(C)ccc1O	2.9387
48.6383	training	50.313	535	CCCc1c(C)cccc1O	1.6747
41.1528	test	41.27	469.15	CCC(C)c1ccccc1C	0.117187
39.852	validation	40.896	473.6	Cc1ccccc1C(C)(C)C	1.044
40.0803	training	40.338	458.15	C=C(C)c1cccc(C)c1	0.257717
41.337	training	40.815	465.57	CC=Cc1cccc(C)c1	0.521986
41.0567	training	41.597	476.15	CCCCC(CC)(CC)C(C)C	0.540298
41.0567	training	41.789	478.15	CCCC(C)C(CC)(CC)CC	0.732298
38.8643	training	39.462	459.15	CCCC(CC)(CC)C(C)C	0.597693
42.6956	training	42.292	476.75	CCc1ccc(C)cc1CC	0.403633
41.0567	training	41.406	474.15	CCCC(CC)C(C)(CC)CC	0.349298
41.0095	validation	40.833	468.15	CCCC(CC)C(CC)C(C)C	0.176532
41.0567	training	41.406	474.15	CCCC(C)(CC)C(CC)CC	0.349298
38.9884	training	39.218	452.15	CCC(CC)C(CC)C(C)C	0.229631
38.8643	test	39.462	459.15	CCC(CC)C(C)(CC)CC	0.597693
56.7598	training	58.799	517.03	CCC(O)C(C)(O)CC	2.03925
42.6956	training	42.023	473.85	CCc1cc(C)cc(CC)c1	0.672633
41.0095	validation	40.833	468.15	CCC(CC)CC(CC)C(C)C	0.176532
41.0567	training	41.024	470.15	CCC(CC)CC(C)(CC)CC	0.0327023
41.0095	training	41.31	473.15	CCC(CC)C(C)C(CC)CC	0.300468
37.7625	training	40.677	450	C=C(C)CC(=O)O	2.91454
42.4356	training	40.626	450	C=CC(C)C(=O)O	1.80958
42.2807	training	42.486	478.15	CCCCc1cccc(C)c1	0.205274
57.7118	training	59.008	508.21	CCC(CO)C(C)CO	1.29623
45.9545	training	46.538	465.15	CCCC(CC)CC(C)O	0.5835
44.7641	training	44.476	448	CCC(CC)C(C)CO	0.288111
44.5295	training	43.988	448	CCC(C)(CC)CCO	0.541487
45.0886	training	44.476	448	CCC(CCO)C(C)C	0.612573
32.339	training	32.566	383.15	C=C(C)C(CC)CC	0.226962
32.2596	training	32.303	380.65	C=CC(CC)C(C)C	0.0433795
31.9399	training	32.383	385.15	C=CC(C)(CC)CC	0.443112
44.1343	training	44.158	451.15	CCCC(CC)C(C)(C)O	0.0237096
43.017	training	42.926	437.15	CCC(C(C)C)C(C)O	0.0909693
41.8863	training	41.829	430.95	CCC(CC)C(C)(C)O	0.0572568
42.1923	training	42.036	433	CCC(C)(CC)C(C)O	0.156314
34.024	training	33.15	390.15	CCC(CC)=C(C)C	0.874006
45.818	training	45.969	466.15	CCCCC(O)(CC)C(C)C	0.150963
46.1412	training	45.954	466	CCC(C)CC(O)(CC)CC	0.187172
43.5913	training	44.78	457.25	CCCC(O)(CC)C(C)C	1.18872
43.8673	training	43.545	445.15	CCC(O)(CC)CC(C)C	0.322324
43.5913	training	44.244	452	CCC(C)C(O)(CC)CC	0.652716
40.7008	training	41.31	473.15	CCCC(CC)(C(C)C)C(C)C	0.609212
41.4199	training	42.052	433.15	CCC(O)(CC)C(C)C	0.632143
32.4913	training	33.02	389.15	CC=C(CC)C(C)C	0.528677
50.0132	training	51.647	550.16	CCc1cc2ccccc2cc1C	1.63376
50.0132	validation	48.336	546.15	CCc1cc(C)c2ccccc2c1	1.67724
41.6513	training	41.215	472.15	CCCCC(C)CC(CC)CC	0.436295
41.6654	validation	41.693	477.15	CCCCCCC(C)(CC)CC	0.0275637
41.6513	training	41.406	474.15	CCCCCCC(CC)C(C)C	0.245295
41.6513	validation	41.31	473.15	CCCCCC(C)C(CC)CC	0.341295
39.5948	training	39.848	455.15	CCCCCC(CC)C(C)C	0.253195
39.5948	training	39.939	456.15	CCCCC(C)C(CC)CC	0.344195
39.4425	training	39.788	458.85	CCCCCC(C)(CC)CC	0.345538
32.0278	training	32.807	391.42	CCC(C)(CC)CC	0.779245
47.6758	training	47.49	509.15	CCc1cc(O)ccc1C	0.185842
47.6758	training	46.614	500.15	CCc1cccc(O)c1C	1.06184
32.4913	training	32.869	387.45	CC=C(CC)C(C)C	0.377677
44.2176	training	42.28	426.75	CCC(C)CC(O)CC	1.93764
44.006	training	42.466	428.55	CCCC(C)C(O)CC	1.54
44.2176	test	42.925	433	CCC(O)CCC(C)C	1.29264
44.006	training	43.726	440.75	CCCCC(O)C(C)C	0.279995
42.7145	validation	42.572	434.15	CCCCC(C)(O)CC	0.142499
40.5	training	40.45	415.95	CCCC(C)(O)CC	0.0499764
42.2558	training	41.538	422.15	CCC(C)C(O)CC	0.717831
42.4352	training	41.435	421.15	CCC(O)CC(C)C	1.00024
42.2558	training	41.128	418.15	CCCC(O)C(C)C	1.12783
36.8223	training	36.622	409.15	CCC(=O)CC(C)C	0.200291
36.2278	training	36.622	409.15	CCC(=O)C(C)CC	0.394232
36.2278	training	36.341	406.15	CCCC(=O)C(C)C	0.113232
31.0555	training	31.004	368.35	CCC#CC(C)C	0.0515292
41.1528	training	41.086	467.15	Cc1cccc(CC(C)C)c1	0.0668131
45.088	training	45.381	465.15	CCCC(O)(C(C)C)C(C)C	0.293039
42.9984	training	43.685	451.15	CCC(O)(C(C)C)C(C)C	0.686644
38.9884	training	39.154	451.45	CCCCC(C(C)C)C(C)C	0.165631
51.3012	training	52.148	585.41	Cc1cc(C(C)C)cc2ccccc12	0.846814
41.0095	training	40.928	469.15	CCCCCC(C(C)C)C(C)C	0.0815316
47.8379	validation	47.407	510	Cc1cc(O)ccc1C(C)C	0.430882
47.8379	training	51.047	547.43	Cc1c(O)cccc1C(C)C	3.20912
46.6644	training	48.527	481.55	CCCCCCC(O)C(C)C	1.86258
46.9377	training	48.574	482	CCCCC(C)CC(O)CC	1.63631
47.4112	training	48.058	482	CCCCCCC(C)(O)CC	0.646765
45.4638	training	45.705	457.15	CCCCCC(O)C(C)C	0.241161
45.0435	training	45.725	462.15	CCCCCC(C)(O)CC	0.681457
45.4638	training	45.898	459	CCCCC(C)C(O)CC	0.434161
45.7072	training	45.898	459	CCC(C)CCC(O)CC	0.190844
45.7072	training	45.898	459	CCC(O)CCCC(C)C	0.190844
38.4818	training	37.065	395.56	CCC(C)(O)CC	1.41677
40.2027	training	37.442	399.66	CCC(O)C(C)C	2.76073
40.3556	training	40.248	455.13	CCCc1cccc(C)c1	0.107578
48.6383	training	51.577	547.87	CCCc1cc(O)ccc1C	2.9387
48.6383	training	48.35	515	CCCc1cccc(O)c1C	0.288299
41.1528	training	41.086	467.15	CCC(C)c1cccc(C)c1	0.0668131
39.852	validation	39.884	462.41	Cc1cccc(C(C)(C)C)c1	0.0319995
40.0803	training	40.43	459.15	C=C(C)c1ccc(C)cc1	0.349717
41.337	test	41.144	469.15	CC=Cc1ccc(C)cc1	0.192986
41.337	training	41.603	474.15	CC=Cc1ccc(C)cc1	0.266014
41.0567	test	40.737	467.15	CCCC(CC)(CC)CC(C)C	0.319702
41.0567	training	41.693	477.15	CCCC(CC)(CC)C(C)CC	0.636298
38.8643	training	39.822	463.15	CCC(C)C(CC)(CC)CC	0.957693
38.8643	validation	38.831	452.15	CCC(CC)(CC)CC(C)C	0.0333072
41.0095	training	40.641	466.15	CCC(CC)C(CC)CC(C)C	0.368532
41.0095	training	41.119	471.15	CCC(C)C(CC)C(CC)CC	0.109468
42.2807	training	42.672	480.15	CCCCc1ccc(C)cc1	0.391274
44.4833	training	44.729	452	CCC(CC)C(O)C(C)C	0.245675
43.8673	training	44.244	452	CCC(CC)C(C)(O)CC	0.376676
40.5668	training	40.355	463.15	CCC(CC)C(C(C)C)C(C)C	0.211817
50.0132	training	48.432	547.15	CCc1ccc(C)c2ccccc12	1.58124
50.0132	test	48.432	547.15	CCc1cc(C)cc2ccccc12	1.58124
41.6513	training	41.406	474.15	CCCCCC(CC)C(C)CC	0.245295
41.6513	test	41.215	472.15	CCCCC(C)C(CC)CCC	0.436295
41.6654	training	41.215	472.15	CCCCCC(C)(CC)CCC	0.450436
41.6513	training	41.119	471.15	CCCCCC(CC)CC(C)C	0.532295
39.5948	training	39.848	455.15	CCCCC(CC)C(C)CC	0.253195
39.5948	training	39.298	449.15	CCCCC(CC)CC(C)C	0.296805
39.4425	training	39.27	453.15	CCCCC(C)(CC)CCC	0.172462
47.6758	training	46.672	500.75	CCc1ccc(O)c(C)c1	1.00384
47.6758	training	46.906	503.15	CCc1ccc(O)cc1C	0.769842
42.7145	validation	42.582	434.25	CCCC(C)(O)CCC	0.132499
44.006	training	43.426	437.85	CCCC(O)C(C)CC	0.579995
44.2176	training	43.571	439.25	CCCC(O)CC(C)C	0.646645
41.1528	validation	41.27	469.15	Cc1ccc(CC(C)C)cc1	0.117187
38.8643	training	38.921	453.15	CCCC(C)(CCC)C(C)C	0.0566928
38.9884	training	38.582	445.15	CCCC(CC(C)C)C(C)C	0.406369
38.9884	validation	39.036	450.15	CCCC(C(C)C)C(C)CC	0.047631
51.3012	training	52.148	585.41	Cc1ccc(C(C)C)c2ccccc12	0.846814
41.0095	training	40.355	463.15	CCCCC(CC(C)C)C(C)C	0.654532
41.0567	training	41.119	471.15	CCCCC(C)(CCC)C(C)C	0.0622977
41.0095	training	40.833	468.15	CCCCC(C(C)C)C(C)CC	0.176532
47.8379	training	47.407	510	Cc1cc(O)ccc1C(C)C	0.430882
47.8379	test	51.082	547	Cc1cc(C(C)C)ccc1O	3.24412
46.6644	training	48.574	482	CCCCC(C)C(O)CCC	1.90958
46.9377	test	48.574	482	CCCC(O)CCC(C)CC	1.63631
46.9377	training	48.574	482	CCCCCC(O)CC(C)C	1.63631
47.4112	training	48.058	482	CCCCCC(C)(O)CCC	0.646765
45.7072	training	45.481	455	CCCC(O)CCC(C)C	0.226156
45.7072	training	45.481	455	CCCC(O)CC(C)CC	0.226156
45.4638	training	45.481	455	CCCC(C)C(O)CCC	0.0171611
45.0435	training	44.901	454.15	CCCCC(C)(O)CCC	0.142543
45.4638	training	45.288	453.15	CCCCC(O)C(C)CC	0.175839
45.7072	training	45.705	457.15	CCCCC(O)CC(C)C	0.00215577
40.3556	training	39.708	453.53	CCCc1ccc(C)cc1	0.647578
39.5948	training	39.573	452.15	CCCC(CCC)C(C)CC	0.021805
39.5948	training	39.114	447.15	CCCC(CCC)CC(C)C	0.480805
39.4425	training	39.089	451.15	CCCC(C)(CCC)CCC	0.353462
41.6654	training	40.833	468.15	CCCCC(C)(CCC)CCC	0.832436
41.6513	training	40.451	464.15	CCCCC(CCC)CC(C)C	1.20029
41.6513	training	41.024	470.15	CCCCC(CCC)C(C)CC	0.627295
48.6383	training	48.365	515.15	CCCc1ccc(O)c(C)c1	0.273299
48.6383	training	50.313	535	CCCc1ccc(O)cc1C	1.6747
41.1528	training	41.362	470.15	CCC(C)c1ccc(C)cc1	0.209187
39.852	training	40.2	465.91	Cc1ccc(C(C)(C)C)cc1	0.347999
40.8013	training	41.119	471.15	CCCC(C)(CCC)C(C)(C)C	0.317729
40.7008	training	39.878	458.15	CCCC(CC(C)C)C(C)(C)C	0.822788
40.7008	training	40.355	463.15	CCCC(C(C)CC)C(C)(C)C	0.345788
41.0567	training	41.119	471.15	CCC(CC)(CC)CCC(C)C	0.0622977
41.0567	training	41.215	472.15	CCC(C)CC(CC)(CC)CC	0.158298
45.9689	training	46.449	466	CCC(O)C(C)C(CC)CC	0.480083
50.0132	training	48.045	543.15	CCc1cccc2c(C)cccc12	1.96824
50.0132	training	48.045	543.15	CCc1cccc2cc(C)ccc12	1.96824
41.6513	test	40.833	468.15	CCCCC(CC)CC(C)CC	0.818295
41.6513	training	40.928	469.15	CCCCC(CC)CCC(C)C	0.723295
41.6513	training	41.119	471.15	CCCCC(CC)C(C)CCC	0.532295
41.6654	training	41.119	471.15	CCCCC(C)(CC)CCCC	0.546436
39.5948	training	39.481	451.15	CCCC(CC)CCC(C)C	0.113805
39.5948	training	39.664	453.15	CCCC(C)C(CC)CCC	0.069195
39.5948	training	39.298	449.15	CCCC(CC)CC(C)CC	0.296805
47.6758	training	47.49	509.15	CCc1cc(C)cc(O)c1	0.185842
47.6758	training	46.682	500.85	CCc1ccc(C)c(O)c1	0.993842
41.0095	test	40.737	467.15	CCCC(C)C(CCC)C(C)C	0.272532
41.0095	training	40.546	465.15	CCCC(CC(C)CC)C(C)C	0.463532
41.0095	test	40.451	464.15	CCCC(CCC(C)C)C(C)C	0.558532
47.8379	training	47.422	510.15	Cc1ccc(C(C)C)cc1O	0.415882
47.8379	training	47.81	514.15	Cc1cc(O)cc(C(C)C)c1	0.0278823
46.9377	training	48.574	482	CCCCC(O)CCC(C)C	1.63631
46.9377	training	48.574	482	CCCCC(O)CC(C)CC	1.63631
47.4112	training	48.853	475.15	CCCCC(C)(O)CCCC	1.44177
41.6513	training	40.928	469.15	CCCC(C)C(CCC)CCC	0.723295
41.6513	training	40.737	467.15	CCCC(CCC)CC(C)CC	0.914295
41.6513	training	40.451	464.15	CCCC(CCC)CCC(C)C	1.20029
48.6383	training	48.35	515	CCCc1ccc(C)c(O)c1	0.288299
48.6383	training	49.935	531.15	CCCc1cc(C)cc(O)c1	1.2967
50.0132	training	50.99	543.16	CCc1ccc2cc(C)ccc2c1	0.976756
50.0132	validation	48.336	546.15	CCc1ccc2c(C)cccc2c1	1.67724
41.6513	training	41.119	471.15	CCCC(CC)CCCC(C)C	0.532295
41.6513	training	40.928	469.15	CCCC(C)CC(CC)CCC	0.723295
41.6513	training	41.215	472.15	CCCC(CC)CCC(C)CC	0.436295
39.5948	training	39.664	453.15	CCCC(C)CC(CC)CC	0.069195
39.5948	training	39.848	455.15	CCC(C)CCC(CC)CC	0.253195
39.5948	training	39.848	455.15	CCC(CC)CCCC(C)C	0.253195
47.6758	validation	46.341	497.35	CCc1ccc(C)cc1O	1.33484
47.6758	training	45.349	487.15	CCc1cccc(C)c1O	2.32684
51.3012	training	52.148	585.41	Cc1cccc2cc(C(C)C)ccc12	0.846814
48.6383	training	48.35	515	CCCc1cccc(C)c1O	0.288299
50.0132	training	48.142	544.15	CCc1ccc2cccc(C)c2c1	1.87124
50.0132	training	50.99	543.16	CCc1ccc2ccc(C)cc2c1	0.976756
41.6513	training	41.502	475.15	CCC(CC)CCCCC(C)C	0.149295
41.6513	training	41.31	473.15	CCC(C)CCCC(CC)CC	0.341295
41.6513	validation	41.31	473.15	CCCC(C)CCC(CC)CC	0.341295
51.3012	test	49.111	554.15	Cc1cccc2ccc(C(C)C)cc12	2.19019
50.0132	training	48.045	543.15	CCc1cccc2ccc(C)cc12	1.96824
50.0132	test	48.529	548.15	CCc1cccc2cccc(C)c12	1.48424
51.3012	training	49.207	555.15	Cc1ccc2cccc(C(C)C)c2c1	2.09419
22.565	training	22.247	249.94	C#CC	0.318006
27.7587	training	27.794	315	COCOC	0.0353323
43.1801	test	43.137	470.65	Cc1cc2ccccc2o1	0.0431462
47.9963	training	46.624	528.45	Cc1ccccc1-c1ccccc1	1.37228
47.8349	test	48.045	543.15	Cc1ccc(-c2ccccc2)cc1	0.210084
47.8349	training	48.306	545.85	Cc1cccc(-c2ccccc2)c1	0.471084
32.3957	training	32.502	365.75	CC(C)CC=O	0.106311
32.6457	validation	32.446	365.15	CCC(C)C=O	0.199677
42.4221	training	43.22	448.25	CC(C)CC(=O)O	0.797857
36.8982	training	36.88	413.15	CCC(C)COC(C)=O	0.0182258
36.3666	training	36.229	406.15	CCCC(C)OC(C)=O	0.137636
43.5032	validation	43.816	455.15	CCCC(=O)OC(C)CCC	0.312821
41.2798	training	41.638	452.15	CCCC(=O)OCCC(C)C	0.358197
41.5665	training	41.509	452.15	CCCC(=O)OCC(C)CC	0.0575291
34.96	test	34.454	393.76	CCC(C)COC=O	0.506015
34.4648	training	34.71	393.76	CCCC(C)OC=O	0.245163
40.8402	training	42.198	440.22	CCCC(C)OC(=O)CC	1.35775
39.3157	test	40.577	440.22	CCC(=O)OCC(C)CC	1.26125
45.3326	training	46.581	450.15	CCC(C)C(=O)O	1.2484
36.2377	training	36.433	429.25	CCC1CCCCC1C	0.195281
33.6154	training	33.988	401.2	CCC1CCCC1C	0.372605
28.059	training	28.679	340.16	CCC1CC1C	0.619969
33.0664	training	33.455	391.15	CC=CCC(C)CC	0.38864
33.0664	training	33.096	387.15	CC=CC(C)CCC	0.0296403
33.0664	validation	33.365	390.15	CC=CCCC(C)C	0.29864
33.6105	test	33.856	395.15	CC=C(C)CCCC	0.245533
30.4018	validation	30.434	359.46	CC=CC(C)CC	0.0321708
31.1438	test	31.446	370.41	CC=C(C)CCC	0.302158
30.4018	training	30.718	362.65	CC=CCC(C)C	0.316171
34.2967	training	35.659	421.15	CC(C)C1CCCC1C	1.36227
28.75	training	28.917	340.85	CC=C(C)CC	0.16697
27.8247	training	30.747	329.53	CC=CC(C)C	2.9223
36.2644	validation	36.387	425.73	CCCC1CCCC1C	0.122562
36.2377	test	35.712	421.15	CCC1CCCC(C)C1	0.525719
33.6154	training	33.37	394.25	CCC1CCC(C)C1	0.245395
33.0664	training	32.917	385.15	CCC=CC(C)CC	0.14936
33.0664	validation	32.917	385.15	CCCC=CC(C)C	0.14936
33.6105	training	33.856	395.15	CCC=C(C)CCC	0.245533
33.6105	training	33.766	394.15	CCCC=C(C)CC	0.155533
33.0664	training	33.186	388.15	CCC=CCC(C)C	0.11964
30.4018	training	30.407	359.15	CCC=CC(C)C	0.00517083
31.1438	training	31.28	368.55	CCC=C(C)CC	0.136158
34.2967	training	35.126	415.15	CC1CCC(C(C)C)C1	0.82927
36.2644	training	35.976	421.15	CCCC1CCC(C)C1	0.288438
36.2377	training	35.979	424.15	CCC1CCC(C)CC1	0.258719
43.1244	training	44.429	516.15	CC1CCCC2CCCCC12	1.30461
43.1244	training	41.995	489.15	CC1CCC2CCCCC2C1	1.12939
40.5905	test	41.905	488.15	CC12CCCCC1CCCC2	1.3145
26.42	test	25.428	303.45	CC1CCC1	0.992045
32.0652	test	31.823	374.08	CC1CCCCC1	0.242232
46.6316	training	46.596	439.65	CC1CCCCC1O	0.0355926
47.3365	training	48.428	444.15	CC1CCC(O)CC1	1.0915
47.3365	training	48.597	444.15	CC1CCC(O)CC1	1.2605
47.3365	validation	47.019	441.15	CC1CCCC(O)C1	0.3175
47.3365	training	47.405	441.15	CC1CCCC(O)C1	0.0685004
44.3932	training	45.951	430.15	CC1(O)CCCCC1	1.55782
46.6316	training	46.168	438.15	CC1CCCCC1O	0.463593
33.0252	test	32.466	383.45	CC1=CCCCC1	0.559175
32.0131	validation	31.772	375.62	CC1C=CCCC1	0.241107
32.0131	training	31.795	375.89	CC1CC=CCC1	0.218107
30.3969	training	30.043	345.93	CC1=CC=CC1	0.353949
29.1939	training	29.337	344.96	CC1CCCC1	0.143143
29.3004	training	28.874	343.16	CC1C=CCC1	0.426384
30.4047	training	29.054	348.95	CC1=CCCC1	1.35074
29.3004	training	29.305	348.31	CC1CC=CC1	0.00461619
23.9309	training	22.893	273.88	CC1CC1	1.03788
40.4744	training	40.756	461.05	CCCCCCC(C)CCC	0.281596
40.4744	test	40.875	462.34	CCCCCCCCC(C)C	0.400596
40.4744	training	40.95	463.15	CCCCCCCC(C)CC	0.475596
40.4744	training	40.58	459.15	CCCCCC(C)CCCC	0.105596
49.4149	training	49.062	553.65	Cc1ccccc1Cc1ccccc1	0.352942
49.4149	validation	48.94	552.39	Cc1cccc(Cc2ccccc2)c1	0.474942
49.4149	training	49.204	555.11	Cc1ccc(Cc2ccccc2)cc1	0.210942
44.4341	training	44.139	502.65	CCCCCCCCCCC(C)C	0.295101
44.4341	training	44.216	503.45	CCCCCCCCCC(C)CC	0.218101
41.5493	training	41.202	453.15	C=C(CC)C(=O)O	0.347317
29.5927	training	29.372	337.85	Cc1ccco1	0.220698
29.6912	test	29.56	338.65	Cc1ccoc1	0.131187
51.9058	training	52.123	585.15	CCCCCCCCCCCCCCCC(C)C	0.217197
51.9058	training	52.22	586.15	CCCCCCCCCCCCCCC(C)CC	0.314197
33.406	training	33.436	390.8	CCCCCC(C)C	0.0300244
33.406	training	33.877	390.86	CCCC(C)CCC	0.471024
33.406	training	34.038	392.08	CCCCC(C)CC	0.632024
50.6366	training	50.663	570.15	CCCCCCCCCCCCCCC(C)C	0.0264068
50.6366	test	50.761	571.15	CCCCCCCCCCCCCC(C)CC	0.124407
30.8394	test	31.19	365	CCCC(C)CC	0.350596
30.8394	training	31.165	363.2	CCCCC(C)C	0.325596
43.0304	training	42.059	471.65	CC1C=Cc2ccccc21	0.971356
41.7058	training	40.651	458	CC1=Cc2ccccc2C1	1.05476
45.4159	training	46.278	514.2	Cc1ccc2ccccc2c1	0.862105
45.4159	training	45.821	517.83	Cc1cccc2ccccc12	0.405105
54.1948	training	54.855	613.15	CCCCCCCCCCCCCCCCC(C)CC	0.660188
54.1948	validation	54.757	612.15	CCCCCCCCCCCCCCCCCC(C)C	0.562188
38.2564	validation	38.106	440.95	CCCCCCC(C)CC	0.150398
38.2564	training	38.138	440.15	CCCCCCCC(C)C	0.118398
38.2564	validation	38.505	438.85	CCCCCC(C)CCC	0.248602
38.2564	training	37.984	438.3	CCCCC(C)CCCC	0.272398
53.0885	training	53.585	600.15	CCCCCCCCCCCCCCCC(C)CC	0.496547
53.0885	training	53.487	599.15	CCCCCCCCCCCCCCCCC(C)C	0.398547
35.8918	training	36.426	416.43	CCCCCCC(C)C	0.534213
35.8918	training	36.401	417.38	CCCCCC(C)CC	0.509213
35.8918	training	36.186	415.59	CCCCC(C)CCC	0.294213
49.2687	test	49.207	555.15	CCCCCCCCCCCCC(C)CC	0.0617378
49.2687	training	49.169	554.75	CCCCCCCCCCCCCC(C)C	0.0997378
35.4717	training	35.445	395.15	CC(C)CCC=O	0.0266902
35.4717	training	35.445	395.15	CCC(C)CC=O	0.0266902
35.5307	training	34.976	390.15	CCCC(C)C=O	0.554733
28.2472	test	28.262	336.42	CCC(C)CC	0.0147632
28.2472	training	27.942	333.41	CCCC(C)C	0.305237
38.8155	training	39.462	445.93	C=Cc1ccc(C)cc1	0.646496
38.8155	training	40.057	442.96	C=Cc1ccccc1C	1.2415
38.8155	validation	39.424	444.75	C=Cc1cccc(C)c1	0.608496
47.7886	training	47.581	538.35	CCCCCCCCCCCCC(C)C	0.207609
47.7886	training	47.687	539.45	CCCCCCCCCCCC(C)CC	0.101609
34.2809	training	35.606	411.15	CC1CCOC1	1.32505
30.7729	training	30.43	353.37	CC1CCCO1	0.342903
36.2377	validation	36.041	424.85	CCC1CCCCC1C	0.196719
33.6154	training	33.379	394.35	CCC1CCCC1C	0.236395
28.059	training	27.941	331.81	CCC1CC1C	0.118031
33.6105	training	33.856	395.15	CC=C(C)CCCC	0.245533
33.0664	validation	33.096	387.15	CC=CC(C)CCC	0.0296403
33.0664	training	33.455	391.15	CC=CCC(C)CC	0.38864
33.0664	training	33.365	390.15	CC=CCCC(C)C	0.29864
31.1438	training	31.261	368.33	CC=C(C)CCC	0.117158
30.4018	training	30.594	361.26	CC=CCC(C)C	0.192171
30.4018	training	30.545	360.71	CC=CC(C)CC	0.143171
34.2967	training	35.038	414.15	CC(C)C1CCCC1C	0.74127
28.75	validation	29.288	343.6	CC=C(C)CC	0.53797
27.8247	training	27.849	331.75	CC=CC(C)C	0.024297
36.2644	training	35.83	419.52	CCCC1CCCC1C	0.434438
36.2377	training	35.979	424.15	CCC1CCCC(C)C1	0.258719
33.6154	validation	33.37	394.25	CCC1CCC(C)C1	0.245395
33.6105	training	33.856	395.15	CCC=C(C)CCC	0.245533
33.0664	training	33.186	388.15	CCC=CCC(C)C	0.11964
33.0664	training	32.917	385.15	CCC=CC(C)CC	0.14936
33.6105	training	33.766	394.15	CCCC=C(C)CC	0.155533
33.0664	training	32.917	385.15	CCCC=CC(C)C	0.14936
30.4018	training	30.398	359.05	CCC=CC(C)C	0.00382917
31.1438	training	31.115	366.69	CCC=C(C)CC	0.0288422
34.2967	training	35.126	415.15	CC1CCC(C(C)C)C1	0.82927
36.2644	training	35.976	421.15	CCCC1CCC(C)C1	0.288438
36.2377	training	35.712	421.15	CCC1CCC(C)CC1	0.525719
43.1244	training	43.707	508.15	CC1CCCC2CCCCC12	0.582615
40.5905	training	41.006	478.15	CC12CCCCC1CCCC2	0.415503
43.1244	training	41.275	481.15	CC1CCC2CCCCC2C1	1.84939
46.1817	training	45.91	521.05	CCCCCCCCCCCC(C)C	0.271745
46.1817	training	45.987	521.85	CCCCCCCCCCC(C)CC	0.194745
42.534	training	41.884	479.15	CCCCCCC(C)CCCC	0.649951
42.534	training	41.884	479.15	CCCCCC(C)CCCCC	0.649951
42.534	test	42.172	482.15	CCCCCCCC(C)CCC	0.361951
42.534	test	42.268	483.15	CCCCCCCCC(C)CC	0.265951
42.534	training	42.186	484	CCCCCCCCCC(C)C	0.347951
42.359	training	46.344	491.14	c1ccc2ccccc2c1	3.98496
24.5581	training	22.744	282.65	CC(C)(C)C	1.81408
37.0514	training	35.017	401.15	CC(=O)OCC(C)(C)C	2.03441
57.0051	training	62.145	483	CC(C)(CO)CO	5.13986
65.2019	training	64.776	713.95	CCCCCCCCCCCCCCCCCCCCCCCCCCCCC	0.425865
64.8891	training	64.697	713.15	C=CCCCCCCCCCCCCCCCCCCCCCCCCCCC	0.192068
70.0067	training	69.763	764.15	CCCCCCCCCCCCCCCCCCCCCCCCCCCCCc1ccccc1	0.243719
69.916	training	70.161	768.15	CCCCCCCCCCCCCCCCCCCCCCCCCCCCCC1CCCCC1	0.244977
69.4923	training	69.364	760.15	CCCCCCCCCCCCCCCCCCCCCCCCCCCCCC1CCCC1	0.12834
64.3459	training	64.4	710.15	C#CCCCCCCCCCCCCCCCCCCCCCCCCCCC	0.0540593
55.463	test	55.834	623.15	CCCCCCCCCCCCCCCCCCC=O	0.370976
54.6206	training	56.073	603.05	CCCCCCCCCCCCCCCCCCC	1.4524
63.0975	training	64.499	711.15	CCCCCCCCCCCCCCCC(O)CCCO	1.40153
61.2486	training	62.423	690.15	CCCCCCCCCCCCCCCCC(O)CCO	1.17435
60.2978	training	61.337	679.15	CCCCCCCCCCCCCCCCCC(O)CO	1.03917
63.2833	test	65.888	659.15	CCCCCCCCCCCCCCCCCCC(=O)O	2.60472
65.6509	validation	70.534	631	CCCCCCCCCCCCCCCCCCCO	4.88312
55.7847	test	56.225	627.15	CCCCCCCCCCCCCCCCCC(C)O	0.440268
55.0387	training	55.148	616.15	CCCCCCCCCCCCCCCCCC(C)=O	0.109269
67.3609	training	100.517	645	CCCCCCCCCCCCCCCCCCCOC(C)=O	33.1561
70.8428	training	71.728	783.86	CCCCCCCCCCCCCCCCCCCOC(=O)CCC	0.885195
64.5471	training	64.833	714.52	CCCCCCCCCCCCCCCCCCCOC=O	0.285933
68.5948	training	69.447	760.98	CCCCCCCCCCCCCCCCCCCOC(=O)CC	0.852233
62.1687	validation	61.732	683.15	CCCCCCCCCCCCCCCCCCCc1ccccc1	0.436692
61.6608	training	61.929	685.15	CCCCCCCCCCCCCCCCCCCC1CCCCC1	0.268189
60.9372	training	60.745	673.15	CCCCCCCCCCCCCCCCCCCC1CCCC1	0.192241
53.986	training	54.757	612.15	CC#CCCCCCCCCCCCCCCCC	0.77099
53.986	training	53.585	600.15	CCC#CCCCCCCCCCCCCCCC	0.40101
55.7194	training	57.463	600.16	C#CCCCCCCCCCCCCCCCCC	1.74357
85.8928	training	85.729	923.15	CCCCCCCCCCCCCCCCCCCCCCCCCCCCCCCCCCCCCCCCCCCCCCCCCCCCCCCCCCCCCCCCCCCCC	0.163798
44.4975	test	44.25	468.15	CCCCCCCCC=O	0.247533
37.1584	training	37.149	423.97	CCCCCCCCC	0.0093908
63.0676	training	66.557	558.15	OCCCCCCCCCO	3.48944
63.2162	training	67.581	571.15	CCCCCC(O)CCCO	4.3648
61.4918	training	63.665	539.15	CCCCCCCC(O)CO	2.17315
61.6815	training	65.01	550.15	CCCCCCC(O)CCO	3.3285
57.4057	training	57.713	528.75	CCCCCCCCC(=O)O	0.307344
51.5113	training	45.395	486.25	CCCCCCCCCO	6.1163
[truncated: 875 more rows]

## Sheet: Literature_2_GAT
Pred_ours	HoV (kJ/mol)	Train/Valid/Test	smiles	temperature	AE
21.4785	22.247	Train	C#CC	249.94	0.768454
25.7734	25.479	Train	C#CC(C)(C)C	310.87	0.29443
28.6356	28.405	Train	C#CC(C)(C)CC	343.15	0.23065
25.5275	26.02	Train	C#CC(C)C	302.15	0.492527
29.8182	29.558	Train	C#CC(C)C(C)C	353.15	0.260218
27.9304	27.7	Train	C#CC(C)CC	330.85	0.230428
30.4824	30.261	Train	C#CC(C)CCC	358.15	0.221439
30.37	30.173	Train	C#CC(CC)CC	357.15	0.197018
23.8099	23.792	Train	C#CC=C	278.25	0.017929
24.0563	24.522	Train	C#CCC	281.22	0.465651
29.1565	28.934	Train	C#CCC(C)(C)C	349.23	0.222517
26.8535	26.285	Train	C#CCC=C	315.65	0.568489
32.2618	31.878	Train	C#CCCCCC	372.86	0.38378
37.2334	37.12	Train	C#CCCCCCCC	423.96	0.11339
45.076	46.673	Train	C#CCCCCCCCCCCC	507.16	1.59703
46.727	46.306	Train	C#CCCCCCCCCCCCC	525.15	0.42099
48.2014	50.869	Train	C#CCCCCCCCCCCCCC	541.16	2.66762
49.7144	52.802	Train	C#CCCCCCCCCCCCCCC	557.16	3.0876
51.1319	54.58	Train	C#CCCCCCCCCCCCCCCC	572.16	3.44814
52.4545	56.095	Train	C#CCCCCCCCCCCCCCCCC	586.16	3.64048
53.7767	57.463	Train	C#CCCCCCCCCCCCCCCCCC	600.16	3.68629
55.0043	58.526	Train	C#CCCCCCCCCCCCCCCCCCC	613.16	3.52168
56.3248	56.225	Train	C#CCCCCCCCCCCCCCCCCCCC	627.15	0.099837
57.4577	57.402	Train	C#CCCCCCCCCCCCCCCCCCCCC	639.15	0.055687
58.5903	58.58	Train	C#CCCCCCCCCCCCCCCCCCCCCC	651.15	0.01034
60.5724	60.647	Train	C#CCCCCCCCCCCCCCCCCCCCCCCC	672.15	0.074605
61.5161	61.633	Train	C#CCCCCCCCCCCCCCCCCCCCCCCCC	682.15	0.11692
62.5199	62.62	Train	C#CCCCCCCCCCCCCCCCCCCCCCCCCC	692.15	0.10008
63.4299	63.51	Train	C#CCCCCCCCCCCCCCCCCCCCCCCCCCC	701.15	0.080118
64.3429	64.4	Train	C#CCCCCCCCCCCCCCCCCCCCCCCCCCCC	710.15	0.05708
66.1717	66.184	Train	C#CCCCCCCCCCCCCCCCCCCCCCCCCCCCCC	728.15	0.012255
66.9898	66.978	Train	C#CCCCCCCCCCCCCCCCCCCCCCCCCCCCCCC	736.15	0.011815
67.8052	67.773	Train	C#CCCCCCCCCCCCCCCCCCCCCCCCCCCCCCCC	744.15	0.032214
68.5211	68.469	Train	C#CCCCCCCCCCCCCCCCCCCCCCCCCCCCCCCCC	751.15	0.052065
69.3326	69.265	Train	C#CCCCCCCCCCCCCCCCCCCCCCCCCCCCCCCCCC	759.15	0.06758
70.0456	69.962	Train	C#CCCCCCCCCCCCCCCCCCCCCCCCCCCCCCCCCCC	766.15	0.08363
71.4682	71.358	Train	C#CCCCCCCCCCCCCCCCCCCCCCCCCCCCCCCCCCCCC	780.15	0.11019
72.0797	71.957	Train	C#CCCCCCCCCCCCCCCCCCCCCCCCCCCCCCCCCCCCCC	786.15	0.12269
72.7872	72.656	Train	C#CCCCCCCCCCCCCCCCCCCCCCCCCCCCCCCCCCCCCCC	793.15	0.13121
42.0166	42.329	Train	C#CCO	386.75	0.31239
36.8064	36.25	Train	C#Cc1ccccc1	416.2	0.55635
51.1588	50.945	Train	C(#Cc1ccccc1)c1ccccc1	573	0.213836
66.4734	63.073	Train	C(=C(c1ccccc1)c1ccccc1)c1ccccc1	669	3.40043
47.5009	48.002	Train	C(=Cc1ccccc1)c1ccccc1	535	0.501054
52.3938	54.871	Train	C(=Cc1ccccc1)c1ccccc1	579.65	2.47716
74.5129	73.07	Train	C/C(=C/C(=O)O)C(=O)O	607	1.44294
33.2858	34.805	Train	C/C=C/C=O	377.25	1.51923
38.5682	38.45	Train	C1=CC2C3C=CC(C3)C2C1	443.15	0.11821
31.35	30.141	Train	C1=CC2CCC1C2	368.65	1.20904
36.3835	36.401	Train	C1=CC=CC=CC=C1	413.16	0.01753
33.8044	35.317	Train	C1=CC=CCC=C1	388.65	1.51261
24.5059	25.807	Train	C1=CCC1	275.75	1.30109
27.4885	25.76	Train	C1=CCC=C1	314.65	1.72851
27.5753	27.6	Train	C1=CCCC1	317.38	0.024742
30.6743	30.591	Train	C1=CCCC=C1	353.49	0.083328
36.8846	37.454	Train	C1=CCCC=CCC1	423.27	0.56941
30.7868	31.11	Train	C1=CCCCC1	356.12	0.3232
30.3173	30.391	Train	C1=CCOC1	339	0.073705
40.2029	40.939	Train	C1=Cc2ccccc2C1	455.77	0.73611
46.238	46.383	Train	C1CCC(CC2CCCCC2)CC1	525.95	0.14501
25.0852	23.982	Train	C1CCC1	285.66	1.10318
40.3325	39.801	Train	C1CCC2CCCCC2C1	468.97	0.53148
33.8358	33.547	Train	C1CCCCCC1	391.94	0.28884
36.5352	35.92	Train	C1CCCCCCC1	424.3	0.61524
38.8381	38.745	Train	C1CCCCCCCC1	451.55	0.093062
41.0604	40.704	Train	C1CCCCCCCCC1	475.15	0.35641
42.8496	42.13	Train	C1CCCCCCCCCC1	494.15	0.719586
44.6752	45.053	Train	C1CCCCCCCCCCC1	512.15	0.37782
46.4596	46.692	Train	C1CCCCCCCCCCCC1	529.15	0.232398
48.0341	48.142	Train	C1CCCCCCCCCCCCC1	544.15	0.107916
49.6076	49.595	Train	C1CCCCCCCCCCCCCC1	559.15	0.01258
51.0748	50.955	Train	C1CCCCCCCCCCCCCCC1	573.15	0.119768
52.3262	52.22	Train	C1CCCCCCCCCCCCCCCC1	586.15	0.106225
53.437	53.39	Train	C1CCCCCCCCCCCCCCCCC1	598.15	0.04703
54.5478	54.562	Train	C1CCCCCCCCCCCCCCCCCC1	610.15	0.01415
55.5662	55.638	Train	C1CCCCCCCCCCCCCCCCCCC1	621.15	0.071846
30.0948	30.26	Train	C1CCOC1	338	0.165151
25.7679	25.697	Train	C1CO1	283.85	0.070857
34.3347	34.3	Train	C1COCCO1	374.47	0.03467
37.49	37.481	Train	C1COOOC1	387.65	0.00901
13.4251	13.463	Train	C=C	169.47	0.037858
31.8539	31.747	Train	C=C(C(C)C)C(C)C	377.15	0.106867
22.4571	22.213	Train	C=C(C)C	266.25	0.244113
28.8342	28.911	Train	C=C(C)C(=C)C	341.93	0.076796
42.6396	33.22	Train	C=C(C)C(=O)O	434.15	9.41956
37.4189	37.627	Train	C=C(C)C(=O)OCCC	414	0.208055
39.3568	40.2	Train	C=C(C)C(=O)OCCCC	434	0.84319
29.1344	29.291	Train	C=C(C)C(C)(C)C	351.04	0.156593
31.9124	31.816	Train	C=C(C)C(C)(C)CC	381.46	0.096437
32.9565	32.655	Train	C=C(C)C(C)=O	371.15	0.30149
27.5517	27.472	Train	C=C(C)C(C)C	328.76	0.079725
30.0682	30.096	Train	C=C(C)C(C)CC	357.43	0.027835
32.6341	32.61	Train	C=C(C)C(C)CCC	383.65	0.024117
32.586	32.566	Train	C=C(C)C(CC)CC	383.15	0.020006
38.8286	39.141	Train	C=C(C)C1CC=C(C)CC1	449.65	0.312356
29.4348	29.297	Train	C=C(C)C=CC	349.15	0.137822
25.865	25.585	Train	C=C(C)CC	304.3	0.280032
44.3046	40.677	Train	C=C(C)CC(=O)O	450	3.62759
31.3555	30.985	Train	C=C(C)CC(C)(C)C	374.59	0.370541
29.8786	29.86	Train	C=C(C)CC(C)C	354.76	0.01863
32.6941	32.673	Train	C=C(C)CC(C)CC	384.35	0.02106
28.2532	28.355	Train	C=C(C)CCC	335.25	0.101832
32.7369	32.708	Train	C=C(C)CCC(C)C	384.75	0.0289
31.0077	31.083	Train	C=C(C)CCCC	364.99	0.075311
33.7607	33.696	Train	C=C(C)CCCCC	392.45	0.06474
36.257	36.209	Train	C=C(C)CCCCCC	417.8	0.048034
40.6565	40.921	Train	C=C(C)CCCCCCCC	463.85	0.264513
44.5371	44.312	Train	C=C(C)CCCCCCCCCC	504.45	0.225064
46.2905	46.113	Train	C=C(C)CCCCCCCCCCC	523.15	0.177543
47.8825	47.755	Train	C=C(C)CCCCCCCCCCCC	540.15	0.127492
49.5037	49.401	Train	C=C(C)CCCCCCCCCCCCC	557.15	0.10267
51.0277	50.955	Train	C=C(C)CCCCCCCCCCCCCC	573.15	0.07267
53.7874	53.78	Train	C=C(C)CCCCCCCCCCCCCCCC	602.15	0.007407
55.0239	55.051	Train	C=C(C)CCCCCCCCCCCCCCCCC	615.15	0.027147
40.4267	40.43	Train	C=C(C)c1ccc(C)cc1	459.15	0.003277
40.3048	40.338	Train	C=C(C)c1cccc(C)c1	458.15	0.03317
38.4864	38.543	Train	C=C(C)c1ccccc1	438.65	0.05663
39.1166	39.159	Train	C=C(C)c1ccccc1C	445.35	0.04237
73.3116	72.074	Train	C=C(CC(=O)O)C(=O)O	601	1.23763
44.7606	41.202	Train	C=C(CC)C(=O)O	453.15	3.55861
32.136	31.964	Train	C=C(CC)C(C)(C)C	383.15	0.17195
30.2428	30.28	Train	C=C(CC)C(C)C	359.52	0.037153
32.7016	32.7	Train	C=C(CC)C(C)CC	384.65	0.00159
28.4604	28.348	Train	C=C(CC)CC	337.82	0.112358
32.6704	32.593	Train	C=C(CC)CC(C)C	383.45	0.077395
31.2163	31.328	Train	C=C(CC)CCC	367.15	0.111688
33.8411	34.113	Train	C=C(CC)CCCC	393.15	0.27186
32.9089	32.833	Train	C=C(CCC)C(C)C	386.15	0.07594
33.6605	33.552	Train	C=C(CCC)CCC	390.85	0.10853
36.9397	36.318	Train	C=C1C2CCC(C2)C1(C)C	433.65	0.621728
38.7807	39.502	Train	C=C1C=CC(C(C)C)CC1	447.15	0.721265
37.0875	38.82	Train	C=C1CC(=O)O1	399.2	1.7325
37.5649	37.828	Train	C=C1CCC2CC1C2(C)C	439.19	0.26308
19.3946	20.599	Train	C=C=C	238.65	1.20443
26.4441	26.657	Train	C=C=C(C)C	314	0.212893
28.9039	28.856	Train	C=C=C(C)CC	343.15	0.047858
24.1214	24.22	Train	C=C=CC	284	0.098618
26.8142	26.886	Train	C=C=CCC	318.01	0.071812
29.6201	29.609	Train	C=C=CCCC	349.15	0.011079
19.1923	19.39	Train	C=C=O	223.34	0.197743
27.999	27.88	Train	C=CC#CC	332.4	0.118993
25.9168	26.066	Train	C=CC(=C)C	307.22	0.149233
29.348	29.277	Train	C=CC(=C)CC	348.15	0.07103
42.9395	42.52	Train	C=CC(=O)O	414.15	0.419507
31.8569	32.211	Train	C=CC(=O)OC	353.35	0.354116
33.653	33.725	Train	C=CC(=O)OCC	372.65	0.072046
36.3512	37.562	Train	C=CC(=O)OCC(C)C	405.15	1.21077
46.4619	45.61	Train	C=CC(=O)OCC(CC)CCCC	489.15	0.85193
35.4259	36.515	Train	C=CC(=O)OCCC	392.15	1.0891
38.3515	37.464	Train	C=CC(=O)OCCCC	421	0.8875
53.2307	53.893	Train	C=CC(=O)OCCO	484	0.662276
25.9976	25.925	Train	C=CC(C)(C)C	314.4	0.072622
31.6704	31.489	Train	C=CC(C)(C)C(C)C	378.15	0.181391
32.554	32.383	Train	C=CC(C)(CC)CC	385.15	0.171024
29.4813	29.385	Train	C=CC(C)=CC	350.15	0.096327
29.4813	29.385	Train	C=CC(C)=CC	350.15	0.096335
24.77	24.386	Train	C=CC(C)C	293.21	0.383997
45.7481	40.626	Train	C=CC(C)C(=O)O	450	5.1221
31.5538	31.401	Train	C=CC(C)C(C)(C)C	377.15	0.152848
29.7254	29.752	Train	C=CC(C)C(C)C	353.95	0.026624
32.7315	32.704	Train	C=CC(C)C(C)CC	385.15	0.0275
27.5158	27.481	Train	C=CC(C)C=C	328.15	0.034812
27.464	27.301	Train	C=CC(C)CC	327.33	0.162959
32.0206	31.992	Train	C=CC(C)CC(C)C	377.15	0.02863
30.2046	30.731	Train	C=CC(C)CCC	357.05	0.52644
32.9529	32.909	Train	C=CC(C)CCCC	384.15	0.043934
32.3602	32.303	Train	C=CC(CC)C(C)C	380.65	0.05722
32.8607	32.846	Train	C=CC(CC)CCC	383.45	0.014672
34.3247	35.215	Train	C=CC1=CCCCC1	401	0.890285
26.5428	26.569	Train	C=CC=CC	315.17	0.026237
26.7218	26.695	Train	C=CC=CC	317.22	0.026794
29.2917	29.253	Train	C=CC=CCC	346.15	0.03868
27.2983	27.074	Train	C=CCC(=C)C	323.15	0.224344
45.4019	40.049	Train	C=CCC(=O)O	442.15	5.35287
32.0962	31.96	Train	C=CCC(C)(C)CC	380.35	0.136172
27.4822	27.414	Train	C=CCC(C)C	327.01	0.068178
30.463	30.623	Train	C=CCC(C)CC	359.88	0.15997
33.0994	33.07	Train	C=CCC(C)CCC	385.95	0.029396
32.8126	32.819	Train	C=CCC(CC)CC	383.15	0.006355
25.1484	24.491	Train	C=CCC=C	299.11	0.657415
28.5906	28.544	Train	C=CCC=CC	338.15	0.046576
25.4566	25.705	Train	C=CCCC	303.11	0.248411
46.9125	42.066	Train	C=CCCC(=O)O	461.15	4.84646
31.7163	31.546	Train	C=CCCC(C)(C)C	375.65	0.170282
30.3875	30.419	Train	C=CCCC(C)C	358.46	0.031484
28.6799	28.642	Train	C=CCCCC	336.63	0.03791
33.2049	33.106	Train	C=CCCCC(C)C	386.35	0.098903
31.5904	31.739	Train	C=CCCCCC	366.79	0.14861
34.3191	34.387	Train	C=CCCCCCC	394.44	0.067946
36.8203	37.025	Train	C=CCCCCCCC	420.02	0.20471
39.0721	39.358	Train	C=CCCCCCCCC	443.75	0.285887
41.1778	41.728	Train	C=CCCCCCCCCC	465.82	0.550193
43.121	43.704	Train	C=CCCCCCCCCCC	486.5	0.582983
44.9278	46.095	Train	C=CCCCCCCCCCCC	505.93	1.16715
48.2109	49.335	Train	C=CCCCCCCCCCCCCC	541.61	1.12412
49.7646	52.028	Train	C=CCCCCCCCCCCCCCC	558.02	2.26343
51.2271	53.555	Train	C=CCCCCCCCCCCCCCCC	573.48	2.3279
52.5975	55.597	Train	C=CCCCCCCCCCCCCCCCC	587.97	2.9995
56.3955	56.323	Train	C=CCCCCCCCCCCCCCCCCCCC	628.15	0.07252
57.5294	57.5	Train	C=CCCCCCCCCCCCCCCCCCCCC	640.15	0.029434
58.663	58.679	Train	C=CCCCCCCCCCCCCCCCCCCCCC	652.15	0.015975
59.7021	59.76	Train	C=CCCCCCCCCCCCCCCCCCCCCCC	663.15	0.05786
60.741	60.844	Train	C=CCCCCCCCCCCCCCCCCCCCCCCC	674.15	0.102995
61.6854	61.83	Train	C=CCCCCCCCCCCCCCCCCCCCCCCCC	684.15	0.144575
62.6297	62.818	Train	C=CCCCCCCCCCCCCCCCCCCCCCCCCC	694.15	0.1883
63.5295	63.708	Train	C=CCCCCCCCCCCCCCCCCCCCCCCCCCC	703.15	0.178528
64.551	64.697	Train	C=CCCCCCCCCCCCCCCCCCCCCCCCCCCC	713.15	0.146
65.4048	65.49	Train	C=CCCCCCCCCCCCCCCCCCCCCCCCCCCCC	721.15	0.08522
66.3414	66.383	Train	C=CCCCCCCCCCCCCCCCCCCCCCCCCCCCCC	730.15	0.04163
67.159	67.177	Train	C=CCCCCCCCCCCCCCCCCCCCCCCCCCCCCCC	738.15	0.01798
67.9749	67.972	Train	C=CCCCCCCCCCCCCCCCCCCCCCCCCCCCCCCC	746.15	0.002884
69.6009	69.564	Train	C=CCCCCCCCCCCCCCCCCCCCCCCCCCCCCCCCCC	762.15	0.0369
70.3144	70.261	Train	C=CCCCCCCCCCCCCCCCCCCCCCCCCCCCCCCCCCC	769.15	0.053445
71.0266	70.959	Train	C=CCCCCCCCCCCCCCCCCCCCCCCCCCCCCCCCCCCC	776.15	0.06761
71.7375	71.657	Train	C=CCCCCCCCCCCCCCCCCCCCCCCCCCCCCCCCCCCCC	783.15	0.08049
72.4468	72.356	Train	C=CCCCCCCCCCCCCCCCCCCCCCCCCCCCCCCCCCCCCC	790.15	0.09085
73.0572	72.956	Train	C=CCCCCCCCCCCCCCCCCCCCCCCCCCCCCCCCCCCCCCC	796.15	0.101205
40.4975	39.8	Train	C=CCO	370.23	0.69745
52.6906	54.209	Train	C=CCOC(=O)/C=C\C(=O)OCC=C	520	1.51839
34.1189	33.531	Train	C=CCOC(C)=O	377.15	0.58786
37.7418	37.391	Train	C=CCc1ccccc1	428.95	0.350764
24.0004	25.053	Train	C=COC	278.65	1.05256
31.323	31.31	Train	C=COC(C)=O	345.65	0.013013
26.2341	26.759	Train	C=COC=C	301.45	0.524936
32.4017	32.896	Train	C=COCCCC	366.97	0.49426
41.1541	40.853	Train	C=Cc1c(C)cccc1C	465.57	0.30109
41.1541	40.853	Train	C=Cc1c(C)cccc1C	465.57	0.301102
41.116	40.853	Train	C=Cc1cc(C)cc(C)c1	465.57	0.263043
41.116	40.853	Train	C=Cc1cc(C)cc(C)c1	465.57	0.26304
41.2226	40.909	Train	C=Cc1cc(C)ccc1C	466.18	0.313626
41.2226	40.909	Train	C=Cc1cc(C)ccc1C	466.18	0.31362
41.1617	40.853	Train	C=Cc1ccc(C)c(C)c1	465.57	0.308728
41.1617	40.853	Train	C=Cc1ccc(C)c(C)c1	465.57	0.308736
39.3333	39.462	Train	C=Cc1ccc(C)cc1	445.93	0.128656
42.0796	41.744	Train	C=Cc1ccc(C)cc1C	475.26	0.335617
42.0796	41.744	Train	C=Cc1ccc(C)cc1C	475.26	0.33562
41.2447	40.904	Train	C=Cc1ccc(CC)cc1	465.45	0.340743
41.15	40.853	Train	C=Cc1cccc(C)c1C	465.57	0.29697
40.9592	40.697	Train	C=Cc1cccc(CC)c1	463.2	0.262244
39.0568	40.057	Train	C=Cc1ccccc1C	442.96	1.00018
40.7193	40.443	Train	C=Cc1ccccc1CC	460.44	0.276322
23.1725	23.16	Train	C=O	254.05	0.012457
14.6822	14.689	Train	CC	184.55	0.00678
24.9901	26.43	Train	CC#CC	300.13	1.43994
29.5308	29.387	Train	CC#CC(C)(C)C	356.15	0.143766
29.088	28.91	Train	CC#CC(C)C	346.28	0.178017
27.6309	29.246	Train	CC#CCC	329.22	1.61511
30.3024	30.911	Train	CC#CCCC	357.67	0.608573
33.0631	32.775	Train	CC#CCCCC	385.15	0.288057
35.5578	35.275	Train	CC#CCCCCC	410.88	0.2828
37.8515	37.68	Train	CC#CCCCCCC	435.05	0.17153
40.057	39.994	Train	CC#CCCCCCCC	457.75	0.062995
42.1058	42.224	Train	CC#CCCCCCCCC	479.15	0.118188
44.0127	43.802	Train	CC#CCCCCCCCCC	499.15	0.21068
45.8063	45.631	Train	CC#CCCCCCCCCCC	518.15	0.175282
50.6436	50.566	Train	CC#CCCCCCCCCCCCCC	569.15	0.077578
52.0727	52.025	Train	CC#CCCCCCCCCCCCCCC	584.15	0.047685
53.4058	53.39	Train	CC#CCCCCCCCCCCCCCCC	598.15	0.01577
54.7373	54.757	Train	CC#CCCCCCCCCCCCCCCCC	612.15	0.0197
55.9734	56.029	Train	CC#CCCCCCCCCCCCCCCCCC	625.15	0.055608
45.39	45.74	Train	CC(=O)C(=O)O	438.15	0.34998
32.4251	33.721	Train	CC(=O)C(C)C	367.55	1.29594
35.8163	35.911	Train	CC(=O)C(C)C(C)C	405.15	0.09467
35.6699	36.086	Train	CC(=O)C=C(C)C	402.95	0.416093
34.7528	34.903	Train	CC(=O)CC(C)(C)C	398.15	0.150177
39.026	40.828	Train	CC(=O)CC(C)=O	413.55	1.80204
34.4661	35.816	Train	CC(=O)CC(C)C	389.65	1.34989
55.8104	52.639	Train	CC(=O)CCC(=O)O	518.95	3.17142
37.1225	38.431	Train	CC(=O)CCC(C)C	417.95	1.3085
32.6305	32.577	Train	CC(=O)OC(C)(C)C	369.15	0.05351
39.7941	40.83	Train	CC(=O)OC(C)=O	411.78	1.0359
32.5108	32.228	Train	CC(=O)OC(C)C	361.65	0.282773
36.0296	35.561	Train	CC(=O)OC(C)C(C)C	401.65	0.468587
44.1417	46.86	Train	CC(=O)OC(C)OC(C)=O	442.15	2.7183
35.5635	35.017	Train	CC(=O)OCC(C)(C)C	401.15	0.546454
34.9024	35.877	Train	CC(=O)OCC(C)C	389.8	0.974633
37.3092	37.603	Train	CC(=O)OCCC(C)C	415.25	0.293826
46.4555	45.368	Train	CC(=O)OCCOC(C)=O	463.65	1.08752
44.5624	44.583	Train	CC(=O)OCc1ccccc1	486.65	0.020557
43.4746	44.253	Train	CC(=O)c1ccccc1	475.15	0.778394
36.6755	35.313	Train	CC(C(C)(C)C)C(C)(C)C	432.45	1.3625
43.3247	43.023	Train	CC(C(C)(C)C)C(C)(C)O	453	0.301707
40.0225	40.355	Train	CC(C(C)C(C)(C)C)C(C)(C)C	463.15	0.332493
23.3291	22.744	Train	CC(C)(C)C	282.65	0.585079
42.4126	41.085	Train	CC(C)(C)C(=O)O	436.95	1.32764
31.345	31.422	Train	CC(C)(C)C(C)(C)C	379.6	0.076964
40.2499	38.4	Train	CC(C)(C)C(C)(C)C(C)(C)C	467.15	1.84987
43.0449	42.464	Train	CC(C)(C)C(C)(C)CO	446	0.580918
37.9473	38.066	Train	CC(C)(C)C(C)(C)O	404.15	0.11867
41.6564	41.75	Train	CC(C)(C)C(O)C(C)(C)C	440.15	0.093567
53.5658	54.012	Train	CC(C)(C)C(O)CO	478.65	0.446196
29.691	30.183	Train	CC(C)(C)C=O	347.15	0.49204
33.0775	32.536	Train	CC(C)(C)CC(C)(C)C	395.44	0.541526
40.497	40.833	Train	CC(C)(C)CC(C)(C)C(C)(C)C	468.15	0.335953
39.7557	39.839	Train	CC(C)(C)CC(C)(C)O	419.55	0.08334
54.7067	54.508	Train	CC(C)(C)CC(C)(C)c1ccc(O)cc1	563.6	0.198703
57.9352	58.799	Train	CC(C)(C)CC(O)CO	517.03	0.86381
32.5481	33.102	Train	CC(C)(C)CC=O	377.15	0.55393
34.6496	35.271	Train	CC(C)(C)CCC(C)(C)C	410.63	0.621384
37.2932	36.7	Train	CC(C)(C)CCCC(C)(C)C	436.15	0.59323
48.4601	48.37	Train	CC(C)(C)CCCCCCO	485	0.090068
46.0808	44.705	Train	CC(C)(C)CCCCO	455	1.37578
40.7884	39.669	Train	CC(C)(C)CCO	416.15	1.11937
37.9487	41.35	Train	CC(C)(C)CO	386.25	3.40133
34.0194	33.771	Train	CC(C)(C)COC=O	390.97	0.248405
40.1943	39.647	Train	CC(C)(C)Cc1ccccc1	459.15	0.547286
34.3683	54.182	Train	CC(C)(C)O	355.57	19.8137
30.847	30.604	Train	CC(C)(C)OC=O	355.95	0.243004
38.327	39.921	Train	CC(C)(C)OO	405.5	1.59398
33.1639	33.576	Train	CC(C)(C)OOC(C)(C)C	384.15	0.41213
57.1572	61.147	Train	CC(C)(C)c1ccc(O)c(O)c1	558	3.98985
48.7393	48.849	Train	CC(C)(C)c1cccc2ccccc12	551.45	0.109666
45.8468	45.334	Train	CC(C)(C)c1ccccc1O	497.23	0.51277
55.6158	56.686	Train	CC(C)(CCO)CCO	494.25	1.07017
56.6011	56.686	Train	CC(C)(CO)CCCO	494.25	0.08493
54.8915	54.17	Train	CC(C)(CO)CCO	480	0.72152
56.472	62.145	Train	CC(C)(CO)CO	483	5.67304
56.472	62.145	Train	CC(C)(CO)CO	483	5.67304
48.9691	49.089	Train	CC(C)(O)C(C)(C)O	445.95	0.11993
57.184	56.686	Train	CC(C)(O)CCCCO	494.25	0.49802
54.5763	53.616	Train	CC(C)(O)CCO	472.15	0.96026
52.9014	50.808	Train	CC(C)(O)CO	451.15	2.09344
40.4191	44.522	Train	CC(C)(OO)c1ccccc1	442.7	4.10294
71.8464	51.265	Train	CC(C)(OOC(C)(C)c1ccccc1)c1ccccc1	669	20.5814
69.4293	72.178	Train	CC(C)(c1ccc(O)cc1)c1ccc(O)cc1	633.65	2.74865
54.5588	52.991	Train	CC(C)(c1ccccc1)C(C)(C)c1ccccc1	589	1.56778
61.236	61.17	Train	CC(C)(c1ccccc1)c1ccc(O)cc1	608.15	0.06599
49.135	49.129	Train	CC(C)(c1ccccc1)c1ccccc1	554.34	0.005956
50.8719	50.761	Train	CC(C)(c1ccccc1)c1ccccc1	571.15	0.110933
29.2019	29.408	Train	CC(C)=C(C)C	346.35	0.20608
46.586	42.292	Train	CC(C)=CC(=O)O	468.15	4.29404
31.5958	31.927	Train	CC(C)=CC(C)(C)C	378.06	0.331194
30.0219	29.937	Train	CC(C)=CC(C)C	356.45	0.084927
40.5524	40.151	Train	CC(C)=Cc1ccccc1	461.06	0.401444
35.0373	35.973	Train	CC(C)C(=O)C(C)C	397.55	0.935666
38.0617	37.354	Train	CC(C)C(C(C)C)C(C)(C)C	443.15	0.707672
36.9722	36.359	Train	CC(C)C(C(C)C)C(C)C	430.2	0.613153
41.4849	41.693	Train	CC(C)C(C)(C(C)C)C(C)(C)C	477.15	0.208068
39.6326	38.771	Train	CC(C)C(C)(C(C)C)C(C)C	459.15	0.86165
43.7444	44.025	Train	CC(C)C(C)(C(C)C)C(C)O	456	0.28064
29.3726	28.978	Train	CC(C)C(C)(C)C	354.03	0.394581
37.3954	36.359	Train	CC(C)C(C)(C)C(C)(C)C	439.21	1.0364
41.6272	41.884	Train	CC(C)C(C)(C)C(C)(C)C(C)C	479.15	0.25685
35.0219	34.936	Train	CC(C)C(C)(C)C(C)C	414.72	0.0859
41.6165	41.884	Train	CC(C)C(C)(C)C(C)C(C)(C)C	479.15	0.267537
42.3106	42.141	Train	CC(C)C(C)(C)C(C)O	438.15	0.1696
38.5855	37.52	Train	CC(C)C(C)(C)CC(C)(C)C	449.15	1.06549
41.9417	41.478	Train	CC(C)C(C)(C)CO	430.15	0.463742
37.3426	35.869	Train	CC(C)C(C)(C)O	391.75	1.4736
44.6865	44.598	Train	CC(C)C(C)(CO)C(C)(C)C	466	0.088543
41.5339	41.339	Train	CC(C)C(C)(O)C(C)C	430.15	0.194867
46.2202	45.497	Train	CC(C)C(C)(O)CC(C)(C)C	475	0.723245
54.0642	54.17	Train	CC(C)C(C)(O)CO	480	0.105837
27.6961	27.488	Train	CC(C)C(C)C	331.13	0.208121
34.2778	34.21	Train	CC(C)C(C)C(C)(C)C	406.18	0.067763
40.981	41.215	Train	CC(C)C(C)C(C)(C)C(C)(C)C	472.15	0.23399
39.0975	38.328	Train	CC(C)C(C)C(C)(C)C(C)C	454.15	0.76949
41.4863	41.439	Train	CC(C)C(C)C(C)(C)O	431.15	0.047298
36.84	36.861	Train	CC(C)C(C)C(C)C(C)C	429.36	0.021034
40.7769	40.833	Train	CC(C)C(C)C(C)C(C)C(C)C	468.15	0.056137
39.6659	39.878	Train	CC(C)C(C)C(C)CC(C)(C)C	458.15	0.21206
45.2828	44.873	Train	CC(C)C(C)C(C)CO	456.15	0.40983
41.9579	41.531	Train	CC(C)C(C)C(C)O	426.15	0.42687
33.938	34.28	Train	CC(C)C(C)C=O	386.15	0.342035
45.5873	45.23	Train	CC(C)C(C)CC(C)(C)O	466	0.357273
38.5924	38.508	Train	CC(C)C(C)CC(C)C(C)C	448.15	0.084377
37.9355	37.596	Train	CC(C)C(C)CCC(C)(C)C	442.15	0.339543
45.4836	45.2	Train	CC(C)C(C)CCCO	455	0.28355
43.3154	43.18	Train	CC(C)C(C)CCO	438.15	0.135376
42.0547	39.805	Train	CC(C)C(C)CO	422.15	2.24965
38.0339	43.205	Train	CC(C)C(C)O	384.65	5.17106
34.8086	34.794	Train	CC(C)C(C)OC=O	393.32	0.014628
40.4884	40.227	Train	CC(C)C(C)c1ccccc1	461.15	0.261403
39.1475	39.402	Train	CC(C)C(CC(C)(C)C)C(C)C	453.15	0.254478
43.993	44.496	Train	CC(C)C(CCO)C(C)(C)C	456	0.502966
43.8904	43.848	Train	CC(C)C(CO)C(C)C	446.15	0.042373
45.4345	45.199	Train	CC(C)C(O)(C(C)C)C(C)C	467.65	0.235498
39.6459	40.089	Train	CC(C)C(O)C(C)C	411.95	0.443126
42.8068	42.804	Train	CC(C)C(O)CC(C)(C)C	442	0.002816
54.9362	54.294	Train	CC(C)C(O)CO	473.15	0.642234
35.7444	35.755	Train	CC(C)C1(C)CCCC1	421.15	0.010615
70.147	72.477	Train	CC(C)C1=CC2=CC[C@H]3[C@](C)(C(=O)O)CCC[C@]3(C)[C@H]2CC1	649.7	2.32996
27.8862	27.958	Train	CC(C)C1CC1	331.47	0.07177
35.0099	35.038	Train	CC(C)C1CCCC1C	414.15	0.028067
35.6744	35.659	Train	CC(C)C1CCCC1C	421.15	0.015446
36.4806	36.665	Train	CC(C)C1CCCCC1	427.91	0.18438
31.6935	31.736	Train	CC(C)C=CC(C)C	375.15	0.04248
31.6935	31.736	Train	CC(C)C=CC(C)C	375.15	0.04248
39.2244	39.572	Train	CC(C)CC(=O)CC(C)C	441.41	0.34755
44.6626	43.22	Train	CC(C)CC(=O)O	448.25	1.44264
39.1496	39.402	Train	CC(C)CC(C(C)C)C(C)(C)C	453.15	0.252388
38.1922	38.058	Train	CC(C)CC(C(C)C)C(C)C	443.15	0.134192
38.0293	37.038	Train	CC(C)CC(C)(C)C(C)(C)C	443.65	0.99129
36.2966	36.275	Train	CC(C)CC(C)(C)C(C)C	426.26	0.021577
39.7439	39.935	Train	CC(C)CC(C)(C)CC(C)(C)C	458.75	0.19115
37.5352	37.15	Train	CC(C)CC(C)(C)CC(C)C	437.15	0.385164
45.7344	45.674	Train	CC(C)CC(C)(C)CCO	466	0.06036
43.3153	42.892	Train	CC(C)CC(C)(C)CO	441.45	0.423346
38.912	39.067	Train	CC(C)CC(C)(C)O	406.15	0.154982
51.1264	49.349	Train	CC(C)CC(C)(O)C(C)(C)C	513.48	1.77735
29.7493	29.796	Train	CC(C)CC(C)C	353.64	0.04668
35.8244	36.233	Train	CC(C)CC(C)C(C)(C)C	421.56	0.408587
40.6479	40.833	Train	CC(C)CC(C)C(C)(C)C(C)C	468.15	0.185097
34.492	34.811	Train	CC(C)CC(C)C(C)C	404.5	0.31901
39.9537	40.164	Train	CC(C)CC(C)C(C)C(C)(C)C	461.15	0.210272
38.5705	38.418	Train	CC(C)CC(C)C(C)C(C)C	447.15	0.152526
39.9123	40.002	Train	CC(C)CC(C)C(C)CC(C)C	459.45	0.089715
42.4576	42.517	Train	CC(C)CC(C)C(C)O	433.15	0.05936
37.3192	36.989	Train	CC(C)CC(C)CC(C)(C)C	435.35	0.33022
45.4009	45.514	Train	CC(C)CC(C)CC(C)(C)O	466	0.113052
40.2766	40.355	Train	CC(C)CC(C)CC(C)C(C)C	463.15	0.078434
46.4878	46.292	Train	CC(C)CC(C)CC(C)O	467.15	0.195785
39.7339	39.878	Train	CC(C)CC(C)CCC(C)(C)C	458.15	0.144106
45.1556	45.481	Train	CC(C)CC(C)CCCO	455	0.325376
45.5587	45.319	Train	CC(C)CC(C)CCO	456.15	0.239697
43.0248	42.564	Train	CC(C)CC(C)CO	432.15	0.460815
39.8835	54.078	Train	CC(C)CC(C)O	404.85	14.1945
39.5974	39.687	Train	CC(C)CC(CC(C)C)C(C)C	456.15	0.089584
45.5373	45.522	Train	CC(C)CC(CO)C(C)C	460.15	0.015327
47.6282	47.555	Train	CC(C)CC(CO)CC(C)C	477.15	0.073155
41.5086	41.91	Train	CC(C)CC(O)C(C)(C)C	433.15	0.401436
42.2369	42.414	Train	CC(C)CC(O)C(C)C	432.15	0.177054
44.235	44.394	Train	CC(C)CC(O)CC(C)(C)C	455	0.159026
44.5842	45.659	Train	CC(C)CC(O)CC(C)C	451	1.07476
35.9333	36.057	Train	CC(C)CC1CCCC1	421.1	0.123654
32.024	32.502	Train	CC(C)CC=O	365.75	0.478032
40.3707	40.431	Train	CC(C)CCC(C(C)C)C(C)C	463.95	0.060265
33.626	33.581	Train	CC(C)CCC(C)(C)C	397.24	0.044973
40.4341	40.641	Train	CC(C)CCC(C)(C)C(C)(C)C	466.15	0.206918
38.5559	38.131	Train	CC(C)CCC(C)(C)C(C)C	448.15	0.42488
39.6501	39.783	Train	CC(C)CCC(C)(C)CC(C)C	457.15	0.13291
41.2244	41.293	Train	CC(C)CCC(C)(C)O	425.65	0.068646
45.2551	45.208	Train	CC(C)CCC(C)(O)C(C)C	463	0.047104
38.0373	37.685	Train	CC(C)CCC(C)C(C)(C)C	443.15	0.352262
36.8926	37.321	Train	CC(C)CCC(C)C(C)C	429.16	0.4284
40.6976	40.737	Train	CC(C)CCC(C)C(C)C(C)C	467.15	0.039383
39.7296	39.859	Train	CC(C)CCC(C)CC(C)(C)C	457.95	0.12939
48.7309	48.889	Train	CC(C)CCC(C)CCCO	485	0.158077
45.3677	44.905	Train	CC(C)CCC(C)CO	452.15	0.46267
42.0997	41.743	Train	CC(C)CCC(C)O	424.15	0.356712
48.6555	48.543	Train	CC(C)CCC(CO)C(C)C	486.15	0.112533
45.3046	45.208	Train	CC(C)CCC(O)C(C)(C)C	463	0.09661
34.9368	35.445	Train	CC(C)CCC=O	395.15	0.508187
40.8023	40.928	Train	CC(C)CCCC(C)(C)C(C)C	469.15	0.125693
35.1282	35.384	Train	CC(C)CCCC(C)C	408.36	0.255788
39.1785	39.218	Train	CC(C)CCCC(C)C(C)C	452.15	0.039472
48.6468	48.423	Train	CC(C)CCCC(C)C(C)O	485	0.223797
40.4745	40.451	Train	CC(C)CCCC(C)CC(C)C	464.15	0.023457
48.3428	48.905	Train	CC(C)CCCC(C)CCO	485.15	0.56225
44.7506	44.171	Train	CC(C)CCCC(C)O	445.05	0.57964
46.7431	46.568	Train	CC(C)CCCC(O)C(C)C	467.15	0.17508
38.2016	38.021	Train	CC(C)CCCCC(C)(C)C	443.15	0.1806
48.3327	47.908	Train	CC(C)CCCCC(C)(C)O	485	0.424687
37.552	38.242	Train	CC(C)CCCCC(C)C	433.03	0.689952
41.3143	41.31	Train	CC(C)CCCCC(C)C(C)C	473.15	0.004342
45.3796	45.377	Train	CC(C)CCCCC(C)O	454	0.00261
40.6674	40.833	Train	CC(C)CCCCCC(C)(C)C	468.15	0.165592
48.5978	53.278	Train	CC(C)CCCCCCCO	493	4.68024
75.3215	71.205	Train	CC(C)CCCCCCCOC(=O)c1ccccc1C(=O)OCCCCCCCC(C)C	723	4.11651
48.2332	48.469	Train	CC(C)CCCCCCO	479.15	0.23578
73.9859	71.106	Train	CC(C)CCCCCOC(=O)c1ccccc1C(=O)OCCCCCC(C)C	694	2.87989
45.6303	48.066	Train	CC(C)CCCCO	445.15	2.43568
43.097	40.407	Train	CC(C)CCCO	424.95	2.68997
40.6988	45.775	Train	CC(C)CCO	404.35	5.07617
43.5354	43.154	Train	CC(C)CCOC(=O)CC(C)C	467.15	0.381404
35.1582	35.128	Train	CC(C)CCOC=O	397.25	0.030195
41.6541	41.599	Train	CC(C)CCc1ccccc1	472.05	0.055144
48.2548	47.499	Train	CC(C)Cc1ccc(O)cc1	510.15	0.755776
52.1114	52.148	Train	CC(C)Cc1ccc2ccccc2c1	585.41	0.036596
47.8183	47.485	Train	CC(C)Cc1cccc(O)c1	510	0.333268
49.0371	48.965	Train	CC(C)Cc1cccc2ccccc12	552.65	0.07207
39.1022	38.73	Train	CC(C)Cc1ccccc1	445.94	0.372184
47.4402	47.485	Train	CC(C)Cc1ccccc1O	510	0.04479
37.0603	39.87	Train	CC(C)O	355.41	2.80971
32.6034	31.853	Train	CC(C)OC(C)(C)C	378.66	0.750428
29.5255	29.58	Train	CC(C)OC(C)C	341.45	0.054453
30.0809	29.536	Train	CC(C)OC=O	341.25	0.54488
42.6959	42.924	Train	CC(C)c1ccc(C(C)C)cc1	483.65	0.228085
47.2471	46.467	Train	CC(C)c1ccc(O)cc1	502.35	0.780124
47.9685	47.871	Train	CC(C)c1ccc2ccccc2c1	541.35	0.097452
41.9337	41.618	Train	CC(C)c1cccc(C(C)C)c1	476.33	0.31567
46.8152	46.351	Train	CC(C)c1cccc(O)c1	501.15	0.46423
37.1274	38.07	Train	CC(C)c1ccccc1	425.56	0.94261
45.449	45.047	Train	CC(C)c1ccccc1O	487.65	0.401967
48.0731	48.158	Train	CC(C1CCCCC1)C1CCCCC1	544.32	0.08495
37.5162	36.644	Train	CC(CC(C)(C)C)C(C)(C)C	439.15	0.8722
39.5431	39.878	Train	CC(CCC(C)(C)C)C(C)(C)C	458.15	0.334882
47.3573	46.609	Train	CC(CCCO)C(C)(C)C	475.15	0.74834
43.2386	43.151	Train	CC(CCO)C(C)(C)C	444	0.087647
58.7758	58.799	Train	CC(CCO)C(C)(C)O	517.03	0.02315
55.8687	56.831	Train	CC(CCO)CCCO	485.43	0.96227
42.3453	41.78	Train	CC(CO)C(C)(C)C	433.15	0.56533
54.3324	54.17	Train	CC(CO)C(C)(C)O	480	0.16237
57.5667	57.402	Train	CC(CO)C(C)CO	496.94	0.16474
43.7585	43.166	Train	CC(CO)CC(C)(C)C	444.15	0.59253
58.4154	59.008	Train	CC(CO)CC(C)CO	508.21	0.592633
58.4154	59.008	Train	CC(CO)CC(C)CO	508.21	0.59263
58.8553	57.402	Train	CC(CO)CCCO	496.94	1.45333
54.739	53.106	Train	CC(CO)CCO	463.15	1.63303
49.4563	49.368	Train	CC(Cc1ccccc1)c1ccccc1	556.81	0.088284
50.7082	50.663	Train	CC(Cc1ccccc1)c1ccccc1	570.15	0.04523
52.5432	58.158	Train	CC(O)C(=O)O	447	5.61476
43.5387	43.037	Train	CC(O)C(C)(C)C(C)(C)C	453.15	0.501704
44.7202	44.298	Train	CC(O)C(C)(C)CC(C)(C)C	463	0.422238
53.8819	53.649	Train	CC(O)C(C)(C)CO	475.55	0.232905
51.2377	50.067	Train	CC(O)C(C)(C)O	447.15	1.17069
41.6378	41.439	Train	CC(O)C(C)C(C)(C)C	431.15	0.198802
56.0058	64.008	Train	CC(O)C(C)C(C)O	484.65	8.00216
58.9054	59.008	Train	CC(O)C(C)CCCO	508.21	0.102635
55.5978	51.628	Train	CC(O)C(C)CO	473.15	3.96984
54.4568	51.524	Train	CC(O)C(C)O	452	2.93281
54.708	51.742	Train	CC(O)C(C)O	453.85	2.96601
39.6289	39.568	Train	CC(O)CC(C)(C)C	411.15	0.060887
53.2674	61.388	Train	CC(O)CC(C)(C)O	470.65	8.12062
42.378	42.706	Train	CC(O)CC(C)C(C)C	435	0.32802
45.6073	45.514	Train	CC(O)CC(C)CC(C)(C)C	466	0.093323
55.7391	54.413	Train	CC(O)CC(C)O	474.15	1.3261
55.7391	54.413	Train	CC(O)CC(C)O	474.15	1.32608
60.7611	61.135	Train	CC(O)CC(O)C(C)C	530.99	0.37392
43.2978	42.659	Train	CC(O)CCC(C)(C)C	439.15	0.63879
59.4003	58.799	Train	CC(O)CCC(C)(C)O	517.03	0.601337
46.2289	46.086	Train	CC(O)CCC(C)C(C)C	465.15	0.14286
57.7061	57.044	Train	CC(O)CCC(C)O	493.95	0.662078
59.3777	59.008	Train	CC(O)CCCC(C)O	508.21	0.3697
61.4112	58.219	Train	CC(O)CCCCO	510.15	3.19216
59.977	79.397	Train	CC(O)CCCO	497	19.42
59.1876	56.28	Train	CC(O)CCO	487.15	2.90765
30.5006	30.459	Train	CC1(C)C=CCC1	361.15	0.041557
24.497	24.557	Train	CC1(C)CC1	293.78	0.060017
30.5156	30.459	Train	CC1(C)CC=CC1	361.15	0.056612
32.7342	32.728	Train	CC1(C)CCC(C)(C)C1	391.11	0.006154
30.277	35.636	Train	CC1(C)CCCC1	361	5.35897
31.2742	31.357	Train	CC1(C)CCCO1	365.35	0.082836
31.8454	31.97	Train	CC1(C)CCOC1	372.15	0.124621
45.7874	45.951	Train	CC1(O)CCCCC1	430.15	0.16357
42.654	41.637	Train	CC12CCC(CC1=O)C2(C)C	480.57	1.01703
41.6859	41.006	Train	CC12CCCCC1CCCC2	478.15	0.679947
44.7075	45.73	Train	CC1=C(C)C(C)c2ccccc21	509	1.02251
32.0197	31.93	Train	CC1=C(C)CCC1	378.95	0.089665
34.7629	34.721	Train	CC1=C(C)CCCC1	411.13	0.041947
43.9615	42.37	Train	CC1=CC(=O)CC(C)(C)C1	488.35	1.59152
30.7186	30.711	Train	CC1=CC(C)CC1	365.15	0.007647
33.7292	33.757	Train	CC1=CC(C)CCC1	400.25	0.02782
29.6559	30.043	Train	CC1=CC=CC1	345.93	0.387105
39.0954	39.908	Train	CC1=CCC(C(C)C)C=C1	448.15	0.812594
33.8744	33.806	Train	CC1=CCC(C)CC1	401.65	0.068382
36.7458	35.744	Train	CC1=CCC2CC1C2(C)C	429.29	1.00175
29.6841	29.054	Train	CC1=CCCC1	348.95	0.630124
31.6085	31.595	Train	CC1=CCCC1C	375.15	0.01351
34.1182	34.112	Train	CC1=CCCCC1C	404.25	0.006202
40.0835	40.651	Train	CC1=Cc2ccccc2C1	458	0.567527
27.8239	27.761	Train	CC1C(C)C1C	332.85	0.06286
30.6439	30.658	Train	CC1C=CC(C)C1	364.55	0.01406
33.4874	33.216	Train	CC1C=CC(C)CC1	398.15	0.271415
33.3596	33.364	Train	CC1C=CCC(C)C1	395.8	0.004427
29.0931	28.874	Train	CC1C=CCC1	343.16	0.219147
30.7089	30.658	Train	CC1C=CCC1C	364.55	0.050885
30.7089	30.658	Train	CC1C=CCC1C	364.55	0.050887
33.3635	33.364	Train	CC1C=CCCC1C	395.8	0.000456
33.3635	33.364	Train	CC1C=CCCC1C	395.8	0.000456
41.3852	42.059	Train	CC1C=Cc2ccccc21	471.65	0.673822
33.7153	33.696	Train	CC1CC(C)C(C)(C)C1	403.15	0.019332
33.7153	33.696	Train	CC1CC(C)C(C)(C)C1	403.15	0.019343
32.5799	32.616	Train	CC1CC(C)C(C)C1	389.88	0.036094
31.957	31.963	Train	CC1CC(C)C(C)C1	382.44	0.005995
32.6025	32.64	Train	CC1CC(C)C(C)C1	390.15	0.03749
33.455	33.382	Train	CC1CC(C)C(C)C1C	400.55	0.072964
33.7564	33.697	Train	CC1CC(C)C(C)C1C	404.15	0.059355
34.3534	34.31	Train	CC1CC(C)C(C)C1C	411.15	0.04344
35.018	34.924	Train	CC1CC(C)C(C)C1C	418.15	0.093975
34.3534	34.31	Train	CC1CC(C)C(C)C1C	411.15	0.04344
27.9358	27.904	Train	CC1CC(C)C1	333.65	0.03178
27.6846	27.64	Train	CC1CC(C)C1	330.65	0.044595
34.571	33.501	Train	CC1CC(C)CC(C)C1	411.66	1.06998
34.7646	35.016	Train	CC1CC(C)CC(C)C1	413.7	0.251363
23.3529	22.893	Train	CC1CC1	273.88	0.45991
27.053	27.169	Train	CC1CC1(C)C	325.59	0.116037
25.2158	25.173	Train	CC1CC1C	301.36	0.042801
26.0011	25.947	Train	CC1CC1C	310.18	0.054095
29.5929	29.305	Train	CC1CC=CC1	348.31	0.287905
31.9378	31.795	Train	CC1CC=CCC1	375.89	0.142805
33.8455	33.82	Train	CC1CC=CCC1C	400.96	0.025486
33.3787	33.364	Train	CC1CC=CCC1C	395.8	0.014727
35.117	35.126	Train	CC1CCC(C(C)C)C1	415.15	0.00902
35.117	35.126	Train	CC1CCC(C(C)C)C1	415.15	0.009022
31.597	31.666	Train	CC1CCC(C)(C)C1	378.04	0.069004
34.5159	34.398	Train	CC1CCC(C)(C)C1C	411.15	0.117923
33.6668	33.696	Train	CC1CCC(C)(C)C1C	403.15	0.029183
34.3876	34.266	Train	CC1CCC(C)(C)CC1	408.15	0.12162
34.7335	34.722	Train	CC1CCC(C)C(C)C1	414.37	0.011482
35.4051	35.318	Train	CC1CCC(C)C(C)C1	421.15	0.08715
35.4052	35.318	Train	CC1CCC(C)C(C)C1	421.15	0.08716
30.4886	30.755	Train	CC1CCC(C)C1	363.92	0.266364
30.569	31.37	Train	CC1CCC(C)C1	364.88	0.800977
34.4484	34.398	Train	CC1CCC(C)C1(C)C	411.15	0.05037
34.4484	34.398	Train	CC1CCC(C)C1(C)C	411.15	0.050368
33.0875	33.167	Train	CC1CCC(C)C1C	396.15	0.079544
32.0157	32.043	Train	CC1CCC(C)C1C	383.35	0.027253
32.627	32.684	Train	CC1CCC(C)C1C	390.65	0.05702
33.3233	33.14	Train	CC1CCC(C)CC1	397.47	0.183296
32.908	32.477	Train	CC1CCC(C)CC1	392.51	0.430997
31.2744	31.276	Train	CC1CCC(C)O1	365.65	0.001601
47.7265	48.597	Train	CC1CCC(O)CC1	444.15	0.870483
47.7265	48.428	Train	CC1CCC(O)CC1	444.15	0.70149
28.4834	28.563	Train	CC1CCC1C	341.15	0.079613
27.8136	27.86	Train	CC1CCC1C	333.15	0.046394
41.6923	41.275	Train	CC1CCC2CCCCC2C1	481.15	0.41733
42.5307	41.995	Train	CC1CCC2CCCCC2C1	489.15	0.535693
34.5712	34.409	Train	CC1CCCC(C)(C)C1	409.78	0.16223
33.3732	33.247	Train	CC1CCCC(C)C1	397.61	0.126165
34.9872	34.966	Train	CC1CCCC(C)C1C	417.15	0.021152
35.8491	35.758	Train	CC1CCCC(C)C1C	426.15	0.09114
47.3715	47.405	Train	CC1CCCC(O)C1	441.15	0.03354
29.1037	29.337	Train	CC1CCCC1	344.96	0.233317
32.2988	32.444	Train	CC1CCCC1(C)C	386.88	0.145233
31.1993	31.712	Train	CC1CCCC1C	372.68	0.512653
30.558	31.196	Train	CC1CCCC1C	365.02	0.637998
43.1335	43.226	Train	CC1CCCC2(C)CCCCC12	493.15	0.09254
44.4518	43.707	Train	CC1CCCC2CCCCC12	508.15	0.74482
45.1924	44.429	Train	CC1CCCC2CCCCC12	516.15	0.763364
33.7932	33.541	Train	CC1CCCCC1C	402.94	0.25224
46.5597	46.168	Train	CC1CCCCC1O	438.15	0.39168
46.7537	46.596	Train	CC1CCCCC1O	439.65	0.157704
30.4635	30.43	Train	CC1CCCO1	353.37	0.033533
36.0913	35.606	Train	CC1CCOC1	411.15	0.485286
31.6101	31.666	Train	CC1CCOC1C	370	0.055912
43.2379	43.57	Train	CC1CCc2ccccc2C1	493.15	0.33209
26.7939	27.735	Train	CC1CO1	307.05	0.94106
31.7301	31.734	Train	CC1COC(C)C1	370.75	0.003863
32.6636	32.713	Train	CC1COCC1C	381.65	0.04935
37.6737	37.72	Train	CC1OC(C)OC(C)O1	397.25	0.046332
26.1216	26.482	Train	CC=C(C)C	311.71	0.36036
45.0686	41.347	Train	CC=C(C)C(=O)O	458.15	3.72158
32.1746	32.063	Train	CC=C(C)C(C)(C)C	385.15	0.111637
32.1746	32.063	Train	CC=C(C)C(C)(C)C	385.15	0.111637
30.6415	30.66	Train	CC=C(C)C(C)C	364.65	0.018511
30.4531	30.462	Train	CC=C(C)C(C)C	362.4	0.008885
32.9444	33.02	Train	CC=C(C)C(C)CC	389.15	0.075603
28.6562	28.917	Train	CC=C(C)CC	340.85	0.260811
32.6478	32.664	Train	CC=C(C)CC(C)C	385.15	0.01621
32.6478	32.664	Train	CC=C(C)CC(C)C	385.15	0.01622
31.1847	31.261	Train	CC=C(C)CCC	368.33	0.07632
33.8747	33.856	Train	CC=C(C)CCCC	395.15	0.01875
41.1612	40.77	Train	CC=C(C)c1ccccc1	467.85	0.391236
32.9988	33.02	Train	CC=C(CC)C(C)C	389.15	0.021244
32.8374	32.869	Train	CC=C(CC)C(C)C	387.45	0.031605
33.7583	33.766	Train	CC=C(CC)CCC	394.15	0.007722
33.7583	33.766	Train	CC=C(CC)CCC	394.15	0.007722
49.9471	49.886	Train	CC=C(c1ccccc1)c1ccccc1	562.15	0.061144
29.107	28.966	Train	CC=C=C(C)C	345.15	0.140981
23.3129	22.905	Train	CC=CC	274.03	0.407916
23.5068	23.43	Train	CC=CC	276.87	0.076752
47.052	48.878	Train	CC=CC(=O)O	458.15	1.82603
45.3048	48.854	Train	CC=CC(=O)O	445.05	3.54919
29.1295	29.04	Train	CC=CC(C)(C)C	349.89	0.089475
29.4384	29.423	Train	CC=CC(C)(C)C	353.58	0.015412
31.8484	31.778	Train	CC=CC(C)(C)CC	379.15	0.070427
27.873	27.849	Train	CC=CC(C)C	331.75	0.024026
27.6791	30.747	Train	CC=CC(C)C	329.53	3.06786
32.4186	32.446	Train	CC=CC(C)C(C)C	383.15	0.027406
32.4186	32.446	Train	CC=CC(C)C(C)C	383.15	0.0274
30.4244	30.545	Train	CC=CC(C)CC	360.71	0.120607
33.0222	33.096	Train	CC=CC(C)CCC	387.15	0.073848
32.9083	33.007	Train	CC=CC(CC)CC	386.15	0.098724
30.0051	30.677	Train	CC=CC=CC	355.05	0.67194
29.846	29.804	Train	CC=CC=CC	353.15	0.041974
26.0982	26.252	Train	CC=CCC	309.49	0.153848
26.141	26.539	Train	CC=CCC	310.08	0.397961
47.2329	42.439	Train	CC=CCC(=O)O	466.15	4.79392
37.0896	35.42	Train	CC=CCC(=O)O	392.15	1.66959
30.6103	30.718	Train	CC=CCC(C)C	362.65	0.107744
30.4889	30.594	Train	CC=CCC(C)C	361.26	0.105139
33.3403	33.455	Train	CC=CCC(C)CC	391.15	0.11468
33.3403	33.455	Train	CC=CCC(C)CC	391.15	0.114676
28.9151	28.826	Train	CC=CCCC	342.03	0.089089
28.8269	29.097	Train	CC=CCCC	341.02	0.270117
33.3066	33.365	Train	CC=CCCC(C)C	390.15	0.058413
31.6883	31.726	Train	CC=CCCCC	371.1	0.037726
31.7334	31.159	Train	CC=CCCCC	371.56	0.574383
34.3877	33.668	Train	CC=CCCCCC	398.15	0.719733
34.4474	34.45	Train	CC=CCCCCC	398.79	0.00258
47.517	47.368	Train	CC=CCCCCCCCCCCC	536.15	0.148983
41.8585	41.603	Train	CC=Cc1ccc(C)cc1	474.15	0.255482
46.3344	47.73	Train	CC=Cc1ccc(OC)cc1	508.45	1.39559
41.0339	40.815	Train	CC=Cc1cccc(C)c1	465.57	0.21895
38.9235	38.74	Train	CC=Cc1ccccc1	443.16	0.18352
38.9235	38.74	Train	CC=Cc1ccccc1	443.16	0.183515
25.6367	23.991	Train	CC=O	293.55	1.64566
18.8016	18.799	Train	CCC	231.11	0.002554
31.1652	31.004	Train	CCC#CC(C)C	368.35	0.16121
29.967	30.369	Train	CCC#CCC	354.35	0.401959
37.4499	37.245	Train	CCC#CCCCCC	430.25	0.204905
39.5744	39.509	Train	CCC#CCCCCCC	452.45	0.06541
41.5683	41.67	Train	CCC#CCCCCCCC	473.15	0.1017
45.1823	44.956	Train	CCC#CCCCCCCCCC	511.15	0.22626
46.7925	46.595	Train	CCC#CCCCCCCCCCC	528.15	0.1975
48.3061	48.142	Train	CCC#CCCCCCCCCCCC	544.15	0.16413
49.7359	49.595	Train	CCC#CCCCCCCCCCCCC	559.15	0.140924
51.0689	50.955	Train	CCC#CCCCCCCCCCCCCC	573.15	0.11394
52.4003	52.317	Train	CCC#CCCCCCCCCCCCCCC	587.15	0.08326
53.636	53.585	Train	CCC#CCCCCCCCCCCCCCCC	600.15	0.051017
53.929	53.878	Train	CCC#CCCCCCCCCCCCCCCCC	603.15	0.050978
34.5852	34.903	Train	CCC(=O)C(C)(C)C	398.15	0.31781
34.0837	33.843	Train	CCC(=O)C(C)C	386.55	0.240748
36.1985	36.622	Train	CCC(=O)C(C)CC	409.15	0.423514
33.1443	33.571	Train	CCC(=O)CC	375.14	0.426743
36.1593	36.622	Train	CCC(=O)CC(C)C	409.15	0.462744
41.9889	31.22	Train	CCC(=O)O	414.32	10.7689
42.6497	42.794	Train	CCC(=O)OC(=O)CC	442.15	0.1443
34.3565	33.995	Train	CCC(=O)OC(C)C	383.15	0.3615
40.588	42.797	Train	CCC(=O)OC(C)C(C)C	439.78	2.20903
36.4579	40.061	Train	CCC(=O)OC(C)CC	406.15	3.60306
40.5787	42.44	Train	CCC(=O)OC(CC)CC	440.22	1.86132
39.6363	41.622	Train	CCC(=O)OCC(C)(C)C	437.43	1.98573
36.6407	35.597	Train	CCC(=O)OCC(C)C	409.75	1.04366
39.1125	38.443	Train	CCC(=O)OCCC(C)C	432.65	0.669526
39.0338	37.871	Train	CCC(C(C)(C)C)C(C)(C)C	453.15	1.16281
41.1867	41.31	Train	CCC(C(C)(C)C)C(C)(C)CC	473.15	0.123286
40.2061	40.355	Train	CCC(C(C)C(C)C)C(C)(C)C	463.15	0.14887
41.8451	41.884	Train	CCC(C(C)C)(C(C)C)C(C)C	479.15	0.038907
40.8893	41.024	Train	CCC(C(C)C)C(C)(C)C(C)C	470.15	0.134714
38.9268	38.399	Train	CCC(C(C)C)C(C)(C)CC	451.15	0.527846
41.2846	41.31	Train	CCC(C(C)C)C(C)(CC)CC	473.15	0.025416
35.0332	34.733	Train	CCC(C(C)C)C(C)C	409.87	0.300195
40.2856	40.451	Train	CCC(C(C)C)C(C)C(C)(C)C	464.15	0.165405
38.9003	38.688	Train	CCC(C(C)C)C(C)C(C)C	450.15	0.212253
40.4245	40.451	Train	CCC(C(C)C)C(C)CC(C)C	464.15	0.026542
42.971	42.926	Train	CCC(C(C)C)C(C)O	437.15	0.04503
40.3258	40.355	Train	CCC(C(C)C)C(CC)C(C)C	463.15	0.02921
54.3384	55.141	Train	CCC(C(C)O)C(C)O	480.65	0.80263
42.5548	42.651	Train	CCC(C)(C(C)(C)C)C(C)(C)C	487.15	0.096194
39.5816	38.398	Train	CCC(C)(C(C)C)C(C)(C)C	459.15	1.1836
37.8594	37.028	Train	CCC(C)(C(C)C)C(C)C	442.6	0.83143
41.2789	41.406	Train	CCC(C)(C(C)C)C(C)C(C)C	474.15	0.127054
40.4159	40.546	Train	CCC(C)(C)C(C(C)C)C(C)C	465.15	0.130053
34.7116	34.476	Train	CCC(C)(C)C(C)(C)C	413.44	0.235647
39.6596	38.486	Train	CCC(C)(C)C(C)(C)C(C)C	460.15	1.17359
37.8985	35.02	Train	CCC(C)(C)C(C)(C)CC	443.16	2.87846
40.7596	40.928	Train	CCC(C)(C)C(C)(C)CC(C)C	469.15	0.168433
41.2873	41.188	Train	CCC(C)(C)C(C)(C)O	433.15	0.099277
41.9036	42.076	Train	CCC(C)(C)C(C)(CC)C(C)C	481.15	0.172382
40.0651	39.088	Train	CCC(C)(C)C(C)(CC)CC	463.15	0.977132
35.2145	35.417	Train	CCC(C)(C)C(C)=O	403.75	0.20251
32.5144	32.398	Train	CCC(C)(C)C(C)C	387.92	0.11638
39.5568	38.398	Train	CCC(C)(C)C(C)C(C)(C)C	459.15	1.15876
44.288	44.313	Train	CCC(C)(C)C(C)C(C)(C)O	463.15	0.024994
37.0851	36.652	Train	CCC(C)(C)C(C)C(C)C	434.76	0.43312
39.6693	39.973	Train	CCC(C)(C)C(C)CC(C)(C)C	459.15	0.303746
38.6801	38.22	Train	CCC(C)(C)C(C)CC(C)C	449.15	0.460145
40.8164	40.928	Train	CCC(C)(C)C(C)CCC(C)C	469.15	0.111563
43.8359	43.657	Train	CCC(C)(C)C(C)CO	449	0.178915
40.7725	40.472	Train	CCC(C)(C)C(C)O	420.15	0.300453
42.2823	42.268	Train	CCC(C)(C)C(CC)(CC)CC	483.15	0.01434
44.331	44.313	Train	CCC(C)(C)C(O)C(C)(C)C	463.15	0.01796
42.8834	43.021	Train	CCC(C)(C)C(O)C(C)C	444.15	0.137585
44.0473	44.394	Train	CCC(C)(C)C(O)CC(C)C	455	0.34668
36.2849	35.062	Train	CCC(C)(C)CC(C)(C)C	426.96	1.22289
39.0697	38.203	Train	CCC(C)(C)CC(C)(C)CC	453.15	0.866687
45.3336	44.744	Train	CCC(C)(C)CC(C)(C)O	466	0.589595
41.4139	41.502	Train	CCC(C)(C)CC(C)(CC)CC	475.15	0.08813
34.2343	34.309	Train	CCC(C)(C)CC(C)C	403.81	0.074663
39.7514	40.069	Train	CCC(C)(C)CC(C)C(C)(C)C	460.15	0.317627
38.2549	37.863	Train	CCC(C)(C)CC(C)C(C)C	445.15	0.391925
39.9383	40.069	Train	CCC(C)(C)CC(C)CC(C)C	460.15	0.13067
42.324	42.239	Train	CCC(C)(C)CC(C)O	435	0.084982
37.5869	36.965	Train	CCC(C)(C)CCC(C)(C)C	439.15	0.62189
40.0941	40.326	Train	CCC(C)(C)CCC(C)(C)CC	462.85	0.23188
36.4219	36.777	Train	CCC(C)(C)CCC(C)C	425.96	0.355133
40.4714	40.641	Train	CCC(C)(C)CCC(C)C(C)C	466.15	0.16965
39.6106	39.878	Train	CCC(C)(C)CCCC(C)(C)C	458.15	0.26742
38.7538	38.561	Train	CCC(C)(C)CCCC(C)C	449.15	0.192807
40.9587	41.024	Train	CCC(C)(C)CCCCC(C)C	470.15	0.065298
40.3786	37.935	Train	CCC(C)(C)CO	409.95	2.44362
36.3063	37.752	Train	CCC(C)(C)O	375.15	1.44566
30.7497	30.611	Train	CCC(C)(C)OC	359.45	0.138748
30.7497	30.611	Train	CCC(C)(C)OC	359.45	0.138744
51.0882	52.507	Train	CCC(C)(C)c1ccc(O)cc1	535.15	1.41877
40.7704	40.225	Train	CCC(C)(C)c1ccccc1	465.53	0.545393
40.8474	41.024	Train	CCC(C)(CC(C)(C)C)C(C)C	470.15	0.176588
40.5601	40.737	Train	CCC(C)(CC(C)C)C(C)(C)C	467.15	0.176888
38.686	38.22	Train	CCC(C)(CC(C)C)C(C)C	449.15	0.466043
39.7626	39.878	Train	CCC(C)(CC(C)C)CC(C)C	458.15	0.11542
37.858	36.484	Train	CCC(C)(CC)C(C)(C)C	442.66	1.37396
44.5233	44.243	Train	CCC(C)(CC)C(C)(C)O	461	0.280342
42.211	42.268	Train	CCC(C)(CC)C(C)(CC)CC	483.15	0.056994
35.4761	35.313	Train	CCC(C)(CC)C(C)C	417.86	0.16311
41.8883	42.076	Train	CCC(C)(CC)C(C)C(C)(C)C	481.15	0.187656
39.0711	38.577	Train	CCC(C)(CC)C(C)C(C)C	453.15	0.49413
41.9923	42.036	Train	CCC(C)(CC)C(C)O	433	0.043675
33.0537	32.807	Train	CCC(C)(CC)CC	391.42	0.24671
37.22	37.07	Train	CCC(C)(CC)CC(C)C	434.26	0.14997
40.0301	40.26	Train	CCC(C)(CC)CCC(C)(C)C	462.15	0.229856
38.943	38.741	Train	CCC(C)(CC)CCC(C)C	451.15	0.20195
41.0686	41.119	Train	CCC(C)(CC)CCCC(C)C	471.15	0.050362
43.9389	43.988	Train	CCC(C)(CC)CCO	448	0.04906
42.4269	41.891	Train	CCC(C)(CC)CO	430.15	0.535903
40.8077	40.928	Train	CCC(C)(CCC(C)C)C(C)C	469.15	0.120265
45.4465	45.178	Train	CCC(C)(CO)CC(C)C	461.15	0.268514
57.1564	56.977	Train	CCC(C)(CO)CO	498.95	0.17941
40.4329	40.395	Train	CCC(C)(O)C(C)(C)C	425.15	0.03787
45.8555	45.512	Train	CCC(C)(O)C(C)(C)C(C)C	475.15	0.343484
60.4892	58.56	Train	CCC(C)(O)C(C)(C)O	525.85	1.92916
39.8646	39.769	Train	CCC(C)(O)C(C)C	413.15	0.095567
45.1352	44.813	Train	CCC(C)(O)C(C)C(C)(C)C	468.15	0.32225
58.7695	58.799	Train	CCC(C)(O)C(C)CO	517.03	0.029495
38.404	37.065	Train	CCC(C)(O)CC	395.56	1.33903
42.0431	42.042	Train	CCC(C)(O)CC(C)(C)C	439	0.00109
41.1794	41.242	Train	CCC(C)(O)CC(C)C	425.15	0.062602
58.9861	58.799	Train	CCC(C)(O)CC(C)O	517.03	0.187103
43.6496	44.45	Train	CCC(C)(O)CCC(C)C	446.15	0.800445
46.4886	46.278	Train	CCC(C)(O)CCCC(C)C	469.15	0.210575
54.9021	55.088	Train	CCC(C)(O)CCO	482.98	0.185908
53.1462	52.361	Train	CCC(C)(O)CO	462.15	0.785248
31.2671	31.219	Train	CCC(C)=C(C)C	370.55	0.04812
33.5732	33.596	Train	CCC(C)=C(C)CC	395.15	0.0228
33.5732	33.596	Train	CCC(C)=C(C)CC	395.15	0.022804
32.2524	32.273	Train	CCC(C)=CC(C)C	380.75	0.02056
32.3854	32.397	Train	CCC(C)=CC(C)C	382.15	0.011635
25.4418	24.793	Train	CCC(C)C	300.99	0.648786
45.2619	46.581	Train	CCC(C)C(=O)O	450.15	1.31914
40.121	40.26	Train	CCC(C)C(C(C)C)C(C)(C)C	462.15	0.13896
38.7197	38.508	Train	CCC(C)C(C(C)C)C(C)C	448.15	0.211677
40.7686	40.737	Train	CCC(C)C(C(C)C)C(C)CC	467.15	0.031646
41.6155	41.693	Train	CCC(C)C(C)(C(C)C)C(C)C	477.15	0.077476
32.0697	32.157	Train	CCC(C)C(C)(C)C	383	0.08728
39.3927	38.222	Train	CCC(C)C(C)(C)C(C)(C)C	457.15	1.17072
41.7202	41.884	Train	CCC(C)C(C)(C)C(C)(C)CC	479.15	0.163778
37.3617	36.987	Train	CCC(C)C(C)(C)C(C)C	437.75	0.37471
41.1848	41.31	Train	CCC(C)C(C)(C)C(C)C(C)C	473.15	0.12524
39.6041	39.024	Train	CCC(C)C(C)(C)C(C)CC	458.15	0.580126
41.5014	41.502	Train	CCC(C)C(C)(C)C(CC)CC	475.15	0.000642
35.0868	35.146	Train	CCC(C)C(C)(C)CC	413.62	0.05917
40.7755	40.928	Train	CCC(C)C(C)(C)CC(C)(C)C	469.15	0.152518
40.6327	40.737	Train	CCC(C)C(C)(C)CCC(C)C	467.15	0.104325
43.8177	43.521	Train	CCC(C)C(C)(C)CO	447.65	0.29668
39.6562	39.669	Train	CCC(C)C(C)(C)O	412.15	0.012758
41.5517	41.693	Train	CCC(C)C(C)(CC)C(C)(C)C	477.15	0.141265
39.8039	39.203	Train	CCC(C)C(C)(CC)C(C)C	460.15	0.600925
41.7838	41.789	Train	CCC(C)C(C)(CC)C(C)CC	478.15	0.005175
37.2404	36.987	Train	CCC(C)C(C)(CC)CC	435.26	0.253356
40.7669	40.833	Train	CCC(C)C(C)(CC)CC(C)C	468.15	0.066116
44.8637	44.513	Train	CCC(C)C(C)(O)C(C)(C)C	465.15	0.35067
42.3551	42.501	Train	CCC(C)C(C)(O)C(C)C	439	0.145928
41.0766	41.242	Train	CCC(C)C(C)(O)CC	425.15	0.165393
44.1629	44.394	Train	CCC(C)C(C)(O)CC(C)C	455	0.2311
34.5788	33.939	Train	CCC(C)C(C)=O	390.55	0.63978
30.4999	30.492	Train	CCC(C)C(C)C	362.93	0.007887
36.8155	36.401	Train	CCC(C)C(C)C(C)(C)C	431.96	0.414502
41.1681	41.31	Train	CCC(C)C(C)C(C)(C)C(C)C	473.15	0.14188
39.1963	38.667	Train	CCC(C)C(C)C(C)(C)CC	454.15	0.529335
45.6696	45.23	Train	CCC(C)C(C)C(C)(C)O	466	0.43964
41.4529	41.502	Train	CCC(C)C(C)C(C)(CC)CC	475.15	0.049108
35.2354	35.69	Train	CCC(C)C(C)C(C)C	412.2	0.45463
40.5904	40.737	Train	CCC(C)C(C)C(C)C(C)(C)C	467.15	0.14663
41.2567	41.215	Train	CCC(C)C(C)C(C)C(C)CC	472.15	0.041668
37.5103	37.447	Train	CCC(C)C(C)C(C)CC	435.66	0.06332
40.9492	40.928	Train	CCC(C)C(C)C(CC)C(C)C	469.15	0.021184
39.5223	39.491	Train	CCC(C)C(C)C(CC)CC	455.15	0.031346
37.986	37.596	Train	CCC(C)C(C)CC(C)(C)C	442.15	0.389977
40.5253	40.641	Train	CCC(C)C(C)CC(C)(C)CC	466.15	0.115655
36.9305	37.112	Train	CCC(C)C(C)CC(C)C	429.66	0.181477
40.7549	40.833	Train	CCC(C)C(C)CC(C)C(C)C	468.15	0.07813
40.2055	40.355	Train	CCC(C)C(C)CCC(C)(C)C	463.15	0.14948
39.0278	39.127	Train	CCC(C)C(C)CCC(C)C	451.15	0.09916
41.2634	41.215	Train	CCC(C)C(C)CCCC(C)C	472.15	0.048405
45.0571	45.097	Train	CCC(C)C(C)CCO	454	0.03988
43.539	43.077	Train	CCC(C)C(C)CO	437.15	0.462024
41.2831	41.31	Train	CCC(C)C(CC)(CC)C(C)C	473.15	0.026866
40.2256	39.822	Train	CCC(C)C(CC)(CC)CC	463.15	0.403605
38.6354	38.131	Train	CCC(C)C(CC)C(C)(C)C	448.15	0.504445
40.9838	41.024	Train	CCC(C)C(CC)C(C)(C)CC	470.15	0.040167
40.9525	40.928	Train	CCC(C)C(CC)C(C)C(C)C	469.15	0.024457
39.3927	39.4	Train	CCC(C)C(CC)C(C)CC	454.15	0.007346
41.3035	41.119	Train	CCC(C)C(CC)C(CC)CC	471.15	0.184497
35.5217	36.401	Train	CCC(C)C(CC)CC	413.56	0.879317
39.869	39.973	Train	CCC(C)C(CC)CC(C)(C)C	459.15	0.104012
38.7858	38.854	Train	CCC(C)C(CC)CC(C)C	448.15	0.068188
44.8962	44.683	Train	CCC(C)C(CC)CO	450	0.21322
57.4119	59.008	Train	CCC(C)C(CO)CO	508.21	1.59606
44.2156	44.244	Train	CCC(C)C(O)(CC)CC	452	0.028393
42.7248	42.819	Train	CCC(C)C(O)C(C)(C)C	442.15	0.09423
42.2291	42.517	Train	CCC(C)C(O)C(C)C	433.15	0.287927
45.6823	45.569	Train	CCC(C)C(O)C(C)CC	460.15	0.113343
41.7011	41.538	Train	CCC(C)C(O)CC	422.15	0.163145
44.234	44.394	Train	CCC(C)C(O)CC(C)(C)C	455	0.160037
36.5236	36.631	Train	CCC(C)C1CCCC1	427.5	0.107387
32.5101	32.54	Train	CCC(C)C=C(C)C	383.75	0.02987
40.2923	40.355	Train	CCC(C)CC(C(C)C)C(C)C	463.15	0.062733
33.8445	34.016	Train	CCC(C)CC(C)(C)C	399.69	0.171483
40.5547	40.737	Train	CCC(C)CC(C)(C)C(C)(C)C	467.15	0.182316
38.6862	38.22	Train	CCC(C)CC(C)(C)C(C)C	449.15	0.46624
40.7623	40.833	Train	CCC(C)CC(C)(C)C(C)CC	468.15	0.070694
36.6842	36.652	Train	CCC(C)CC(C)(C)CC	428.85	0.032204
40.882	41.11	Train	CCC(C)CC(C)(C)O	423.85	0.228027
40.9894	41.071	Train	CCC(C)CC(C)(CC)C(C)C	470.65	0.081628
39.1775	38.921	Train	CCC(C)CC(C)(CC)CC	453.15	0.25655
44.0459	44.04	Train	CCC(C)CC(C)(O)CC	450	0.005883
41.1255	41.024	Train	CCC(C)CC(C)C(CC)CC	470.15	0.10155
35.1044	35.648	Train	CCC(C)CC(C)CC	409.16	0.543584
39.7502	39.878	Train	CCC(C)CC(C)CC(C)(C)C	458.15	0.127813
38.6835	38.764	Train	CCC(C)CC(C)CC(C)C	447.15	0.080513
40.898	40.833	Train	CCC(C)CC(C)CC(C)CC	468.15	0.065014
40.7924	40.737	Train	CCC(C)CC(C)CCC(C)C	467.15	0.055408
48.7469	48.889	Train	CCC(C)CC(C)CCCO	485	0.142086
44.6651	44.491	Train	CCC(C)CC(C)CO	448.15	0.17405
41.9096	41.743	Train	CCC(C)CC(C)O	424.15	0.166634
41.2163	41.215	Train	CCC(C)CC(CC)(CC)CC	472.15	0.001297
40.256	40.355	Train	CCC(C)CC(CC)C(C)(C)C	463.15	0.09904
41.0151	40.928	Train	CCC(C)CC(CC)C(C)CC	469.15	0.087144
37.2903	37.698	Train	CCC(C)CC(CC)CC	431.36	0.40769
40.3979	40.355	Train	CCC(C)CC(CC)CC(C)C	463.15	0.042892
46.9911	46.851	Train	CCC(C)CC(CC)CO	468.15	0.14012
46.9594	47.243	Train	CCC(C)CC(CO)C(C)C	474.15	0.28356
45.7874	45.954	Train	CCC(C)CC(O)(CC)CC	466	0.166605
41.7405	42.28	Train	CCC(C)CC(O)CC	426.75	0.53949
46.4721	45.75	Train	CCC(C)CC(O)CC(C)C	468.15	0.72215
34.8386	35.445	Train	CCC(C)CC=O	395.15	0.606446
40.8054	40.928	Train	CCC(C)CCC(C)(C)C(C)C	469.15	0.122637
38.8591	38.651	Train	CCC(C)CCC(C)(C)CC	450.15	0.208116
44.6639	44.55	Train	CCC(C)CCC(C)(C)O	455	0.11393
41.1836	41.215	Train	CCC(C)CCC(C)(CC)CC	472.15	0.031353
35.127	35.606	Train	CCC(C)CCC(C)C	409.16	0.47896
40.6031	40.737	Train	CCC(C)CCC(C)C(C)(C)C	467.15	0.13389
39.2158	39.309	Train	CCC(C)CCC(C)C(C)C	453.15	0.093218
41.3693	41.31	Train	CCC(C)CCC(C)C(C)CC	473.15	0.05926
37.5198	38.074	Train	CCC(C)CCC(C)CC	433.96	0.55422
40.7919	40.737	Train	CCC(C)CCC(C)CC(C)C	467.15	0.054862
44.4696	44.171	Train	CCC(C)CCC(C)O	445.05	0.298612
41.094	41.024	Train	CCC(C)CCC(CC)C(C)C	470.15	0.070025
39.6002	39.848	Train	CCC(C)CCC(CC)CC	455.15	0.247754
46.0082	45.898	Train	CCC(C)CCC(O)CC	459	0.110244
40.7694	40.833	Train	CCC(C)CCCC(C)(C)CC	468.15	0.063644
37.5463	38.2	Train	CCC(C)CCCC(C)C	433.54	0.653743
41.4413	41.406	Train	CCC(C)CCCC(C)C(C)C	474.15	0.03527
39.8077	40.031	Train	CCC(C)CCCC(C)CC	457.15	0.22328
48.4543	48.679	Train	CCC(C)CCCC(C)CO	483	0.22472
41.4259	41.31	Train	CCC(C)CCCC(CC)CC	473.15	0.115926
40.7713	40.833	Train	CCC(C)CCCCC(C)(C)C	468.15	0.06166
39.4713	39.664	Train	CCC(C)CCCCC(C)C	453.15	0.19274
49.2133	49.099	Train	CCC(C)CCCCC(C)O	487	0.114284
41.7633	41.693	Train	CCC(C)CCCCCC(C)C	477.15	0.07026
48.6196	49.568	Train	CCC(C)CCCCCCO	487	0.94838
46.9153	46.147	Train	CCC(C)CCCCO	459.75	0.76829
45.3783	44.444	Train	CCC(C)CCCO	446.15	0.934304
42.8408	40.575	Train	CCC(C)CCO	425.55	2.26584
40.7725	44.747	Train	CCC(C)CO	401.85	3.97454
31.4917	31.413	Train	CCC(C)COC	363.15	0.078718
37.0922	36.88	Train	CCC(C)COC(C)=O	413.15	0.212163
41.4683	41.424	Train	CCC(C)Cc1ccccc1	470.15	0.04427
38.0865	42.703	Train	CCC(C)O	372.7	4.61646
34.4662	34.297	Train	CCC(C)OC(C)CC	394.2	0.16918
32.08	31.35	Train	CCC(C)OC=O	363.55	0.730048
41.3711	41.362	Train	CCC(C)c1ccc(C)cc1	470.15	0.009147
48.8129	47.995	Train	CCC(C)c1ccc(O)cc1	515.25	0.81788
41.0468	41.086	Train	CCC(C)c1cccc(C)c1	467.15	0.039224
47.7104	47.485	Train	CCC(C)c1cccc(O)c1	510	0.225396
51.1111	53.306	Train	CCC(C)c1cccc2ccccc12	575	2.19494
46.5592	46.624	Train	CCC(C)c1ccccc1O	501.15	0.06482
49.2938	49.359	Train	CCC(C1CCCCC1)C1CCCCC1	556.71	0.065226
34.5249	34.957	Train	CCC(C=O)CC	389.95	0.43213
37.7096	37.328	Train	CCC(CC(C)(C)C)C(C)C	439.15	0.381637
40.244	40.355	Train	CCC(CC(C)(C)CC)C(C)C	463.15	0.11104
40.5809	40.641	Train	CCC(CC(C)C(C)C)C(C)C	466.15	0.060083
38.1211	37.685	Train	CCC(CC(C)C)C(C)(C)C	443.15	0.43607
40.4672	40.546	Train	CCC(CC(C)C)C(C)(C)CC	465.15	0.078825
36.7519	36.819	Train	CCC(CC(C)C)C(C)C	427.26	0.067108
39.2519	39.402	Train	CCC(CC(C)C)CC(C)(C)C	453.15	0.150093
38.3494	38.4	Train	CCC(CC(C)C)CC(C)C	443.15	0.050627
41.7797	41.884	Train	CCC(CC)(C(C)C)C(C)(C)C	479.15	0.10433
40.0497	39.381	Train	CCC(CC)(C(C)C)C(C)C	462.15	0.668675
40.2344	40.355	Train	CCC(CC)(CC(C)C)C(C)C	463.15	0.120564
40.0028	38.999	Train	CCC(CC)(CC)C(C)(C)C	462.15	1.0038
41.687	41.693	Train	CCC(CC)(CC)C(C)C(C)C	477.15	0.00604
35.8551	35.282	Train	CCC(CC)(CC)CC	419.34	0.573087
41.0965	41.119	Train	CCC(CC)(CC)CCC(C)C	471.15	0.02251
44.0581	43.784	Train	CCC(CC)(CC)CO	446	0.27406
57.3189	58.22	Train	CCC(CC)(CO)CO	507.15	0.901137
33.1385	33.15	Train	CCC(CC)=C(C)C	390.15	0.011496
47.1076	48.277	Train	CCC(CC)C(=O)O	466.95	1.16938
40.377	40.355	Train	CCC(CC)C(C(C)C)C(C)C	463.15	0.022045
34.5203	34.369	Train	CCC(CC)C(C)(C)C	406.99	0.151332
41.3024	41.406	Train	CCC(CC)C(C)(C)C(C)(C)C	474.15	0.1036
37.3592	37.112	Train	CCC(CC)C(C)(C)CC	436.06	0.24723
41.9488	41.829	Train	CCC(CC)C(C)(C)O	430.95	0.11979
41.7026	41.693	Train	CCC(CC)C(C)(CC)C(C)C	477.15	0.00961
44.3693	44.244	Train	CCC(CC)C(C)(O)CC	452	0.125293
36.5528	36.809	Train	CCC(CC)C(C)=O	411.15	0.25618
33.1235	32.966	Train	CCC(CC)C(C)C	388.81	0.15748
38.7396	38.22	Train	CCC(CC)C(C)C(C)(C)C	449.15	0.519647
41.1951	41.215	Train	CCC(CC)C(C)C(C)(C)CC	472.15	0.01987
41.0859	41.024	Train	CCC(CC)C(C)C(C)C(C)C	470.15	0.061876
41.6206	41.31	Train	CCC(CC)C(C)C(CC)CC	473.15	0.310567
39.9807	40.069	Train	CCC(CC)C(C)CC(C)(C)C	460.15	0.08828
38.8951	38.945	Train	CCC(CC)C(C)CC(C)C	449.15	0.049862
41.1215	41.024	Train	CCC(CC)C(C)CCC(C)C	470.15	0.097483
44.702	44.476	Train	CCC(CC)C(C)CO	448	0.225965
42.3329	41.845	Train	CCC(CC)C(C)O	425.15	0.48785
42.0911	41.884	Train	CCC(CC)C(CC)(CC)CC	479.15	0.207114
40.304	40.355	Train	CCC(CC)C(CC)C(C)(C)C	463.15	0.051014
39.2231	39.218	Train	CCC(CC)C(CC)C(C)C	452.15	0.005137
37.8421	37.656	Train	CCC(CC)C(CC)CC	437.06	0.186087
40.7635	40.641	Train	CCC(CC)C(CC)CC(C)C	466.15	0.122496
44.8546	44.918	Train	CCC(CC)C(O)C(C)(C)C	460.15	0.06337
44.5987	44.729	Train	CCC(CC)C(O)C(C)C	452	0.13026
31.0963	31.007	Train	CCC(CC)CC	366.62	0.089294
35.9003	36.233	Train	CCC(CC)CC(C)(C)C	420.16	0.33273
40.6385	40.737	Train	CCC(CC)CC(C)(C)C(C)C	467.15	0.09854
38.6918	38.471	Train	CCC(CC)CC(C)(C)CC	448.15	0.220837
41.0141	41.024	Train	CCC(CC)CC(C)(CC)CC	470.15	0.00986
40.4204	40.546	Train	CCC(CC)CC(C)C(C)(C)C	465.15	0.125613
39.05	39.127	Train	CCC(CC)CC(C)C(C)C	451.15	0.077043
41.185	41.119	Train	CCC(CC)CC(C)C(C)CC	471.15	0.065967
40.6023	40.546	Train	CCC(CC)CC(C)CC(C)C	465.15	0.056287
43.8427	43.752	Train	CCC(CC)CC(C)O	441	0.090667
39.3276	39.573	Train	CCC(CC)CC(CC)CC	452.15	0.24544
38.3866	38.201	Train	CCC(CC)CCC(C)(C)C	445.15	0.185597
40.9057	40.928	Train	CCC(CC)CCC(C)(C)CC	469.15	0.022322
41.2578	41.215	Train	CCC(CC)CCC(C)C(C)C	472.15	0.042774
41.6817	41.502	Train	CCC(CC)CCC(CC)CC	475.15	0.179744
40.5921	40.641	Train	CCC(CC)CCCC(C)(C)C	466.15	0.048887
39.649	39.848	Train	CCC(CC)CCCC(C)C	455.15	0.198983
41.5813	41.502	Train	CCC(CC)CCCCC(C)C	475.15	0.079326
47.9632	47.716	Train	CCC(CC)CCCCO	472	0.247158
45.7975	45.442	Train	CCC(CC)CCCO	453	0.355455
44.2253	43.718	Train	CCC(CC)CCO	439.15	0.50726
42.3291	43.205	Train	CCC(CC)CO	419.65	0.8759
36.3854	36.193	Train	CCC(CC)OC(C)=O	405.15	0.19236
34.8886	34.513	Train	CCC(CC)OC=O	393.76	0.37561
40.935	40.87	Train	CCC(CC)c1ccccc1	464.15	0.065047
39.9314	40.069	Train	CCC(CCC(C)(C)C)C(C)C	460.15	0.137558
40.3972	40.355	Train	CCC(CCC(C)C)CC(C)C	463.15	0.042156
40.9834	40.928	Train	CCC(CCCC(C)C)C(C)C	469.15	0.055414
44.4245	44.476	Train	CCC(CCO)C(C)C	448	0.05154
43.712	43.353	Train	CCC(CO)C(C)(C)C	446	0.35902
43.2975	42.872	Train	CCC(CO)C(C)C	435.15	0.42547
58.1097	59.008	Train	CCC(CO)C(C)CO	508.21	0.89829
55.2831	55.376	Train	CCC(CO)C(C)O	480	0.09288
45.0112	44.646	Train	CCC(CO)CC(C)C	449.65	0.365177
48.6842	48.011	Train	CCC(CO)CCC(C)(C)C	486	0.673216
46.8689	46.627	Train	CCC(CO)CCC(C)C	466	0.241862
56.2406	56.831	Train	CCC(CO)CCCO	485.43	0.590354
55.9355	54.456	Train	CCC(CO)CO	475.2	1.47951
43.8291	43.718	Train	CCC(O)(C(C)C)C(C)C	451.05	0.11114
43.8422	43.685	Train	CCC(O)(C(C)C)C(C)C	451.15	0.1572
42.9659	42.857	Train	CCC(O)(CC)C(C)(C)C	447.15	0.108946
42.1155	42.052	Train	CCC(O)(CC)C(C)C	433.15	0.063456
40.4369	40.42	Train	CCC(O)(CC)CC	415.65	0.016924
44.4787	44.424	Train	CCC(O)(CC)CC(C)(C)C	460	0.05467
43.4019	43.545	Train	CCC(O)(CC)CC(C)C	445.15	0.143137
53.4962	53.926	Train	CCC(O)(CC)CO	473.15	0.429803
39.289	39.368	Train	CCC(O)C(C)(C)C	409.15	0.079037
41.9644	41.95	Train	CCC(O)C(C)(C)CC	432.15	0.014447
54.2959	55.104	Train	CCC(O)C(C)(C)CO	485.65	0.808086
58.6133	57.187	Train	CCC(O)C(C)(C)O	505.76	1.42632
59.1857	58.799	Train	CCC(O)C(C)(O)CC	517.03	0.386684
39.1548	37.442	Train	CCC(O)C(C)C	399.66	1.71276
41.7567	42.092	Train	CCC(O)C(C)C(C)C	429	0.33532
61.2244	61.135	Train	CCC(O)C(C)C(C)O	530.99	0.089358
46.2512	46.449	Train	CCC(O)C(C)C(CC)CC	466	0.197795
57.0221	56.985	Train	CCC(O)C(C)CO	493.45	0.037125
43.3814	43.354	Train	CCC(O)C(CC)CC	437.15	0.027435
38.9843	30.041	Train	CCC(O)CC	388.45	8.94332
41.5438	41.435	Train	CCC(O)CC(C)C	421.15	0.10883
47.3846	47.525	Train	CCC(O)CCC(CC)CC	472	0.140444
46.2965	45.898	Train	CCC(O)CCCC(C)C	459	0.398535
58.5078	57.394	Train	CCC(O)CCO	494.15	1.11383
55.738	53.53	Train	CCC(O)CO	464.15	2.20804
27.6563	27.819	Train	CCC1(C)CC1	329.92	0.162658
34.5372	34.604	Train	CCC1(C)CCC(C)C1	409.15	0.066822
34.5372	34.604	Train	CCC1(C)CCC(C)C1	409.15	0.06683
33.3178	33.225	Train	CCC1(C)CCCC1	394.67	0.092833
35.2714	35.314	Train	CCC1(C)CCCC1C	417.15	0.04262
35.2714	35.314	Train	CCC1(C)CCCC1C	417.15	0.042615
36.2428	36.18	Train	CCC1(C)CCCCC1	425.31	0.062764
36.2319	36.297	Train	CCC1(CC)CCCC1	423.65	0.06507
44.5865	44.475	Train	CCC12CCCCC1CCCC2	506.15	0.111452
43.7481	43.706	Train	CCC12CCCCC1CCCC2	498.15	0.042062
32.3447	32.343	Train	CCC1=CCCC1	379.48	0.00171
35.0663	35.026	Train	CCC1=CCCCC1	410.14	0.04033
35.1864	35.222	Train	CCC1C(C)CCC1C	417.15	0.035644
35.9751	35.931	Train	CCC1C(C)CCC1C	425.15	0.04413
34.5218	34.602	Train	CCC1C(C)CCC1C	410.15	0.080184
31.5798	31.579	Train	CCC1C=CCC1	370.92	0.0008
34.6393	34.544	Train	CCC1C=CCCC1	404.76	0.09528
35.4994	35.488	Train	CCC1CC(C)C(C)C1	420.15	0.011374
34.8349	34.868	Train	CCC1CC(C)C(C)C1	413.15	0.03314
35.4994	35.488	Train	CCC1CC(C)C(C)C1	420.15	0.011382
34.7498	35.497	Train	CCC1CC(C)CC1C	412	0.747214
35.3336	35.311	Train	CCC1CC(C)CC1C	418.15	0.02261
27.8615	27.941	Train	CCC1CC1C	331.81	0.079466
28.5607	28.679	Train	CCC1CC1C	340.16	0.118339
31.6498	31.618	Train	CCC1CC=CC1	371.36	0.031784
33.1747	33.37	Train	CCC1CCC(C)C1	394.25	0.195348
35.2887	35.311	Train	CCC1CCC(C)C1C	418.15	0.022315
34.6242	34.691	Train	CCC1CCC(C)C1C	411.15	0.066847
35.9538	35.931	Train	CCC1CCC(C)C1C	425.15	0.02281
36.0006	35.979	Train	CCC1CCC(C)CC1	424.15	0.02158
35.7158	35.712	Train	CCC1CCC(C)CC1	421.15	0.00379
36.1318	36.155	Train	CCC1CCC(CC)C1	423.15	0.023176
36.1318	36.155	Train	CCC1CCC(CC)C1	423.15	0.02317
29.1262	29.123	Train	CCC1CCC1	343.75	0.00316
44.6075	44.668	Train	CCC1CCC2CCCCC2C1	508.15	0.060548
36.0345	35.979	Train	CCC1CCCC(C)C1	424.15	0.0555
31.9284	32.246	Train	CCC1CCCC1	376.62	0.317644
34.7713	34.782	Train	CCC1CCCC1(C)C	411.15	0.01074
33.7971	33.988	Train	CCC1CCCC1C	401.2	0.19086
33.161	33.379	Train	CCC1CCCC1C	394.35	0.217955
36.4517	36.474	Train	CCC1CCCC1CC	426.71	0.022256
35.8798	35.934	Train	CCC1CCCC1CC	420.68	0.05418
46.9513	47.078	Train	CCC1CCCC2CCCCC12	533.15	0.126733
46.4884	46.595	Train	CCC1CCCC2CCCCC12	528.15	0.106574
36.4783	36.433	Train	CCC1CCCCC1C	429.25	0.04525
33.2051	33.141	Train	CCC1CCCO1	382.15	0.0641
45.2469	45.108	Train	CCC1CCCc2ccccc21	512.72	0.138902
29.2634	29.169	Train	CCC1CO1	336.57	0.094363
28.6721	28.902	Train	CCC=C(C)C	340.45	0.2299
32.8256	32.842	Train	CCC=C(C)C(C)C	387.15	0.0164
31.2059	31.28	Train	CCC=C(C)CC	368.55	0.074052
31.0294	31.115	Train	CCC=C(C)CC	366.69	0.085638
33.8738	33.856	Train	CCC=C(C)CCC	395.15	0.017795
33.8738	33.856	Train	CCC=C(C)CCC	395.15	0.017787
33.2787	33.317	Train	CCC=C(CC)CC	389.15	0.038317
50.5499	50.44	Train	CCC=C(c1ccccc1)c1ccccc1	567.85	0.10992
48.3055	43.105	Train	CCC=CC(=O)O	473.15	5.20047
46.3482	41.677	Train	CCC=CC(=O)O	458.15	4.67123
31.3947	31.325	Train	CCC=CC(C)(C)C	374	0.06966
31.8294	31.727	Train	CCC=CC(C)(C)C	378.58	0.102428
30.3188	30.407	Train	CCC=CC(C)C	359.15	0.088194
30.3101	30.398	Train	CCC=CC(C)C	359.05	0.087926
32.8278	32.917	Train	CCC=CC(C)CC	385.15	0.089195
32.8278	32.917	Train	CCC=CC(C)CC	385.15	0.089203
28.7019	28.884	Train	CCC=CCC	339.6	0.182092
33.1196	33.186	Train	CCC=CCC(C)C	388.15	0.066386
33.1196	33.186	Train	CCC=CCC(C)C	388.15	0.066386
31.4567	31.581	Train	CCC=CCCC	368.9	0.124266
31.4489	31.486	Train	CCC=CCCC	368.82	0.03712
34.1716	34.202	Train	CCC=CCCCC	396.05	0.030434
40.7692	40.563	Train	CCC=Cc1ccccc1	462.15	0.206188
41.6703	41.453	Train	CCC=Cc1ccccc1	471.83	0.21734
28.2622	28.64	Train	CCC=O	321.15	0.377762
22.4021	22.435	Train	CCCC	272.65	0.03291
36.0256	36.341	Train	CCCC(=O)C(C)C	406.15	0.31541
35.2726	35.316	Train	CCCC(=O)CC	396.65	0.043367
37.3266	37.724	Train	CCCC(=O)CCC	417.15	0.397416
33.8046	33.298	Train	CCCC(=O)OC	375.9	0.506573
45.5666	46.733	Train	CCCC(=O)OC(=O)CCC	468.15	1.16641
36.4381	36.391	Train	CCCC(=O)OC(C)(C)C	409.15	0.04708
42.9595	47.111	Train	CCCC(=O)OC(C)(C)CC	460.31	4.1515
43.6074	46.815	Train	CCCC(=O)OC(C)C(C)C	462.66	3.20759
38.7675	38.214	Train	CCCC(=O)OC(C)CC	425.15	0.55351
43.5884	46.793	Train	CCCC(=O)OC(CC)CC	463.1	3.20459
35.5964	35.109	Train	CCCC(=O)OCC	394.65	0.48736
42.6672	45.741	Train	CCCC(=O)OCC(C)(C)C	460.31	3.07376
39.003	37.627	Train	CCCC(=O)OCC(C)C	430.05	1.37604
41.8343	41.509	Train	CCCC(=O)OCC(C)CC	452.15	0.325312
41.6535	41.638	Train	CCCC(=O)OCCC(C)C	452.15	0.015477
40.7957	40.928	Train	CCCC(C(C)(C)C)C(C)(C)C	469.15	0.13235
38.3209	37.863	Train	CCCC(C(C)C)C(C)(C)C	445.15	0.457915
40.6661	40.737	Train	CCCC(C(C)C)C(C)(C)CC	467.15	0.070855
37.9853	36.61	Train	CCCC(C(C)C)C(C)C	439.86	1.37526
40.5205	40.546	Train	CCCC(C(C)C)C(C)C(C)C	465.15	0.025454
40.9369	40.833	Train	CCCC(C(C)C)C(CC)CC	468.15	0.103943
40.267	40.355	Train	CCCC(C(C)CC)C(C)(C)C	463.15	0.087986
41.0032	40.928	Train	CCCC(C(C)CC)C(C)CC	469.15	0.0752
39.0599	38.577	Train	CCCC(C)(C(C)C)C(C)C	453.15	0.48293
41.3575	41.406	Train	CCCC(C)(C(C)C)C(C)CC	474.15	0.04854
29.3911	29.262	Train	CCCC(C)(C)C	352.34	0.129083
36.9322	36.359	Train	CCCC(C)(C)C(C)(C)C	433.48	0.57319
41.4387	41.597	Train	CCCC(C)(C)C(C)(C)C(C)C	476.15	0.15831
39.469	38.557	Train	CCCC(C)(C)C(C)(C)CC	457.15	0.91197
41.2377	41.31	Train	CCCC(C)(C)C(C)(C)CCC	473.15	0.072264
41.7285	41.789	Train	CCCC(C)(C)C(C)(CC)CC	478.15	0.060526
38.8966	38.399	Train	CCCC(C)(C)C(C)C(C)C	451.15	0.497572
37.2193	37.07	Train	CCCC(C)(C)C(C)CC	434.26	0.149257
42.1465	42.036	Train	CCCC(C)(C)C(C)O	433	0.110545
40.684	40.737	Train	CCCC(C)(C)C(CC)C(C)C	467.15	0.053032
38.8011	38.561	Train	CCCC(C)(C)C(CC)CC	449.15	0.240083
32.5513	32.639	Train	CCCC(C)(C)CC	385.12	0.08766
38.0765	37.319	Train	CCCC(C)(C)CC(C)(C)C	443.15	0.75751
40.9392	41.024	Train	CCCC(C)(C)CC(C)(C)CC	470.15	0.084764
36.3333	36.359	Train	CCCC(C)(C)CC(C)C	424.16	0.02567
40.7561	40.833	Train	CCCC(C)(C)CC(C)C(C)C	468.15	0.076904
38.1869	38.021	Train	CCCC(C)(C)CC(C)CC	443.15	0.16594
40.4386	40.451	Train	CCCC(C)(C)CC(CC)CC	464.15	0.012447
34.9321	35.355	Train	CCCC(C)(C)CCC	408.36	0.422947
39.5563	39.783	Train	CCCC(C)(C)CCC(C)(C)C	457.15	0.226726
40.2872	40.355	Train	CCCC(C)(C)CCC(C)CC	463.15	0.067772
44.8207	44.603	Train	CCCC(C)(C)CCO	454	0.217717
38.357	37.132	Train	CCCC(C)(C)O	394.56	1.22504
40.4476	40.546	Train	CCCC(C)(CC(C)C)C(C)C	465.15	0.098395
39.0598	38.203	Train	CCCC(C)(CC)C(C)(C)C	453.15	0.856837
37.4601	37.196	Train	CCCC(C)(CC)C(C)C	436.86	0.264083
41.0459	41.119	Train	CCCC(C)(CC)C(C)C(C)C	471.15	0.073056
39.2661	39.011	Train	CCCC(C)(CC)C(C)CC	454.15	0.255075
41.4729	41.406	Train	CCCC(C)(CC)C(CC)CC	474.15	0.06689
35.3703	35.731	Train	CCCC(C)(CC)CC	413.76	0.360654
40.6338	40.737	Train	CCCC(C)(CC)CC(C)(C)C	467.15	0.10322
38.2174	38.021	Train	CCCC(C)(CC)CC(C)C	443.15	0.19644
40.2957	40.355	Train	CCCC(C)(CC)CC(C)CC	463.15	0.059277
37.4511	37.321	Train	CCCC(C)(CC)CCC	433.96	0.130096
40.5908	40.641	Train	CCCC(C)(CC)CCC(C)C	466.15	0.050164
41.0444	41.119	Train	CCCC(C)(CCC)C(C)(C)C	471.15	0.07465
39.1581	38.921	Train	CCCC(C)(CCC)C(C)C	453.15	0.237066
41.125	41.119	Train	CCCC(C)(CCC)C(C)CC	471.15	0.006042
40.2314	40.26	Train	CCCC(C)(CCC)CC(C)C	462.15	0.028593
39.2233	39.089	Train	CCCC(C)(CCC)CCC	451.15	0.134343
57.9028	58.541	Train	CCCC(C)(CO)CO	509.85	0.638244
43.0769	42.767	Train	CCCC(C)(O)C(C)(C)C	446.25	0.30986
42.0981	41.869	Train	CCCC(C)(O)C(C)C	431.35	0.22909
40.7722	40.45	Train	CCCC(C)(O)CC	415.95	0.322205
43.982	43.835	Train	CCCC(C)(O)CC(C)(C)C	454.15	0.147002
45.8074	45.748	Train	CCCC(C)(O)CC(C)CC	464	0.059396
46.0674	45.867	Train	CCCC(C)(O)CCC(C)C	465.15	0.20036
55.9656	55.918	Train	CCCC(C)(O)CO	490	0.04759
33.6038	33.575	Train	CCCC(C)=C(C)C	394.92	0.02876
28.0343	27.942	Train	CCCC(C)C	333.41	0.092271
34.4951	34.769	Train	CCCC(C)C(C)(C)C	406.75	0.27389
41.151	41.31	Train	CCCC(C)C(C)(C)C(C)(C)C	473.15	0.159045
39.2697	38.756	Train	CCCC(C)C(C)(C)C(C)C	455.15	0.513676
41.3522	41.406	Train	CCCC(C)C(C)(C)C(C)CC	474.15	0.05375
37.2636	37.196	Train	CCCC(C)C(C)(C)CC	435.06	0.067596
40.3625	40.451	Train	CCCC(C)C(C)(C)CC(C)C	464.15	0.08846
41.5503	41.597	Train	CCCC(C)C(C)(CC)C(C)C	476.15	0.046734
41.3214	41.31	Train	CCCC(C)C(C)(CC)CCC	473.15	0.011426
36.7811	36.997	Train	CCCC(C)C(C)=O	413.15	0.215925
38.6891	38.22	Train	CCCC(C)C(C)C(C)(C)C	449.15	0.46908
41.0439	41.119	Train	CCCC(C)C(C)C(C)(C)CC	471.15	0.075127
41.042	41.024	Train	CCCC(C)C(C)C(C)C(C)C	470.15	0.017996
39.3679	39.4	Train	CCCC(C)C(C)C(C)CC	454.15	0.03207
41.1994	41.119	Train	CCCC(C)C(C)C(C)CCC	471.15	0.08045
41.3501	41.215	Train	CCCC(C)C(C)C(CC)CC	472.15	0.13513
35.54	36.359	Train	CCCC(C)C(C)CC	413.76	0.81897
39.9328	40.069	Train	CCCC(C)C(C)CC(C)(C)C	460.15	0.13624
38.8766	38.945	Train	CCCC(C)C(C)CC(C)C	449.15	0.06835
41.0763	41.024	Train	CCCC(C)C(C)CC(C)CC	470.15	0.05228
37.6776	37.865	Train	CCCC(C)C(C)CCC	435.29	0.187395
40.9649	40.928	Train	CCCC(C)C(C)CCC(C)C	469.15	0.036912
48.5992	48.889	Train	CCCC(C)C(C)CCCO	485	0.289837
42.2771	41.845	Train	CCCC(C)C(C)O	425.15	0.43215
41.8531	41.789	Train	CCCC(C)C(CC)(CC)CC	478.15	0.064104
40.4759	40.546	Train	CCCC(C)C(CC)C(C)(C)C	465.15	0.070063
39.1905	39.218	Train	CCCC(C)C(CC)C(C)C	452.15	0.02747
41.1142	41.024	Train	CCCC(C)C(CC)C(C)CC	470.15	0.090243
39.4532	39.664	Train	CCCC(C)C(CC)CCC	453.15	0.210753
46.6106	46.61	Train	CCCC(C)C(CC)CO	466.15	0.00058
41.0702	40.928	Train	CCCC(C)C(CCC)CCC	469.15	0.14218
42.0953	42.466	Train	CCCC(C)C(O)CC	428.55	0.37074
46.0667	46.241	Train	CCCC(C)C(O)CC(C)C	464	0.174258
45.6151	45.481	Train	CCCC(C)C(O)CCC	455	0.13406
34.608	34.976	Train	CCCC(C)C=O	390.15	0.367983
36.0433	36.401	Train	CCCC(C)CC(C)(C)C	421.46	0.35771
40.6367	40.737	Train	CCCC(C)CC(C)(C)C(C)C	467.15	0.100266
38.5816	38.381	Train	CCCC(C)CC(C)(C)CC	447.15	0.200635
40.4364	40.451	Train	CCCC(C)CC(C)(C)CCC	464.15	0.01459
44.5991	44.55	Train	CCCC(C)CC(C)(C)O	455	0.0491
34.88	35.355	Train	CCCC(C)CC(C)C	406.05	0.475003
40.4149	40.546	Train	CCCC(C)CC(C)C(C)(C)C	465.15	0.131052
38.9741	39.036	Train	CCCC(C)CC(C)C(C)C	450.15	0.0619
41.0748	41.024	Train	CCCC(C)CC(C)C(C)CC	470.15	0.050814
37.4227	37.74	Train	CCCC(C)CC(C)CC	432.56	0.317263
40.5978	40.546	Train	CCCC(C)CC(C)CC(C)C	465.15	0.051816
39.3623	39.573	Train	CCCC(C)CC(C)CCC	452.15	0.210695
44.2164	44.14	Train	CCCC(C)CC(C)O	444.75	0.076442
40.7957	40.737	Train	CCCC(C)CC(CC)C(C)C	467.15	0.058677
39.4399	39.664	Train	CCCC(C)CC(CC)CC	453.15	0.224078
41.0825	40.928	Train	CCCC(C)CC(CC)CCC	469.15	0.154542
33.5812	33.877	Train	CCCC(C)CCC	390.86	0.295846
38.2711	38.111	Train	CCCC(C)CCC(C)(C)C	444.15	0.16014
41.1146	41.119	Train	CCCC(C)CCC(C)(C)CC	471.15	0.00443
37.3577	37.823	Train	CCCC(C)CCC(C)C	431.66	0.465334
41.1475	41.119	Train	CCCC(C)CCC(C)C(C)C	471.15	0.028545
45.0728	45.377	Train	CCCC(C)CCC(C)O	454	0.304185
40.2899	40.355	Train	CCCC(C)CCCC(C)(C)C	463.15	0.065087
41.6574	41.502	Train	CCCC(C)CCCC(C)CC	475.15	0.155417
49.2274	49.099	Train	CCCC(C)CCCC(C)O	487	0.12838
41.6327	41.502	Train	CCCC(C)CCCCC(C)C	475.15	0.13069
48.0231	47.821	Train	CCCC(C)CCCCO	473	0.202117
46.004	45.792	Train	CCCC(C)CCCO	456.35	0.21199
44.8599	44.34	Train	CCCC(C)CCO	445.15	0.51988
42.7175	42.879	Train	CCCC(C)CO	421.15	0.161455
39.7443	39.805	Train	CCCC(C)O	392.15	0.060745
31.8592	31.504	Train	CCCC(C)OC	364.15	0.355196
40.8599	42.198	Train	CCCC(C)OC(=O)CC	440.22	1.3381
36.5942	36.229	Train	CCCC(C)OC(C)=O	406.15	0.365185
35.0075	34.71	Train	CCCC(C)OC=O	393.76	0.297538
40.785	40.778	Train	CCCC(C)c1ccccc1	463.15	0.00699
50.2444	50.272	Train	CCCC(C1CCCCC1)C1CCCCC1	566.12	0.0276
39.4388	39.592	Train	CCCC(CC(C)(C)C)C(C)C	455.15	0.153172
39.7553	39.878	Train	CCCC(CC(C)C)C(C)(C)C	458.15	0.122667
38.5421	38.582	Train	CCCC(CC(C)C)C(C)C	445.15	0.039947
40.3926	40.355	Train	CCCC(CC(C)C)C(C)CC	463.15	0.0376
39.8521	39.84	Train	CCCC(CC(C)C)CC(C)C	457.75	0.012093
40.5804	40.546	Train	CCCC(CC(C)CC)C(C)C	465.15	0.034368
41.2809	41.31	Train	CCCC(CC)(C(C)C)C(C)C	473.15	0.02913
39.8032	39.462	Train	CCCC(CC)(CC)C(C)C	459.15	0.34116
41.7751	41.693	Train	CCCC(CC)(CC)C(C)CC	477.15	0.08212
37.947	37.614	Train	CCCC(CC)(CC)CC	439.46	0.332968
39.426	39.298	Train	CCCC(CC)(CC)CCC	453.45	0.12804
41.348	41.31	Train	CCCC(CC)(CCC)C(C)C	473.15	0.037984
41.1422	41.024	Train	CCCC(CC)(CCC)CCC	470.15	0.11816
36.7753	36.694	Train	CCCC(CC)C(C)(C)C	429.26	0.081337
39.2125	38.921	Train	CCCC(CC)C(C)(C)CC	453.15	0.2915
44.3163	44.158	Train	CCCC(CC)C(C)(C)O	451.15	0.1583
41.4545	41.406	Train	CCCC(CC)C(C)(CC)CC	474.15	0.04852
35.3579	35.982	Train	CCCC(CC)C(C)C	411.16	0.624082
40.5793	40.641	Train	CCCC(CC)C(C)C(C)(C)C	466.15	0.061723
39.2245	39.218	Train	CCCC(CC)C(C)C(C)C	452.15	0.006464
41.243	41.119	Train	CCCC(CC)C(C)C(C)CC	471.15	0.124023
37.687	37.656	Train	CCCC(CC)C(C)CC	435.36	0.030974
40.7196	40.641	Train	CCCC(CC)C(C)CC(C)C	466.15	0.07861
39.4502	39.664	Train	CCCC(CC)C(CC)CC	453.15	0.213805
41.2349	41.024	Train	CCCC(CC)C(CC)CCC	470.15	0.210943
33.6551	33.689	Train	CCCC(CC)CC	391.69	0.033917
40.4259	40.451	Train	CCCC(CC)CC(C)(C)CC	464.15	0.025112
37.1772	37.363	Train	CCCC(CC)CC(C)C	429.36	0.185784
40.7625	40.737	Train	CCCC(CC)CC(C)C(C)C	467.15	0.025547
39.071	39.298	Train	CCCC(CC)CC(C)CC	449.15	0.227047
46.7225	46.538	Train	CCCC(CC)CC(C)O	465.15	0.18455
40.2171	40.26	Train	CCCC(CC)CCC(C)(C)C	462.15	0.04286
39.2851	39.481	Train	CCCC(CC)CCC(C)C	451.15	0.195874
41.3739	41.215	Train	CCCC(CC)CCC(C)CC	472.15	0.158875
41.2396	41.119	Train	CCCC(CC)CCCC(C)C	471.15	0.120628
45.5802	45.442	Train	CCCC(CC)CCO	453	0.138177
44.5417	43.718	Train	CCCC(CC)CO	439.15	0.82368
38.6078	38.381	Train	CCCC(CCC)C(C)(C)C	447.15	0.226796
40.9384	40.928	Train	CCCC(CCC)C(C)(C)CC	469.15	0.010442
37.4286	37.447	Train	CCCC(CCC)C(C)C	432.06	0.018358
40.8037	40.737	Train	CCCC(CCC)C(C)C(C)C	467.15	0.066745
39.3586	39.573	Train	CCCC(CCC)C(C)CC	452.15	0.2144
41.119	40.928	Train	CCCC(CCC)C(CC)CC	469.15	0.191007
38.9525	39.114	Train	CCCC(CCC)CC(C)C	447.15	0.161462
40.8677	40.737	Train	CCCC(CCC)CC(C)CC	467.15	0.13066
37.5499	38.116	Train	CCCC(CCC)CCC	430.66	0.56614
40.5896	40.451	Train	CCCC(CCC)CCC(C)C	464.15	0.138577
46.3552	46.664	Train	CCCC(CCC)CCO	462	0.30879
48.2458	47.141	Train	CCCC(CO)C(C)C	473.74	1.10482
46.8972	46.588	Train	CCCC(CO)CC(C)C	465.15	0.309194
46.0434	45.353	Train	CCCC(CO)CCC	452.15	0.69038
55.5978	56.831	Train	CCCC(CO)CCO	485.43	1.23318
45.5389	45.381	Train	CCCC(O)(C(C)C)C(C)C	465.15	0.15791
44.495	44.613	Train	CCCC(O)(C(C)C)C(C)C	457.15	0.11799
45.0857	44.78	Train	CCCC(O)(CC)C(C)C	457.25	0.305655
45.7591	45.661	Train	CCCC(O)(CCC)C(C)C	463.15	0.09813
41.8371	41.657	Train	CCCC(O)C(C)(C)C	429.25	0.18006
41.2469	41.128	Train	CCCC(O)C(C)C	418.15	0.11895
43.547	43.426	Train	CCCC(O)C(C)CC	437.85	0.120986
55.3638	55.155	Train	CCCC(O)C(C)O	478.15	0.20881
43.7831	43.571	Train	CCCC(O)CC(C)C	439.25	0.212142
45.5724	45.481	Train	CCCC(O)CC(C)CC	455	0.09138
58.2649	59.008	Train	CCCC(O)CC(C)O	508.21	0.743146
45.7225	45.481	Train	CCCC(O)CCC(C)C	455	0.241527
60.0686	67.889	Train	CCCC(O)CCCO	515.15	7.82035
59.2972	59.35	Train	CCCC(O)CCO	508.15	0.052827
49.5752	49.43	Train	CCCC(c1ccccc1)c1ccccc1	557.44	0.14521
35.8438	35.893	Train	CCCC1(C)CCCC1	419.15	0.049174
34.711	34.76	Train	CCCC1=CCCC1	404.35	0.048975
29.1591	29.203	Train	CCCC1CC1	342.3	0.043937
35.8771	35.976	Train	CCCC1CCC(C)C1	421.15	0.09886
35.8771	35.976	Train	CCCC1CCC(C)C1	421.15	0.09887
34.446	34.593	Train	CCCC1CCCC1	404.11	0.147016
35.6917	35.83	Train	CCCC1CCCC1C	419.52	0.138266
36.873	36.497	Train	CCCC1CCCCC1	429.9	0.375986
46.8989	46.73	Train	CCCC1CCCc2ccccc21	529.55	0.168926
47.2863	47.175	Train	CCCC1CCc2ccccc2C1	534.15	0.111343
33.755	33.766	Train	CCCC=C(C)CC	394.15	0.01103
33.755	33.766	Train	CCCC=C(C)CC	394.15	0.011026
51.9355	51.807	Train	CCCC=C(c1ccccc1)c1ccccc1	581.91	0.12853
32.888	32.917	Train	CCCC=CC(C)C	385.15	0.028984
34.1273	34.169	Train	CCCC=CCCC	395.69	0.041734
34.0998	33.715	Train	CCCC=CCCC	395.41	0.384804
30.8198	31.788	Train	CCCC=O	347.95	0.968195
25.9607	25.99	Train	CCCCC	309.22	0.029286
37.6756	38.045	Train	CCCCC(=O)CC	420.55	0.369425
46.7626	48.54	Train	CCCCC(=O)O	458.65	1.77736
40.2409	40.355	Train	CCCCC(C(C)C)C(C)(C)C	463.15	0.114087
39.1862	39.154	Train	CCCCC(C(C)C)C(C)C	451.45	0.032165
40.8623	40.833	Train	CCCCC(C(C)C)C(C)CC	468.15	0.029335
41.3142	41.406	Train	CCCCC(C)(C(C)C)C(C)C	474.15	0.09178
32.1655	32.366	Train	CCCCC(C)(C)C	379.99	0.20054
39.0652	38.203	Train	CCCCC(C)(C)C(C)(C)C	453.15	0.862193
41.4171	41.502	Train	CCCCC(C)(C)C(C)(C)CC	475.15	0.084924
37.1812	37.196	Train	CCCCC(C)(C)C(C)C	433.36	0.0148
40.8355	40.928	Train	CCCCC(C)(C)C(C)C(C)C	469.15	0.092543
39.2663	39.011	Train	CCCCC(C)(C)C(C)CC	454.15	0.255277
41.1551	41.119	Train	CCCCC(C)(C)C(CC)CC	471.15	0.036083
38.3546	38.111	Train	CCCCC(C)(C)CC(C)C	444.15	0.243553
40.4308	40.451	Train	CCCCC(C)(C)CC(C)CC	464.15	0.020202
37.1743	37.238	Train	CCCCC(C)(C)CCC	430.66	0.0637
40.3	40.355	Train	CCCCC(C)(C)CCC(C)C	463.15	0.055
39.1281	38.998	Train	CCCCC(C)(C)CCCC	450.15	0.130063
44.2904	43.748	Train	CCCCC(C)(C)CO	445.65	0.542367
40.8525	40.45	Train	CCCCC(C)(C)O	415.95	0.40253
41.2152	41.31	Train	CCCCC(C)(CC)C(C)(C)C	473.15	0.094813
41.4058	41.406	Train	CCCCC(C)(CC)C(C)CC	474.15	0.00023
37.7003	37.53	Train	CCCCC(C)(CC)CC	436.96	0.170317
40.4036	40.451	Train	CCCCC(C)(CC)CC(C)C	464.15	0.047413
39.373	39.27	Train	CCCCC(C)(CC)CCC	453.15	0.10304
41.165	41.119	Train	CCCCC(C)(CC)CCCC	471.15	0.04604
41.0799	41.119	Train	CCCCC(C)(CCC)C(C)C	471.15	0.039097
40.9153	40.833	Train	CCCCC(C)(CCC)CCC	468.15	0.08226
44.6933	44.339	Train	CCCCC(C)(O)C(C)(C)C	459.15	0.354314
45.9427	45.748	Train	CCCCC(C)(O)C(C)CC	464	0.194722
46.0576	45.748	Train	CCCCC(C)(O)CC(C)C	464	0.30957
45.5557	44.901	Train	CCCCC(C)(O)CCC	454.15	0.654683
48.1668	48.853	Train	CCCCC(C)(O)CCCC	475.15	0.686183
55.7866	56.686	Train	CCCCC(C)(O)CO	494.25	0.899417
30.8526	31.165	Train	CCCCC(C)C	363.2	0.312442
36.9128	37.112	Train	CCCCC(C)C(C)(C)C	430.76	0.19915
41.3023	41.406	Train	CCCCC(C)C(C)(C)C(C)C	474.15	0.103746
41.0972	41.119	Train	CCCCC(C)C(C)(C)CCC	471.15	0.021836
44.6245	44.55	Train	CCCCC(C)C(C)(C)O	455	0.074454
40.7193	40.833	Train	CCCCC(C)C(C)C(C)(C)C	468.15	0.113685
39.3365	39.309	Train	CCCCC(C)C(C)C(C)C	453.15	0.027517
37.8129	38.033	Train	CCCCC(C)C(C)CC	436.56	0.220054
40.858	40.833	Train	CCCCC(C)C(C)CC(C)C	468.15	0.02501
39.6535	39.848	Train	CCCCC(C)C(C)CCC	455.15	0.19446
41.5328	41.406	Train	CCCCC(C)C(C)CCCC	474.15	0.12678
43.5607	43.571	Train	CCCCC(C)C(C)O	439.25	0.010278
41.0816	41.024	Train	CCCCC(C)C(CC)C(C)C	470.15	0.05761
39.751	39.939	Train	CCCCC(C)C(CC)CC	456.15	0.18803
45.8965	45.898	Train	CCCCC(C)C(O)CC	459	0.0015
48.8587	48.574	Train	CCCCC(C)C(O)CCC	482	0.284692
33.7115	34.038	Train	CCCCC(C)CC	392.08	0.326498
40.2868	40.355	Train	CCCCC(C)CC(C)(C)CC	463.15	0.06821
47.9875	47.908	Train	CCCCC(C)CC(C)(C)O	485	0.07952
37.1709	37.823	Train	CCCCC(C)CC(C)C	429.06	0.652117
40.9418	40.928	Train	CCCCC(C)CC(C)C(C)C	469.15	0.01384
39.4723	39.664	Train	CCCCC(C)CC(C)CC	453.15	0.191668
41.2638	41.119	Train	CCCCC(C)CC(C)CCC	471.15	0.1448
41.3724	41.215	Train	CCCCC(C)CC(CC)CC	472.15	0.15739
48.285	48.574	Train	CCCCC(C)CC(O)CC	482	0.28903
36.0539	36.186	Train	CCCCC(C)CCC	415.59	0.132064
39.3955	39.573	Train	CCCCC(C)CCC(C)C	452.15	0.177465
41.5581	41.406	Train	CCCCC(C)CCC(C)CC	474.15	0.15215
48.8013	49.099	Train	CCCCC(C)CCC(C)O	487	0.29771
38.2897	37.984	Train	CCCCC(C)CCCC	438.3	0.305665
41.2715	41.119	Train	CCCCC(C)CCCC(C)C	471.15	0.15255
49.1908	49.568	Train	CCCCC(C)CCCCO	487	0.377155
47.458	47.821	Train	CCCCC(C)CCCO	473	0.362977
45.9228	46.084	Train	CCCCC(C)CCO	459.15	0.16116
44.0021	43.407	Train	CCCCC(C)CO	436.15	0.59509
41.9402	42.932	Train	CCCCC(C)O	413.04	0.991803
51.5996	51.636	Train	CCCCC(C1CCCCC1)C1CCCCC1	580.15	0.036394
40.3551	40.355	Train	CCCCC(CC(C)C)C(C)C	463.15	0.000125
41.6136	41.597	Train	CCCCC(CC)(CC)C(C)C	476.15	0.016594
41.3612	41.31	Train	CCCCC(CC)(CC)CCC	473.15	0.05118
38.7818	38.561	Train	CCCCC(CC)C(C)(C)C	449.15	0.220754
41.1187	41.119	Train	CCCCC(CC)C(C)(C)CC	471.15	0.000317
37.6627	37.74	Train	CCCCC(CC)C(C)C	434.36	0.077322
41.1022	41.024	Train	CCCCC(CC)C(C)C(C)C	470.15	0.078215
39.6545	39.848	Train	CCCCC(CC)C(C)CC	455.15	0.19352
41.2637	41.119	Train	CCCCC(CC)C(C)CCC	471.15	0.144664
46.4807	46.21	Train	CCCCC(CC)C(C)O	462	0.27069
45.46	45.481	Train	CCCCC(CC)C(C)O	455	0.021
41.4134	41.215	Train	CCCCC(CC)C(CC)CC	472.15	0.19843
36.0992	36.106	Train	CCCCC(CC)CC	416.35	0.006826
39.996	40.069	Train	CCCCC(CC)CC(C)(C)C	460.15	0.073036
39.1281	39.298	Train	CCCCC(CC)CC(C)C	449.15	0.16988
38.1139	38.907	Train	CCCCC(CC)CCC	436.8	0.793112
41.0522	40.928	Train	CCCCC(CC)CCC(C)C	469.15	0.124155
39.709	40.025	Train	CCCCC(CC)CCCC	453.15	0.31596
48.489	48.574	Train	CCCCC(CC)CCO	480.15	0.08499
46.4775	50.804	Train	CCCCC(CC)CO	457.75	4.32646
40.4016	40.451	Train	CCCCC(CCC)C(C)(C)C	464.15	0.049434
39.3228	39.481	Train	CCCCC(CCC)C(C)C	451.15	0.158208
41.1364	41.024	Train	CCCCC(CCC)C(C)CC	470.15	0.11242
40.6141	40.451	Train	CCCCC(CCC)CC(C)C	464.15	0.163067
39.7167	40.025	Train	CCCCC(CCC)CCC	453.15	0.30825
41.3518	41.024	Train	CCCCC(CCC)CCCC	470.15	0.327795
41.2869	41.119	Train	CCCCC(CCCC)C(C)C	471.15	0.16789
46.885	46.664	Train	CCCCC(CO)CCC	462	0.221044
46.1492	45.969	Train	CCCCC(O)(CC)C(C)C	466.15	0.18017
45.3996	45.024	Train	CCCCC(O)(CC)CC	455.35	0.375635
69.2636	73.487	Train	CCCCC(O)C(=O)O	576	4.22338
44.7081	44.142	Train	CCCCC(O)C(C)(C)C	451	0.56606
44.1358	43.726	Train	CCCCC(O)C(C)C	440.75	0.40975
45.4858	45.288	Train	CCCCC(O)C(C)CC	453.15	0.197764
58.6684	59.008	Train	CCCCC(O)C(C)O	508.21	0.339642
47.0303	46.896	Train	CCCCC(O)C(CC)CC	466	0.13426
43.5577	42.754	Train	CCCCC(O)CC	429.85	0.80367
46.105	45.661	Train	CCCCC(O)CC(C)(C)C	463.15	0.444034
46.1167	45.705	Train	CCCCC(O)CC(C)C	457.15	0.411722
49.1002	48.574	Train	CCCCC(O)CC(C)CC	482	0.52621
46.0213	45.102	Train	CCCCC(O)CCC	449.75	0.919347
49.2761	48.574	Train	CCCCC(O)CCC(C)C	482	0.702054
48.402	47.321	Train	CCCCC(O)CCCC	468.25	1.08099
65.0002	65.749	Train	CCCCC(O)CCCO	557.15	0.74876
57.9305	58.02	Train	CCCCC(O)CO	497.15	0.089492
51.8322	51.723	Train	CCCCC(c1ccccc1)c1ccccc1	581.04	0.10919
59.2673	68.997	Train	CCCCC/C=C\C/C=C\CCCCCCCC(=O)O	628	9.72973
37.141	37.217	Train	CCCCC1=CCCC1	429.15	0.075994
36.9648	36.359	Train	CCCCC1CCCC1	429.76	0.605775
39.2471	38.744	Train	CCCCC1CCCCC1	454.13	0.503116
48.5063	48.348	Train	CCCCC1CCCc2ccccc21	546.28	0.15829
48.9692	48.868	Train	CCCCC1CCc2ccccc2C1	551.65	0.101227
33.9447	33.91	Train	CCCCC=C(C)C	395.75	0.034733
33.6164	34.48	Train	CCCCC=O	376.15	0.863553
48.8713	52.122	Train	CCCCCC(=O)O	478.85	3.25073
40.933	40.928	Train	CCCCCC(C(C)C)C(C)C	469.15	0.00503
34.7355	35.043	Train	CCCCCC(C)(C)C	405.84	0.307496
41.1874	41.31	Train	CCCCCC(C)(C)C(C)(C)C	473.15	0.12261
39.3412	39.101	Train	CCCCCC(C)(C)C(C)C	455.15	0.24018
41.2714	41.31	Train	CCCCCC(C)(C)C(C)CC	473.15	0.038577
37.4742	37.614	Train	CCCCCC(C)(C)CC	434.36	0.13981
40.2938	40.355	Train	CCCCCC(C)(C)CC(C)C	463.15	0.061207
39.1868	39.089	Train	CCCCCC(C)(C)CCC	451.15	0.097768
41.0802	41.024	Train	CCCCCC(C)(C)CCCC	470.15	0.05624
46.1832	46.034	Train	CCCCCC(C)(C)CO	465.15	0.14919
42.0804	42.132	Train	CCCCCC(C)(C)O	429.85	0.051605
41.4274	41.502	Train	CCCCCC(C)(CC)C(C)C	475.15	0.074594
39.8436	39.788	Train	CCCCCC(C)(CC)CC	458.85	0.055586
41.2236	41.215	Train	CCCCCC(C)(CC)CCC	472.15	0.00859
45.6332	45.569	Train	CCCCCC(C)(O)C(C)C	462.25	0.06417
46.2495	45.725	Train	CCCCCC(C)(O)CC	462.15	0.524508
45.3165	44.988	Train	CCCCCC(C)(O)CC	455	0.32854
48.7529	48.058	Train	CCCCCC(C)(O)CCC	482	0.69486
38.1923	38.62	Train	CCCCCC(C)=O	424.05	0.42767
33.6407	33.436	Train	CCCCCC(C)C	390.8	0.204694
39.0434	38.831	Train	CCCCCC(C)C(C)(C)C	452.15	0.212434
41.4569	41.502	Train	CCCCCC(C)C(C)(C)CC	475.15	0.04513
37.9558	38.2	Train	CCCCCC(C)C(C)C	437.47	0.24422
39.936	40.123	Train	CCCCCC(C)C(C)CC	458.15	0.187037
44.8321	45.377	Train	CCCCCC(C)C(C)O	454	0.5449
36.2186	36.401	Train	CCCCCC(C)CC	417.38	0.182376
40.3938	40.451	Train	CCCCCC(C)CC(C)(C)C	464.15	0.05721
41.4329	41.31	Train	CCCCCC(C)CC(C)CC	473.15	0.122938
41.2584	41.119	Train	CCCCCC(C)CCC(C)C	471.15	0.139446
40.3148	40.58	Train	CCCCCC(C)CCCC	459.15	0.265173
42.2517	41.884	Train	CCCCCC(C)CCCCC	479.15	0.367686
48.8927	49.299	Train	CCCCCC(C)CCCO	489.15	0.406292
46.9331	47.821	Train	CCCCCC(C)CCO	473	0.887933
44.7928	44.998	Train	CCCCCC(C)CO	448.75	0.20521
41.7586	41.789	Train	CCCCCC(CC)(CC)CC	478.15	0.030417
40.874	40.928	Train	CCCCCC(CC)C(C)(C)C	469.15	0.053957
39.6962	39.848	Train	CCCCCC(CC)C(C)C	455.15	0.15177
41.5223	41.406	Train	CCCCCC(CC)C(C)CC	474.15	0.116324
38.3528	39.244	Train	CCCCCC(CC)CC	439.66	0.89118
41.2584	41.119	Train	CCCCCC(CC)CC(C)C	471.15	0.139373
40.0766	40.395	Train	CCCCCC(CC)CCC	457.15	0.31837
41.8219	41.502	Train	CCCCCC(CC)CCCC	475.15	0.319938
47.5482	47.716	Train	CCCCCC(CC)CO	472	0.16779
41.2697	41.119	Train	CCCCCC(CCC)C(C)C	471.15	0.15068
41.5459	41.215	Train	CCCCCC(CCC)CCC	472.15	0.33088
50.1395	49.997	Train	CCCCCC(CO)CCC	491.05	0.14253
47.1538	47.035	Train	CCCCCC(O)(CC)CC	472.15	0.118786
46.4805	46.057	Train	CCCCCC(O)C(C)(C)C	467	0.423476
45.955	45.705	Train	CCCCCC(O)C(C)C	457.15	0.25
49.1469	48.574	Train	CCCCCC(O)CC(C)C	482	0.572904
47.7885	47.1	Train	CCCCCC(O)CCC	466.15	0.688498
48.7273	48.208	Train	CCCCCC(O)CCCC	474.15	0.519318
65.9419	67.581	Train	CCCCCC(O)CCCO	571.15	1.63913
61.2953	63.185	Train	CCCCCC(O)CCO	536.15	1.8897
58.7048	59.952	Train	CCCCCC(O)CO	511.15	1.24724
39.3596	39.555	Train	CCCCCC1=CCCC1	452.15	0.195358
39.2919	38.953	Train	CCCCCC1CCCC1	453.76	0.338885
41.4505	40.836	Train	CCCCCC1CCCCC1	476.87	0.614493
50.0724	49.948	Train	CCCCCC1CCCc2ccccc21	562.78	0.12438
50.5367	50.469	Train	CCCCCC1CCc2ccccc2C1	568.15	0.067743
54.9967	54.855	Train	CCCCCC=C(c1ccccc1)c1ccccc1	613.15	0.141746
36.0605	36.542	Train	CCCCCC=O	401.45	0.481537
32.059	31.731	Train	CCCCCCC	371.58	0.327952
50.1472	51.731	Train	CCCCCCC(=O)O	496.15	1.58378
37.0887	37.152	Train	CCCCCCC(C)(C)C	430.05	0.06332
39.4939	39.452	Train	CCCCCCC(C)(C)CC	455.15	0.04186
41.2132	41.215	Train	CCCCCCC(C)(C)CCC	472.15	0.00183
47.2364	47.97	Train	CCCCCCC(C)(C)CO	481.15	0.73362
43.993	44.592	Train	CCCCCCC(C)(C)O	451.15	0.599027
47.9279	48.058	Train	CCCCCCC(C)(O)CC	482	0.130117
36.1831	36.426	Train	CCCCCCC(C)C	416.43	0.24291
40.0509	40.215	Train	CCCCCCC(C)C(C)C	459.15	0.16413
41.454	41.31	Train	CCCCCCC(C)CC(C)C	473.15	0.144006
40.4464	40.756	Train	CCCCCCC(C)CCC	461.05	0.309593
42.2255	41.884	Train	CCCCCCC(C)CCCC	479.15	0.341475
46.9449	47.821	Train	CCCCCCC(C)CO	473	0.87613
53.9948	54.073	Train	CCCCCCC(C1CCCCC1)C1CCCCC1	605.15	0.078245
41.5308	41.406	Train	CCCCCCC(CC)C(C)C	474.15	0.12481
40.4117	40.765	Train	CCCCCCC(CC)CC	461.15	0.353303
41.9868	41.693	Train	CCCCCCC(CC)CCC	477.15	0.293824
47.7523	49.039	Train	CCCCCCC(CC)CO	482	1.28669
48.506	48.527	Train	CCCCCCC(O)C(C)C	481.55	0.020996
47.1526	47.279	Train	CCCCCCC(O)CC	467.85	0.12643
49.2055	49.16	Train	CCCCCCC(O)CCC	483.15	0.045505
66.4407	69.306	Train	CCCCCCC(O)CCCO	585.15	2.86529
61.8854	65.01	Train	CCCCCCC(O)CCO	550.15	3.12456
41.4581	41.171	Train	CCCCCCC1CCCC1	476.26	0.287138
43.4726	42.844	Train	CCCCCCC1CCCCC1	497.86	0.628576
51.5281	51.441	Train	CCCCCCC1CCCc2ccccc21	578.15	0.087053
51.9634	51.928	Train	CCCCCCC1CCc2ccccc2C1	583.15	0.035387
38.3544	38.8	Train	CCCCCCC=O	425.95	0.445584
34.7421	34.766	Train	CCCCCCCC	398.83	0.02389
51.0867	56.31	Train	CCCCCCCC(=O)O	513.05	5.22328
39.309	39.27	Train	CCCCCCCC(C)(C)C	453.15	0.039025
41.5003	41.597	Train	CCCCCCCC(C)(C)CC	476.15	0.096714
47.6898	48.577	Train	CCCCCCCC(C)(C)O	487	0.887246
42.1064	43.018	Train	CCCCCCCC(C)=O	467.15	0.9116
38.4361	38.138	Train	CCCCCCCC(C)C	440.15	0.298104
41.9595	41.884	Train	CCCCCCCC(C)C(C)C	479.15	0.07546
40.5908	40.95	Train	CCCCCCCC(C)CC	463.15	0.359195
42.9745	42.843	Train	CCCCCCCC(C)CC(C)C	489.15	0.131503
46.6596	51.577	Train	CCCCCCCC(C)O	471.65	4.91736
42.3722	42.143	Train	CCCCCCCC(CC)CC	481.85	0.22917
48.0102	49.145	Train	CCCCCCCC(O)CC	483	1.13478
66.8256	70.89	Train	CCCCCCCC(O)CCCO	599.15	4.06444
54.2007	76.11	Train	CCCCCCCC(O)CCO	503.47	21.9093
59.4465	63.665	Train	CCCCCCCC(O)CO	539.15	4.2185
56.1957	63.625	Train	CCCCCCCC/C=C\CCCCCCCC(=O)OC	617	7.42934
43.1785	43.13	Train	CCCCCCCC1=CCCC1	492.15	0.048482
45.4058	44.894	Train	CCCCCCCC1CCCCC1	518.06	0.51183
53.0424	53	Train	CCCCCCCC1CCCc2ccccc21	594.15	0.04242
53.3873	53.39	Train	CCCCCCCC1CCc2ccccc2C1	598.15	0.002717
40.3053	39.947	Train	CCCCCCCC=O	447.15	0.35827
37.1818	37.149	Train	CCCCCCCCC	423.97	0.032847
50.9947	57.713	Train	CCCCCCCCC(=O)O	528.75	6.71826
45.8171	50.524	Train	CCCCCCCCC(=O)OCCCC	503	4.70689
41.3397	41.406	Train	CCCCCCCCC(C)(C)C	474.15	0.066347
43.5536	44.867	Train	CCCCCCCCC(C)=O	483.35	1.31343
44.0476	43.995	Train	CCCCCCCCC(C)C(C)C	501.15	0.052615
[truncated: 1,257 more rows]

## Sheet: Literature_3
Train/Valid/Test	HoV (kJ/mol)	Pred_literature	smiles	temperature	AE
[truncated: 280 more rows]

[truncated: 1 more sheets: Literature_3_GAT]
